# Supplementary material for: Comparative transcriptome sequencing analysis of female and male Decapterus macrosoma
Source: PeerJ. 2022 Nov 8;10:e14342. doi: 10.7717/peerj.14342 (PMC9651050; doi:10.7717/peerj.14342)
Supplement: Supplemental Information 3 [file peerj-10-14342-s003.xlsx]

## Sheet: Content
Content
Table S4	The DEGs identified between the male and female D. macrosoma
Table S5	The DEGs with annotation
Table S6	The GO terms of the DEGs
Table S8	The KEGG enriched pathways of the DEGs

## Sheet: Table S4
#ID	T01_Count	T02_Count	T03_Count	T04_Count	T05_Count	T06_Count	T01_FPKM	T02_FPKM	T03_FPKM	T04_FPKM	T05_FPKM	T06_FPKM	FDR	log2FC	regulated
c100004.graph_c0	26	93	123	431	879	168	0.85	3.18	7.65	11	22.05	5.66	4.84535e-05	2.80439	up
c100028.graph_c0	7	70	47	1312	3594	411	0.19	2.1	1.1	29.96	79.31	11.19	8.80574e-11	5.24409	up
c100029.graph_c0	159	346	397	669	1040	343	4.1	9.71	9.75	15.28	22.99	9.28	0.00253754	1.5073	up
c100043.graph_c0	44	272	242	17	32	11	1.77	11.79	9.19	0.6	1.1	0.46	0.000419229	-2.56701	down
c100045.graph_c2	34	85	92	18	19	8	1.78	4.89	4.61	0.84	0.86	0.44	0.00725866	-1.72061	down
c100057.graph_c0	28	4725	4520	8	2	6	0.7	127.71	106.91	0.18	0.04	0.16	1.67098e-08	-6.44667	down
c100062.graph_c0	22	108	38	2	2	7	0.33	1.97	1.1	0.03	0.2	0.92	0.00469577	-2.84979	down
c100067.graph_c1	82	217	250	28	20	34	2.72	7.5	8.54	1.33	0.51	1.12	0.00553807	-2.00616	down
c100068.graph_c0	52	163	90	857	2812	371	1.13	3.3	1.92	12.89	40.18	6.62	1.54794e-07	3.7009	up
c100070.graph_c0	23	40	28	11471	32626	4298	1.1	2.3	1.38	544.07	1502.93	241.04	1.11708e-41	8.6144	up
c100070.graph_c1	39	318	365	12	25	15	1.7	15.14	15.2	0.47	0.94	0.69	0.000282558	-2.96252	down
c100077.graph_c1	28	32	36	272	1064	100	0.56	0.7	0.69	4.81	18.22	2.1	5.65052e-06	3.63563	up
c100080.graph_c0	128	338	234	32	45	19	2.97	8.52	5.16	0.66	0.89	0.46	1.4437e-06	-2.39205	down
c100092.graph_c0	1016	1292	1105	2415	4583	1873	24.77	34.26	25.63	52.03	95.39	47.93	0.00281722	1.57636	up
c100093.graph_c0	29	7804	8116	102	259	54	0.17	38.82	35.57	0.43	0.98	0.23	0.00185557	-3.8168	down
c100102.graph_c0	22	96	60	2	2	7	0.49	2.33	1.28	0.04	0.04	0.16	0.00161006	-2.97426	down
c100108.graph_c1	403	960	1264	204	205	184	16.76	42.99	51.11	7.74	7.34	8	0.00645201	-1.55598	down
c100115.graph_c2	54	110	52	6	10	9	4.37	10.03	4.02	0.43	0.7	0.77	0.000506031	-2.53887	down
c100115.graph_c3	70	857	891	34	37	41	6.85	91.56	76.94	2.71	3.39	4.08	0.000686268	-3.00302	down
c100136.graph_c0	3	2314	2789	9	41	4	0.07	57.77	62.48	0.22	0.76	0.12	0.000392073	-4.59965	down
c100138.graph_c0	279	573	528	1400	2418	948	16.21	36.22	35.24	59.09	133.2	53.41	7.27613e-08	2.09847	up
c100156.graph_c0	27	97	89	174	416	90	0.94	3.58	2.91	4.85	10.77	2.98	0.00379216	1.92284	up
c100176.graph_c0	159	236	214	526	1286	235	8.05	12.91	10.26	23.56	56.61	12.38	0.00558118	1.8353	up
c100199.graph_c2	21	50	48	100113	39040	66322	3.29	8.58	7.25	14274.9	5403.36	10980.7	3.34084e-65	10.635	up
c100199.graph_c3	235	579	713	1170464	484686	568498	4.32	11.58	12.46	19003.9	7617.8	10952.3	3.12467e-68	10.455	up
c100199.graph_c5	111	262	315	529747	219525	292104	5.59	14.36	15.18	23730.1	9525.1	15449.6	3.97015e-69	10.5151	up
c100200.graph_c1	110	611	482	51	125	39	2.85	16.27	10.67	1.72	3.41	1.03	0.00561649	-1.93881	down
c100204.graph_c1	21	1110	1351	21	19	21	0.49	28.99	30.63	0.43	0.38	0.52	0.000332937	-3.89541	down
c100205.graph_c0	120	358	476	760	1555	421	1.8	5.84	6.79	10.07	19.94	6.62	0.00314147	1.8221	up
c100213.graph_c0	147	749	671	42	121	33	7.15	24.34	17.95	1.21	3.66	1.44	0.000396384	-2.44845	down
c100216.graph_c0	24	193	270	702	1779	279	0.33	2.86	3.5	8.44	20.72	4	0.00298954	2.64468	up
c100217.graph_c0	260	248	292	634	1603	413	6.21	6.44	6.64	13.42	32.8	10.35	0.00658979	1.78332	up
c100220.graph_c0	17	32	33	48	181	59	1.1	0.87	0.95	1.07	3.89	1.74	0.00261056	1.99724	up
c100231.graph_c0	48	50	34	321	756	139	1.04	1.19	0.7	6.16	13.96	3.16	1.68559e-05	3.08212	up
c100248.graph_c1	65	25	61	7	7	6	8.78	3.44	7.4	0.77	0.67	0.82	0.00854367	-2.43781	down
c100250.graph_c0	726	1623	2394	353	579	210	16.1	30.43	30.64	7.15	9.32	4.48	0.00269171	-1.60771	down
c100251.graph_c0	34	4	7	462	678	136	2.56	0.29	0.41	11.57	19.59	8.01	0.000245275	3.92804	up
c100259.graph_c0	336	10285	13607	377	822	287	7.35	213.45	247.11	6.62	13.44	5.78	0.00335343	-3.03732	down
c100259.graph_c1	61	1802	2325	43	136	36	11.96	387.29	440.58	7.63	23.85	7.52	0.00152257	-3.29372	down
c100272.graph_c0	91	922	1111	64	144	45	1.49	19.06	20.77	1.22	2.4	0.92	0.00685805	-2.35714	down
c100274.graph_c5	651	1412	1507	350	478	285	19.84	51.75	48.47	9.36	12.67	10.12	0.00422759	-1.21848	down
c100290.graph_c0	106	548	862	17	34	51	19.65	30.94	42.44	0.89	2.12	6.18	0.00114561	-2.88451	down
c100304.graph_c0	31	143	68	11	6	2	0.49	2.6	1.05	0.15	0.1	0.04	0.000690243	-2.89592	down
c100317.graph_c0	21	142	296	8	12	1	0.84	6.15	11.2	0.28	0.44	0.04	0.000458446	-3.50411	down
c100326.graph_c0	27	169	233	9	0	0	2	7.4	16.89	0.4	0	0	0.00289351	-3.80167	down
c100328.graph_c0	186	1858	2106	121	149	144	7.29	89.2	89.93	4.42	7.28	7.04	0.00492212	-2.42378	down
c100331.graph_c0	1	18	16	2609	8641	861	0.02	0.38	0.29	44.31	142.03	17.35	1.01815e-20	7.78375	up
c100343.graph_c0	103	49	96	8	20	13	10.29	5.74	9.77	0.77	1.87	1.59	0.00980499	-2.21909	down
c100350.graph_c0	803	1127	1718	6	29	18	36.21	32.71	37.86	0.22	0.65	0.56	8.34407e-18	-5.4062	down
c100356.graph_c2	9	39	40	60	164	45	1.67	7.84	7.07	10.18	26.63	8.68	0.00792138	1.8872	up
c100359.graph_c0	1415	8058	13097	647	525	466	10.02	61.88	87.54	4.1	3.17	3.47	0.000170357	-2.91292	down
c100363.graph_c2	33	81	77	15	18	8	2.34	7.05	5.78	0.95	1.1	0.6	0.00520578	-1.72847	down
c100364.graph_c0	5	1012	769	11	42	8	0.08	16.05	12.14	0.2	1.13	0.22	0.0037931	-3.55049	down
c100372.graph_c2	341	1887	1664	251	282	161	11.93	59.09	53.83	8.21	9.13	5.1	0.00580515	-1.83892	down
c100396.graph_c0	124	99	98	428	476	223	4.45	3.63	3.28	13.06	14.4	8.61	0.00479925	1.91715	up
c100416.graph_c0	149	444	476	1586	3906	631	3.72	12.07	11.32	35.09	83.67	16.57	6.34269e-05	2.66955	up
c100417.graph_c0	186	225	233	809	1588	394	4.04	5.34	4.71	15.24	29.18	9.01	0.000137919	2.21863	up
c100419.graph_c0	0	26	13	75	138	37	0	2.01	1.08	3.94	7.9	2.67	0.00689149	2.80831	up
c100434.graph_c0	54	365	417	1234	3767	476	1.25	9.17	9.17	25.22	74.54	11.56	0.00113653	2.80258	up
c100438.graph_c0	4	12	4	68	206	24	0.08	0.27	0.08	1.23	3.62	0.52	1.68197e-05	3.70789	up
c100439.graph_c0	0	17	2	179	293	12	0	0.52	0.05	4.43	7.04	0.36	0.000965033	4.05317	up
c100443.graph_c0	26	543	643	33	40	20	2.72	61.93	64.41	3.1	3.65	2.2	0.00559134	-2.74224	down
c100443.graph_c1	39	939	1295	61	68	45	3.14	82.63	100.21	4.4	4.75	3.81	0.00908232	-2.68185	down
c100449.graph_c0	0	4	12	1049	437	545	0	0.11	0.37	30.19	12.05	17.05	2.01142e-14	6.73305	up
c100451.graph_c1	367	920	1194	135	280	173	9.38	25.38	29.31	3.2	5.94	4.3	0.0059323	-1.55259	down
c100451.graph_c2	24	83	101	8	19	3	2.44	9.45	10.51	0.73	1.78	0.32	0.00448583	-2.25933	down
c100457.graph_c0	20	4479	4728	12	66	4	0.36	89.02	82.2	0.21	1.04	0.08	5.04071e-05	-4.98483	down
c100458.graph_c0	76	64839	77078	258	499	83	1.87	933.98	968.67	3.68	7.65	2.24	3.17686e-05	-5.20395	down
c100465.graph_c2	139	1326	1579	86	165	73	8.3	86.34	90.05	4.58	8.51	4.58	0.00281722	-2.47518	down
c100476.graph_c1	329	995	1249	91	133	121	9.55	36.95	39.9	1.98	2.87	3.35	0.000204138	-2.23721	down
c100492.graph_c0	18	34	34	82	209	37	0.85	1.79	1.6	3.54	8.71	1.84	0.00304168	2.05106	up
c100501.graph_c0	5	19	2	78	243	10	0.25	0.88	0.07	3.31	9.02	0.48	0.0037498	3.24369	up
c100526.graph_c2	25	10171	14063	20	7	15	0.24	103.66	124.69	0.15	0.06	0.15	1.55534e-07	-6.265	down
c100535.graph_c0	71	661	862	52	90	54	2.22	25.68	25.23	1.24	2.47	2.52	0.00962353	-2.23042	down
c100538.graph_c0	13	1361	1884	11	40	8	0.2	22.13	26.51	0.15	0.51	0.12	0.000189361	-4.33486	down
c100546.graph_c0	46	165	171	18	12	10	1.87	7.14	7.98	0.58	0.59	0.37	0.000197024	-2.55241	down
c100552.graph_c0	47	1209	2245	43	114	24	0.87	24.44	39.77	0.71	1.81	0.47	0.00222487	-3.27242	down
c100557.graph_c0	36	93	70	260	704	112	1.38	3.87	2.59	8.84	23.15	4.5	0.000173242	2.53865	up
c100562.graph_c0	65	145	135	287	521	129	1.89	4.59	3.74	7.4	12.95	3.92	0.00280711	1.69119	up
c100565.graph_c0	209	345	400	553	926	387	4.73	8.48	8.61	11.07	17.93	9.18	0.00344308	1.28182	up
c100570.graph_c0	1241	4506	4698	5	8	33	33.9	94.58	88.1	0.09	0.14	0.92	2.71703e-12	-6.18303	down
c100579.graph_c0	31	60	59	137	403	83	0.56	1.19	1.02	2.7	6.31	1.65	0.000574886	2.18717	up
c100587.graph_c0	32	6271	6090	22	5	12	0.41	115.73	94.6	0.28	0.07	0.18	5.8e-07	-5.83042	down
c100590.graph_c0	25	8199	10193	183	309	55	1.03	287.99	313.27	5.93	10.05	2.43	0.00448021	-3.60244	down
c100603.graph_c0	33	58	36	99	281	55	0.49	1.07	0.51	1.37	3.92	1.18	0.00876517	1.85805	up
c100614.graph_c0	56	193	270	409	1649	205	1.19	4.46	5.46	7.69	30.05	4.57	0.00825403	2.2155	up
c100626.graph_c0	20	31	24	83	254	25	0.76	1.29	0.87	2.84	8.32	1.02	0.00966742	2.19961	up
c100641.graph_c0	62	52	42	284	339	135	7.33	6.72	4.77	30.3	35.08	16.82	0.000715239	2.32917	up
c100658.graph_c0	459	377	433	1326	1663	752	16.63	14.86	14.95	42.64	51.76	28.6	0.00818278	1.69601	up
c100665.graph_c0	9696	128	27	11	64	32	426.48	5.6	1.98	0.65	3.6	4.94	0.00130642	-4.54573	down
c100672.graph_c0	8	1598	2591	30	63	12	0.09	20.45	28.99	0.31	0.63	0.15	0.00181964	-3.84485	down
c100683.graph_c0	14	28	16	76	190	36	0.77	1.74	0.85	3.79	9.19	2.12	0.000549457	2.44839	up
c100684.graph_c0	171	927	1559	94	179	70	5.29	19.86	28.63	2.86	5.07	2.78	0.00327404	-2.28568	down
c100693.graph_c0	100	178	163	692	1912	364	2.11	4.09	3.28	12.94	34.62	8.07	2.23479e-06	2.82843	up
c100699.graph_c2	15	465	280	14	23	13	0.74	24.97	13.15	0.61	0.98	0.67	0.00422258	-2.89899	down
c100724.graph_c0	200	1868	1235	47	48	53	5.39	55.41	32.15	1.13	1.07	1.5	4.98339e-06	-3.50872	down
c100742.graph_c0	99	657	756	39	51	46	9.3	23.93	31.3	3.06	3.96	3.7	0.000534282	-2.64337	down
c100749.graph_c0	136	283	293	534	1243	242	2.87	6.5	5.89	9.98	22.47	5.36	0.00707284	1.69259	up
c100759.graph_c1	204	264	211	1016	1118	657	5.3	7.56	5.3	22.84	25.36	17.72	1.0121e-05	2.28435	up
c100764.graph_c0	16	2774	4182	10	23	8	0.31	58.25	72.47	0.19	0.42	0.19	1.73479e-06	-5.46467	down
c100779.graph_c0	263	347	385	1509	4254	633	4.26	6.09	5.93	21.54	58.78	10.72	9.30709e-05	2.66834	up
c100781.graph_c0	43	5735	8688	13	9	4	1.16	166.54	220.15	0.3	0.21	0.11	1.27133e-09	-6.69556	down
c100786.graph_c0	11	2508	2776	15	34	3	0.18	47.14	46.3	0.21	0.47	0.04	6.06453e-05	-4.86492	down
c100788.graph_c1	34	2577	2968	63	134	37	1.19	95.74	96.43	1.89	3.95	1.34	0.0025782	-3.4025	down
c100788.graph_c3	81	2178	2833	117	203	72	2.9	70.54	80.54	2.8	5.4	2.46	0.00746432	-2.75658	down
c100793.graph_c0	164	2609	2531	110	265	72	2.18	43.39	37.28	1.29	3.94	1.36	0.00253082	-2.77538	down
c100802.graph_c0	4	1121	705	5982	16815	2327	0.18	55.64	30.52	239.42	662.66	109.17	0.00629956	3.40822	up
c100808.graph_c0	250	320	412	1315	2824	612	2.61	3.63	4.09	12.11	25.16	7.22	5.68188e-05	2.37871	up
c100829.graph_c0	13	7	3	620	3631	345	0.19	0.11	0.04	7.91	44.83	5.24	3.8309e-12	6.43645	up
c100836.graph_c0	271	903	763	157	227	119	6.84	29.71	22.25	3.2	5.66	2.9	0.00444228	-1.43427	down
c100844.graph_c0	273	348	549	121	98	52	8.75	12.14	16.76	3.44	2.7	1.75	0.00709949	-1.65916	down
c100844.graph_c1	149	224	354	42	47	33	8.97	14.66	20.3	2.25	2.44	2.08	0.000121215	-2.07172	down
c100845.graph_c0	60	141	119	166	350	133	1.17	3	2.21	2.87	5.86	2.74	0.00689149	1.33977	up
c100851.graph_c1	136	749	1010	25	23	41	1.48	15.15	18.93	0.24	0.21	0.46	3.5012e-05	-3.3775	down
c100854.graph_c0	171	294	233	1426	4829	659	7.63	14.64	10.23	61.88	204.92	33.03	2.28507e-06	3.24577	up
c100866.graph_c0	69	5511	5992	169	331	112	2.87	231.5	220.13	5.8	11.02	4.49	0.00655048	-3.10362	down
c100874.graph_c0	103	132	264	26	66	25	2.53	3.52	6.16	0.56	1.39	0.64	0.00923832	-1.6944	down
c100876.graph_c0	344	849	1438	122	167	114	21.45	32.72	45.65	5.73	6.48	5.98	0.000326654	-2.10733	down
c100877.graph_c0	8	3189	3786	16	78	8	0.28	120.03	124.74	0.51	2.32	0.29	0.00055048	-4.38371	down
c100879.graph_c0	66	205	255	505	1031	260	1.52	5.4	5.6	11.01	20.36	6.29	0.000881503	2.05274	up
c100908.graph_c1	0	34	31	509	1606	122	0	1.1	0.88	13.38	40.89	3.8	5.63465e-05	4.53389	up
c100909.graph_c0	2	33	13	1013	2470	291	0.04	0.9	0.27	23.27	58.74	8.32	1.83855e-12	5.96508	up
c100921.graph_c2	37	67	63	8	10	10	2.7	7.29	5.76	0.6	0.59	0.8	0.00219155	-2.03258	down
c100932.graph_c0	1363	3227	2185	474	445	257	67.95	157.45	92.45	20.88	17.85	12.23	3.2451e-05	-2.0364	down
c100942.graph_c0	0	9	33	1119	3077	352	0	0.18	0.56	17.81	47.37	6.64	9.04985e-09	5.96494	up
c100944.graph_c1	26	336	122	11	16	16	4.28	30.79	13.14	1.27	2.11	2.32	0.00621424	-2.54382	down
c100963.graph_c1	344	1312	1664	89	110	75	7.66	31.56	35.03	1.74	2.1	1.74	5.87268e-07	-2.91652	down
c100966.graph_c0	92	146	140	250	559	149	2.46	3.71	3.1	6.01	12.64	3.94	0.00677229	1.53304	up
c100973.graph_c0	342	6188	737	40	7	59	3.13	154.96	5.57	0.37	0.12	0.43	0.000180771	-4.26764	down
c100991.graph_c0	1435	904	605	8973	25070	3348	57.89	39.89	23.06	302.16	814.88	134.35	0.000217891	3.24192	up
c101000.graph_c0	37	102	151	15	31	10	1.18	3.51	4.24	0.37	0.75	0.29	0.00644424	-1.86777	down
c101008.graph_c0	23	556	663	18	58	21	0.38	10.11	10.55	0.27	0.83	0.37	0.00764686	-2.75954	down
c101012.graph_c1	289	894	988	1524	4129	785	4.47	17.88	17.32	25.87	64.53	15.18	0.00873796	1.79151	up
c101018.graph_c1	22	50	105	6	1	5	2.13	2.51	5.88	0.37	0.03	0.49	0.00343726	-2.8595	down
c101050.graph_c0	170	316	229	40	27	51	3.79	7.62	4.81	0.78	0.51	1.21	0.00853766	-1.93862	down
c101067.graph_c2	26	13555	11568	13	17	15	0.49	276.54	206.49	0.22	0.27	0.3	2.75394e-08	-6.44203	down
c101070.graph_c0	1	10	10	62	100	62	0.03	0.27	0.24	1.37	2.13	1.62	7.06682e-08	3.68899	up
c101073.graph_c0	25	97	87	180	164	140	1.14	4.83	3.79	7.32	6.46	6.72	0.00638488	1.70654	up
c101078.graph_c0	21	1391	1443	31	51	17	0.69	47.21	44.09	0.87	1.37	0.56	0.000937432	-3.62653	down
c101080.graph_c0	30	6286	8233	123	343	42	0.6	123.33	140.28	2.41	6.83	0.97	0.00533525	-3.50705	down
c101083.graph_c0	186	4710	9617	226	531	201	2.45	76.82	147.49	2.81	6.88	2.98	0.00668952	-2.91596	down
c101088.graph_c0	10	195	355	974	2838	352	0.14	3.17	5.13	12.99	37.18	5.76	0.00815687	2.85997	up
c101090.graph_c4	10	1361	859	31	32	14	0.41	61.25	33.85	1.14	1.15	0.61	0.00266564	-3.4938	down
c101100.graph_c1	95	4426	5388	83	107	55	6.44	142.57	147.71	5.52	7.03	4.45	9.55608e-05	-4.04533	down
c101104.graph_c6	16	22	27	64	131	32	0.98	1.47	1.58	3.51	7.01	2.07	0.0025018	1.96025	up
c101114.graph_c1	67	1634	1518	56	94	35	1.51	40.03	32.56	1.12	1.82	0.83	0.00100828	-3.15883	down
c101117.graph_c0	1	1	8	35	175	22	0.07	0.07	0.52	2.13	10.34	1.58	6.25589e-05	4.09056	up
c101126.graph_c1	100	509	702	46	133	32	3.83	32.59	40.01	2.33	4.9	1.68	0.00879901	-2.0778	down
c101140.graph_c0	122	213	193	441	1057	202	3.82	7.3	5.76	12.27	28.43	6.64	0.00406219	1.82021	up
c101148.graph_c1	430	5829	7135	464	497	204	9.27	178.78	209.17	8.62	9.19	4.8	0.00354168	-2.65915	down
c101149.graph_c1	13	526	621	16	29	14	0.81	33.29	34.99	0.82	1.49	0.8	0.002973	-3.17895	down
c101151.graph_c0	53	149	66	1	3	9	2.23	18.76	3.77	0.04	0.11	0.4	0.000653775	-3.30358	down
c101155.graph_c0	590	2900	4358	278	693	226	10.86	67.78	89.98	4.34	10.51	4.66	0.00461363	-2.12227	down
c101156.graph_c2	11	19	16	45	38	64	1.19	2.25	1.75	4.39	3.6	7.31	0.00790182	2.07205	up
c101156.graph_c4	122	229	208	466	478	479	3.11	6.35	5.05	10.51	10.45	12.81	0.000957886	1.77499	up
c101168.graph_c0	23	66	52	320	1265	134	0.65	2.02	1.4	8.02	30.6	3.96	3.87012e-06	3.52765	up
c101170.graph_c3	96	2313	2268	60	86	49	2.86	75.39	63.61	1.56	2.16	1.51	0.000195323	-3.51564	down
c101175.graph_c1	31	802	862	18	14	4	2.93	18.07	16.99	0.51	0.25	0.16	2.30429e-05	-4.28062	down
c101180.graph_c0	31	7019	7888	29	17	5	0.67	165.88	163.12	0.56	0.32	0.11	4.28622e-07	-5.88697	down
c101203.graph_c1	4	2020	2402	5	25	7	0.1	40.56	42.11	0.11	0.39	0.18	8.67659e-05	-4.89031	down
c101204.graph_c1	26	2308	3222	21	38	20	0.24	19.75	22.67	0.19	0.3	0.14	3.57538e-05	-4.57305	down
c101206.graph_c1	149	434	465	69	104	81	3.39	12.6	12.64	1.28	2.12	1.81	0.00986498	-1.47288	down
c101219.graph_c0	0	3	7	4894	18686	1804	0	0.08	0.16	104.95	387.97	45.87	2.6197e-31	10.0203	up
c101228.graph_c0	24	7871	12082	11	4	1	0.59	211.36	283.93	0.24	0.08	0.03	9.03578e-09	-6.90608	down
c101239.graph_c0	88	170	107	23	30	17	1.98	4.22	2.31	0.46	0.58	0.41	0.000603274	-1.93986	down
c101241.graph_c1	95	108	98	330	735	183	2.25	2.51	1.87	5.96	13.14	3.98	0.000704841	2.11643	up
c101255.graph_c0	618	696	848	1721	3438	1018	11.91	14.58	15.25	29.19	56.41	20.53	0.00332087	1.6665	up
c101268.graph_c2	817	1380	1325	2324	3966	1942	10.96	20.13	16.91	27.55	45.48	27.32	0.000105546	1.54503	up
c101285.graph_c0	30	41	35	265	646	90	0.53	0.66	0.49	3.65	8.77	1.44	7.52511e-06	3.16828	up
c101287.graph_c0	1	2231	1614	25	28	8	0.02	36.3	27.67	0.34	0.42	0.24	0.00255769	-4.01447	down
c101289.graph_c0	18	107	123	315	789	112	0.32	2.14	2.21	5.57	12.81	2.19	0.00333077	2.45229	up
c101300.graph_c1	71	177	177	492	1041	168	2.63	6.21	5.48	12.96	25.34	5.03	0.00124619	2.16704	up
c101302.graph_c0	23	348	953	8	10	2	0.33	5.73	19.22	0.1	0.12	0.26	8.64073e-06	-4.66638	down
c101302.graph_c1	42	95	298	6	17	5	0.93	2.28	6.28	0.14	0.32	0.12	0.000148608	-3.23037	down
c101324.graph_c1	118	2423	2007	97	126	68	2.04	44.11	27.78	1.08	1.82	1.08	0.0011001	-3.00658	down
c101333.graph_c1	21	65	28	274	699	101	0.65	1.84	0.81	5.52	15.36	2.95	8.93704e-06	3.24911	up
c101335.graph_c0	25	2778	3596	26	26	6	0.56	77.88	91.79	0.58	0.61	0.15	8.75859e-06	-5.0382	down
c101344.graph_c0	85	318	333	450	1357	330	6.11	24.91	22.88	28.9	84.46	24.94	0.0079132	1.80343	up
c101345.graph_c0	142	313	378	999	2588	377	2.5	5.99	6.33	15.55	38.98	6.96	0.00061722	2.36389	up
c101350.graph_c0	342	2332	2520	150	165	219	3.52	26.07	24.79	1.37	1.46	2.36	0.00340194	-2.38317	down
c101352.graph_c3	838	7250	5698	249	463	258	12.78	111.58	78.43	3.24	5.8	3.95	2.52512e-05	-3.04911	down
c101368.graph_c0	134	192	157	460	953	233	4.07	6.35	4.55	12.39	24.86	7.43	0.00144249	1.89526	up
c101374.graph_c0	58	186	135	259	643	182	4.63	16.19	10.31	18.51	44.53	15.29	0.00199789	1.79449	up
c101380.graph_c1	44	475	555	42	55	31	5.91	71.24	74.18	5.44	6.62	4.43	0.00996009	-2.2596	down
c101381.graph_c0	187	187	265	40	55	31	4.37	3.5	4.4	0.62	0.87	0.56	0.000602298	-1.96163	down
c101384.graph_c0	46	1236	988	11	25	19	1.51	44.12	30.88	0.33	0.7	0.65	1.8706e-05	-4.12483	down
c101388.graph_c0	155	625	476	71	124	59	3.29	14.04	9.41	1.31	2.2	1.29	0.00156952	-1.77149	down
c101391.graph_c0	175	288	314	631	1650	260	3.98	7.15	6.8	12.7	32.17	6.21	0.00882482	1.80784	up
c101407.graph_c0	99	161	195	399	635	158	6.72	11.64	12.38	23.17	35.22	10.7	0.0060278	1.61416	up
c101410.graph_c0	63	314	132	841	2965	341	0.84	4.41	1.59	10.86	35.61	5.01	0.000210633	3.03524	up
c101413.graph_c1	24	51	42	77	169	80	1.24	2.87	2.07	3.58	7.53	4.34	0.000651652	1.78909	up
c101421.graph_c1	316	523	608	126	164	112	6.63	12.52	12.64	2.66	3.21	2.86	0.00252455	-1.39834	down
c101428.graph_c0	487	1960	2270	237	310	291	7.77	45.35	43.71	3.48	5.06	5.66	0.00723916	-1.79851	down
c101431.graph_c0	175	3184	4133	101	149	108	1.85	37.21	42.68	0.93	1.33	1.17	0.000382815	-3.32784	down
c101451.graph_c1	499	4100	7680	218	200	233	11.5	79.05	128.08	4.91	3	10.28	0.000312696	-3.19202	down
c101451.graph_c3	49	666	1315	11	29	11	4.56	67.67	117.28	0.93	2.35	1.08	9.03437e-06	-4.20879	down
c101454.graph_c0	37	435	517	34	58	12	0.91	11.97	12.22	0.73	1.23	0.32	0.00787475	-2.49557	down
c101468.graph_c0	288	433	400	709	1675	459	7.96	12.94	10.38	17.04	40.34	13.29	0.00707284	1.51712	up
c101484.graph_c1	24	211	663	2	3	7	0.75	7.11	19.67	0.06	0.08	0.23	2.32269e-05	-4.5474	down
c101495.graph_c0	360	729	796	1072	2284	690	6.89	15.16	14.49	18.13	37.4	13.85	0.00649654	1.38046	up
c101508.graph_c1	344	978	912	50	81	62	7.93	24.14	19.58	1	1.73	1.47	1.98434e-09	-2.93492	down
c101512.graph_c0	16	26	47	119	346	103	1.88	2.21	1.62	12.58	35.97	8.68	4.86456e-06	2.8368	up
c101521.graph_c0	98	498	530	37	79	52	1.41	8.06	8.58	0.46	0.94	0.76	0.00346059	-2.06999	down
c101530.graph_c0	1082	551	550	46	50	55	32.17	17.32	13.26	1.18	1.25	1.74	3.5012e-05	-3.35322	down
c101531.graph_c0	25	33	14	253	319	164	0.36	0.52	0.19	3.19	3.9	2.46	4.19982e-08	3.44321	up
c101546.graph_c0	3	22	17	901	2074	307	0.13	1.03	0.66	33.94	75.22	13.6	1.52383e-17	6.12557	up
c101547.graph_c0	46	1712	2044	44	117	43	0.37	14.7	15.34	0.31	0.79	0.36	0.00261335	-3.17691	down
c101549.graph_c3	73	40	50	5	2	2	6.97	3.37	5.67	0.45	0.1	0.17	0.000238189	-3.50157	down
c101554.graph_c0	163	2676	3476	55	100	28	4.05	71.82	82.28	1.2	2.11	0.73	5.33736e-06	-4.10156	down
c101557.graph_c0	46	129	197	23	22	8	4.02	8.86	10.27	1.84	1.82	0.77	0.00176056	-2.21552	down
c101567.graph_c0	2	1730	1794	24	6	5	0.04	35.34	35.02	0.45	0.11	0.11	0.000867266	-4.38119	down
c101570.graph_c2	61	4016	3748	53	238	54	1.64	140.11	115.62	1.6	5.91	1.94	0.00255221	-3.4012	down
c101594.graph_c2	14	10411	11832	10	58	2	0.66	554.87	544.36	0.86	5.04	0.1	1.02483e-05	-5.67179	down
c101596.graph_c0	53	89	77	305	684	156	1.15	2.1	1.58	5.84	12.68	3.53	1.02456e-05	2.51425	up
c101599.graph_c3	54	813	556	33	65	30	2.09	32.56	18.75	1.1	1.89	1.34	0.00259835	-2.64656	down
c101616.graph_c0	72	78	116	296	1155	159	4.86	5.73	7.47	14.49	52.97	9.38	0.00099095	2.51857	up
c101631.graph_c0	1	0	7	1794	5341	716	0.02	0	0.16	40.03	115.23	19.21	5.61909e-22	8.67611	up
c101644.graph_c0	200	170	109	15	27	21	6.27	5.78	3.24	0.42	0.72	0.69	0.00121749	-2.51782	down
c101645.graph_c0	4	2	0	228	829	169	0.11	0.06	0	6.25	20.07	5.4	9.27509e-14	6.62771	up
c101656.graph_c2	26	1136	1392	5	13	16	0.6	30.27	31.81	0.11	0.26	0.39	2.39169e-05	-4.57878	down
c101661.graph_c0	286	778	942	2143	5579	1032	4.78	20.67	25.69	37.44	80.59	21.5	0.000391695	2.31127	up
c101662.graph_c0	13	1	4	52	216	21	0.39	0.04	0.11	1.41	6.19	0.66	0.0087186	3.08617	up
c101662.graph_c1	14	2	5	48	260	18	0.48	0.09	0.16	1.77	8.61	0.81	0.0087186	3.0573	up
c101681.graph_c0	41	57	70	146	384	61	3.69	6.45	6.14	13.13	30.98	5.9	0.00872654	1.88434	up
c101681.graph_c1	369	561	596	775182	358139	428683	16.26	25.98	24.84	27585	12071.6	17598.2	4.85703e-69	9.95289	up
c101685.graph_c0	91	244	209	342	734	196	3.22	9.52	7.17	10.8	22.89	7.51	0.00737019	1.50536	up
c101686.graph_c0	502	1627	1267	86	313	54	13.45	46.04	31.32	2.04	7.16	1.52	0.00029751	-2.48949	down
c101687.graph_c0	0	32	56	1500	5608	608	0	0.83	1.27	31.54	114.16	15.17	3.66449e-07	5.59092	up
c101695.graph_c0	30	406	344	28	20	20	1.6	23.53	17.45	1.32	0.92	1.12	0.00558955	-2.55465	down
c101713.graph_c1	361	813	999	116	228	136	11.78	29.16	31.31	3.41	6.41	4.71	0.000796192	-1.6851	down
c101716.graph_c1	40	528	593	22	5	18	1.51	21.73	21.33	0.74	0.16	0.71	0.00112735	-3.36153	down
c101720.graph_c1	183	1886	1621	128	131	150	3.45	36.15	30.11	2.78	2.2	2.8	0.00853766	-2.26563	down
c101729.graph_c0	0	30	10	488	1724	162	0	0.57	0.17	7.53	26.25	2.98	7.16044e-07	5.253	up
c101731.graph_c0	1113	2610	2788	389	821	117	20.73	61.54	59.18	6.25	13.29	2.34	0.00679502	-1.92121	down
c101734.graph_c0	118	392	448	1360	3598	599	2.83	11.12	11.18	27.78	75.33	15.05	8.61191e-05	2.69372	up
c101737.graph_c2	17	9	14	78	39	71	1.81	1.04	1.43	7.46	3.62	7.95	0.0082707	2.3756	up
c101750.graph_c0	76	181	175	405	1209	181	2.18	5.74	4.83	10.29	30.01	5.5	0.00188816	2.16742	up
c101756.graph_c2	1	1752	2129	5	26	5	0.05	71.59	72.48	0.14	0.81	0.2	0.000504497	-4.59955	down
c101758.graph_c0	144	371	182	35	48	49	2.03	5.44	2.38	0.41	0.6	0.65	0.00600083	-1.81745	down
c101775.graph_c0	0	9	11	692	2384	385	0	0.31	0.28	16.02	54.15	10.74	5.02453e-17	6.95819	up
c101784.graph_c0	7	52	68	191	793	137	0.14	1.11	1.27	3.29	13.36	2.8	0.000191319	3.19447	up
c101790.graph_c1	164	313	140	588	1719	288	4.13	8.68	3.47	13.24	37.11	7.61	0.00543703	2.09096	up
c101794.graph_c1	33	2327	1467	40	102	34	0.52	44.02	25.02	0.88	2.25	0.56	0.00250842	-3.31563	down
c101799.graph_c1	5	100	98	11920	205	15	0.59	4.29	4.41	554.29	6.62	0.55	0.00202356	4.39625	up
c101809.graph_c0	32	5841	8152	39	89	13	0.22	43.06	52.55	0.23	0.51	0.09	3.17686e-05	-4.90972	down
c101821.graph_c1	40	5402	6535	76	69	94	0.8	62.88	65.3	0.62	0.65	0.91	0.000727483	-3.966	down
c101822.graph_c0	112	502	823	2430	6476	893	21.26	78.98	102.22	187.54	370.2	70.18	0.000488346	2.87298	up
c101824.graph_c2	38	877	565	19	14	13	1.03	26.73	15.29	0.46	0.33	0.38	5.69733e-05	-3.80817	down
c101827.graph_c0	726	2700	3456	324	576	351	12.91	51.5	57.64	5.07	8.81	6.49	0.00263433	-1.85438	down
c101830.graph_c1	42	102	116	19	25	12	1.56	4.13	4.11	0.63	0.8	0.47	0.00325577	-1.71814	down
c101846.graph_c0	57	60	89	7	15	9	1.37	1.49	1.96	0.2	0.34	0.2	0.000819058	-2.28693	down
c101852.graph_c1	2	13	9	50	114	21	0.1	0.71	0.43	2.22	4.94	1.1	0.000144981	3.0422	up
c101860.graph_c0	65	324	353	17	13	6	1.53	7.88	7.3	0.35	0.29	0.15	8.79386e-07	-3.56239	down
c101864.graph_c0	0	0	13	53	582	55	0	0	0.22	0.82	8.73	1.01	0.000669705	4.44898	up
c101880.graph_c0	33	193	463	15	12	3	1.85	11.5	27.47	0.74	0.51	0.49	0.000214578	-3.52959	down
c101883.graph_c2	80	341	398	569	1458	354	4.76	19.62	20.87	23.88	57.05	18.77	0.00980499	1.8269	up
c101888.graph_c0	22	122	118	282	981	152	0.93	6.54	5.16	10.93	36.95	6.91	0.00132828	2.56718	up
c101889.graph_c0	77	402	328	42	62	32	2.13	12.07	8.62	1.03	1.47	0.93	0.00261053	-1.95342	down
c101894.graph_c1	0	116	133	964	2717	291	0	2.93	2.94	19.68	53.67	7.06	0.00669607	3.4847	up
c101908.graph_c1	7	24	14	57	176	27	0.32	1.59	0.58	2.22	6.63	1.24	0.000892819	2.59536	up
c101914.graph_c1	78	176	188	710	2951	499	3.32	8.64	8.18	22.38	88.54	19.96	9.27355e-07	3.2639	up
c101915.graph_c1	146	831	1338	107	164	65	10.89	67.67	95.45	7.14	10.6	5.1	0.0072968	-2.11385	down
c101915.graph_c2	944	4737	5672	618	845	425	16.02	87.19	92.25	9.23	12.03	7.55	0.00352466	-1.9535	down
c101916.graph_c0	153	660	716	69	167	60	1.94	10.62	9.28	0.92	2.27	0.73	0.00529411	-1.83758	down
c101940.graph_c0	27	49	33	154	537	54	0.47	0.92	0.55	2.4	8.13	0.99	0.00100322	2.6728	up
c101947.graph_c0	18	41	52	90	452	56	0.35	0.86	0.98	1.59	7.62	1.13	0.00331671	2.4248	up
c101949.graph_c0	20	111	161	357	1242	163	0.62	3.71	4.74	9.79	32.53	5.27	0.00211357	2.67563	up
c101952.graph_c0	201	232	249	704	1255	363	3.97	4.98	4.68	12.29	21.21	7.52	0.000796039	1.90682	up
c101952.graph_c1	3	2	1	87	307	32	0.15	0.11	0.05	3.97	13.59	1.73	8.28643e-09	5.34147	up
c101957.graph_c0	89	279	299	32	79	19	1.61	9.04	9.82	0.68	1.01	0.35	0.00287442	-1.91253	down
c101978.graph_c2	39	3980	3853	31	55	33	1.05	116.38	98.61	0.74	1.27	0.93	4.09324e-05	-4.50139	down
c101980.graph_c0	30	116	46	196	541	127	0.58	2.44	0.85	3.36	8.95	2.58	0.000792407	2.35067	up
c101991.graph_c0	13	34	10	102	264	33	0.21	0.59	0.15	1.46	3.63	0.56	0.0012963	2.74636	up
c101999.graph_c0	1	4	9	142	320	24	0.03	0.13	0.24	3.58	7.9	0.72	4.06608e-07	4.73851	up
c102011.graph_c2	27	192	249	624	1761	172	0.46	3.59	4.09	9.51	25.95	3.11	0.00727829	2.52382	up
c102013.graph_c0	133	217	201	776	1945	418	4.32	6.72	5.4	17.65	52.62	12.73	4.71615e-06	2.61421	up
c102017.graph_c0	21	127	107	13	11	4	0.99	7.17	4.21	0.51	0.42	0.48	0.00274669	-2.45722	down
c102031.graph_c0	44	54	45	118	235	89	0.55	0.73	0.52	1.24	3.17	1.09	0.00185557	1.80045	up
c102036.graph_c0	19	2300	3189	26	53	13	0.54	26.95	35.89	1.07	1.96	0.18	0.000134855	-4.39568	down
c102036.graph_c1	33	69	30	124	299	55	0.42	0.96	0.37	1.42	3.31	0.74	0.00977016	1.93707	up
c102042.graph_c1	1978	4570	4797	7285	10762	4360	28.17	85.6	100.8	94.89	132.52	65.87	0.00206203	1.34795	up
c102044.graph_c1	20	77	78	176	378	90	0.48	2.57	2.41	5.13	9.58	2.79	0.00100319	2.14572	up
c102054.graph_c0	89	824	1156	77	72	49	1.57	16.23	18.25	1.35	0.95	0.8	0.0035972	-2.51891	down
c102059.graph_c0	1	15	7	63	286	23	0.02	0.31	0.13	1.08	4.7	0.46	0.000157696	3.76074	up
c102071.graph_c1	1509	4753	6165	681	1035	699	20.33	143.31	163.55	8.09	11.92	9.97	0.00195487	-1.77145	down
c102087.graph_c0	33	219	338	11	15	3	0.79	3.14	7.34	0.42	0.41	0.09	5.97167e-05	-3.49639	down
c102088.graph_c0	123	523	666	60	98	52	8.01	15.89	20.64	2.93	6	3.57	0.00185557	-2.02507	down
c102100.graph_c2	70	281	248	41	71	28	2.02	9.81	7.93	1.68	2.93	0.93	0.00985923	-1.58004	down
c102103.graph_c0	55	201	175	6	10	7	2.37	9.98	7.59	0.35	0.37	0.4	2.96664e-08	-3.52621	down
c102103.graph_c1	208	882	1121	66	81	81	3.87	15.63	17.65	1.03	1.13	1.39	0.000237924	-2.51237	down
c102107.graph_c1	122	162	140	381	988	171	2	2.89	2.19	5.54	13.89	2.94	0.0067414	1.89598	up
c102108.graph_c1	48	163	115	355	1138	182	2.14	6.1	3.54	8.51	26.38	6.45	0.000419566	2.48414	up
c102119.graph_c0	122	199	153	336	490	238	2.12	3.75	2.52	5.15	7.29	4.34	0.00204977	1.46187	up
c102127.graph_c0	68	175	121	219	405	140	2.5	6.19	4.57	7.07	11.34	4.83	0.00758749	1.38211	up
c102131.graph_c0	112	75	107	2	4	5	4.79	2.53	1.97	0.32	0.32	0.86	1.19286e-06	-4.03826	down
c102134.graph_c3	107	249	219	441	831	307	2.15	5.27	4.06	7.93	14.28	6.27	5.97167e-05	1.77384	up
c102142.graph_c3	13	795	1136	16	29	3	0.24	18.18	28.29	0.27	1.01	0.11	0.000540689	-4.00287	down
c102149.graph_c1	139	2955	695	33	135	60	3.52	81.92	19.45	0.71	2.92	1.23	0.0020185	-3.08446	down
c102158.graph_c0	749	722	747	2252	2731	1401	11.54	12.09	10.93	30.69	35.93	22.61	0.00354168	1.71422	up
c102166.graph_c1	30	333	574	13	38	8	0.38	4.64	6.97	0.15	0.42	0.11	0.00111236	-3.14432	down
c102173.graph_c2	113	115	149	372	627	277	10.45	11.61	13.2	30.88	50.46	26.97	0.000220156	1.95846	up
c102179.graph_c1	5	2632	3312	15	64	17	0.09	47.51	55.48	0.27	0.9	0.29	0.000892819	-4.21352	down
c102179.graph_c3	71	277	183	33	44	26	3.89	13.76	7.72	1.63	1.81	1.56	0.00222372	-1.80018	down
c102180.graph_c2	40	75	59	10	14	10	5.28	10.64	6.46	1.24	1.57	1.21	0.00296663	-1.87206	down
c102181.graph_c0	69	202	160	565	1225	342	1.98	6.32	4.38	14.42	30.22	10.33	6.89748e-07	2.56273	up
c102187.graph_c1	43	116	123	2	2	1	3.08	18.7	14.28	0.47	0.08	0.05	9.63853e-10	-4.85605	down
c102190.graph_c0	29	107	48	6	11	11	1.36	6.51	2.15	0.25	0.45	0.59	0.00981159	-2.0459	down
c102193.graph_c1	348	986	1240	204	240	163	4.74	14.6	16.01	2.46	2.78	2.31	0.00579001	-1.51889	down
c102196.graph_c4	15	40	37	118	128	42	1.9	5.49	4.35	13.04	13.83	5.46	0.00182582	1.95678	up
c102202.graph_c2	101	602	726	86	69	51	4.48	29.34	30.98	3.39	2.63	2.38	0.00846449	-2.0395	down
c102203.graph_c0	26	1612	2119	35	76	12	0.57	101.33	105.3	0.51	1.1	0.22	0.000976534	-3.72654	down
c102208.graph_c1	29	2030	1159	34	70	32	2	23.01	9.66	0.61	0.93	1.34	0.00184978	-3.38014	down
c102211.graph_c2	1468	12170	14678	452	642	870	27.39	228.41	247.63	7.4	9.67	17.63	0.00101622	-2.84421	down
c102215.graph_c0	268	2584	3469	195	445	168	4.7	37.73	40.21	3.82	8.02	3.69	0.00996009	-2.2453	down
c102217.graph_c1	42	67	99	182	412	88	1.02	1.77	2.28	4.1	8.95	2.29	0.00315991	1.88601	up
c102219.graph_c0	26	101	87	228	423	114	0.73	3.11	2.34	5.71	10.25	3.38	0.000452244	2.1356	up
c102225.graph_c0	106	219	209	438	964	295	1.67	4.28	3.63	7.19	15.43	5.18	7.62891e-05	1.92384	up
c102229.graph_c0	43	33	41	230	112	211	0.99	0.95	0.99	5.32	2.44	5.68	0.00252121	2.45956	up
c102232.graph_c0	236	754	357	1731	4808	706	21.12	73.53	30.58	138.86	373.26	66.37	0.000561568	2.51297	up
c102232.graph_c2	53	111	74	291	679	74	15.27	35.17	20.76	78.32	178.07	22.66	0.00625983	2.16225	up
c102233.graph_c1	29	30	40	134	373	59	1.11	1.25	1.45	4.53	12.2	2.36	0.000690243	2.48046	up
c102244.graph_c0	0	12	10	367	1121	164	0	0.47	0.34	11.63	34.44	6.19	1.27412e-11	5.87115	up
c102246.graph_c2	46	44	75	3	14	3	1.56	0.91	2.03	0.06	0.23	0.06	0.00136359	-2.63506	down
c102252.graph_c2	198	1138	1064	140	166	117	5.42	31.2	26.93	3.66	4.18	3.5	0.00880966	-1.81756	down
c102270.graph_c1	633	1147	1345	288	475	268	28.3	55.23	54.48	14.65	19.11	14.81	0.0072968	-1.17519	down
c102272.graph_c1	85	324	307	465	1189	300	1.66	7.01	5.91	8.24	20.32	6.27	0.00733856	1.73758	up
c102281.graph_c0	85	148	91	730	4272	433	1.26	2.58	2.21	16.94	90.92	11.8	3.01573e-06	3.78297	up
c102284.graph_c1	68	95	106	227	285	145	2.51	2.88	3.56	5.7	7.32	4.32	0.000917015	1.59461	up
c102285.graph_c0	33	1939	2689	34	95	18	0.23	15.09	18.3	0.22	0.58	0.14	0.000690243	-3.78957	down
c102287.graph_c0	314	553	489	144	158	52	14.13	27.06	21.18	5.81	6.14	2.45	0.00678262	-1.55525	down
c102300.graph_c0	61	699	1094	32	70	42	2.76	34.43	47.15	1.29	2.72	1.99	0.00255769	-2.77992	down
c102300.graph_c2	156	2167	2847	86	113	72	6.12	92.39	106.26	3	3.81	2.97	0.00022809	-3.27289	down
c102309.graph_c0	54	9237	11351	112	291	60	0.73	135	144.85	1.33	3.35	0.85	0.000669705	-4.04198	down
c102311.graph_c1	32	78	118	170	217	116	1.48	3.8	5.06	6.9	8.18	5.28	0.00658417	1.55291	up
c102314.graph_c0	3	617	807	11	36	5	0.08	16.57	18.94	0.24	0.77	0.13	0.00645201	-3.4464	down
c102325.graph_c3	11	39	27	379	67	104	0.21	0.82	0.59	7.73	1.2	2.54	0.000773632	3.0975	up
c102332.graph_c0	33	779	176	21	40	19	5.5	42.89	22.95	3.35	5.02	1.74	0.00823593	-2.67725	down
c102337.graph_c0	75	138	85	16	33	18	3.39	6.65	3.7	0.74	1.53	0.83	0.00474837	-1.73887	down
c102344.graph_c0	318	1146	1443	141	125	144	10.22	28.89	31.85	2.59	2.16	3.36	0.00205703	-2.08734	down
c102359.graph_c0	528	56	220	3634	9874	1650	12.46	1.59	5.21	68.12	185.31	37.9	0.00119586	3.44903	up
c102361.graph_c2	39	40	68	261	1131	190	1.67	1.81	3.38	8.48	35.46	7.39	4.95722e-06	3.31534	up
c102370.graph_c0	38	46	69	107	346	111	1.23	1.9	2.31	3.32	10.6	3.87	0.0012954	2.03097	up
c102379.graph_c1	17	66	15	170	377	71	1.08	4.51	0.73	5.86	12.3	2.88	0.000826022	2.72587	up
c102384.graph_c0	154	209	263	17	36	21	1.59	2.35	2.58	0.15	0.32	0.23	7.2344e-07	-2.6378	down
c102390.graph_c1	48	4272	3735	48	83	38	1.44	436.27	383.95	1.02	1.62	0.78	0.000119719	-4.18106	down
c102392.graph_c4	5	18	13	35	61	23	0.92	3.63	2.31	5.89	9.98	4.48	0.00252455	2.01999	up
c102403.graph_c0	0	56	68	388	1117	169	0	1.35	1.43	7.71	21.5	3.97	0.00377468	3.45553	up
c102408.graph_c0	90	174	76	18	21	23	1.54	3.24	1.23	0.27	0.31	0.41	0.00956768	-1.90413	down
c102414.graph_c1	105	231	147	783	2958	311	1.96	4.71	2.71	15.82	49.06	9.62	0.000113589	2.98447	up
c102423.graph_c0	173	252	258	1241	4376	523	2.7	4.26	3.82	17.05	58.2	8.55	2.45317e-05	3.07232	up
c102424.graph_c0	247	1107	1298	129	177	109	5.32	38.55	41.15	3.61	2.74	2.31	0.00143826	-2.03067	down
c102433.graph_c0	45	328	298	25	44	28	2.85	23.52	18.77	1.42	2.47	1.91	0.00755309	-2.06877	down
c102433.graph_c1	80	345	412	40	45	37	3.85	18.54	19.05	1.74	1.84	1.98	0.00212131	-2.08119	down
c102447.graph_c0	0	1	1	1879	5090	597	0	0.02	0.02	34.95	92.79	13.18	4.99145e-30	10.0537	up
c102455.graph_c0	3	3137	3102	13	25	6	0.11	125.92	109.33	0.42	0.78	0.23	7.95226e-05	-4.97767	down
c102455.graph_c1	726	4636	6484	488	491	406	7.32	44.12	54.51	4.28	4.72	4.64	0.00338072	-2.29096	down
c102460.graph_c2	65	1228	1507	51	85	79	1.7	33.63	40.63	1.13	1.88	2.22	0.00741533	-2.66509	down
c102472.graph_c0	181	344	376	50	83	49	3.27	6.76	6.48	0.8	1.28	0.93	3.59623e-05	-1.85577	down
c102474.graph_c0	239	366	271	834	1310	528	2.59	4.31	2.79	7.98	12.13	6	0.000181139	1.84174	up
c102503.graph_c1	36	2847	3283	39	144	25	0.83	71.51	72.31	0.79	2.83	0.6	0.00128911	-3.69339	down
c102503.graph_c2	12	869	978	16	38	11	0.5	39.2	38.6	0.59	1.35	0.48	0.00127933	-3.61434	down
c102508.graph_c0	0	15	16	64	209	34	0	0.41	0.38	1.4	4.43	0.87	0.00139951	3.25447	up
c102511.graph_c0	21	1148	1398	15	21	18	0.73	36.16	37.16	0.42	0.67	0.78	0.000126213	-4.12088	down
c102528.graph_c0	43	129	127	183	525	119	1.67	3.89	3.4	4.43	12.09	3.31	0.00901632	1.70609	up
c102542.graph_c0	121	615	598	20	56	22	4.11	24.29	19.69	0.58	1.83	0.71	2.57104e-06	-3.1206	down
c102542.graph_c3	94	146	194	10	47	8	2.55	4.34	5.13	0.24	1.1	0.24	0.00133846	-2.38451	down
c102548.graph_c0	14	36	43	280	1285	119	0.31	0.87	0.9	5.46	24.32	2.75	5.80892e-07	3.99983	up
c102555.graph_c0	13	5539	8836	8	89	3	0.18	87.9	119.02	0.1	1.08	0.05	0.000173525	-4.95558	down
c102557.graph_c0	172	437	355	962	1643	489	4.36	12.06	8.57	21.6	35.72	13.01	6.76451e-05	1.97136	up
c102562.graph_c0	9	3208	4694	27	56	3	0.28	70.46	87.42	0.46	0.91	0.07	0.000331334	-4.60012	down
c102587.graph_c0	19	18	23	90	160	50	0.8	0.79	0.88	3.33	5.7	2.11	9.18053e-05	2.43272	up
c102592.graph_c2	67	75	56	12	8	1	5.82	7.11	4.66	0.94	0.6	0.09	0.00241036	-2.73258	down
c102593.graph_c3	74	321	358	38	60	21	2.23	10.45	10.1	1.02	1.51	0.68	0.00151612	-2.09071	down
c102601.graph_c0	139	699	743	69	127	75	2.18	11.78	11.49	0.94	1.73	1.44	0.00492212	-1.90447	down
c102602.graph_c2	25	1345	1460	30	19	13	0.87	46.91	44.62	0.96	0.56	0.51	0.000153857	-4.07988	down
c102612.graph_c0	28	485	757	7	18	25	0.72	14.43	21.3	0.25	0.3	1.02	0.00149338	-3.36393	down
c102614.graph_c0	319	12009	10571	302	495	274	10.04	306.06	247.39	9.53	14.06	13.77	0.00101622	-3.31442	down
c102615.graph_c0	28	106	88	394	873	271	0.65	2.7	1.94	8.13	17.46	6.67	1.22445e-08	3.06364	up
c102622.graph_c3	116	1264	1199	94	156	68	2.4	23.66	18.97	2.58	4.22	2.07	0.0067231	-2.27275	down
c102632.graph_c0	21	109	147	12	12	10	2.23	12.94	16.64	1.42	1.12	1.17	0.00544624	-2.25318	down
c102634.graph_c0	94	322	191	39	53	33	1.9	7.11	3.65	0.67	0.88	0.66	0.00215139	-1.73832	down
c102644.graph_c0	181	537	505	118	107	64	6.54	27.45	17.25	4.49	4.36	3.18	0.00575482	-1.53631	down
c102653.graph_c0	21	7002	9082	100	277	42	0.46	77.87	89.18	0.9	2.41	0.45	0.00280711	-3.77906	down
c102657.graph_c0	33	9	14	89	262	70	0.69	0.2	0.28	1.64	4.68	1.53	0.00837309	2.53299	up
c102659.graph_c1	23	4971	6017	112	303	43	0.53	73.96	79.22	1.71	4.39	0.75	0.0087016	-3.30887	down
c102669.graph_c0	34	89	58	7	13	13	0.64	1.82	1.04	0.12	0.21	0.26	0.00960566	-1.86371	down
c102672.graph_c0	0	0	0	265	663	84	0	0	0	5.9	14.44	2.25	7.64283e-16	8.42854	up
c102675.graph_c1	97	91	909	13	28	31	3.61	4.06	36.87	0.43	0.89	1.21	0.00615559	-2.88187	down
c102675.graph_c3	39	74	478	12	9	13	1.9	3.93	22.26	0.52	0.38	0.67	0.00319798	-3.0129	down
c102690.graph_c0	201	181	141	34	15	27	2.55	1.71	1.42	0.48	0.18	0.51	0.00853766	-2.22586	down
c102692.graph_c0	23	69	77	132	372	78	0.7	2.1	2.6	3.58	9.75	2.35	0.00314711	1.99569	up
c102693.graph_c0	634	1993	2121	5229	10841	3092	14.93	51.03	47.54	108.96	218.67	76.4	2.31982e-05	2.3085	up
c102708.graph_c0	76	277	188	420	1307	324	2.16	8.96	5.37	10.45	28.72	9.15	0.000704841	2.15292	up
c102709.graph_c0	30	214	268	17	18	17	0.63	4.42	5.07	0.26	0.35	0.39	0.00336324	-2.44573	down
c102714.graph_c0	16	5132	5110	31	95	4	0.86	165.21	154.18	1.41	3.2	0.25	0.000401495	-4.50816	down
c102727.graph_c0	176	355	387	1290	4168	622	4.16	10.01	8.7	32.07	105.99	17.79	3.39469e-05	2.77937	up
c102738.graph_c0	3	54	58	10908	30699	4072	0.06	1.19	1.12	196.25	534.7	86.92	7.66843e-22	8.01658	up
c102745.graph_c2	1171	7274	10155	813	1096	628	37.06	253.24	309.68	23.01	30.05	21.01	0.00447936	-2.15322	down
c102748.graph_c1	164	283	357	49	89	57	10.15	19.78	18.38	2.75	4.64	3.79	0.00183151	-1.58581	down
c102755.graph_c0	24	265	330	25	22	15	2.42	29.22	31.95	2.27	1.94	1.6	0.00794537	-2.43178	down
c102760.graph_c0	326	1665	1794	160	138	180	13.51	32.34	31.85	6.75	4.8	7.89	0.00385367	-2.16542	down
c102773.graph_c1	14	4147	5737	62	180	26	0.36	78.87	97.11	0.98	3.02	0.53	0.00307219	-3.74501	down
c102775.graph_c1	34	489	471	12	29	21	0.58	8.73	7.29	0.16	0.37	0.33	0.0010059	-3.02766	down
c102776.graph_c2	626	1268	1348	298	304	267	10.23	28.42	25.68	4.22	4.38	4.55	0.00733856	-1.37165	down
c102781.graph_c1	220	257	239	584	764	433	4.82	6.12	4.98	11.32	14.34	9.95	0.00351124	1.56601	up
c102791.graph_c1	191	304	214	2314	4069	1386	4.85	8.4	5.18	52.06	88.62	36.95	9.97713e-15	3.60344	up
c102796.graph_c0	124	204	442	45	36	47	4.21	8.47	16.67	1.4	1.05	1.67	0.00958367	-1.90403	down
c102800.graph_c0	22	508	360	17	17	3	0.26	6.65	4.12	0.18	0.17	0.04	0.000552569	-3.51736	down
c102802.graph_c0	19	39	28	404	1125	129	1.32	3.14	2.11	21.87	62.47	8.24	5.86742e-09	4.1402	up
c102803.graph_c0	5	912	1569	16	48	12	0.1	20.03	30.07	0.29	0.83	0.26	0.00346444	-3.6229	down
c102808.graph_c0	2	7010	8033	26	32	3	0.22	441.86	441.53	1.28	1.65	0.1	0.000117153	-5.15493	down
c102813.graph_c0	293	21	115	2	9	7	2.38	0.19	3.35	0.01	0.1	0.1	0.00105493	-3.79777	down
c102815.graph_c0	44	2408	2515	53	81	30	1.14	61.3	53.25	1.03	1.55	0.76	0.000489383	-3.71076	down
c102818.graph_c0	2	22	54	67	1058	24	0.02	0.19	0.4	0.52	8.34	0.19	0.00995824	3.26143	up
c102836.graph_c0	195	1107	2846	36	9	5	8.97	57.79	115.95	1.9	0.19	0.38	5.81685e-07	-4.93807	down
c102839.graph_c1	56	192	157	235	377	227	2.4	7.41	5.32	6.59	6.4	8.68	0.00451206	1.49334	up
c102847.graph_c0	55	102	76	485	1014	179	1.6	3.23	2.14	12.54	25.37	5.47	3.15534e-06	2.91699	up
c102851.graph_c0	116	285	375	57	82	18	1.59	2.14	2.46	0.35	0.49	0.31	0.00542753	-1.8499	down
c102859.graph_c0	16	26	29	45686	112781	14744	0.97	1.63	1.55	2377.96	5847.76	907.61	4.68503e-66	10.7131	up
c102860.graph_c3	91	2827	3217	56	27	52	4.78	162.21	163.59	2.65	1.25	2.87	0.000105546	-4.03232	down
c102877.graph_c0	21	96	109	6	2	2	1.41	6.55	7.21	0.34	0.12	0.14	7.04479e-05	-3.51652	down
c102885.graph_c0	116	139	130	2333	7856	973	3.79	4.9	3.85	40.68	128.68	20.13	3.2161e-11	4.60013	up
c102909.graph_c2	177	802	583	86	62	35	4.34	21.51	13.22	1.65	1.43	0.98	0.000258675	-2.42288	down
c102911.graph_c0	264	661	738	2087	4626	1151	5.08	13.78	13.47	36.23	77.25	23.35	4.0291e-06	2.47921	up
c102913.graph_c0	24	1454	2524	71	60	32	0.52	34.97	52.07	1.31	1.11	0.74	0.00384296	-3.31912	down
c102916.graph_c0	43	365	390	37	18	15	1.72	15.86	14.85	1.31	0.62	0.63	0.00349887	-2.59765	down
c102926.graph_c1	22	2067	2718	9	18	14	1.14	48.42	57.13	0.45	0.25	1.64	4.06761e-06	-5.08209	down
c102932.graph_c0	40	93	92	140	461	100	1.08	2.59	2.2	4.09	9.92	3.38	0.00557907	1.8186	up
c102940.graph_c0	35	56	155	9	13	10	3.68	7.29	17.34	0.84	1.27	1.14	0.00397058	-2.27842	down
c102943.graph_c1	177	154	152	494	977	262	3.32	3.13	2.7	8.15	15.62	5.16	0.00643308	1.86762	up
c102956.graph_c0	236	750	881	73	230	74	4.82	15.26	14.97	1.32	3.74	1.36	0.00394949	-1.84264	down
c102975.graph_c0	44	4951	8127	63	99	73	2.06	108.6	120.94	4.53	10.08	1.97	0.000276854	-4.1974	down
c102996.graph_c3	97	404	450	66	53	46	2.3	9.4	8.65	1.15	1.29	1.05	0.00754678	-1.83627	down
c102997.graph_c0	287	343	249	1810	4310	764	7.74	7.73	5.31	34.8	77.69	18.5	2.00039e-05	2.90311	up
c103025.graph_c1	8	10	9	33	136	26	1.23	1.69	1.34	4.62	18.49	4.23	0.000492618	2.77516	up
c103026.graph_c2	230	1380	1985	168	267	109	5.03	32.71	40.5	3.26	5.01	2.51	0.00736267	-2.06271	down
c103031.graph_c0	6	653	1272	27	39	3	0.2	16.22	25.21	0.49	0.73	0.07	0.0072968	-3.42329	down
c103040.graph_c1	20	6216	8539	62	163	21	0.22	73.02	87.73	0.59	1.5	0.24	0.000605892	-4.26983	down
c103059.graph_c0	33	3763	4328	58	47	57	0.35	43.7	44.06	0.54	0.43	0.64	0.000480999	-4.01894	down
c103062.graph_c0	936	20909	19608	882	1668	938	10.83	252.41	206.8	8.69	15.8	11.09	0.00637045	-2.63896	down
c103067.graph_c1	66	917	1077	50	30	66	2.11	23.72	29.04	1.02	0.9	1.91	0.00827426	-2.66062	down
c103068.graph_c1	82	224	134	32	25	20	1.81	5.01	2.37	0.52	0.48	0.39	0.00159866	-1.94601	down
c103084.graph_c1	4	21	26	96	123	44	0.73	4.22	4.61	16.11	20.05	8.54	0.00012221	2.67213	up
c103087.graph_c2	22	25	38	220	599	106	0.43	0.54	0.73	3.84	10.12	2.19	2.59748e-07	3.41199	up
c103089.graph_c0	1	18	6	36	147	16	0.11	2.24	0.76	3.78	14.56	1.93	0.0048962	2.90829	up
c103089.graph_c1	6	27	39	145	318	49	0.12	0.58	0.73	2.53	5.4	1.01	0.000210633	2.94661	up
c103092.graph_c0	68	559	479	50	56	43	1.11	12.82	7.18	0.73	1.11	0.98	0.00731701	-2.11263	down
c103101.graph_c2	607	1181	1069	2168	2773	1555	18.64	39.96	31.54	58.73	72.5	49.84	6.06453e-05	1.55917	up
c103104.graph_c2	7	7817	8825	24	27	0	0.18	199.6	198.95	0.52	0.57	0	0.000264895	-5.07551	down
c103107.graph_c2	17	25	2	82	301	133	0.27	0.43	0.03	1.14	4.04	2.19	0.000741644	3.2934	up
c103109.graph_c0	2	2	4	244	602	75	0.37	0.4	0.71	40.98	98.18	14.59	1.52113e-14	6.27422	up
c103109.graph_c1	413	1537	1396	2691	7219	1110	16.59	66.18	53.27	53.96	140.12	26.39	0.00945947	1.9137	up
c103112.graph_c0	342	164	84	5	8	20	8.39	4.57	1.96	0.12	0.21	0.82	0.00171007	-3.35335	down
c103114.graph_c0	208	1109	1398	132	148	87	4.58	28	29.04	2.46	2.89	2.08	0.00190192	-2.18956	down
c103119.graph_c2	192	570	753	66	74	87	9.83	31.81	36.82	3.01	3.27	4.73	0.00229717	-2.02944	down
c103127.graph_c0	37	1381	2097	10	12	34	0.76	32.98	42.68	0.19	0.22	0.76	0.000214578	-4.19912	down
c103138.graph_c0	68	66	93	306	382	189	5.34	5.67	7	21.33	25.98	15.6	7.20701e-05	2.16758	up
c103143.graph_c0	253	731	908	117	204	117	3.54	10.92	11.99	1.51	2.46	1.77	0.00391864	-1.5783	down
c103147.graph_c0	4	9	1	36	125	21	0.35	0.86	0.08	2.81	9.47	1.93	0.000303713	3.42965	up
c103148.graph_c2	40	108	100	10	6	15	6.95	19.36	15.92	1.6	0.9	2.76	0.00649654	-2.20325	down
c103151.graph_c0	80	256	354	555	975	265	4.15	10.16	13.65	16.47	25.98	9.03	0.00930385	1.70165	up
c103171.graph_c0	61	197	100	21	24	21	2.88	10.02	4.35	0.84	0.96	1.08	0.00470163	-1.84549	down
c103179.graph_c0	0	32	34	327	552	81	0	1.07	0.7	6.27	10.24	2.46	0.0008521	3.67951	up
c103180.graph_c1	74	1935	2632	82	213	23	0.73	62.81	74.98	0.68	1.79	0.22	0.00706636	-2.96169	down
c103194.graph_c0	420	767	709	1140	2167	669	11.52	25.41	21.04	24.13	46.54	17.67	0.00726617	1.32715	up
c103197.graph_c0	27	247	487	9	11	11	0.84	7.42	15.75	0.26	0.33	0.41	0.000181627	-3.50889	down
c103202.graph_c0	78	254	99	566	1874	224	1.64	5.77	1.97	10.48	33.53	4.91	0.00110205	2.62897	up
c103204.graph_c0	25	98	479	6	17	17	5.07	14.77	27.38	0.82	2.28	3.13	0.00887044	-2.81538	down
c103214.graph_c1	65	351	473	32	26	31	2.88	10.38	7.72	0.95	0.58	0.85	0.00184185	-2.46524	down
c103218.graph_c1	412	807	629	166	299	133	8.81	22.88	16.82	4.08	6.9	3.34	0.00538656	-1.25573	down
c103229.graph_c0	37	1528	1770	51	96	9	3.15	143.83	145.23	3.94	7.22	0.82	0.00322138	-3.33903	down
c103229.graph_c2	51	2210	2284	71	124	32	3.16	149.03	135	3.92	6.63	2.08	0.0021392	-3.26759	down
c103241.graph_c1	29	59	32	77	169	72	0.59	1.31	0.62	1.4	2.96	1.54	0.00555779	1.66125	up
c103249.graph_c0	129	349	321	692	1054	310	2.72	8.3	6.46	13.67	21.21	7.48	0.00175811	1.6803	up
c103250.graph_c0	9	1081	2388	34	88	18	0.22	28.81	55.41	0.73	1.84	0.46	0.00716756	-3.34443	down
c103253.graph_c0	35	1713	2199	31	107	35	0.33	17.31	19.43	0.25	0.85	0.34	0.00203899	-3.3918	down
c103254.graph_c0	681	505	374	3897	9442	1655	10.86	9.54	4.44	65.02	145.56	33.26	0.000134855	3.01361	up
c103270.graph_c1	297	133	193	37	29	20	21.42	7.4	8.52	1.44	1.09	0.94	0.00326017	-2.47892	down
c103271.graph_c0	312	3637	5820	21	63	73	5.61	70.25	93.97	0.62	0.9	1.36	9.01683e-07	-4.60561	down
c103279.graph_c0	41	7423	10570	64	250	48	0.67	155.23	219.67	0.91	3.69	1.07	0.000581403	-4.15263	down
c103281.graph_c0	156	270	222	628	1421	289	6.41	11.67	8.37	22.62	49.32	12.03	0.00117536	1.98145	up
c103293.graph_c0	243	343	176	2713	7953	1075	7.23	11.12	4.99	71.54	203.04	33.59	3.62097e-07	3.74044	up
c103294.graph_c1	13	37	37	152	378	78	0.97	3.01	2.64	10.19	24.41	6.11	2.41959e-06	2.95781	up
c103294.graph_c8	622	1684	2245	237	229	254	14.32	42.16	49.18	4.84	4.51	6.13	0.00143826	-1.98249	down
c103298.graph_c2	14	35	41	77	188	39	0.89	2.42	2.49	4.36	10.36	2.6	0.00394949	1.95601	up
c103303.graph_c1	0	107	160	1626	5332	567	0	5.18	7.08	37.63	115.32	15.42	0.00122981	4.07902	up
c103303.graph_c2	120	526	480	976	1411	774	4.72	20.52	16.7	29.13	40.86	28.34	0.000666905	1.93562	up
c103306.graph_c0	91	187	168	411	839	185	3.92	10.58	7.76	19.15	37.02	7.69	0.00117536	1.88513	up
c103316.graph_c0	49	5092	8673	12	47	17	3	205.11	282.34	0.75	2.93	1.54	4.15886e-07	-5.63489	down
c103318.graph_c0	78	910	1531	51	33	31	3.98	33.26	48.76	1.94	1.08	1.15	0.00032367	-3.35848	down
c103335.graph_c0	88	2129	82	31	19	27	1.68	48.55	1.52	0.52	0.31	0.59	0.00380958	-3.40925	down
c103339.graph_c1	2273	1925	2940	554	483	368	156.47	53.58	127.75	17.73	23.85	22.5	0.00220694	-1.92661	down
c103346.graph_c0	334	62	26	1988	1126	2846	15.82	3.15	1.2	87.87	48.42	144.89	0.00738042	3.21379	up
c103351.graph_c0	205	370	450	714	1238	358	5.24	10.27	10.65	16.5	29.13	10.06	0.00635741	1.44242	up
c103356.graph_c0	7	24	16	111	9419	19	0.18	0.46	0.22	1.07	208.06	0.47	2.84396e-05	5.44391	up
c103362.graph_c0	534	961	821	1523	2904	939	5.61	10.86	8.03	13.94	23.97	10.53	0.00234517	1.46415	up
c103368.graph_c0	44	335	419	21	46	19	0.54	4.32	5.54	0.21	1.38	0.23	0.00222243	-2.49108	down
c103373.graph_c0	25	1375	1751	5	13	9	0.51	30.44	33.95	0.09	0.23	0.19	9.43275e-07	-5.18637	down
c103383.graph_c1	37	95	109	12	9	15	5.19	14.58	14.71	1.53	1.11	2.22	0.00650515	-2.0273	down
c103383.graph_c2	64	258	296	17	35	34	6.25	27.48	27.69	1.49	2.98	3.49	0.00439276	-2.11597	down
c103383.graph_c3	290	602	687	74	150	97	6.1	26.14	29.78	2.25	4.81	3.75	0.000331334	-1.80844	down
c103383.graph_c4	66	263	318	44	36	18	4.11	17.83	18.9	2.44	1.94	1.18	0.00326607	-2.0744	down
c103385.graph_c0	16	2763	4100	55	175	18	0.18	33	42.84	0.53	1.64	0.21	0.0058002	-3.48484	down
c103396.graph_c1	51	1174	901	9	13	36	1.1	30.3	17.39	0.2	0.43	0.88	0.000600595	-3.68251	down
c103400.graph_c2	6	20	15	506	1097	75	0.1	0.36	0.24	7.39	15.52	1.32	7.78722e-10	5.05968	up
c103407.graph_c0	190	303	240	483	1186	429	2.67	4.65	3.22	6.01	14.26	6.33	0.00103461	1.72469	up
c103415.graph_c0	5	41	65	217	509	51	0.14	1.21	1.68	5.23	11.85	1.45	0.00322138	2.83965	up
c103431.graph_c1	78	88	96	2	15	1	4.56	5.46	4.73	0.08	0.58	0.06	0.000127177	-3.42008	down
c103432.graph_c0	0	23	57	492	1842	181	0	0.55	1.15	8.55	30.76	3.59	0.000183747	4.35838	up
c103434.graph_c0	135	187	199	923	3127	396	1.52	2.27	2.12	9.21	30.13	4.66	2.84123e-05	3.00966	up
c103454.graph_c0	344	973	1004	134	221	125	7.12	27.55	20.84	3.51	4.61	2.33	0.0002103	-1.76221	down
c103459.graph_c3	189	506	505	80	151	47	5.94	15.28	14.48	2.25	4.1	1.6	0.0012954	-1.68635	down
c103459.graph_c4	149	336	446	51	131	26	4.36	10.71	12.46	1.32	3.29	0.8	0.00731749	-1.77895	down
c103469.graph_c1	35	117	133	373	909	132	0.71	2.58	2.57	6.71	15.8	2.81	0.000787384	2.45966	up
c103484.graph_c1	151	781	1403	44	83	85	4.09	9.94	13.47	1.01	1.85	2.41	0.00221543	-2.57777	down
c103487.graph_c0	2	42	47	7247	19745	2765	0.01	0.33	0.36	53.81	141.36	23.82	2.79682e-20	7.76316	up
c103491.graph_c1	214	123	154	1980	6754	861	11.46	6.44	7.1	77.25	307.18	52	2.14097e-06	3.86128	up
c103496.graph_c0	20	462	457	18	20	19	1.21	15.59	12.14	0.74	0.68	0.94	0.0031611	-2.94544	down
c103508.graph_c0	55	1103	343	18	37	15	10.11	30.28	15.15	2.05	2.05	2.42	0.000201431	-3.44846	down
c103520.graph_c5	6	827	1202	23	33	14	0.58	74.47	94.85	1.74	2.42	1.21	0.0037755	-3.47555	down
c103520.graph_c6	0	2	0	109	657	72	0	0.16	0	7.1	44.87	5.85	4.30805e-12	7.09464	up
c103521.graph_c0	66	366	455	1078	2582	516	2.33	14.04	15.34	33.84	78.39	19.17	0.00141728	2.45926	up
c103523.graph_c0	462	1152	1249	2569	6889	1208	9.75	29.1	24.15	49.86	125.58	28.32	0.00154324	2.0694	up
c103525.graph_c0	49	99	77	11	27	15	1.7	3.8	2.52	0.35	0.81	0.55	0.00806319	-1.64456	down
c103533.graph_c4	244	3177	2312	118	152	119	2.42	33.49	21	0.98	1.31	1.38	0.00037155	-2.95861	down
c103539.graph_c0	130	369	262	636	1327	325	5.57	18.06	11.63	24.27	48.77	14.66	0.00133769	1.84032	up
c103553.graph_c0	27	57	43	363	970	125	0.59	1.33	0.9	7.04	18.03	2.87	4.90328e-07	3.48753	up
c103556.graph_c0	171	882	994	2123	6047	733	1.84	10.33	10.17	20.17	55.59	8.27	0.00753454	2.26299	up
c103557.graph_c0	127	184	169	275	657	237	3.01	5.03	4.24	7.73	15.26	6.33	0.005445	1.49472	up
c103580.graph_c0	0	5	20	101	736	123	0	0.26	0.98	6.73	57.61	14.04	1.08992e-05	4.71495	up
c103583.graph_c0	174	749	1057	126	174	48	5.48	26.48	24.46	2.24	3.64	1	0.00921663	-1.93209	down
c103590.graph_c0	532	876	842	1426	2788	2059	11.07	19.82	16.67	26.24	49.66	44.93	0.000466625	1.8287	up
c103601.graph_c0	7	103	67	501	357	272	0.11	1.7	0.96	7.55	6.47	4.45	0.000325556	3.05479	up
c103604.graph_c0	142	228	319	48	69	47	3.53	6.17	7.55	1.06	1.47	1.23	0.00199789	-1.60037	down
c103610.graph_c0	370	1777	2329	233	288	190	6.92	28.88	30.56	3.43	3.83	3.84	0.00421376	-1.97229	down
c103613.graph_c2	197	598	572	65	127	67	5.58	31.27	25.72	2.08	3.02	2.25	0.000196557	-1.8889	down
c103623.graph_c2	859	784	1377	24145	17727	30838	12.91	37.57	37.43	298.76	161.91	425.47	4.42396e-13	4.76846	up
c103624.graph_c0	196	488	578	97	148	69	8.23	24.85	25.44	4.02	5.06	2.43	0.00158563	-1.53537	down
c103630.graph_c0	20	55	29	176	577	61	0.43	1.29	0.6	3.37	10.68	1.38	0.000271725	2.91781	up
c103635.graph_c0	559	4270	6014	419	693	288	5.92	50.39	60.14	3.92	6.39	3.29	0.00581274	-2.24137	down
c103636.graph_c0	894	3058	1935	409	568	300	14	50.01	27.75	5.6	6.99	4.57	0.00065861	-1.69312	down
c103649.graph_c0	174	322	248	407	1722	439	5.08	10.01	6.36	9.81	39.31	11.75	0.00429602	1.90377	up
c103665.graph_c0	24	169	172	12	32	7	0.36	3.77	2.49	0.16	0.41	0.12	0.00931961	-2.2197	down
c103667.graph_c0	100	1609	2090	21	40	6	6.23	108.55	119.9	1.04	2.16	0.35	4.22293e-07	-4.71735	down
c103678.graph_c0	14	9742	8529	55	57	25	0.46	194.33	161.02	1.21	1.08	0.89	5.41583e-05	-4.95819	down
c103680.graph_c0	1	8	2	709	2094	258	0.02	0.17	0.04	11.9	34.03	5.14	7.23438e-20	7.4652	up
c103689.graph_c1	3	7	6	106	587	42	0.07	0.17	0.13	2.05	14.08	0.97	2.33911e-08	4.99295	up
c103712.graph_c3	40	85	86	365	1188	166	2.6	6.02	5.34	21.16	66.76	11.34	9.80782e-06	3.04511	up
c103733.graph_c2	8	12	13	28	135	19	0.33	0.54	0.51	1.03	4.79	0.82	0.00543637	2.39239	up
c103742.graph_c3	842	3129	909	357	254	191	19.8	63.27	17.54	11.52	5.76	3.85	0.00886787	-1.96723	down
c103763.graph_c0	49	205	163	733	1271	149	0.4	1.85	1.26	5.36	8.95	1.28	0.00160807	2.51306	up
c103775.graph_c4	90	4427	4867	101	126	55	8.87	187.26	183.84	6.8	9.93	5.02	0.000266782	-3.81839	down
c103782.graph_c0	83	10069	14140	32	14	24	5.67	223.77	286.7	1.01	0.52	0.75	3.61109e-08	-6.1131	down
c103785.graph_c2	71	231	298	39	66	28	3.52	12.49	14.15	1.72	2.82	1.46	0.00764686	-1.64816	down
c103788.graph_c1	180	418	430	704	1283	398	4.28	10.8	9.72	14.8	26.12	9.92	0.00219767	1.52093	up
c103803.graph_c0	12	20	25	60	167	25	1.57	2.86	3.15	7.11	19.19	3.45	0.00369061	2.20493	up
c103808.graph_c1	23	48	46	1637	4671	708	1.09	1.49	1.25	41.73	114.33	21.68	2.01918e-21	5.78463	up
c103810.graph_c1	130	407	509	55	70	57	10.03	34.23	37.54	3.8	4.68	4.62	0.00160807	-1.89575	down
c103837.graph_c0	172	311	206	626	744	288	3.67	7.3	4.09	10.67	13.05	5.99	0.00532077	1.53776	up
c103851.graph_c1	130	560	269	28	29	7	4.97	23.6	10.49	0.94	0.93	0.4	3.36122e-06	-3.2607	down
c103859.graph_c0	13	50	57	430	1133	215	1.23	5.14	5.15	36.87	91.59	21.4	9.0056e-10	3.9842	up
c103864.graph_c0	795	1941	2161	3817003	1565876	2435571	7.93	21.05	20.5	33607.2	13344.8	25476.9	2.2906e-69	10.5991	up
c103878.graph_c0	80	1309	1688	28	50	47	7.18	128.23	145.07	2.25	3.9	4.44	0.000219251	-3.49188	down
c103878.graph_c3	100	955	1259	83	94	58	1.95	20.06	23.15	1.41	1.55	1.18	0.00381906	-2.46449	down
c103888.graph_c0	131	1015	1989	30	48	42	1.89	20.23	32.01	0.31	0.62	0.6	2.13576e-05	-3.6685	down
c103889.graph_c0	59	505	675	46	43	25	0.89	8.72	10.89	0.73	0.7	0.4	0.00207114	-2.60258	down
c103891.graph_c0	2	28	38	98	417	44	0.03	0.48	0.57	1.36	5.6	0.72	0.00323725	2.97571	up
c103906.graph_c1	182	251	312	693	1292	329	3.99	5.96	6.48	13.37	24.13	7.53	0.00128618	1.8149	up
c103910.graph_c0	0	5	15	812	2637	312	0	0.08	0.21	10.78	33.89	4.92	1.54358e-13	6.82585	up
c103916.graph_c2	402	1726	1477	73	81	88	3.81	17.95	13.34	0.62	0.67	0.87	3.66588e-07	-3.12247	down
c103942.graph_c0	340	1027	1389	122	191	97	4.88	16.6	19.01	1.61	2.47	1.56	5.54866e-05	-2.19208	down
c103944.graph_c2	71	61	65	4	9	4	2.45	2.29	2.13	0.12	0.27	0.14	6.23449e-05	-3.08837	down
c103964.graph_c1	291	1121	957	3062	4920	2010	7.92	32.38	26.06	74.87	132.08	64.82	1.15461e-06	2.45265	up
c103966.graph_c1	443	488	578	2842	2323	2616	13.15	17.67	17.68	51.26	42.71	60.64	7.27066e-06	2.66646	up
c103971.graph_c4	20	358	484	15	32	19	1.09	20.98	25.39	0.72	1.49	1.09	0.00590266	-2.74115	down
c103978.graph_c0	6	125	106	991	4010	473	0.15	3.07	2.62	21.69	88.19	12.31	6.82713e-06	4.31048	up
c103989.graph_c1	281	1302	451	75	96	79	5.93	26.69	8.07	1.78	1.98	1.85	0.000673464	-2.3395	down
c103994.graph_c0	154	170	151	560	1815	325	1.22	1.45	1.15	4.5	14.21	3.01	0.000577933	2.44411	up
c103998.graph_c0	205	1220	1487	107	233	119	3.52	27.97	25.56	1.52	3.2	1.98	0.00737019	-2.00331	down
c103998.graph_c1	204	631	477	68	116	68	3.16	10.69	7.01	0.93	1.53	1.11	0.000158734	-1.86415	down
c104000.graph_c0	211	560	231	905	2768	923	5.3	20.88	7.08	21.26	62.09	24.83	0.000187082	2.3794	up
c104013.graph_c0	65	145	195	2	0	2	5.25	17.54	20.54	0.3	0	0.35	1.1694e-10	-5.4152	down
c104026.graph_c0	203	618	357	87	170	67	2.26	7.46	3.77	0.85	1.61	0.78	0.00922385	-1.43028	down
c104027.graph_c0	158	294	288	1365	2461	532	6.95	10.36	12.12	39.55	89.56	18.11	8.27686e-07	2.71874	up
c104031.graph_c1	76	8988	9338	35	52	22	1.11	141.1	135.61	0.45	0.64	0.33	1.69143e-07	-5.60613	down
c104033.graph_c0	6	42	91	31702	107528	11586	0.13	1.2	2.28	677.72	2323.63	307.28	7.14111e-29	9.22736	up
c104034.graph_c0	56	891	1045	56	118	20	0.59	10.24	10.33	0.51	1.06	0.22	0.0094784	-2.58102	down
c104040.graph_c0	20	32	41	54	173	58	0.67	1.12	1.46	1.66	5.85	2.4	0.00436552	1.82039	up
c104043.graph_c0	22	896	983	18	66	5	0.42	18.62	17.88	0.3	1.08	0.1	0.00325577	-3.37775	down
c104054.graph_c2	412	1466	1599	236	438	157	14.7	36.41	30.58	6.69	11.86	5.27	0.00694044	-1.57449	down
c104060.graph_c1	82	277	177	17	25	9	1.87	11.1	4.41	0.42	0.47	0.36	7.47077e-07	-2.85053	down
c104074.graph_c0	346	498	539	1232	2578	686	7.74	12.56	11.16	24.34	48.06	17.58	0.000489642	1.87439	up
c104090.graph_c1	4	199	111	27732	120	29	0.17	8.93	4.81	851.68	3.66	1.13	0.00305125	4.3709	up
c104100.graph_c1	471	351	251	1056	2516	1337	7.47	5.24	3.3	12.74	28.97	19.39	0.00416685	2.18367	up
c104102.graph_c0	1022	12725	16490	965	1703	770	17.79	255.01	289.24	15.68	26.62	14.25	0.00960489	-2.3375	down
c104120.graph_c0	108	1069	1540	82	179	27	5.21	54.52	82.93	3	6.18	0.97	0.00797798	-2.52755	down
c104137.graph_c1	140	329	310	635	1637	257	4.1	12.33	10.32	17.35	41.22	7.88	0.00714284	1.84926	up
c104141.graph_c0	115	467	304	72	77	42	3.63	14.6	7.82	1.8	1.98	1.58	0.00619052	-1.64679	down
c104143.graph_c0	6	5	1	353	1943	271	0.27	0.25	0.04	14.2	75.76	12.89	2.7878e-14	6.71053	up
c104176.graph_c0	165	224	217	618	1220	1056	5.05	7.98	6.55	17.65	32.69	34.26	1.26178e-05	2.54507	up
c104198.graph_c0	25	31	13	73	168	43	0.95	1.28	0.47	2.46	5.47	1.71	0.00931241	2.0385	up
c104202.graph_c0	126	158	149	376	962	179	2.8	3.82	3.15	7.4	18.33	4.17	0.0067414	1.85498	up
c104219.graph_c0	152	773	774	89	122	63	4.15	21.2	19.18	2.03	2.84	1.71	0.00199789	-2.00421	down
c104239.graph_c1	46	363	553	37	29	26	1.9	20.89	25.91	1.15	1.64	1.25	0.00458047	-2.48895	down
c104240.graph_c0	31	52	45	105	256	55	0.67	1.23	0.93	2.03	4.76	1.25	0.00425375	1.83801	up
c104246.graph_c0	287	829	1081	124	244	61	5.76	18.92	21.72	2.21	4.22	1.28	0.00223376	-1.90219	down
c104281.graph_c0	105	273	338	64	57	25	12.22	49.94	50.42	9.81	8.65	4.45	0.00463019	-1.75893	down
c104282.graph_c1	21	4673	5434	32	34	12	0.85	119.12	123.76	0.79	0.76	0.31	1.00772e-05	-5.12195	down
c104294.graph_c0	72	173	100	30	21	16	1.27	3.77	1.34	0.38	0.25	0.24	0.0058076	-1.82006	down
c104296.graph_c1	22	51	35	4	2	2	1.35	3.4	2.05	0.22	0.11	0.13	0.000350095	-3.0183	down
c104329.graph_c0	18	18	39	142	587	25	0.26	0.34	0.59	2.28	7.57	0.43	0.00261056	2.99284	up
c104330.graph_c0	70	381	357	1322	3944	583	2.01	14.94	12.02	88.14	244.26	42.85	0.000109798	2.97375	up
c104335.graph_c1	274	771	600	160	179	115	19.56	50.98	36.99	9.96	9.45	8.68	0.00625513	-1.34615	down
c104337.graph_c0	50	167	118	426	1002	185	1.37	5	3	10.35	22.72	5.13	0.000168209	2.44904	up
c104341.graph_c3	33	32	30	586	1901	252	3.8	4.02	3.31	60.77	191.19	30.54	2.90328e-10	4.54157	up
c104356.graph_c1	1	2	8	59	116	25	0.17	0.37	1.32	9.2	17.56	4.41	1.78065e-06	4.07682	up
c104356.graph_c2	14	18	5	141	353	81	1.04	1.46	0.36	9.39	22.79	6.35	1.32864e-06	3.75659	up
c104360.graph_c0	0	11	5	333	1074	134	0	0.22	0.09	5.52	17.14	2.63	6.74966e-12	6.10728	up
c104367.graph_c1	10	218	739	4	26	8	1.72	4.63	14.26	0.79	3.77	1.14	0.00325577	-3.45724	down
c104390.graph_c0	254	616	663	94	93	104	5.52	17.32	16.17	1.96	1.85	2.68	0.0025018	-1.77484	down
c104402.graph_c0	26	119	114	3	17	8	1.07	6.33	4.62	0.2	1.28	0.28	0.00208235	-2.53683	down
c104403.graph_c0	18	71	78	157	370	74	0.59	2.36	2.16	4.2	8.87	2.75	0.00346713	2.08155	up
c104413.graph_c1	186	548	595	41	107	72	2.89	13.67	14.71	0.64	1.92	1.21	0.0011395	-2.01516	down
c104417.graph_c0	300	756	852	1570	4161	717	6.12	13.32	13.28	21.2	61.61	12.53	0.00389592	1.93626	up
c104427.graph_c0	16	17	28	148	91	37	0.29	0.33	0.48	2.33	1.39	0.69	0.00237259	2.36055	up
c104433.graph_c1	21	6322	8399	12	19	21	0.35	115.48	134.22	0.18	0.27	0.37	9.06636e-07	-5.75274	down
c104444.graph_c0	1206	2896	4151	488	608	363	14.5	37.86	47.45	5.18	6.25	4.59	0.000107802	-1.95848	down
c104451.graph_c1	275	348	426	61	101	42	16.7	21.27	23.4	3.11	2.88	2.18	4.69244e-05	-2.00943	down
c104456.graph_c2	40	321	360	1134	2591	251	0.91	8.07	7.9	23.05	50.93	6.05	0.00662163	2.55775	up
c104457.graph_c2	479	1923	756	169	188	188	21.94	57.06	20.31	10.07	6.81	6.99	0.0068202	-1.86725	down
c104466.graph_c0	76	940	1101	52	93	62	2.74	32.25	32.22	1.68	2.65	2.36	0.00579945	-2.48158	down
c104467.graph_c3	128	2036	2303	138	232	69	3.74	57.85	66.38	3.12	4.1	1.4	0.0070926	-2.5388	down
c104476.graph_c0	70	196	229	27	36	27	3.47	10.59	10.84	1.19	1.54	1.41	0.00112437	-1.87933	down
c104476.graph_c1	270	1572	1859	170	269	111	7.57	42.2	43.96	4.26	6.42	3.75	0.00304853	-2.11147	down
c104517.graph_c0	4	114	120	376	2230	102	0.16	5.99	4.95	12.91	66.22	4.32	0.00645011	3.18233	up
c104521.graph_c1	170	548	206	44	48	9	3.21	13.2	4.48	0.76	0.79	0.18	0.000599273	-2.6482	down
c104536.graph_c1	30	74	75	238	715	95	0.72	3.14	4.12	6.6	17.98	2.4	0.000303713	2.61436	up
c104537.graph_c0	37	274	188	538	968	482	1.01	8.18	4.9	13.06	22.7	13.86	0.0004995	2.39668	up
c104544.graph_c0	20	3893	4734	70	211	25	0.46	64.79	50.31	1.15	2.79	0.44	0.0050424	-3.50866	down
c104546.graph_c0	30	219	285	27	30	14	0.36	6.75	11.05	0.28	0.73	0.17	0.00980499	-2.16875	down
c104547.graph_c0	463	2794	4054	143	334	187	10.96	71.82	91.21	2.99	6.76	4.64	0.000380962	-2.70935	down
c104560.graph_c5	0	4	8	66	177	22	0	0.23	0.41	3.16	8.21	1.24	1.03602e-05	4.21952	up
c104563.graph_c0	68	292	317	603	1543	313	1.74	8.29	8.42	13.63	33.76	8.38	0.00319018	2.10291	up
c104564.graph_c3	313	753	696	129	224	83	5.92	10.76	8.69	1.5	2.53	1.63	0.000389166	-1.60415	down
c104570.graph_c0	170	188	332	13473	6350	15394	5.14	9.98	8.85	391.49	166.87	412.06	8.41e-17	5.79426	up
c104571.graph_c0	504	683	715	143	202	132	9.92	16.36	16.59	2.38	3.67	2.76	0.000995783	-1.59493	down
c104574.graph_c0	67	49	233	0	8	0	1.16	0.97	4.96	0	0.09	0	0.000143335	-4.37384	down
c104575.graph_c1	23	2812	3927	25	9	37	1.65	260.25	320.57	1.66	0.56	2.85	0.000214578	-4.48282	down
c104582.graph_c2	53	3438	3967	19	32	16	1.24	89.79	92.14	0.2	0.47	0.25	4.71753e-07	-5.21349	down
c104584.graph_c0	244	727	1072	124	66	71	8.08	26.21	33.82	3.64	1.9	2.49	0.00184845	-2.23092	down
c104595.graph_c1	155	14250	16539	117	294	106	3.15	240.95	233.36	1.73	5.05	2.13	4.83455e-05	-4.4629	down
c104597.graph_c0	226	1812	2188	127	214	171	3.15	27.42	28.99	1.56	2.55	2.5	0.00698383	-2.22904	down
c104626.graph_c1	8	7	8	28	76	24	0.93	0.86	1	3.75	9.51	3.04	0.00076569	2.51106	up
c104629.graph_c0	301	914	1020	170	234	145	4.1	14.72	15.23	2.17	2.81	2.2	0.00501184	-1.48095	down
c104641.graph_c0	62	78	46	149	291	113	1.51	1.96	1.05	3.17	5.97	2.84	0.0082707	1.70965	up
c104651.graph_c3	32	1326	2184	45	23	13	5.29	51.4	75.11	6.89	3.55	2.24	0.000282558	-4.00877	down
c104652.graph_c1	125	5496	5837	166	283	71	7.12	115.7	114.55	4.81	5.33	2.91	0.00142309	-3.38534	down
c104656.graph_c3	247	2959	4197	142	258	111	3.06	46.31	53.36	1.55	2.73	1.44	0.000651897	-2.99451	down
c104663.graph_c0	47	62	39	154	513	83	1.77	2.65	1.4	5.35	19.3	3.34	0.0030185	2.27479	up
c104666.graph_c0	30	456	276	20	28	11	1.33	12.49	6.17	0.93	2.18	0.68	0.00145913	-2.83452	down
c104673.graph_c0	55	169	83	447	886	143	1.31	4.39	1.91	9.47	18.15	3.58	0.0007592	2.3989	up
c104673.graph_c1	24	69	24	249	490	99	3.01	9.47	2.89	28.25	53.92	13.11	3.59342e-05	2.92732	up
c104683.graph_c0	37	62	45	463	1226	169	0.62	1.95	0.72	8.65	18.63	2.98	1.16151e-07	3.61247	up
c104693.graph_c1	67	79	85	156	390	142	6.14	7.06	7.03	11.51	27.99	13.19	0.00255767	1.74218	up
c104700.graph_c0	224	1557	2227	149	165	134	2.76	21.28	22.83	1.73	2.16	1.86	0.00369691	-2.33942	down
c104701.graph_c2	134	305	663	33	93	14	9.79	15.06	22.35	2.39	6.81	1.61	0.00178087	-2.48193	down
c104716.graph_c0	49	214	139	7	20	4	1.2	8.7	4.57	0.15	0.41	0.37	1.54247e-05	-3.11059	down
c104722.graph_c0	215	223	210	478	1189	373	4.65	4.94	4.14	9.56	21.89	8.51	0.00593999	1.74032	up
c104733.graph_c0	9	12531	11786	24	216	15	0.15	175.02	146.41	0.27	6.26	0.38	0.00076569	-4.51173	down
c104738.graph_c2	16	474	645	13	14	19	0.72	23.21	27.66	0.52	0.54	0.9	0.00194632	-3.31685	down
c104740.graph_c2	227	193	153	572	1589	329	5.14	4.77	3.32	11.47	30.81	7.82	0.00897842	2.02177	up
c104742.graph_c2	13	961	1464	15	26	8	0.73	18.03	22.65	0.81	1.43	0.51	0.000172844	-4.21624	down
c104747.graph_c3	656	4400	3926	260	221	456	33.95	259.85	192.65	12.1	9.83	25.09	0.00894518	-2.28438	down
c104765.graph_c0	5	25	5	79	205	16	0.74	1.66	0.35	4.79	18.22	2.41	0.00297315	2.9604	up
c104775.graph_c1	186	664	1026	101	116	78	5.18	16.98	22.55	2.15	2.33	2.07	0.00231409	-2.01246	down
c104778.graph_c0	6	3074	3571	19	23	5	0.14	77.25	78.53	0.39	0.46	0.12	4.26832e-05	-5.04663	down
c104812.graph_c0	145	1021	1101	64	161	48	2.63	30.19	29.48	1.01	2.66	1.23	0.00172472	-2.41928	down
c104826.graph_c2	0	5	14	59	233	43	0	0.13	0.31	1.22	4.68	1.06	6.77566e-05	3.94545	up
c104841.graph_c0	449	788	1179	152	249	155	14.24	25.94	35.37	4.2	6.79	5.2	0.00100322	-1.64131	down
c104845.graph_c1	174	131	65	9	10	19	24.49	14.26	4.48	0.5	0.41	1.39	0.00543091	-2.66575	down
c104849.graph_c0	17	6121	7329	54	156	22	0.26	104.32	117.17	0.77	2.15	0.34	0.000690243	-4.22977	down
c104854.graph_c0	123	4127	4913	147	286	78	1.54	57.93	59.93	1.63	3.08	1.03	0.00233604	-3.1653	down
c104860.graph_c0	93	4197	4124	97	201	76	5.88	119.34	108.4	4.78	7.84	4.67	0.00116341	-3.39417	down
c104870.graph_c0	31	11460	12986	111	178	19	0.48	208.77	206.71	1.51	2.17	0.29	0.000304453	-4.5114	down
c104875.graph_c0	10	81	94	540	2198	276	0.19	1.69	1.73	9.3	37.08	6.4	4.32536e-06	3.94805	up
c104878.graph_c0	592	590	698	136	154	110	8.86	9.57	9.45	1.73	1.65	1.46	0.00140687	-1.84096	down
c104883.graph_c0	6	20	20	157	540	67	0.14	0.59	0.56	5.39	22.48	3.37	1.41264e-07	3.97748	up
c104886.graph_c0	231	87	55	5	18	6	18.44	9.71	5.83	0.43	1.26	0.42	0.00101622	-3.31976	down
c104891.graph_c0	10	876	1207	24	38	6	0.59	56.57	68.33	1.27	1.95	0.37	0.00203319	-3.64113	down
c104891.graph_c2	21	1908	2791	46	78	21	0.69	66.89	86.29	1.34	2.12	0.75	0.00129433	-3.71158	down
c104898.graph_c0	1159	2599	2689	441	350	478	43.19	81.83	75.48	14.52	10.9	21.8	0.0072968	-1.69803	down
c104899.graph_c0	174	971	978	100	111	68	1.83	11.07	9.76	0.92	0.99	0.75	0.000936972	-2.23567	down
c104899.graph_c1	97	435	466	62	75	55	1.34	6.64	6.16	0.76	0.9	0.79	0.00936219	-1.72399	down
c104904.graph_c0	13	36	17	1059	3630	398	0.24	0.75	0.31	17.75	59.14	8.01	2.2808e-16	5.94432	up
c104923.graph_c0	4	95	50	18015	48704	5872	0.08	2.1	0.98	323.64	847.02	125.15	9.14003e-22	8.21393	up
c104927.graph_c0	0	4	1	252	1408	151	0	0.14	0.03	9.81	40.98	5.34	3.61514e-15	7.38633	up
c104930.graph_c0	66	311	421	15	39	23	5.58	33.06	38.95	1.05	2.71	1.62	0.000319117	-2.66046	down
c104947.graph_c1	319	1297	2075	122	195	168	12.57	59.8	90.4	4.41	7.47	7.07	0.00275058	-2.1866	down
c104947.graph_c4	700	3143	4478	246	482	376	17.66	94.45	111.14	5.54	10.61	10	0.00265449	-2.18748	down
c104949.graph_c2	239	836	585	74	122	60	6.84	30.76	19.76	1.49	2.72	1.26	1.25713e-05	-2.176	down
c104963.graph_c1	110	29	34	396	894	441	5.91	1.44	1.31	14.12	28.5	21.24	0.00213088	2.92885	up
c104966.graph_c0	109	335	358	57	88	49	1.3	4.41	3.91	0.58	0.86	0.64	0.0048168	-1.52246	down
c104967.graph_c0	1	17	9	167	351	63	0.01	0.25	0.11	2.93	6.18	0.84	5.48901e-08	4.40072	up
c104981.graph_c2	166	206	154	557	917	377	3.96	4.65	3.38	11.56	16.32	7.71	0.000313861	1.98592	up
c104985.graph_c1	32	2763	3544	65	188	24	0.93	86.69	107.63	1.62	4.46	0.69	0.00473648	-3.36246	down
c104989.graph_c0	698	1117	829	108	142	106	12.7	20.65	13.44	1.94	2.07	1.73	6.50474e-07	-2.43565	down
c104994.graph_c2	1	20	22	947	2581	337	0.01	0.25	0.24	9.55	25.2	4.04	2.49601e-13	6.14382	up
c104996.graph_c1	27	567	746	30	70	11	0.87	19.1	21.32	0.98	2.3	0.31	0.0092654	-2.74219	down
c105010.graph_c0	4	415	583	11	32	4	0.08	8.81	11.41	0.2	0.56	0.09	0.00900013	-3.22369	down
c105011.graph_c0	26	3407	4610	9	12	14	1.01	84.7	83.79	0.25	0.34	0.36	3.58574e-07	-5.69733	down
c105014.graph_c2	282	7637	9972	428	815	186	4.96	135.83	154.96	6.47	11.64	3.52	0.00906096	-2.74472	down
c105014.graph_c4	210	3363	4298	260	342	170	4.71	65.6	73.4	4.26	5.43	3.71	0.00904685	-2.47165	down
c105020.graph_c2	275	718	588	811	1466	622	6.63	19.1	13.57	17.57	30.25	16.22	0.00555779	1.24153	up
c105030.graph_c0	123	291	246	513	1167	294	1.71	4.38	3.23	6.24	13.8	4.26	0.000921059	1.81688	up
c105065.graph_c0	31	2983	4177	23	23	17	2.09	203.14	241.31	1.34	1.41	1.26	4.02915e-06	-5.06196	down
c105083.graph_c0	83	355	399	2842	10649	962	1.37	6.38	6.28	41.52	150.56	16.69	7.32048e-07	4.00485	up
c105085.graph_c0	219	6241	7157	113	244	146	2.19	63.34	63.67	0.94	1.91	1.54	0.000242552	-3.62368	down
c105100.graph_c1	46	217	414	19	59	17	1.21	6.21	10.38	0.44	1.33	0.47	0.00959877	-2.20981	down
c105106.graph_c0	187	411	441	1180	2375	557	3.23	7.37	6.65	16.88	32.16	10.11	5.41583e-05	2.20878	up
c105110.graph_c0	35	52	67	211	578	105	0.99	1.61	1.81	5.33	14.08	3.13	6.17701e-05	2.60454	up
c105114.graph_c0	966	2153	3611	402	695	335	8.83	32.33	47.59	3.22	7.15	3.52	0.00168891	-1.73225	down
c105120.graph_c0	317	709	719	2194	4317	1512	8.28	20.16	17.89	50.79	96.57	41.42	2.30394e-09	2.49475	up
c105122.graph_c0	47	72	45	322	667	185	1.32	2.15	1.26	8.88	15.18	5.21	2.97525e-07	2.93066	up
c105141.graph_c2	92	3230	2781	33	97	21	2.15	47.29	33.22	1.21	3.02	1.73	2.44906e-05	-4.21765	down
c105145.graph_c2	144	44	30	2	5	5	6.31	2.1	1.29	0.08	0.19	0.23	0.00125934	-3.52409	down
c105150.graph_c0	84	305	191	346	589	262	11.91	47.38	26.12	44.48	73.47	39.2	0.00761896	1.43897	up
c105161.graph_c0	4	30	15	149	281	53	0.1	0.89	0.32	3.04	6.25	1.24	8.00497e-06	3.42008	up
c105167.graph_c0	8	14	4	40	25	64	0.71	1.35	0.34	3.17	1.92	5.95	0.00822933	2.55641	up
c105167.graph_c2	51	117	78	262	229	494	0.7	1.94	2.19	3.19	2.71	7.31	0.00151883	2.44577	up
c105169.graph_c0	1127	8375	9203	635	1131	360	25.7	89.37	85.47	11.9	21.14	8.71	0.00114124	-2.47164	down
c105170.graph_c1	1	49	62	1624	4623	369	0.02	1.47	1.05	29.31	72.85	9.08	3.31653e-07	5.29539	up
c105172.graph_c0	58	484	299	30	34	30	1.68	14.99	9.62	0.87	0.93	0.87	0.00262276	-2.35028	down
c105179.graph_c3	31	32	43	8	7	3	3.97	4.48	5.3	0.93	0.79	0.41	0.00922385	-2.09295	down
c105183.graph_c0	17	3586	4390	15	39	5	0.23	62.53	72.68	0.18	0.45	0.07	9.6402e-06	-5.22215	down
c105209.graph_c0	77	701	772	20	58	19	1.71	16.93	16.32	0.39	1.1	0.44	8.44983e-05	-3.22435	down
c105229.graph_c2	109	4856	3654	166	165	94	4.49	299.47	193.89	6.78	7.66	4.48	0.00205703	-3.20245	down
c105232.graph_c0	225	346	319	532	1201	371	2.42	4.65	3.31	5.54	11.55	4.45	0.00666307	1.44671	up
c105241.graph_c0	3	44	51	764	1696	65	0.14	2.13	1.88	28.6	50.09	2.97	4.44709e-05	4.30372	up
c105248.graph_c0	251	965	803	1451	2691	960	3.41	14.26	10.38	17.42	31.28	13.69	0.00200298	1.70718	up
c105254.graph_c0	647	3323	3427	342	475	304	11.66	91.15	82.63	4.88	7.58	6.32	0.00147738	-2.05687	down
c105261.graph_c2	146	303	401	841	1983	481	2.17	4.9	5.7	10.99	25.22	7.49	0.000128131	2.17843	up
c105279.graph_c2	41	254	367	17	23	21	2.68	12.74	15.4	0.66	0.89	0.98	0.00150937	-2.59027	down
c105279.graph_c5	191	1424	1498	72	149	86	2.37	17.97	16.8	0.75	1.56	1	0.000602448	-2.59041	down
c105291.graph_c1	0	2	1	233	302	89	0	0.34	0.15	32.46	40.83	14.4	3.91387e-17	7.05699	up
c105301.graph_c0	348	2818	4091	195	293	163	7.06	44.94	57.21	4.23	5.6	4	0.000947703	-2.67345	down
c105302.graph_c0	30	153	111	375	1046	156	0.45	2.51	1.59	4.92	13.47	2.41	0.000726739	2.57113	up
c105302.graph_c1	679	967	1008	1656	3085	1045	26.53	40.56	37.57	57.31	113.41	43.52	0.00675779	1.35467	up
c105306.graph_c1	144	791	878	60	95	50	2.36	82.32	89.87	1.88	3.46	2.23	0.000246716	-2.46866	down
c105316.graph_c0	128	119	166	394	876	184	1.76	1.77	2.18	4.79	10.31	2.65	0.00675779	1.86095	up
c105320.graph_c0	75	159	155	302	442	131	4.9	11.32	9.68	17.62	24.98	9	0.00705853	1.46221	up
c105329.graph_c1	589	2066	1931	314	315	122	12.15	46.98	36.55	5.97	4.96	2.17	0.000520131	-2.05888	down
c105339.graph_c0	104	171	133	299	732	223	2.52	4.7	3.17	6.97	15.97	4.56	0.00101447	1.8027	up
c105340.graph_c1	7	14	32	493	1872	310	0.09	0.17	0.36	5.44	19.58	4.53	2.47123e-14	5.46974	up
c105341.graph_c0	12	21	1	85	169	32	1.12	2.13	0.09	7.1	13.69	3.14	0.00787513	2.79659	up
c105354.graph_c0	178	4519	4909	284	110	175	5.65	94.54	87.19	8.72	4.48	3.02	0.00716276	-2.86308	down
c105355.graph_c2	30	49	67	6	2	1	2.25	4.24	4.8	0.4	0.13	0.11	0.000168209	-3.25534	down
c105355.graph_c3	523	1106	1037	86	67	50	9.34	13.74	11.65	1.35	1.01	2	5.96797e-11	-3.14857	down
c105363.graph_c0	508	436	417	1899	5394	1101	49.23	46.11	38.71	165.31	455.3	112.35	0.000441232	2.52197	up
c105367.graph_c0	31	271	425	16	39	13	0.39	4.07	5.64	0.23	0.47	0.32	0.00310551	-2.6504	down
c105368.graph_c4	37	57	123	7	8	2	1.53	4.01	5.99	0.26	0.29	0.09	9.26701e-05	-3.04821	down
c105371.graph_c0	94	216	102	5	17	1	2.26	10.75	3.82	0.32	0.66	0.09	9.52846e-06	-3.63818	down
c105377.graph_c0	41	93	209	12	1	4	0.32	0.79	1.58	0.08	0.01	0.03	0.00146749	-3.22558	down
c105415.graph_c0	80	5875	7393	80	52	44	3.52	174.29	191.92	3.4	2.28	2.41	2.18646e-05	-4.6189	down
c105418.graph_c0	555	1816	2390	234	325	141	7.06	14.91	17.6	2.24	2.33	1.57	8.67339e-05	-2.20968	down
c105422.graph_c0	81	270	257	54	43	22	3.71	12.56	9.63	1.83	1.46	0.95	0.00591766	-1.77381	down
c105423.graph_c1	41	766	1119	59	83	28	2.26	46.09	58.97	2.9	3.95	1.62	0.00956768	-2.60725	down
c105437.graph_c0	435	1258	1541	165	320	155	3.87	11.45	12.06	1.35	2.37	1.9	0.000509152	-1.82755	down
c105446.graph_c0	286	1338	2354	161	359	131	5.52	24.85	35.56	2.77	5.91	2.61	0.00993717	-1.99856	down
c105459.graph_c0	294	1751	4300	32	20	7	4.47	28.98	62.23	0.43	0.26	0.11	2.92926e-10	-5.48586	down
c105469.graph_c0	13	14	14	232	744	83	0.16	0.19	0.16	2.51	7.81	1.07	8.76749e-09	4.38493	up
c105471.graph_c3	125	3547	3472	74	140	101	2.84	87.69	75.13	1.49	2.73	2.43	0.00061587	-3.37855	down
c105480.graph_c0	671	1799	2176	276	417	289	5.17	15.08	15.94	1.88	2.74	2.34	0.00112339	-1.68817	down
c105489.graph_c0	0	11	4	2346	9935	1056	0	0.31	0.12	54.78	226.39	29.34	6.86873e-23	8.74017	up
c105496.graph_c0	280	572	523	1108	3298	697	4.2	5.9	4.44	11.32	28.99	9.27	0.00067918	2.04495	up
c105505.graph_c1	67	119	138	215	366	143	0.55	1.06	1.08	1.56	2.57	1.23	0.00154894	1.47043	up
c105513.graph_c0	138	169	123	551	960	284	2.99	3.09	1.98	8.2	13.82	5	0.000341529	2.16063	up
c105520.graph_c0	446	1418	450	171	103	87	8.96	30.89	8.61	3.04	1.77	1.83	0.00681631	-2.04385	down
c105524.graph_c0	225	1269	1220	61	48	52	3.88	24	20.37	0.94	0.69	0.95	3.43191e-06	-3.21825	down
c105526.graph_c1	171	144	120	354	785	366	3.3	2.8	2.06	10.31	15.05	13.68	0.00742324	1.8576	up
c105529.graph_c0	939	6380	7450	506	697	324	20.24	124.37	126.95	9.82	10.9	7.11	0.000416295	-2.55936	down
c105538.graph_c0	122	202	165	804	2314	445	2.57	4.62	3.48	26.54	75.47	17.05	1.72882e-06	2.90786	up
c105541.graph_c0	51	3122	4783	13	13	4	0.6	45.54	54.72	0.15	0.45	0.05	5.07856e-09	-6.14274	down
c105555.graph_c0	177	266	294	479	1028	320	4.37	7.74	7.8	11.27	21.86	8.33	0.00293302	1.53111	up
c105560.graph_c4	127	181	174	597	1333	349	16.79	26.15	22.11	71.42	154.83	48.67	1.10435e-05	2.37446	up
c105580.graph_c2	75	915	941	29	16	28	1.46	19.31	17.38	0.5	0.27	0.57	9.9128e-05	-3.54921	down
c105593.graph_c0	160	201	195	462	972	257	4.19	5.44	4.75	10.61	22.06	7.39	0.00325659	1.73539	up
c105596.graph_c1	341	10530	12724	195	327	195	4.84	160.45	170.44	2.49	4.1	2.96	9.23724e-05	-3.85477	down
c105605.graph_c0	143	887	1055	14	2	43	7.31	45.63	47.56	0.59	0.08	2.27	0.00208235	-3.51446	down
c105617.graph_c1	45	1667	2054	28	27	45	1.46	97.85	108.27	0.88	0.85	1.59	0.00041755	-3.77729	down
c105623.graph_c3	260	11086	15166	417	790	408	5.46	212.4	254.44	6.89	12.28	7.83	0.00678262	-2.94573	down
c105639.graph_c0	20	661	557	11	21	13	0.54	16.88	12.55	0.35	0.37	0.39	0.000339456	-3.61143	down
c105656.graph_c0	37	326	459	25	32	14	0.58	5.54	6.83	0.35	0.43	0.23	0.00154364	-2.71647	down
c105660.graph_c0	1219	3253	4039	548	781	534	7.93	22.62	24.78	3.33	4.28	3.6	0.00146048	-1.639	down
c105668.graph_c0	130	441	364	800	1860	468	1.57	7.62	5.24	8.61	18.89	5.84	0.000603265	2.014	up
c105677.graph_c1	91	160	123	724	2902	254	1.25	2.4	1.61	8.83	34.21	3.67	6.78145e-05	3.19996	up
c105727.graph_c3	18	24	31	133	468	58	0.96	1.45	1.37	4.88	18.63	2.75	5.44962e-05	3.0752	up
c105738.graph_c2	256	375	333	670	920	387	6.25	9.96	7.74	14.5	19.26	9.92	0.00857014	1.30542	up
c105744.graph_c0	92	226	383	27	32	18	5.53	6.46	9.21	1.31	1.52	1.12	2.43219e-05	-2.57982	down
c105774.graph_c0	14	1881	3072	44	109	22	0.88	46.58	54.68	0.87	1.91	0.38	0.00382529	-3.51895	down
c105778.graph_c0	116	12616	17459	297	459	187	1.29	99.94	189.28	3	4.93	2.61	0.00159878	-3.64833	down
c105779.graph_c0	732	1773	3054	276	466	264	5.31	13.99	21.16	1.78	2.92	2.01	0.000995783	-1.91222	down
c105783.graph_c0	88	413	439	49	81	40	1.15	6.79	6.44	0.58	0.9	0.54	0.00428827	-1.8668	down
c105784.graph_c0	421	643	949	117	94	46	8.37	11.15	14.75	2.14	1.6	1.04	1.53132e-05	-2.46786	down
c105807.graph_c0	94	288	317	32	33	32	5.45	12.35	11.19	1.53	1.01	1.55	0.000266899	-2.19557	down
c105817.graph_c1	9	365	300	12	25	5	0.45	14.11	7.84	0.37	0.57	0.4	0.00603701	-3.00464	down
c105825.graph_c0	63	1627	1195	54	124	61	0.52	16.23	9.9	0.4	0.93	0.54	0.00686456	-2.6666	down
c105845.graph_c2	213	3934	5674	199	464	123	13.1	107.09	129.21	12.38	20.76	10.28	0.00501203	-2.78874	down
c105860.graph_c2	6	40	50	582	308	334	0.59	4.13	4.42	47.74	25.11	31.75	1.13639e-07	4.0105	up
c105869.graph_c0	5	3	14	68	89	27	0.83	0.68	2.25	10.34	13.13	4.6	0.000132864	3.10559	up
c105910.graph_c1	115	2465	2986	158	245	75	1.91	43.9	46.66	2.34	3.44	1.3	0.00769399	-2.65827	down
c105913.graph_c0	5	20	44	180	366	49	0.21	2.16	4.86	2.8	6.24	0.97	0.000277927	3.15564	up
c105916.graph_c0	89	1026	1111	50	63	63	3.49	41.83	39.72	2	2.27	2.27	0.0021453	-2.70308	down
c105919.graph_c0	5	150	209	5968	13219	1724	0.09	2.9	3.53	91.35	195.64	31.3	3.3171e-08	5.41264	up
c105935.graph_c0	26	11	8	142	961	71	1.8	0.83	0.53	8.76	57.44	5.16	0.000257468	3.82285	up
c105940.graph_c0	16	292	321	10	24	16	0.94	18.61	17.93	0.52	1.21	0.98	0.00712836	-2.68139	down
c105954.graph_c0	11	4692	6190	53	62	14	0.12	56.35	65.02	0.52	0.59	0.16	0.00027094	-4.52923	down
c105954.graph_c1	38	10278	12895	132	98	36	0.3	89.05	98.54	0.93	0.81	0.64	0.000140512	-4.59653	down
c105961.graph_c0	72	77	80	309	899	102	1.44	1.58	1.45	5.32	14.42	2.23	0.002646	2.39887	up
c105967.graph_c0	181	50085	56345	1311	2473	678	1.93	580.13	570.19	12.33	22.5	7.58	0.00991009	-3.24014	down
c105970.graph_c0	393	556	576	128	174	93	12.24	22.24	21.07	3.47	4.45	3.14	0.000651897	-1.57122	down
c105977.graph_c0	525	749	751	2751	3149	2557	5.91	9.15	6.91	23.15	30.7	31.17	3.72935e-07	2.40008	up
c105984.graph_c1	198	457	576	82	126	99	5.7	12.83	13.83	2.6	2.86	2.94	0.00896501	-1.45642	down
c105988.graph_c0	8	1797	2384	26	12	10	0.1	28.62	35.34	0.29	0.12	0.12	0.000194925	-4.51825	down
c105991.graph_c0	281	431	440	756	1040	583	8.05	12.11	10.71	18.55	25.39	16.3	0.00131572	1.38134	up
c105992.graph_c1	48	101	86	17	11	7	2.61	4.91	3.66	0.95	0.57	0.55	0.000912579	-2.19587	down
c106000.graph_c0	241	496	368	58	100	81	5.35	10.56	6.71	1.03	1.64	1.59	0.00183516	-1.71016	down
c106001.graph_c0	13	5395	6919	22	45	6	0.13	57.87	64.91	0.19	0.38	0.06	1.34125e-05	-5.30682	down
c106012.graph_c0	247	2129	2345	111	136	79	10.05	48.51	47.47	2.68	2.66	2.88	7.47418e-05	-3.02862	down
c106025.graph_c0	50	47	35	241	579	73	0.91	0.94	0.61	3.9	9.07	1.4	0.00171714	2.5777	up
c106045.graph_c0	59	170	183	685	1904	198	1.28	6.24	4.9	21.28	45.32	7.85	0.000294837	2.79821	up
c106053.graph_c0	388	1115	1233	156	242	155	6.85	27.48	18.85	2.54	4.34	3	0.000474651	-1.76229	down
c106061.graph_c0	48	2079	3047	43	82	32	0.43	18.38	22.7	0.31	0.63	0.25	0.000306104	-3.82435	down
c106064.graph_c1	33	257	404	15	23	12	1.56	9.6	13	0.39	0.71	0.92	0.000527076	-2.94674	down
c106075.graph_c1	100	1078	1651	54	83	84	1.56	19.18	25.81	0.82	1.11	1.69	0.00382869	-2.68775	down
c106080.graph_c0	148	438	407	1488	4872	656	1.86	8.77	7.26	63.54	195.99	29.8	4.55296e-05	2.88768	up
c106084.graph_c0	12	32	45	96	244	58	0.33	0.51	0.78	1.8	4.42	0.9	0.000349912	2.36686	up
c106099.graph_c0	483	1729	1741	210	212	141	9.35	47.04	42.15	4.09	4.59	3.78	6.23449e-05	-2.19639	down
c106112.graph_c1	124	375	391	830	1450	494	2.97	9.75	8.92	17.57	29.71	12.39	0.000105546	1.98233	up
c106116.graph_c0	173	270	373	1456	1752	396	1.84	3.21	3.79	16.53	16.27	4.39	0.000267198	2.33176	up
c106118.graph_c0	76	6408	8542	87	78	44	2.03	158.07	183.34	2.25	2.89	1.36	2.9202e-05	-4.58719	down
c106120.graph_c0	1	1	7	104	379	43	0.02	0.01	0.09	1.26	4.91	0.77	1.55643e-08	5.29001	up
c106131.graph_c5	102	281	142	475	1453	203	2.68	9.27	3.66	11.35	33.79	5.81	0.00582133	2.09575	up
c106138.graph_c0	62	1576	1833	62	177	39	1.37	71.48	74.79	1.27	2.6	0.7	0.00750646	-2.77731	down
c106142.graph_c0	6	27	14	81	277	29	0.07	0.34	0.16	0.84	2.78	0.36	0.000452427	3.00545	up
c106155.graph_c1	13	1	9	107	465	34	0.37	0.03	0.25	2.73	11.5	1.03	0.000669705	3.78424	up
c106178.graph_c0	46	1275	1585	53	53	13	0.7	16.18	16.11	0.54	0.96	0.13	0.000748687	-3.50105	down
c106213.graph_c0	116	1374	1479	45	84	35	1.43	19.01	17.89	0.49	0.93	0.45	6.60293e-05	-3.3181	down
c106217.graph_c2	5	1762	1826	23	97	11	0.11	41.86	38.04	0.45	1.81	0.25	0.00853766	-3.41809	down
c106229.graph_c0	523	16487	19139	696	1409	425	25.8	869.43	878.02	31.55	59.89	22.99	0.00544624	-2.88837	down
c106229.graph_c1	99	10613	12851	42	295	41	1.82	85.11	90.23	0.49	2.03	0.83	0.000127177	-4.50064	down
c106230.graph_c0	1166	11073	12798	875	955	885	7.35	77.1	77.51	4.87	5.13	5.85	0.00607206	-2.32802	down
c106231.graph_c0	68	905	872	17	28	46	2.02	36.56	28.82	0.51	0.69	1.48	0.00103336	-3.16292	down
c106234.graph_c1	16	490	925	31	35	8	0.22	5.63	8.81	0.2	0.28	0.06	0.00473413	-3.16022	down
c106235.graph_c0	5	9225	9719	53	99	12	0.07	180.97	134.74	0.91	1.51	0.23	0.000395991	-4.66378	down
c106238.graph_c0	22	2250	2486	19	90	16	0.58	61.61	55.89	0.5	2.14	0.93	0.000722783	-3.94509	down
c106252.graph_c0	20	24	31	3	2	1	1.19	1.99	2.5	0.15	0.13	0.06	0.00151169	-2.95014	down
c106252.graph_c1	311	1189	1055	94	163	81	14.86	62.47	48.3	4.02	6.76	4.04	6.23392e-06	-2.35934	down
c106256.graph_c0	0	5	1	218	443	74	0	0.51	0.09	18.13	35.73	7.22	2.56593e-13	6.38767	up
c106256.graph_c2	0	4	2	259	650	104	0	0.51	0.22	27.27	66.46	12.79	2.05561e-16	6.83387	up
c106262.graph_c0	242	496	422	754	787	4585	7.87	7.63	8.27	10.22	10.83	58.39	0.00815851	2.76676	up
c106277.graph_c0	49	243	266	19	38	17	1.26	3.91	3.8	0.3	0.52	0.6	0.000988794	-2.28713	down
c106280.graph_c1	231	437	511	729	1338	445	6.82	8.81	7.06	19.17	36.11	14.87	0.00389592	1.38778	up
c106285.graph_c0	28	4150	4588	30	28	3	0.58	94.22	91.15	0.55	0.5	0.07	9.5954e-06	-5.21824	down
c106285.graph_c1	17	10151	12824	45	67	13	0.19	76.23	82.18	0.38	0.51	0.09	1.4527e-05	-5.32447	down
c106286.graph_c0	350	612	508	1527	2709	725	5.12	9.44	7.16	18.52	30.66	11.51	0.000205825	1.9553	up
c106287.graph_c0	820	4515	6613	406	389	290	12.24	73.53	93.47	5.38	4.99	4.55	0.000285825	-2.66657	down
c106321.graph_c1	31	1003	1636	23	67	29	0.89	35.24	51.11	0.68	1.95	1.05	0.00160807	-3.36873	down
c106321.graph_c2	327	1243	1728	205	242	155	3.19	13.17	16.74	1.77	2.02	1.59	0.00491618	-1.81826	down
c106324.graph_c2	137	277	329	441	824	349	3.29	4.56	5.57	6.9	13.19	6.79	0.0010784	1.46172	up
c106335.graph_c1	113	1019	682	55	67	40	2.54	35.42	26.12	1.83	1.87	1.32	0.000326654	-2.70015	down
c106348.graph_c3	40	74	50	0	3	0	2.21	7.38	7.02	0	0.17	0	9.45451e-07	-4.74803	down
c106351.graph_c0	743	626	534	2092	4211	1345	9.55	8.54	6.37	27.27	55.02	18.06	0.00326289	2.01359	up
c106356.graph_c2	316	896	1143	153	272	133	6.93	17.08	15.38	2.09	4.15	2.47	0.00344308	-1.5716	down
c106358.graph_c2	39	774	948	23	28	43	1.74	37.52	40.22	0.91	1.07	2.01	0.00327755	-3.01604	down
c106361.graph_c1	61	13	5	493	30	1607	1.43	0.33	0.11	9.93	0.59	39.07	0.00581185	3.74445	up
c106379.graph_c1	41	252	230	957	3638	444	1.1	7.36	5.88	22.76	83.76	12.51	6.34269e-05	3.29033	up
c106379.graph_c6	230	314	220	849	2643	430	4.09	4.5	3.12	8.64	26.29	6.08	0.00126023	2.321	up
c106402.graph_c1	3	3804	3220	34	71	6	0.14	177.86	130.2	1.02	1.95	0.19	0.0020218	-4.11107	down
c106412.graph_c2	717	1546	1723	212	234	316	7.16	17.58	16.9	1.82	2.06	3.4	0.0075136	-1.7348	down
c106420.graph_c0	20	1060	379	4	36	7	0.64	36.5	11.91	0.13	1.01	0.52	0.000924509	-3.76607	down
c106432.graph_c2	170	2912	3773	141	172	154	3.22	60.01	68.02	2.36	2.81	3.06	0.00297572	-2.84221	down
c106432.graph_c3	154	3031	3467	141	173	98	6.27	134.19	134.17	5.09	6.04	4.19	0.00131572	-3.02599	down
c106493.graph_c0	128	287	355	544	1471	263	2	4.87	5.26	7.49	19.61	4.32	0.00998256	1.7456	up
c106496.graph_c1	109	292	252	398	662	238	2.97	8.64	6.53	9.59	15.45	6.79	0.0060639	1.33972	up
c106507.graph_c1	590	3036	3908	164	299	193	11.54	64.55	72.7	2.84	5	3.96	4.11627e-05	-2.79055	down
c106519.graph_c1	13	702	791	16	36	8	0.75	46.15	45.28	0.85	1.8	0.49	0.00150894	-3.50775	down
c106527.graph_c4	677	2542	3101	290	650	171	17.04	30.29	32.65	7.23	5.98	1.87	0.00199222	-2.01476	down
c106533.graph_c1	372	643	649	149	211	129	4.25	8.7	7.28	1.42	2.62	1.45	0.00185557	-1.34458	down
c106536.graph_c0	34	1019	1103	26	63	15	0.48	16.08	14.06	0.31	0.82	0.46	0.000972836	-3.37677	down
c106545.graph_c0	127	177	65	1114	2634	306	3.5	5.06	1.5	24.42	51.51	8.01	0.000116067	3.22117	up
c106551.graph_c0	13	96	70	231	546	89	0.33	2.63	1.68	5.16	11.82	2.36	0.00245692	2.46269	up
c106556.graph_c2	82	809	900	60	95	55	1.87	31.7	25.7	2.38	3.34	3.29	0.00607428	-2.30322	down
c106564.graph_c2	8	8	10	39	130	33	0.16	0.17	0.18	0.67	2.16	0.67	6.06453e-05	2.93992	up
c106567.graph_c0	122	6567	8402	180	468	154	0.98	74.84	92.87	1.41	3.48	1.47	0.00450726	-3.14901	down
c106578.graph_c0	33	2502	3109	35	53	20	0.37	43.4	51.12	0.4	0.49	0.22	8.37076e-05	-4.29533	down
c106582.graph_c1	363	1302	1229	232	232	158	4.68	18.24	15.11	2.63	2.56	2.14	0.00420937	-1.62463	down
c106588.graph_c1	441	3834	4552	214	209	276	11	104.01	108.05	4.74	4.49	7.23	0.00168157	-2.68542	down
c106596.graph_c1	73	323	455	56	60	32	1.07	5.42	6.8	0.67	0.67	0.82	0.00957758	-1.87104	down
c106600.graph_c1	329	2294	2311	154	192	178	4.28	39.71	33.96	2.05	2.59	2.54	0.00131795	-2.41857	down
c106602.graph_c0	138	863	1406	94	103	59	3.65	26.51	36.43	2.23	2.27	1.61	0.0021181	-2.45509	down
c106607.graph_c0	168	1135	1228	32	107	104	1.44	10.64	10.03	0.24	0.78	0.94	0.00469577	-2.49267	down
c106620.graph_c1	6	1532	2033	21	43	16	0.14	37.44	43.38	0.41	0.84	0.38	0.00131572	-3.92083	down
c106620.graph_c2	13	2355	3173	3	27	3	0.63	105.45	123.98	0.17	1.13	0.2	8.01401e-06	-5.39754	down
c106620.graph_c3	31	1930	2244	9	18	12	2.6	154.77	156.45	0.59	1.14	0.92	1.07027e-06	-5.11691	down
c106629.graph_c0	3	2880	4245	20	23	7	0.04	53.43	69.61	0.27	0.32	0.11	0.000113816	-4.91471	down
c106640.graph_c0	111	13421	15950	237	689	109	2.53	226.8	238.89	2.89	9.42	1.88	0.00258169	-3.58556	down
c106646.graph_c0	217	689	810	44	120	54	6.64	18.99	15.56	1.87	2.38	1.22	3.25893e-05	-2.43555	down
c106649.graph_c0	120	813	1011	70	127	66	2.11	20.6	18.96	0.96	1.7	1.08	0.00457245	-2.18128	down
c106651.graph_c0	20	21006	22424	16	8	5	0.08	94.52	88.23	0.06	0.03	0.02	4.96997e-09	-7.02675	down
c106652.graph_c0	106	46487	57146	213	149	44	0.6	277.42	246.37	1.16	0.83	0.26	2.65889e-06	-5.64631	down
c106662.graph_c1	37	3152	3188	31	73	32	2.42	224.22	198.8	1.81	4.12	2.2	0.000146454	-4.16401	down
c106662.graph_c2	907	4737	4754	374	615	270	25.07	60.29	52.53	5.36	7.3	4.7	0.000108571	-2.42458	down
c106668.graph_c4	24	111	148	15	12	9	1.51	7.6	8.89	0.84	0.65	0.59	0.00479145	-2.22959	down
c106675.graph_c0	86	809	138	17	19	25	2.16	21.63	3.37	0.39	0.41	0.66	0.00125533	-3.03238	down
c106679.graph_c0	747	1590	1488	2410	5137	1846	6.39	14.8	12.15	18.23	37.75	16.54	0.000333578	1.59592	up
c106679.graph_c5	75	212	162	275	665	215	9.02	27.86	18.71	29.86	70.05	27.27	0.00201449	1.65882	up
c106679.graph_c6	23	439	766	30	39	18	1.36	30.91	52.8	1.6	1.99	1.11	0.00572061	-2.82896	down
c106684.graph_c0	848	24472	34762	599	1538	407	4.55	379.18	483.28	2.86	7	2.28	0.000548815	-3.53332	down
c106689.graph_c0	93	359	247	1398	3661	437	4.25	19.24	14.06	46.83	119.35	18.07	4.27536e-05	3.04135	up
c106691.graph_c0	182	1269	1934	124	88	135	4.44	41.75	53.01	2.71	1.94	3.71	0.00919335	-2.32788	down
c106691.graph_c2	290	2182	2385	186	257	159	7.67	48.7	53.56	3.97	6.66	5.13	0.00285988	-2.26352	down
c106698.graph_c0	75	221	253	21	21	37	2.51	9.02	7.69	0.93	0.45	1.21	0.00828879	-2.01793	down
c106700.graph_c1	62	87	73	202	399	103	3.91	5.98	4.4	11.43	21.81	6.83	0.00255348	1.8076	up
c106721.graph_c0	33	682	368	6	11	1	0.58	13.38	4.3	0.06	0.12	0.02	1.65713e-06	-4.70384	down
c106730.graph_c0	34	265	295	20	37	9	1.16	9.81	8.62	0.5	0.86	0.27	0.00308364	-2.4853	down
c106732.graph_c1	59	308	501	33	46	14	1.05	10.76	12.27	0.58	1.38	0.26	0.00143665	-2.53471	down
c106740.graph_c0	29	195	71	6	6	8	2.44	14.55	4.92	0.28	0.45	0.46	0.000568172	-2.9599	down
c106744.graph_c2	17	553	628	18	39	4	0.31	11.42	11.13	0.29	0.63	0.08	0.00309473	-3.27483	down
c106746.graph_c1	348	2529	2733	105	151	179	4.47	35.53	34.96	1.19	1.66	2.41	0.000606977	-2.76584	down
c106766.graph_c1	265	674	794	84	195	63	3.9	10.66	11.56	1.13	2.39	1	0.000367956	-1.91091	down
c106775.graph_c0	281	1269	1364	129	215	72	4.1	20.09	18.89	1.66	2.68	1.1	0.000395991	-2.2431	down
c106776.graph_c0	58	63	113	195	569	100	2.77	3.3	5.2	8.63	24.26	5.35	0.00804024	1.9377	up
c106776.graph_c1	58	131	158	301	816	147	1.97	4.83	5.1	9.07	23.77	5.27	0.00225683	2.02999	up
c106795.graph_c0	54	316	286	33	17	25	1.32	11.32	9.19	0.79	0.27	0.66	0.0055658	-2.26731	down
c106827.graph_c0	28	192	111	318	1048	196	0.71	5.34	2.69	7.19	22.99	5.24	0.00222876	2.42122	up
c106829.graph_c1	158	678	589	50	91	87	2.3	12.44	10.46	0.6	1.08	1.33	0.00504291	-1.94324	down
c106834.graph_c0	157	587	285	58	55	62	2.27	9.57	4.27	0.82	0.68	1	0.00558728	-1.88132	down
c106845.graph_c0	62	405	366	706	4450	528	0.61	4.83	3.37	8.3	51.44	7.62	0.0023572	2.76873	up
c106846.graph_c0	204	449	521	1157	2211	533	4.18	10	10.15	20.96	38.77	11.45	0.000391695	1.97768	up
c106857.graph_c0	87	360	215	52	72	28	2.69	10.66	5.06	1.78	1.69	0.9	0.00993717	-1.60499	down
c106858.graph_c0	85	2897	3272	41	69	48	6.95	258.69	257.69	3.02	4.91	4.16	4.98656e-05	-4.04166	down
c106862.graph_c0	74	576	863	70	80	37	5.53	48.29	63.77	4.7	5.18	2.88	0.00818278	-2.25218	down
c106865.graph_c1	68	1454	2038	41	50	45	1.01	23.19	28.44	0.53	0.63	0.69	0.000307938	-3.53247	down
c106872.graph_c0	59	1270	1857	81	134	51	0.82	18.07	29.91	1.07	1.64	1.24	0.00872988	-2.66269	down
c106876.graph_c0	0	20	31	271	881	51	0	0.38	0.51	4.24	12.82	0.96	0.0004995	4.0411	up
c106878.graph_c1	327	158	142	1009	2503	643	4.64	1.91	1.83	12.81	25.1	9.42	0.00447218	2.4568	up
c106890.graph_c1	72	134	136	251275	95598	117144	0.73	1.41	1.24	2150.2	798.04	1235.94	3.15718e-65	10.2913	up
c106895.graph_c0	27	4951	5506	104	239	43	0.23	49.08	49.47	0.79	1.75	0.45	0.00466935	-3.4632	down
c106899.graph_c1	293	464	227	55	57	65	6.04	9.59	4.24	0.99	0.96	1.32	0.00582491	-1.9498	down
c106911.graph_c1	277	2246	2758	204	235	142	8.06	108.68	123.16	4.19	5.6	3.55	0.00257556	-2.39711	down
c106917.graph_c0	83	94	82	318	859	232	2.22	2.42	2.01	7.61	17.69	6.17	6.07578e-05	2.48213	up
c106931.graph_c0	323	659	675	27	83	78	7.11	11.39	9.61	0.5	1.51	2.15	0.000265752	-2.50868	down
c106936.graph_c2	133	2721	3032	113	359	45	3.35	67.4	65.87	2.27	7.06	1.1	0.0097146	-2.71608	down
c106939.graph_c0	248	10171	8294	274	454	159	4.64	302.51	231.36	6.12	7.74	2.74	0.00107545	-3.33905	down
c106940.graph_c0	20	253	125	6	1	7	1.11	23.64	10.4	0.92	0.26	0.64	0.00115222	-3.43758	down
c106942.graph_c2	256	419	214	48	61	26	8.1	11.3	5.4	1.34	1.13	0.79	0.000131857	-2.32596	down
c106957.graph_c0	2730	6463	8329	1289	2169	847	29.09	40.51	47.29	10.21	15.94	8.22	0.00114095	-1.58171	down
c106961.graph_c0	20	6507	9204	38	32	13	0.23	79.06	88.07	0.41	0.39	0.13	5.46484e-06	-5.40234	down
c106962.graph_c1	595	4899	4317	264	452	195	9.32	92.21	69.95	3.59	5.82	3.38	0.000202604	-2.71198	down
c106963.graph_c0	35	56	65	142	476	74	0.36	0.62	0.63	1.28	4.17	0.79	0.00223376	2.19468	up
c106968.graph_c1	61	133	173	30	31	25	2.96	7.01	7.99	1.29	1.29	1.27	0.00936908	-1.54295	down
c106968.graph_c2	1649	682	652	113	224	136	14.37	6.3	5.4	0.77	1.74	1.31	0.00750521	-2.37929	down
c106968.graph_c4	78	75	173	17	20	20	4.21	4.47	8.96	0.82	0.94	1.17	0.00681582	-1.96473	down
c106969.graph_c2	183	3550	3324	113	191	84	5.78	131.32	106.79	3.21	5.39	2.79	0.000360607	-3.24193	down
c106970.graph_c0	138	5996	5826	55	36	21	2.6	128.92	116.12	0.92	0.54	0.38	1.85092e-07	-5.19532	down
c106972.graph_c0	101	621	735	2198	5412	739	4.93	15.62	16.03	39.78	94.48	17.09	0.00149425	2.65954	up
c106982.graph_c0	707	32440	25641	129	166	286	12.44	575	384.61	1.81	2.33	5.43	1.32812e-06	-4.9608	down
c106999.graph_c0	190	503	345	22	21	14	4.93	14.55	13.03	0.75	1.06	0.35	1.32727e-12	-3.59699	down
c107006.graph_c1	181	1080	1889	63	39	39	4.14	25.94	40.05	1.23	0.75	0.93	1.76429e-05	-3.49732	down
c107008.graph_c2	92	2726	2983	61	164	63	1.05	38.42	36.37	0.73	1.63	0.8	0.000995783	-3.3126	down
c107009.graph_c0	73	6328	10045	102	367	55	0.5	45.16	61.09	0.57	1.91	0.42	0.00160552	-3.72387	down
c107029.graph_c0	24	64	32	132	855	139	0.56	1.95	0.82	2.78	17.03	3.43	9.49265e-05	3.1406	up
c107044.graph_c0	405	1406	1366	122	152	133	6	18.99	16.15	1.4	1.61	2.07	3.66877e-05	-2.31208	down
c107046.graph_c2	18	4696	5824	75	58	23	0.13	37.74	40.92	0.49	0.37	0.18	0.000369926	-4.31995	down
c107047.graph_c1	492	2301	2978	167	214	224	8.81	43.7	50.06	2.62	3.23	4.11	0.000612537	-2.45672	down
c107056.graph_c0	36	10265	12610	89	227	37	0.42	103.91	109.94	0.73	1.83	0.36	0.000326654	-4.3868	down
c107057.graph_c1	163	2054	2131	93	190	88	4.09	62.14	54.92	2.09	4.25	2.32	0.00150894	-2.72973	down
c107065.graph_c2	154	781	953	88	187	35	3.15	14.15	18.31	1.52	2.92	0.6	0.00882482	-2.06299	down
c107066.graph_c0	45	2123	2280	46	73	19	0.82	68.6	64.57	0.77	1.28	0.44	0.000294858	-3.82708	down
c107074.graph_c1	156	554	444	76	135	55	2.75	7.57	5.17	0.94	1.44	0.96	0.00247599	-1.62923	down
c107077.graph_c1	122	104	80	175	2176	358	3.17	2.31	1.78	4.41	48.59	10.16	0.00468518	2.75143	up
c107078.graph_c1	294	266	273	57	102	19	4.83	7.91	7.16	1.03	1.72	0.39	0.00761984	-1.99098	down
c107091.graph_c1	424	5183	4714	229	290	168	3.7	45.36	34.19	1.56	1.86	1.35	0.000210633	-3.03171	down
c107097.graph_c1	208	447	557	67	75	49	4.23	13.87	15.96	1.47	1.66	1.97	7.8374e-06	-2.14086	down
c107119.graph_c0	441	1409	1760	230	325	215	8.4	31.36	33.17	3.76	5.05	4.31	0.00385163	-1.6465	down
c107131.graph_c0	56	145	146	0	19	1	0.41	1.16	1.02	0	0.12	0.01	0.00253754	-3.38129	down
c107132.graph_c1	89	669	290	17	11	16	5.21	25.49	9.41	0.93	0.44	0.85	6.55118e-06	-3.57836	down
c107150.graph_c1	176	393	480	1915	5524	778	13.4	25.71	29.48	48.61	106.04	37.58	7.58981e-06	3.0292	up
c107155.graph_c1	143	861	857	42	72	61	2.62	17.27	14.75	0.69	1.14	1.19	0.000293392	-2.6244	down
c107168.graph_c2	895	14452	15988	743	1332	800	19.84	225.4	211.6	12.07	17.46	15.91	0.00595699	-2.55149	down
c107173.graph_c0	34	3177	3331	17	10	4	0.45	55.21	50.23	0.22	0.13	0.06	1.486e-07	-5.74739	down
c107176.graph_c0	218	1416	1976	113	202	92	4.89	45.8	43.7	2.29	3.28	3.48	0.00134884	-2.4414	down
c107178.graph_c2	511	1497	2157	136	228	136	14.35	47.22	58.34	2.89	4.73	3.45	8.64073e-06	-2.46375	down
c107180.graph_c1	623	4044	4033	387	289	404	10.92	36.63	32.91	7.36	4	7.88	0.00787847	-2.14066	down
c107185.graph_c0	152	5792	8417	135	394	70	1.32	56.83	61.39	0.78	2.2	0.48	0.00115222	-3.52444	down
c107192.graph_c1	20	131	122	8	8	7	0.95	4.86	4.13	0.24	0.21	0.22	0.000727152	-2.73575	down
c107220.graph_c0	27	99	54	1346	6065	454	0.27	0.86	0.41	12.81	41.17	3.78	1.93787e-10	5.11809	up
c107235.graph_c0	14	10086	12126	36	25	4	0.12	91.43	95.03	0.27	0.17	0.04	4.39418e-06	-5.73672	down
c107247.graph_c0	4	15	9	68	194	40	0.54	2.19	1.16	8.24	22.87	5.65	1.05274e-06	3.48404	up
c107262.graph_c0	15	246	176	624	2030	253	0.22	3.99	2.49	8.21	25.87	3.95	0.00437418	2.78506	up
c107264.graph_c0	110	370	401	1120	3190	292	1.79	6.31	6.77	15.58	42.98	4.85	0.00325577	2.44424	up
c107267.graph_c0	113	1139	1220	83	72	51	3.63	39.53	37.05	2.36	1.98	1.77	0.00120088	-2.70554	down
c107267.graph_c2	87	108	106	304	643	149	3.99	4.64	4.45	10.74	24.56	6.75	0.00150887	1.96256	up
c107274.graph_c0	70	198	280	552	1631	251	1.6	4.71	5.91	10.74	31.31	5.78	0.00186639	2.29424	up
c107285.graph_c1	137	2277	1653	80	178	90	2.28	41.57	24.93	1.17	1.91	1.44	0.00269854	-2.68776	down
c107292.graph_c0	221	1286	1879	100	195	153	2.53	11.9	17.28	0.7	1.07	1.44	0.00766142	-2.14336	down
c107317.graph_c0	22	192	130	9	7	5	2.91	10.48	6.88	0.63	0.47	0.74	0.000216075	-3.12676	down
c107327.graph_c1	38	405	413	11	52	23	1.94	19.7	17.3	0.42	1.88	0.96	0.00681631	-2.52218	down
c107347.graph_c0	3	33	49	2201	5938	1021	0.02	0.23	0.21	9.17	25.46	4.79	2.77252e-16	6.47631	up
c107360.graph_c1	212	729	722	1363	3228	574	2.67	10.11	7.94	13.29	29.8	6.54	0.00737019	1.8622	up
c107367.graph_c0	290	12190	14739	265	516	161	2.37	108.54	114.26	1.87	3.61	1.99	0.000352473	-3.71709	down
c107367.graph_c2	56	15070	15630	55	48	12	2.37	557.72	507.19	2.6	2.26	0.53	4.15886e-07	-5.85601	down
c107374.graph_c0	71	394	454	45	69	37	2.34	7.27	6.42	1.03	1.04	0.72	0.00668952	-1.94809	down
c107375.graph_c1	196	277	160	36	69	32	3.49	5.37	3.47	0.63	1.64	0.7	0.00285939	-1.86722	down
c107388.graph_c1	125	1571	1894	26	54	76	3.35	41.1	41.33	0.6	1.25	2.15	0.000505985	-3.34112	down
c107402.graph_c0	95	576	620	32	85	40	0.96	8.33	8.24	0.34	0.74	0.43	0.00138399	-2.37119	down
c107403.graph_c1	180	912	683	100	125	102	12.84	32.67	22.42	9.07	6.31	8.65	0.00716756	-1.76779	down
c107408.graph_c0	0	6	6	245	927	108	0	0.07	0.06	2.37	8.69	1.24	1.17876e-12	6.21299	up
c107409.graph_c2	0	0	0	43	158	19	0	0	0	5.59	20.04	2.87	1.66614e-08	6.61631	up
c107411.graph_c1	402	1077	967	179	340	157	11.83	26.09	19.76	4.52	7.75	5.22	0.00206238	-1.40955	down
c107414.graph_c3	48	695	1227	35	58	35	2.06	32.23	50.18	1.33	2.18	1.58	0.00219291	-2.95801	down
c107417.graph_c1	207	234	347	40	44	37	7.97	10.64	13.28	1.29	1.53	1.66	0.000100258	-2.22207	down
c107421.graph_c0	33	277	200	18	39	13	0.77	6.81	4.36	0.36	0.78	0.31	0.00625513	-2.20691	down
c107424.graph_c3	2	444	1007	7	33	9	0.02	5.26	11.55	0.2	0.31	0.09	0.00797798	-3.4398	down
c107428.graph_c0	26	120	92	247	671	79	0.63	4.71	3.82	3.9	10.28	1.48	0.00729814	2.1992	up
c107431.graph_c0	23	57	29	121	574	62	0.74	2.01	0.89	3.47	15.94	2.11	0.00133975	2.69933	up
c107448.graph_c2	129	235	278	2	12	18	20.48	9.16	9.12	0.1	1.51	1.47	7.68317e-05	-3.42742	down
c107451.graph_c0	3	70	98	1029	660	604	0.03	1.96	1.95	28.2	18.82	18.37	3.17686e-05	3.94362	up
c107455.graph_c0	48	1694	1796	34	59	25	3.07	113.84	106.07	1.86	3.11	1.66	0.000183747	-3.76131	down
c107456.graph_c0	395	578	646	147	133	113	3.96	9.71	5.42	0.93	1.67	0.86	0.00354168	-1.56608	down
c107460.graph_c0	131	326	397	804	1746	516	1.35	3.88	4.62	7.91	19.62	6.01	5.75062e-05	2.12717	up
c107461.graph_c4	465	5971	6570	321	839	229	18.47	220.82	215.28	8.86	20.39	7.16	0.00599701	-2.49468	down
c107465.graph_c0	476	4720	5776	270	559	243	3.72	39.25	39.3	1.85	3.57	1.99	0.00192584	-2.5868	down
c107466.graph_c1	191	861	825	120	178	104	4.81	22.81	17.19	2.67	2.94	2.56	0.00879901	-1.6243	down
c107471.graph_c1	274	2548	666	41	67	81	14.69	82.35	32.49	1.95	3.18	3.34	0.000253565	-3.19091	down
c107471.graph_c3	98	751	780	2630	7149	1070	8.19	71.51	63.34	176.21	468.2	85.23	0.000646837	2.8642	up
c107472.graph_c2	10	15	19	69	275	27	0.33	0.55	0.64	2.07	7.92	0.95	0.000511985	2.93455	up
c107482.graph_c0	2113	2435	3719	685	534	508	28.95	56.92	77.41	9.54	6.42	8.48	0.00370795	-1.75683	down
c107489.graph_c0	41	4599	5789	76	228	48	0.43	53.56	59.92	0.71	2.54	0.53	0.002035	-3.6281	down
c107493.graph_c0	152	4087	3798	198	388	92	2.2	72.91	59.22	2.42	4.65	1.33	0.0080975	-2.69846	down
c107503.graph_c0	78	497	715	36	16	42	2.37	15.25	17.79	0.96	0.41	1.31	0.00379216	-2.69977	down
c107517.graph_c1	9	13	13	78	35	70	0.5	0.74	0.7	4.04	1.66	4.18	0.000796027	2.7032	up
c107529.graph_c0	496	1097	1180	142	215	152	5.37	12.9	12.14	1.36	1.99	1.72	1.92871e-05	-1.93338	down
c107532.graph_c1	143	305	258	477	859	277	1.46	3.39	2.5	4.29	7.48	2.96	0.0021507	1.47913	up
c107534.graph_c0	604	5682	5433	197	216	339	12.27	108.09	81.2	3.08	2.47	6.34	0.000748051	-2.92122	down
c107536.graph_c0	9	4125	4422	18	27	7	0.39	35.11	33.2	0.13	0.21	0.06	1.20112e-05	-5.26996	down
c107541.graph_c0	58	10742	11322	61	124	58	0.29	59.5	55.9	0.27	0.54	0.49	2.62426e-05	-4.79888	down
c107543.graph_c0	496	1394	1338	157	291	118	3.68	13.63	12.27	1.72	1.66	0.97	6.21891e-06	-2.05137	down
c107544.graph_c1	380	674	817	54	116	27	88.17	15.25	26.37	7.89	13.7	5.5	7.62967e-08	-2.86139	down
c107553.graph_c0	58	672	746	35	57	47	0.65	7.67	7.12	0.31	0.52	0.54	0.00501184	-2.50484	down
c107554.graph_c0	16	4202	5636	42	75	26	0.09	24.95	29.44	0.2	0.34	0.16	0.0002361	-4.41423	down
c107559.graph_c0	70	3548	4963	84	163	114	0.55	103.85	120.05	1.61	1.51	2.45	0.00251015	-3.32376	down
c107560.graph_c0	28	222	273	18	35	13	5.07	44.03	47.71	2.98	5.63	2.49	0.00684738	-2.27949	down
c107560.graph_c3	546	9485	12449	429	499	331	3.45	65.78	76.09	2.38	2.67	2.19	0.000734167	-3.14184	down
c107570.graph_c2	1	4418	5312	31	19	0	0.01	36.33	37.13	0.19	0.18	0	0.00346059	-4.30922	down
c107577.graph_c0	197	253	283	510	757	455	2.14	3	2.93	4.89	7.02	5.19	0.00139658	1.53689	up
c107582.graph_c1	482	1345	1694	265	370	257	12.43	37.74	41.48	6.05	8.18	6.96	0.00989683	-1.42158	down
c107583.graph_c0	69	53	119	0	0	0	7.78	3.64	9.06	0	0	0	1.73561e-08	-6.52191	down
c107588.graph_c0	174	262	318	641	1118	275	2.09	3.99	3.63	8.44	11.47	3.8	0.00474837	1.63348	up
c107596.graph_c0	172	4392	3537	246	370	102	3.3	81.69	63.44	3.93	5.88	1.85	0.00874656	-2.62135	down
c107610.graph_c0	468	1146	943	1819	3503	1092	4.4	11.69	8.41	15.07	28.09	10.75	0.00076046	1.62278	up
c107614.graph_c0	125	4358	6387	75	86	31	1.01	39.72	51.48	0.53	0.6	0.77	8.33258e-06	-4.50489	down
c107618.graph_c1	427	1210	755	213	191	168	3.31	10.79	5.58	1.49	1.43	1.37	0.00878923	-1.49811	down
c107623.graph_c0	193	260	325	636	865	309	3.59	5.22	5.77	11.48	14.33	6.12	0.00501215	1.47431	up
c107628.graph_c0	8	48	24	659	3386	346	0.2	1.58	0.63	16.05	85.06	11.64	1.5573e-11	5.45798	up
c107630.graph_c0	212	114	133	4	14	1	8.01	6.44	6.62	0.12	0.66	0.05	6.12223e-06	-4.14432	down
c107640.graph_c0	784	2563	2887	233	578	251	8.26	33.69	30.7	2.39	5.36	3.1	0.000305277	-2.04007	down
c107658.graph_c1	35	41	20	315	904	136	1.51	0.79	1.56	6.09	16.13	2.77	3.23915e-06	3.58121	up
c107676.graph_c0	73	32	340	9	0	3	1.12	0.58	5.79	0.16	0	0.05	0.00258649	-3.68124	down
c107695.graph_c0	812	1239	1475	282	568	204	15.34	26.3	26.8	4.59	9.06	4.3	0.00325577	-1.4102	down
c107707.graph_c0	21	288	370	19	27	9	0.8	5.49	6.37	1.16	0.62	0.31	0.00355856	-2.75938	down
c107712.graph_c3	37	249	444	26	35	16	2.49	18.26	28.54	1.56	2.04	1.13	0.00404201	-2.46698	down
c107716.graph_c0	492	1794	1285	2944	6536	1262	3.34	15.47	9.98	21.03	43.7	10.21	0.00627112	1.82983	up
c107722.graph_c1	1140	2502	3169	472	708	314	14.48	35.42	35.82	4.87	8.02	3.65	9.8178e-05	-1.73761	down
c107726.graph_c3	19	54	64	5	9	8	5.56	17.42	18.25	1.37	2.4	2.49	0.00839259	-2.00103	down
c107740.graph_c1	44	685	768	46	42	21	1.14	25.45	30.64	1.06	0.92	0.57	0.0024058	-2.839	down
c107751.graph_c0	94	1377	1536	34	59	47	1.98	25.42	32.92	0.73	1.04	1.31	0.000152435	-3.39093	down
c107758.graph_c0	30	91	163	12	21	3	3.05	10.08	15.87	1.08	1.83	0.32	0.00418172	-2.3965	down
c107758.graph_c1	87	154	190	332	584	141	3.89	7.46	8.01	13.08	22.22	6.55	0.00992181	1.52862	up
c107765.graph_c0	749	3642	1211	149	241	245	43.62	215.99	61.39	5.46	9.22	14.18	0.00139658	-2.38741	down
c107774.graph_c0	83	151	129	388	786	196	5.07	10.04	7.52	21.13	41.49	12.58	0.000115781	2.10158	up
c107774.graph_c1	166	372	315	728	1758	479	1.31	5.18	2.46	5.2	12.43	4.03	9.55608e-05	2.02712	up
c107777.graph_c0	54	14	20	497	2100	256	2.3	0.21	0.59	5.93	24.25	3.98	1.75301e-05	4.18516	up
c107785.graph_c0	357	2114	2674	228	443	193	4.56	29.65	32.08	2.58	4.84	2.58	0.00906521	-1.93782	down
c107797.graph_c0	14	1321	2749	20	61	11	0.2	20.89	38.02	0.26	0.76	0.17	0.000652682	-4.05596	down
c107815.graph_c0	249	595	602	116	100	98	4.65	10.8	8.63	1.92	1.62	2.17	0.00378092	-1.6193	down
c107815.graph_c1	118	2256	1787	116	184	102	0.95	22.72	13.4	1.08	1.24	0.85	0.00752328	-2.48768	down
c107819.graph_c0	103	2245	2474	32	37	106	5.29	113.49	113.98	1.08	1.33	4.52	0.00222372	-3.32959	down
c107822.graph_c0	31	88	76	221	729	100	0.49	1.43	1.09	3.27	9.45	1.74	0.000608887	2.50595	up
c107823.graph_c3	1047	1405	1133	6615	9194	3778	25.24	36.84	26	141.13	189.87	95.57	4.80067e-08	2.63912	up
c107844.graph_c0	64	135	172	589	1536	245	1.92	4.07	3.86	16.09	41.04	8.34	2.53417e-05	2.77573	up
c107846.graph_c0	612	20	410	14433	16471	24266	6.9	0.25	4.38	143.25	158.3	286.17	1.09829e-05	4.86987	up
c107850.graph_c0	48	276	1382	54	34	15	1.56	10.95	61.21	1.62	1.51	0.58	0.00656984	-2.96136	down
c107866.graph_c0	151	3937	4141	127	266	126	3.13	88.61	81.56	2.32	4.73	2.74	0.00231329	-3.00448	down
c107867.graph_c0	166	311	342	669	1250	269	3.9	7.95	7.65	13.91	25.18	6.64	0.00691197	1.62846	up
c107879.graph_c0	232	3429	3775	91	191	80	1.45	23.23	22.37	0.5	1.02	0.52	7.45329e-05	-3.44712	down
c107883.graph_c0	55	1108	1161	20	30	10	0.44	9.97	9.04	0.17	0.2	0.1	5.21552e-06	-4.18862	down
c107887.graph_c0	4	37	36	100	413	41	0.11	1.14	0.97	2.5	10	1.22	0.00294869	2.83193	up
c107887.graph_c1	1210	4519	4522	651	1229	472	8.54	34.54	30.04	3.96	7.19	3.43	0.00402981	-1.62464	down
c107888.graph_c0	200	14039	4678	22	233	20	1.62	124.3	37.04	0.17	1.63	0.18	5.13197e-05	-4.6798	down
c107889.graph_c0	177	356	250	548	1118	367	1.9	4.15	2.55	5.18	10.23	4.12	0.00124214	1.62567	up
c107896.graph_c1	28	3252	3419	3	1	1	1.37	51.47	47.01	0.04	0.01	0.02	4.15527e-11	-7.34077	down
c107900.graph_c0	10	184	237	8	23	6	0.73	14.06	17.07	0.5	1.31	0.41	0.00978682	-2.67744	down
c107900.graph_c2	341	417	694	67	91	44	16.9	22.5	32.73	2.95	3.92	2.29	1.72906e-06	-2.41998	down
c107906.graph_c0	0	6	35	170	380	90	0	0.15	0.78	3.52	7.61	2.23	0.000847251	3.73127	up
c107906.graph_c1	185	2192	2533	138	266	149	2.56	37.33	34.89	1.13	2.42	1.44	0.00823593	-2.33546	down
c107919.graph_c1	91	2744	3448	148	187	52	1.05	38.04	44.5	1.48	1.93	0.61	0.00404298	-3.0137	down
c107935.graph_c1	1	4	2	627	1674	215	0.05	0.2	0.09	25.12	64.97	10.18	4.68153e-22	7.75897	up
c107938.graph_c2	143	86	101	1308	4729	544	3.85	2.52	2.59	31.2	109.16	15.39	3.25112e-06	3.86671	up
c107938.graph_c3	28	356	464	6	2	8	0.56	6.44	7.27	0.21	0.03	0.16	3.17686e-05	-4.22243	down
c107941.graph_c2	24	7457	10010	140	373	46	0.22	84.78	100.27	1.15	2.97	0.45	0.00566337	-3.55286	down
c107943.graph_c0	139	843	1917	125	34	64	3.43	22.59	44.94	2.72	0.72	1.65	0.00956768	-2.61918	down
c107949.graph_c0	211	9732	9422	333	473	140	2.22	182.02	153.66	2.29	3.16	1.15	0.00204738	-3.27265	down
c107961.graph_c0	4	20	42	574	1788	301	0.04	0.28	0.43	5.65	18.33	3.68	2.61675e-11	5.19468	up
c107965.graph_c0	73	177	423	11	13	28	1	3.42	6.71	0.13	0.8	0.98	0.0025018	-2.71331	down
c107968.graph_c0	629	3376	4232	167	168	259	4.32	25.12	31.57	1.01	0.99	2.15	0.000297127	-2.85175	down
c107969.graph_c0	26	1919	2127	25	56	19	0.3	17.68	16.87	0.16	0.4	0.26	0.000233568	-4.03391	down
c107974.graph_c0	697	1973	2233	336	336	344	9.71	45.23	49	3.76	5.74	4.23	0.00615788	-1.63443	down
c107983.graph_c2	30	1833	2238	16	10	13	0.32	22.29	24.09	0.16	0.09	0.15	3.60852e-06	-4.96484	down
c107991.graph_c0	22	2135	2088	16	9	2	0.13	13.96	11.02	0.09	0.04	0.02	2.45974e-06	-5.35251	down
c107994.graph_c0	69	10471	15436	396	584	208	0.27	45.68	58.93	1.4	2.26	1.81	0.00986498	-3.1569	down
c108005.graph_c0	307	876	827	1233	1595	799	0.99	3.26	2.64	3.63	4.59	2.69	0.00675266	1.27604	up
c108038.graph_c0	0	36	26	3184	9033	1279	0	1.85	1.17	133.81	367.68	63.5	1.28626e-12	6.93758	up
c108039.graph_c0	25	3612	5417	11	24	15	1.88	296.29	389.63	0.74	1.56	1.19	9.61766e-07	-5.51322	down
c108040.graph_c0	159	453	411	884	2157	480	6.25	19.37	15.39	30.84	72.87	19.81	0.000689086	2.01538	up
c108080.graph_c0	3	783	740	7071	20452	2179	0.38	107.91	89.64	806.05	2261.46	289.79	0.00247286	3.75715	up
c108085.graph_c0	19	57	71	7	8	7	5.03	16.58	18.27	1.72	1.92	1.97	0.00547885	-2.08441	down
c44861.graph_c0	0	0	0	209	532	93	0	0	0	25.51	63.1	13.25	7.21054e-16	8.35217	up
c44978.graph_c0	0	2	7	1593	5445	735	0	0.08	0.23	49.43	163.52	26.97	3.54925e-25	8.78844	up
c44980.graph_c0	10	9	13	93	220	28	0.49	0.48	0.6	4.03	9.25	1.43	4.41521e-05	3.2585	up
c44988.graph_c0	79	4981	5992	84	228	58	2.96	203.4	214.24	2.8	7.35	2.28	0.000734167	-3.71544	down
c44989.graph_c0	35	241	112	2	21	10	2.71	20.68	8.58	0.14	1.41	0.82	0.00331949	-2.76587	down
c44992.graph_c0	67	327	447	835	2897	297	3.73	19.86	23.72	41.36	139.05	17.35	0.00924618	2.34021	up
c45061.graph_c0	42	359	345	18	34	3	5.89	55.1	46.66	2.29	4.2	0.44	0.00122427	-3.01129	down
c45960.graph_c0	1	0	3	4487	975	264	0.08	0	0.22	309.7	65.2	21.42	7.21895e-16	8.44093	up
c56376.graph_c0	0	0	0	435	838	77	0	0	0	61.82	113.84	12.63	3.58819e-16	8.59953	up
c60166.graph_c0	17	23	12	135	62	204	2.81	4.16	1.91	20.33	9.06	35.62	0.000421821	3.15345	up
c61717.graph_c0	45	94	78	140	220	91	15.34	35.28	26	45.01	69	33.05	0.00380313	1.38193	up
c62162.graph_c0	282	179	120	795	1861	483	27.77	19.24	11.32	70.44	159.66	50.09	0.00768541	2.23947	up
c63034.graph_c0	0	4	0	272	709	96	0	0.95	0	54.31	137.72	22.05	1.07378e-13	7.05211	up
c64156.graph_c0	0	1	0	215	510	74	0	0.38	0	70.94	164.23	27.55	3.75315e-15	7.73188	up
c65312.graph_c0	633	8629	8639	302	415	270	43.81	648.88	569.75	18.61	24.94	19.58	0.000125286	-3.239	down
c66737.graph_c0	9	17	18	4857	15934	1709	0.94	1.93	1.79	453.93	1444.02	187.1	9.3368e-35	8.46833	up
c66967.graph_c0	8	25	16	70	184	39	1.27	4.33	2.44	10.07	25.83	6.51	7.17149e-05	2.71447	up
c67205.graph_c0	34	165	274	15	15	9	6.16	32.73	47.89	2.48	2.41	1.72	0.00040144	-2.8063	down
c67901.graph_c0	10	20	5	5	647	74	0.37	0.8	0.18	0.16	20.44	2.86	0.00518253	3.49234	up
c67907.graph_c0	8	322	623	6	27	10	0.57	24.93	42.36	0.38	1.66	0.75	0.00433776	-3.29137	down
c69243.graph_c0	3	37	22	397	1215	146	0.28	3.75	1.96	33.08	98.11	14.27	2.89964e-08	4.67597	up
c69661.graph_c0	0	1	1	513	2015	258	0	0.18	0.16	77.25	294.73	45.05	6.49737e-22	8.79412	up
c69755.graph_c0	24	73	73	134	255	101	4.15	13.84	12.19	21.17	39.11	18.48	0.000342294	1.87673	up
c71974.graph_c1	91	207	174	642	1808	297	7.36	18.26	13.46	46.54	126.91	25.28	4.40166e-05	2.63533	up
c72367.graph_c0	16	19	21	1672	5014	671	0.6	0.77	0.75	55.44	160.93	26.31	8.26653e-24	6.67079	up
c72374.graph_c0	33	107	110	170	519	105	2.33	8.24	7.43	10.73	31.77	7.8	0.00674056	1.87982	up
c72991.graph_c0	124	305	298	1222	2309	619	5.09	13.72	11.7	44.54	81.63	26.67	2.27601e-08	2.75874	up
c73101.graph_c0	27	40	48	252	582	121	1.48	2.39	2.51	12.3	27.53	6.97	1.19556e-07	3.13219	up
c73101.graph_c1	27	42	32	206	528	111	2.04	3.45	2.31	13.9	34.52	8.81	4.59513e-07	3.10097	up
c73353.graph_c0	0	6	9	851	2690	216	0	1.98	2.64	239.49	737.53	69.04	3.29222e-15	7.16717	up
c73978.graph_c0	92	196	173	336	518	205	6.03	13.99	10.89	19.65	29.35	14.12	0.0005166	1.52862	up
c74225.graph_c0	28	107	102	10	15	6	5.41	22.65	19.04	1.77	2.58	1.23	0.000609644	-2.34124	down
c74362.graph_c0	3	2	11	47	22	163	0.19	0.26	0.67	3.37	1.2	10.85	0.000563753	3.85655	up
c74693.graph_c0	74	128	56	514	1320	267	1.89	3.55	1.37	11.61	28.87	7.16	1.12059e-05	3.00624	up
c75250.graph_c0	1	1	2	893	1833	271	0.21	0.23	0.41	172.73	344.51	60.35	1.8522e-25	8.53806	up
c75944.graph_c0	18	835	756	20	31	9	4.26	182.45	172.73	4.37	6.59	2.26	0.000685051	-3.59414	down
c76655.graph_c0	10	21	13	58	157	25	0.87	2	1.09	4.55	11.94	2.3	0.00102134	2.48355	up
c76827.graph_c0	3	15	10	51	164	26	0.41	2.23	1.31	6.29	19.62	3.73	0.000101213	3.13362	up
c76938.graph_c0	23	45	52	8	8	6	7.35	15.82	16.22	2.4	2.34	2.04	0.00721603	-1.89994	down
c77452.graph_c0	1	2	1	1570	4313	491	0.09	0.2	0.09	127.1	341.53	46.65	5.33983e-29	9.34686	up
c77702.graph_c0	278	352	185	2093	1026	2890	8.78	12.13	5.57	58.62	27.82	95.84	0.000254473	3.09157	up
c77724.graph_c0	0	1	0	121	227	19	0	0.03	0	2.55	4.64	0.48	1.25496e-09	6.59652	up
c77924.graph_c0	1	0	0	1323	3346	330	0.21	0	0	259.99	638.85	74.6	2.07562e-24	9.58909	up
c78644.graph_c1	17	31	12	91	1293	28	1.64	3.27	1.11	7.91	108.94	2.85	0.00104628	3.73258	up
c78937.graph_c0	34	65	50	123	167	64	3.47	7.25	4.9	11.3	14.87	6.89	0.00388354	1.54102	up
c79115.graph_c0	31	20	41	2	0	0	0.76	0.54	0.97	0.04	0	0	0.000241096	-4.18515	down
c79224.graph_c1	1	72	101	724	1985	261	0.02	1.41	1.71	11.46	30.42	4.92	0.000558779	3.81758	up
c79293.graph_c0	3	3	0	3912	12086	1605	0.2	0.31	0	240.25	744.42	116.62	7.27943e-33	10.0004	up
c79371.graph_c0	0	4	9	958	3141	422	0	0.25	0.5	49.99	158.71	25.95	4.1477e-20	7.73857	up
c79464.graph_c0	95	84	116	652	2079	301	3.21	3.09	3.73	19.52	60.26	10.66	1.12859e-05	3.20329	up
c79478.graph_c0	6	2299	2488	73	13	8	0.2	84.38	79.95	2.18	0.38	0.28	0.00549124	-3.72193	down
c79611.graph_c0	16	188	157	1266	4543	413	1.06	13.61	9.92	74.75	259.91	28.72	1.74022e-05	3.96473	up
c79989.graph_c0	152	547	1088	51	82	79	12.93	51.02	89.15	3.89	6.12	7.27	0.00350593	-2.28874	down
c80230.graph_c0	35	88	41	734	2456	300	0.93	2.54	1.03	17.22	55.79	8.37	3.77848e-09	4.26088	up
c80233.graph_c0	4	1240	1714	11	26	1	0.16	55.38	67.04	0.4	0.92	0.04	0.000633285	-4.4193	down
c80311.graph_c0	104	306	206	2228	7815	937	2.79	8.94	5.27	53.07	180.21	26.46	4.76305e-09	4.08608	up
c80495.graph_c0	30	27	27	106	180	58	5.26	5.02	4.42	16.42	27.08	10.41	0.00124168	2.11582	up
c80495.graph_c1	66	55	49	188	315	133	12.49	11.4	8.95	32.57	53.01	26.62	0.00285939	1.98219	up
c80544.graph_c0	1	22	28	704	88	287	0.08	1.96	2.18	51.37	6.22	24.61	3.70272e-05	4.4006	up
c80620.graph_c0	167	221	286	1114	3919	421	14.73	21.26	24.14	88.14	300.37	39.11	0.000137492	2.91128	up
c81375.graph_c0	0	0	2	167	2222	83	0	0	0.4	31.54	407.65	18.07	1.71103e-11	7.57051	up
c81515.graph_c2	496	216	77	1	6	24	36.71	17.43	5.45	0.07	0.38	1.87	0.00563143	-3.47819	down
c81553.graph_c0	2	2151	2441	16	52	8	0.2	240.39	239.43	1.47	4.64	0.86	0.00172791	-4.1142	down
c81683.graph_c0	0	34	28	1228	4127	556	0	0.91	0.66	26.84	87.28	14.4	4.96569e-09	5.90834	up
c81878.graph_c0	19	440	704	13	10	5	5.62	143.31	202.92	3.6	2.69	1.57	7.02701e-05	-4.07949	down
c82138.graph_c0	0	17	27	166	428	60	0	0.54	0.74	4.27	10.69	1.83	0.000460136	3.70961	up
c82230.graph_c0	390	510	559	117	172	110	10.45	14.87	14.26	2.78	3.95	3.09	0.0031145	-1.47879	down
c82231.graph_c0	0	1	3	1926	6125	703	0	0.13	0.33	201.89	622.77	86.12	1.24852e-29	9.71246	up
c82268.graph_c0	22	196	276	2	0	7	4.66	45.53	56.35	0.39	0	1.57	0.000759142	-3.94088	down
c82274.graph_c0	7	53	95	286	932	82	0.37	3.04	4.77	13.4	42.29	4.53	0.0021392	3.01738	up
c82279.graph_c0	36	1033	1383	24	10	32	1.57	48.93	57.37	0.93	0.37	1.46	0.000829491	-3.67674	down
c82291.graph_c0	23	12550	15541	12	1	3	0.69	410.97	445.49	0.32	0.03	0.09	3.56518e-08	-6.82817	down
c82300.graph_c1	0	3	5	317	1129	117	0	0.25	0.36	21.54	74.33	9.35	7.28285e-15	6.87618	up
c82311.graph_c0	0	0	1	200	368	52	0	0	0.34	65.72	117.8	19.45	1.24897e-13	7.41833	up
c82387.graph_c0	24	669	747	17	8	19	3.04	93.71	92.14	1.98	0.87	2.53	0.000740312	-3.59953	down
c82395.graph_c0	41	296	228	0	3	5	5.71	43.16	30.15	0	0.37	0.73	9.56155e-07	-4.72677	down
c82417.graph_c0	1	10	10	4640	14864	1877	0.03	0.37	0.32	140.2	434.87	67.13	4.44503e-35	9.32312	up
c82421.graph_c0	70	179	201	321	954	194	2.49	6.8	6.8	10.02	29.1	7.12	0.00356817	1.90354	up
c82431.graph_c3	9	56	55	149	356	60	0.58	3.97	3.36	8.51	19.69	4.04	0.00246603	2.42438	up
c82432.graph_c0	115	487	555	1088	2879	387	3.92	18.05	18.04	32.89	84.24	13.86	0.00945358	2.08486	up
c82436.graph_c0	1	34	22	2413	7471	866	0.04	1.32	0.75	76.45	229.22	32.47	2.44e-15	6.97504	up
c82461.graph_c0	7934	3601	725	209	258	444	650.52	321.92	56.86	15.34	18.36	38.3	0.00615788	-3.06404	down
c82464.graph_c0	79	372	414	35	60	30	3.64	18.64	18.17	1.43	2.38	1.45	0.000993352	-2.16732	down
c82471.graph_c0	47	121	117	237	506	127	7.5	21.24	18.04	34.4	71.3	21.4	0.00105493	1.86575	up
c82478.graph_c0	0	4	8	38	118	18	0	0.33	0.58	2.59	7.8	1.44	0.000132776	3.704	up
c82523.graph_c0	1	30	5	5602	20256	2579	0.04	1.26	0.18	192.51	674.1	104.83	1.61896e-21	8.60279	up
c82550.graph_c0	0	0	1	96	250	36	0	0	0.08	7.2	18.18	3.17	3.28753e-11	6.82281	up
c82564.graph_c0	30	7979	10857	20	4	17	0.99	265.91	316.74	0.54	0.12	0.55	6.39462e-07	-5.99705	down
c82565.graph_c0	38	14525	10595	24	13	3	3	1249.79	799.64	1.69	0.89	0.25	2.91297e-08	-6.52516	down
c82598.graph_c0	4308	1252	428	11	0	88	775.19	246.8	74.31	1.81	0	16.74	0.0087186	-3.79784	down
c82600.graph_c0	23	218	194	14	6	12	1.98	20.47	15.99	1.08	0.45	1.09	0.00381849	-2.7161	down
c82605.graph_c0	32	31	33	7	3	1	3.58	3.78	3.54	0.7	0.29	0.12	0.00743711	-2.5455	down
c82611.graph_c0	1	4	4	7021	19196	2148	0.09	0.39	0.34	564.44	1495.81	202.63	4.08919e-43	10.5923	up
c82658.graph_c0	237	203	172	1808	3333	727	8.11	7.56	5.61	54.86	97.95	26.11	5.03002e-06	3.14828	up
c82671.graph_c0	21	318	120	1317	2320	372	0.87	14.38	4.75	48.56	82.81	16.21	0.00042997	3.22518	up
c82679.graph_c0	0	5	8	6472	20622	1777	0	0.3	0.43	321.59	992.53	104.16	1.48366e-30	9.90068	up
c82682.graph_c0	0	17	21	718	5132	309	0	1.29	1.4	44.75	309.98	22.67	5.11332e-09	6.24093	up
c82720.graph_c0	37	214	316	2969	8804	1254	2.5	17.46	22.73	201.77	579.48	100.05	1.20957e-08	4.47368	up
c84750.graph_c0	151	213	249	435	844	222	12.94	19.91	20.42	33.41	62.83	20.02	0.00921876	1.48564	up
c84760.graph_c0	37	173	218	765	1919	374	1.48	7.49	8.29	27.15	65.71	15.69	2.83107e-05	3.01297	up
c84872.graph_c1	113	155	136	505	1208	225	8.8	13.27	10.24	35.57	82.54	18.63	0.000379432	2.30678	up
c84904.graph_c0	54	132	107	267	727	133	4.56	12.17	8.65	20.22	53.37	11.83	0.00124368	2.09538	up
c84936.graph_c0	4	44	47	226	685	51	0.18	2.15	2.01	9.03	26.5	2.41	0.000922097	3.25189	up
c84990.graph_c0	355	352	472	73	161	64	16.52	17.8	20.91	3.02	6.44	3.12	0.00418685	-1.68899	down
c85084.graph_c0	25	94	160	2	5	7	3.1	12.84	19.04	0.22	0.54	0.91	0.000189988	-3.32647	down
c85133.graph_c0	54	114	108	289	498	140	5.12	11.78	9.75	24.55	40.96	13.92	0.000110753	2.00335	up
c85209.graph_c0	0	9	9	63	143	25	0	0.36	0.37	1.63	4.11	0.71	6.28673e-05	3.6597	up
c85356.graph_c0	1	20	10	175	392	73	0.02	0.52	0.21	8.13	17.13	3.38	1.34629e-07	4.34473	up
c85359.graph_c0	67	1470	1299	40	79	32	2.13	50.88	39.37	1.16	2.16	1.07	0.000468641	-3.2735	down
c85362.graph_c0	24	47	37	1258	2754	454	3.37	7.21	4.99	160.01	339.9	67.23	5.74595e-19	5.3007	up
c85384.graph_c0	56	99	95	260	779	110	6.83	13.19	11.12	28.62	83.18	14.14	0.00163553	2.24373	up
c85412.graph_c0	25	142	39	261	731	139	5.76	35.91	8.71	55.54	151.25	33.95	0.00153816	2.58497	up
c85494.graph_c1	34	127	198	6	15	11	1.14	4.64	6.33	0.18	0.43	0.39	0.000404812	-2.73892	down
c85517.graph_c0	34	441	720	7	24	6	5.33	75.69	111.33	1	3.32	1.04	2.75684e-05	-4.00374	down
c85595.graph_c0	127	259	297	616	1345	276	5.99	13.3	13.36	25.85	54.65	13.68	0.00159866	1.90863	up
c85614.graph_c0	1	7	3	450	1563	144	0.11	0.76	0.33	48.34	162.33	17.82	2.25916e-16	6.94293	up
c85634.graph_c0	92	488	551	62	57	52	26.79	156.25	156.26	16.87	15.1	16.09	0.0072417	-1.97806	down
c85998.graph_c0	338	2329	1993	209	349	221	25.64	192.59	144.55	14.18	22.95	17.63	0.0094784	-1.88877	down
c86078.graph_c0	0	0	0	152	1047	37	0	0	0	14.38	87.58	4.18	9.13531e-12	7.83016	up
c86226.graph_c0	105	723	749	85	65	36	6.15	44.66	40.36	4.24	3.1	2.1	0.00317395	-2.32116	down
c86328.graph_c1	31	183	128	311	872	138	0.73	4.69	2.87	6.48	17.59	3.41	0.00724064	2.14285	up
c86338.graph_c0	10	21	9	169	595	62	0.29	0.66	0.25	4.3	14.65	1.87	3.83775e-07	4.10545	up
c86532.graph_c0	33	76	115	12	14	12	1.6	4.02	5.33	0.52	0.59	0.61	0.0042859	-1.94933	down
c86578.graph_c0	93	245	343	21	45	33	15.56	44.87	55.45	3.35	6.66	6	0.000598931	-2.17498	down
c86614.graph_c0	36	81	48	373	1160	120	1.41	3.46	1.8	13.18	39.68	5.02	2.63605e-05	3.23334	up
c86663.graph_c0	329	363	257	838	1543	664	10.26	12.31	7.63	23.16	41.29	21.73	0.00315184	1.81285	up
c86682.graph_c0	604	605	397	4500	12269	1717	20.6	22.45	12.9	136.13	359.41	61.48	1.73699e-05	3.2907	up
c86700.graph_c0	7	32	54	101	346	46	0.69	3.44	5.1	8.94	29.77	4.77	0.00491618	2.48873	up
c86710.graph_c0	15	61	39	154	468	41	1.34	5.94	3.34	12.34	36.35	3.85	0.00319235	2.5451	up
c86737.graph_c0	5	15	20	1503	4225	569	0.1	0.32	0.38	26.3	71.54	11.82	1.0656e-24	7.01729	up
c86752.graph_c0	56	79	69	282	660	198	2.24	3.44	2.63	10	22.67	8.31	9.2018e-07	2.61483	up
c86759.graph_c0	89	300	297	844	2371	432	3.09	11.35	9.85	26.03	70.8	15.79	9.55964e-05	2.58357	up
c86818.graph_c0	58	185	149	386	1334	181	2.97	10.5	7.34	18.75	59.67	9.83	0.00143038	2.37104	up
c86820.graph_c1	13	220	240	752	2106	254	0.34	6.35	6.01	17.64	47.88	7.05	0.00635313	2.76074	up
c86834.graph_c0	27	31	58	78	108	528	1.23	1.54	2.53	3.17	4.25	25.36	0.00634413	2.89827	up
c86867.graph_c1	160	147	117	480	948	234	7.58	7.58	5.29	20.23	38.69	11.65	0.00603701	1.96193	up
c86923.graph_c0	2	3407	2865	17	129	23	0.14	167.97	122.51	1.36	10.16	2.22	0.00965319	-3.55558	down
c87016.graph_c0	19	47	34	141	430	69	2.8	7.58	4.83	18.87	55.42	10.71	7.7841e-05	2.74108	up
c87103.graph_c0	3	18	13	37	77	20	0.36	2.36	1.5	4.01	8.09	2.53	0.00378092	2.2187	up
c87159.graph_c2	230	12144	14256	229	122	231	5.37	319.75	329.12	4.82	2.32	5.58	0.000325658	-3.95315	down
c87193.graph_c0	16	22	17	62	196	26	2.57	3.86	2.63	9.05	27.79	4.41	0.00423123	2.30707	up
c87225.graph_c0	6	53	33	9242	27751	3487	0.22	2.08	1.14	296.11	860.97	132.23	3.2573e-29	8.32469	up
c87310.graph_c0	162	146	147	713	1775	302	5.83	5.72	5.04	22.78	54.92	11.42	0.000548366	2.52038	up
c87353.graph_c0	373	125	183	5234	10214	1423	10.59	3.92	4.95	190.43	348.52	57.33	6.11493e-06	4.04605	up
c87367.graph_c2	30	35	27	87	173	67	2.49	3.17	2.15	6.48	12.48	5.86	0.00119689	1.97807	up
c87404.graph_c0	693	897	808	2319	3215	1339	43.23	60.96	48.14	129.08	173.37	87.84	0.000572615	1.74247	up
c87490.graph_c0	7	6	13	16108	47134	5590	0.32	0.3	0.57	654.74	1855.5	268.48	8.15478e-50	10.5159	up
c87529.graph_c0	282	423	320	1325	3229	667	8.33	13.56	8.97	34.51	81.52	20.6	9.40321e-05	2.41052	up
c87578.graph_c0	2	35	9	7919	24717	3037	0.08	1.47	0.33	271.56	820.81	123.19	9.02043e-26	8.79508	up
c87613.graph_c0	24	98	82	7	7	5	2.47	11.03	8.09	0.65	0.63	0.54	0.000195323	-2.71865	down
c87676.graph_c0	4	226	262	2088	6364	809	0.07	4.58	4.62	34.09	100.58	15.67	0.000336311	3.93547	up
c87753.graph_c0	180	2674	1988	86	128	29	5.31	87.56	56.89	2.25	3.37	0.9	8.76901e-05	-3.44713	down
c87866.graph_c0	11	203	227	1005	3922	397	0.89	17.83	17.49	72.46	274.07	33.64	0.000655553	3.45967	up
c87888.graph_c0	206	369	347	911	1982	479	8.91	17.37	14.3	34.99	73.77	21.75	0.000147651	2.05351	up
c87888.graph_c1	152	237	190	628	1148	329	7.65	12.98	9.12	28.11	49.77	17.43	0.00012875	2.03893	up
c87902.graph_c0	142	184	236	405	1020	240	5.78	8.15	9.15	14.64	35.7	10.26	0.00557428	1.70316	up
c87932.graph_c0	153	499	594	1042	3180	459	7.98	27.29	28.6	45.74	135.22	23.79	0.00654455	2.06514	up
c87967.graph_c0	0	9	10	922	2705	357	0	0.25	0.24	20.74	58.93	9.55	1.52383e-17	7.1669	up
c87973.graph_c0	202	341	199	1063	1601	779	7.45	13.7	6.99	34.8	50.75	30.2	7.60588e-07	2.45245	up
c87981.graph_c0	280	764	865	1476158	691751	868334	9.6	28.41	28.16	44712.8	20336.6	31246.6	5.88487e-75	10.6368	up
c87996.graph_c0	83	36	27	241	254	439	3.63	1.71	1.13	9.36	9.61	20.18	0.00830381	2.59551	up
c87999.graph_c0	25	142	236	13	6	13	1.58	7.66	12.09	0.77	0.49	0.58	0.00525978	-2.62803	down
c88005.graph_c0	33	41	39	153	615	72	0.68	0.93	0.77	2.8	10.91	1.57	0.000568172	2.74675	up
c88011.graph_c0	1	10405	1869	9	35	1	0.02	235.49	37.26	0.17	0.61	0.02	0.000460903	-4.92684	down
c88026.graph_c0	0	0	32	1346	209	1788	0	0	6.19	247.37	37.35	379.1	0.000304453	5.00689	up
c88031.graph_c0	156	341	227	1230	2718	792	6.92	16.48	9.61	48.52	103.88	36.92	2.96801e-09	2.90468	up
c88049.graph_c0	0	0	0	38	70	78	0	0	0	6.51	11.65	15.45	1.85126e-09	6.83012	up
c88058.graph_c0	321	249	529	2524	1722	848	11.16	9.41	17.51	77.79	51.38	30.92	0.000878361	2.38453	up
c88065.graph_c0	6	6	2	3714	12510	1516	0.31	0.34	0.1	172.31	562.17	83.01	5.3533e-32	9.22436	up
c88093.graph_c0	2	2	5	89	204	25	0.1	0.11	0.23	3.92	8.62	1.29	3.81061e-08	4.76547	up
c88096.graph_c0	6	860	643	6	37	13	0.11	17.59	11.5	0.1	0.6	0.26	0.00483114	-3.42853	down
c88133.graph_c0	3	15	4	26	65	19	0.36	1.94	0.45	2.91	7.26	2.37	0.00381471	2.46408	up
c88159.graph_c0	34	122	217	24	17	12	0.86	3.35	5.21	0.54	0.37	0.32	0.0093146	-2.08731	down
c88160.graph_c0	104	158	210	435	1347	207	4.66	7.7	8.97	17.32	51.95	9.74	0.00244334	2.13421	up
c88171.graph_c0	65	82	131	718	2039	355	2.93	4.02	5.67	29.63	79.43	17.05	5.06247e-08	3.47567	up
c88186.graph_c0	13	51	33	120	430	61	1.11	4.77	2.71	9.29	32.01	5.5	0.000416202	2.71955	up
c88194.graph_c0	58	39	38	219	360	122	7.32	5.37	4.6	24.96	39.81	16.28	0.00120088	2.34275	up
c88222.graph_c0	240	1219	1272	80	101	123	9.38	55.58	52.22	2.88	3.86	5.41	0.00150977	-2.34754	down
c88269.graph_c0	1	1	0	1260	4477	628	0.09	0.1	0	104.23	359.04	60.94	9.67268e-29	9.75823	up
c88271.graph_c0	281	675	679	1776	3520	845	9.12	23.87	21	51.16	98.13	28.8	7.45329e-05	2.1508	up
c88287.graph_c0	24	45	10	191	925	37	1.54	2.52	0.69	9.6	69.21	2.11	0.00155912	3.33446	up
c88296.graph_c0	12	43	39	187	377	79	0.73	2.86	2.28	10.19	19.91	5.08	3.34702e-06	2.96312	up
c88298.graph_c0	31	3512	4560	54	152	36	0.57	70.41	79.97	0.88	2.4	0.7	0.00129078	-3.75864	down
c88305.graph_c0	73	5916	10743	108	247	28	4.47	394.48	627.82	5.89	13.06	1.8	0.000551075	-4.0728	down
c88331.graph_c0	1	8	20	83	157	25	0.15	1.29	2.82	11.09	20.43	3.88	0.000620754	3.21146	up
c88338.graph_c0	1	15	4	110	323	18	0.08	1.33	0.31	7.98	22.71	1.53	7.246e-05	4.11718	up
c88340.graph_c0	171	198	173	1208	2729	930	4.99	6.28	4.81	31.22	68.29	28.47	8.19289e-10	3.2404	up
c88387.graph_c0	4	26	25	762	1846	255	0.08	0.52	0.32	9.93	24.22	4.18	2.61041e-14	5.57371	up
c88394.graph_c0	20	238	254	16	13	9	1.29	16.81	15.71	0.92	0.73	0.61	0.00206238	-2.8098	down
c88432.graph_c0	85	77	74	405	670	213	5.62	5.55	4.68	23.91	38.33	14.81	6.25589e-05	2.49529	up
c88477.graph_c0	11	9	2	117	42	65	0.33	0.29	0.06	3.12	1.11	2.05	0.00124619	3.21392	up
c88527.graph_c0	36	63	59	1483	4889	650	1.55	2.95	2.42	56.61	180.74	29.33	2.55631e-16	5.29251	up
c88535.graph_c0	0	27	2	51	725	14	0	2.84	0.5	3.47	40.56	1.28	0.00822933	3.66739	up
c88539.graph_c0	0	9	11	2123	6624	789	0	0.43	0.46	83.21	251.47	36.55	9.187e-22	8.14426	up
c88561.graph_c0	19	4942	6723	27	41	3	1.12	316.43	377.21	1.41	2.08	0.19	1.6583e-05	-5.26955	down
c88567.graph_c0	13	870	1594	5	6	26	0.42	30.2	48.27	0.14	0.16	0.89	0.00124362	-4.02156	down
c88570.graph_c0	0	9	7	5486	16309	2070	0	0.48	0.33	239.74	690.33	106.83	6.26602e-33	9.66524	up
c88607.graph_c0	7	15	4	30	212	23	0.07	0.16	0.04	0.27	1.84	0.24	0.00220453	3.02742	up
c88668.graph_c0	62	113	59	13	21	5	1.85	3.68	1.68	0.34	0.54	0.16	0.0022056	-2.19162	down
c88812.graph_c0	0	0	2	1136	2191	242	0	0	0.43	229.67	429.77	56.39	5.63362e-22	9.00704	up
c88821.graph_c0	24	87	42	2	3	7	0.6	2.36	1	0.04	0.06	0.18	0.00261883	-2.76017	down
c88993.graph_c1	23	273	73	10	19	5	0.89	4.97	1.11	0.27	0.25	0.14	0.00519978	-2.6491	down
c89041.graph_c0	45	1635	1749	79	105	56	2.06	81.58	76.32	3.18	4.09	2.7	0.00788344	-2.79473	down
c89042.graph_c0	6	1606	2080	17	24	6	0.47	137.03	154.74	1.89	1.62	0.49	0.000183099	-4.53252	down
c89044.graph_c0	32	66	47	135	336	80	1.33	2.99	1.86	5.01	12.12	3.52	0.000551075	2.09049	up
c89063.graph_c0	46	239	198	9	28	23	2.14	12.81	9.1	0.97	2.25	1.13	0.00421138	-2.26748	down
c89064.graph_c0	59	184	144	26	36	28	1.44	5.4	3.94	0.5	0.75	0.64	0.00878117	-1.54346	down
c89116.graph_c0	2	19	23	104	280	50	0.05	0.53	0.58	2.37	6.12	1.36	4.80993e-05	3.37354	up
c89137.graph_c0	35	106	46	182	712	95	2.53	8.34	3.17	11.74	44.49	7.21	0.00266564	2.4158	up
c89143.graph_c0	17	35	42	121	332	60	1.98	4.47	4.69	12.78	33.76	7.39	0.00013217	2.55955	up
c89152.graph_c0	136	266	290	548	1175	225	5.12	10.91	10.41	18.32	38.05	8.9	0.00809384	1.67963	up
c89186.graph_c0	389	393	574	139	120	73	13.1	14.42	18.41	4.15	3.47	2.58	0.00840011	-1.62558	down
c89202.graph_c0	41	133	611	3	4	16	2.11	7.44	29.95	0.14	0.18	0.86	0.00156213	-3.55724	down
c89241.graph_c0	148	1360	2536	103	107	60	3.05	30.5	49.77	1.88	1.88	1.3	0.00076569	-2.98581	down
c89257.graph_c0	17	75	53	129	401	53	2.29	11.02	6.85	15.7	47.37	7.52	0.00807904	2.13837	up
c89259.graph_c0	0	1	71	2123	908	3003	0	0.16	10.13	285.93	118.65	470.22	0.000123442	5.1079	up
c89260.graph_c0	1750	9706	12438	761	564	1095	51.75	313.53	351.74	20.01	14.32	34.07	0.00614836	-2.34596	down
c89272.graph_c0	26	55	21	210	625	90	0.57	1.32	0.44	4.09	11.79	2.08	5.67343e-05	3.09965	up
c89274.graph_c0	297	119	225	2349	2432	2839	7.13	3.06	5.12	49.93	49.88	71.6	8.80978e-06	3.52351	up
c89279.graph_c0	87	356	369	845	1953	516	3.24	14.41	13.11	27.92	62.42	20.15	0.000240288	2.31347	up
c89300.graph_c0	19	39	38	3	10	2	0.51	1.14	0.97	0.07	0.23	0.06	0.00708865	-2.20112	down
c89316.graph_c0	382	553	570	1385	2796	661	15.09	23.77	21.46	48.56	94.94	27.44	0.00133105	1.83885	up
c89365.graph_c0	1721	837	247	28	130	74	93.11	49.2	12.54	1.13	5.94	4.08	0.002648	-3.14956	down
c89368.graph_c0	0	1	0	34	61	28	0	0.04	0	1.24	2.15	1.21	2.27587e-08	5.79027	up
c89387.graph_c0	25	33	46	70	134	62	0.68	0.98	1.19	1.69	3.13	1.77	0.00325577	1.63244	up
c89400.graph_c0	33	105	95	11	15	15	0.4	1.4	1.1	0.12	0.16	0.19	0.00582133	-1.87309	down
c89453.graph_c0	202	277	507	63	94	40	7.19	10.7	17.13	1.98	2.88	1.49	0.000594852	-1.89649	down
c89466.graph_c0	470	8349	10596	247	386	173	13.47	260.24	289.07	6.27	9.49	5.2	7.76913e-05	-3.59042	down
c89512.graph_c1	284	4483	5690	237	492	104	3	76.26	78.32	2.82	5.46	1.12	0.00315991	-2.83506	down
c89563.graph_c0	25	3733	4363	12	86	9	1.87	291.3	298.99	0.77	5.33	0.77	0.000116607	-4.64907	down
c89570.graph_c0	46	374	438	868	2587	409	1.31	11.69	12.03	21.93	63.18	12.27	0.00860719	2.33914	up
c89575.graph_c0	0	8	0	77	678	36	0	0.44	0	3.44	30.49	1.89	2.52512e-05	5.20795	up
c89588.graph_c0	71	163	293	12	17	10	3.05	7.56	11.93	0.45	0.62	0.45	9.68252e-07	-3.11139	down
c89621.graph_c0	14	3450	3368	37	174	17	0.64	172.34	147.37	1.51	6.91	0.82	0.00507247	-3.56665	down
c89625.graph_c0	101	121	141	339	581	209	3.27	4.27	4.35	9.74	16.17	7.14	0.000379432	1.8395	up
c89649.graph_c0	218	140	115	747	2068	411	8.78	6.1	4.42	26.8	71.91	17.38	0.00207114	2.5328	up
c89658.graph_c0	0	1	1	121	275	25	0	0.2	0.18	21.05	47.04	5.02	2.15709e-10	6.4458	up
c89659.graph_c0	19	5	4	671	10	52	1.16	0.32	0.23	36.35	0.53	3.33	0.0073558	3.61445	up
c89663.graph_c0	238	295	211	37	81	37	6.3	8.49	5.31	0.87	1.84	1.03	0.00156735	-1.94135	down
c89674.graph_c0	5	18	14	151	397	96	0.16	0.62	0.42	4.26	10.84	3.21	1.10931e-11	4.20704	up
c89715.graph_c0	34	3279	4247	5	1	2	3.53	371.16	422.15	0.47	0.09	0.22	3.50277e-10	-7.00855	down
c89771.graph_c0	2	5	4	70	553	67	0.07	0.2	0.14	2.28	17.54	2.53	1.15901e-09	5.39473	up
c89859.graph_c0	106	202	139	354	635	200	5.38	11.17	6.73	15.99	27.78	10.67	0.00176339	1.64769	up
c89869.graph_c0	3	10	17	1084	3563	436	0.13	0.47	0.71	41.98	133.62	19.96	3.43216e-21	7.00916	up
c89882.graph_c1	42	59	43	3	12	7	1.14	1.74	1.11	0.07	0.28	0.2	0.00418172	-2.2523	down
c89885.graph_c0	18	35	15	179	579	92	1.46	2.39	0.79	8.8	28.43	5.39	1.54249e-06	3.53476	up
c89931.graph_c0	27	62	42	10	5	4	1.6	4.01	2.38	0.53	0.26	0.25	0.00588992	-2.17276	down
c89962.graph_c0	24	3177	4282	13	5	2	3.15	451.68	530.26	1.6	0.58	0.28	1.06215e-07	-6.12153	down
c89986.graph_c0	125	704	640	66	118	74	9.38	58.26	45.72	4.41	7.65	5.87	0.00747882	-1.85286	down
c90017.graph_c0	29	85	67	149	339	72	0.85	2.75	1.89	3.94	8.69	2.25	0.00380313	1.85412	up
c90019.graph_c1	46	44	28	868	533	200	1.37	1.45	0.8	23.23	13.87	6.33	2.14097e-06	3.67719	up
c90039.graph_c0	44	128	148	308	482	119	1.48	4.62	4.68	9.07	14.32	4.15	0.00428827	1.80155	up
c90047.graph_c0	5	48	27	109	217	32	0.36	3.8	1.87	7.07	13.63	2.44	0.00871079	2.34026	up
c90058.graph_c0	105	217	206	316	384	205	5.87	13.21	10.99	15.73	18.52	12.04	0.00913564	1.16433	up
c90064.graph_c0	15	70	31	144	464	70	1.41	7.16	2.78	12.12	37.86	6.91	0.000837061	2.63437	up
c90069.graph_c0	20	64	52	5	8	2	1.72	4.03	2.7	0.3	0.34	0.14	0.00067918	-2.58888	down
c90102.graph_c0	48	142	64	1622	4773	615	0.98	3.17	1.22	29.95	85.47	13.43	1.99422e-11	4.66519	up
c90104.graph_c0	4	5	3	38	183	26	0.27	0.37	0.2	2.33	10.88	1.88	5.46484e-06	3.99657	up
c90111.graph_c0	59	3383	4004	114	217	56	9.35	609.17	621.79	15.58	31.09	8.41	0.00428827	-3.17816	down
c90115.graph_c0	1	4	4	3422	12401	1522	0.03	0.14	0.12	94.26	330.69	49.64	1.58406e-38	9.96683	up
c90126.graph_c0	332	1152	499	31	64	62	26.12	100.01	38.97	2.33	4.57	5.32	1.34441e-05	-2.9498	down
c90142.graph_c0	11	29	9	424	1072	143	0.44	1.27	0.34	15.15	37.07	6.04	1.08384e-10	4.84426	up
c90184.graph_c0	1	1	0	502	1413	204	0.12	0.13	0	48.12	135.35	23.62	2.79864e-21	8.47696	up
c90205.graph_c0	0	1	1	290	1193	59	0	0.07	0.06	16.37	65.01	3.82	7.38774e-14	7.67505	up
c90212.graph_c0	155	141	214	663	1882	369	7.43	7.38	9.79	28.31	77.8	18.63	0.000258859	2.49455	up
c90231.graph_c0	150	1219	697	23	32	55	7.3	64.62	32.34	1	1.34	2.81	0.000200298	-3.17784	down
c90231.graph_c1	85	796	418	12	15	16	6.68	69.82	32.37	0.87	1.07	1.28	6.02898e-07	-3.90809	down
c90239.graph_c0	0	0	1	152	600	75	0	0	0.36	53.62	205.67	29.59	3.35251e-14	7.63039	up
c90244.graph_c0	10	6	11	2216	6718	823	0.33	0.22	0.35	65.8	193.16	28.93	4.09619e-26	7.79001	up
c90315.graph_c0	79	685	856	36	71	11	2.1	19.82	21.68	0.85	1.62	0.31	0.000603232	-3.0356	down
c90354.graph_c0	4	3	2	1245	2480	626	0.17	0.14	0.08	46.42	89.66	27.59	5.44419e-35	8.38059	up
c90357.graph_c0	113	35	25	46651	24590	41736	5.53	1.86	1.17	2029.48	1036.14	2144.27	7.11292e-21	8.26063	up
c90378.graph_c0	10	1101	1705	21	48	6	0.85	101.81	138.39	1.6	3.53	0.54	0.00134262	-3.8574	down
c90403.graph_c0	16	47	26	69	121	53	1.06	3.38	1.64	4.64	7.14	3.72	0.00223376	1.77405	up
c90411.graph_c0	106	148	120	507	690	220	4.14	6.3	4.47	17.6	23.19	9.03	0.00018049	2.09987	up
c90461.graph_c0	5	57	73	576	397	319	0.36	4.41	4.96	36.56	24.42	23.83	1.65747e-05	3.58267	up
c90502.graph_c0	136	664	701	4740	18450	1517	6.85	36.24	33.35	213.27	804.2	80.6	3.12093e-06	3.91954	up
c90504.graph_c0	95	335	294	551	1601	272	2.32	8.89	6.83	11.91	33.47	6.99	0.00654279	1.93656	up
c90530.graph_c0	23	20	10	103	312	41	2.7	2.56	1.13	10.89	32	5.07	0.00161427	2.8041	up
c90545.graph_c0	49	2166	1926	8	6	5	3.57	172.18	134.26	0.52	0.38	0.38	1.57145e-09	-5.98143	down
c90554.graph_c0	1	17	10	755	1019	65	0.04	0.8	0.41	28.89	37.79	2.94	5.07856e-09	5.57957	up
c90558.graph_c0	70	66	96	376	1052	129	4.1	4.21	5.37	19.63	53.22	7.94	0.000653359	2.63684	up
c90562.graph_c0	0	2	0	98	159	29	0	0.12	0	4.59	7.05	1.57	4.1877e-10	6.16866	up
c90569.graph_c0	171	184	142	499	864	326	14.7	17.25	11.68	38.45	64.53	29.49	0.00194632	1.88325	up
c90569.graph_c1	369	452	342	1157	2356	684	15.83	21.11	13.99	44.34	86.99	30.81	0.0012122	1.94961	up
c90631.graph_c0	36	100	106	404	922	218	0.89	2.68	2.48	8.8	19.45	5.63	3.31311e-07	2.88279	up
c90632.graph_c0	73	103	112	504	1086	178	6.92	11.13	9.95	39.24	92.6	16.88	4.8239e-05	2.66047	up
c90645.graph_c0	16	57	54	182	429	34	0.7	2.7	2.24	7.04	16.08	1.55	0.00666307	2.3926	up
c90660.graph_c2	62	160	159	241	561	143	7.54	21.26	18.57	26.47	59.77	18.34	0.00701197	1.57592	up
c90687.graph_c0	1	42	16	150	429	46	0.03	1.41	0.47	4.12	11.37	1.49	0.00168245	3.29974	up
c90691.graph_c1	52	267	251	8	17	11	1.6	8.95	7.37	0.22	0.45	0.35	3.34957e-06	-3.23556	down
c90698.graph_c0	14	33	29	51	189	37	0.36	0.93	0.71	1.16	4.18	1	0.00652104	1.98922	up
c90708.graph_c0	117	62	73	249	456	541	7.07	4.13	4.21	13.41	23.82	34.34	0.0067231	2.3568	up
c90708.graph_c1	200	185	137	398	718	690	10.5	10.64	6.91	18.61	32.54	38.08	0.00915688	1.96833	up
c90709.graph_c0	11	1103	1649	10	38	8	0.34	37.23	48.72	0.27	1.01	0.26	0.000328243	-4.19821	down
c90727.graph_c0	39	49	53	131	168	93	3.58	4.95	4.66	10.8	13.49	9.02	0.000690243	1.76079	up
c90738.graph_c0	13	26	23	21	263	80	1.02	2.24	1.82	1.55	17.54	6.46	0.00624114	2.52554	up
c90782.graph_c0	10	22	10	45	251	35	0.38	0.96	0.37	1.54	8.29	1.44	0.00100253	2.84241	up
c90788.graph_c2	5	29	27	369	1501	170	0.14	0.87	0.71	8.97	35.32	4.89	6.57994e-10	4.87897	up
c90801.graph_c0	119	222	178	417	732	367	4.85	9.86	6.94	15.13	25.71	15.73	1.00563e-05	1.86405	up
c90821.graph_c0	110	256	266	473	987	233	7.34	18.61	16.95	28.17	56.96	16.34	0.00384296	1.66943	up
c90826.graph_c0	92	550	817	69	100	41	5.03	28.84	36.68	2.63	3.79	2.05	0.00704011	-2.11815	down
c90843.graph_c1	7	9	16	65	323	39	0.25	0.36	0.55	2.09	10.07	1.49	2.54731e-05	3.53077	up
c90843.graph_c2	23	23	23	131	765	114	0.64	0.6	0.63	2.66	14.08	3.06	7.52511e-06	3.5885	up
c90871.graph_c0	68	186	146	540	913	271	3.23	9.61	6.61	22.79	37.33	13.51	1.72108e-06	2.38838	up
c90912.graph_c0	78	165	204	427	1000	163	2.04	4.69	5.08	9.88	22.41	4.96	0.00355924	1.98741	up
c90915.graph_c0	103	142	160	385	907	142	5.48	7.25	7.27	19.98	42.23	8.72	0.00713612	1.89082	up
c90935.graph_c0	5	14	15	17715	54960	6783	0.24	0.73	0.69	755.03	2268.77	341.47	2.48638e-55	10.5613	up
c90967.graph_c0	142	1862	2272	81	99	44	7.23	101.6	110.2	2.49	4.06	1.73	0.000127542	-3.32925	down
c91001.graph_c1	2	43	61	295	622	127	0.08	1.83	2.27	10.25	20.92	5.22	0.000432673	3.35411	up
c91006.graph_c0	10	57	15	119	490	43	0.52	2.7	0.62	3.82	17.12	1.64	0.00245345	2.89102	up
c91028.graph_c0	7	71	18	106	293	74	0.31	3.46	0.77	4.22	11.29	3.48	0.00502746	2.48879	up
c91033.graph_c0	267	4866	4082	176	267	133	16.65	296.94	222.25	9.72	14.45	8.7	0.000561955	-3.07493	down
c91036.graph_c0	53	119	103	254	585	129	5.06	12.39	9.41	21.76	48.58	12.96	0.000638738	2.01089	up
c91061.graph_c0	28	2094	2680	12	7	6	0.63	51	56.83	0.24	0.15	0.14	1.62203e-07	-5.64114	down
c91093.graph_c0	30	1399	909	35	17	29	1.34	68.17	38.79	1.39	0.65	1.36	0.00143241	-3.45506	down
c91094.graph_c0	0	7	13	25	81	34	0	0.43	0.7	1.25	3.93	2.01	0.00224508	2.94653	up
c91108.graph_c0	5	4	2	34	130	19	0.18	0.16	0.07	1.09	4.03	0.72	8.01463e-05	3.6414	up
c91112.graph_c0	41	99	76	170	408	139	1.36	3.59	2.4	5	11.62	4.84	0.000108833	1.99907	up
c91129.graph_c0	4	42	21	106	266	31	0.43	5.13	2.54	8.64	21.02	2.96	0.0039024	2.66793	up
c91132.graph_c1	35	80	89	17	16	11	2.51	6.24	6.09	1.09	0.99	0.83	0.00760706	-1.67645	down
c91135.graph_c0	123	68	67	352	729	213	14.01	8.51	7.42	36.11	72.57	25.63	0.00685805	2.18559	up
c91136.graph_c0	0	7	17	429	679	191	0	0.22	0.46	10.34	16	5.46	2.93842e-11	5.59508	up
c91139.graph_c0	0	5	4	209	772	64	0	0.12	0.09	4.19	14.97	1.52	2.44403e-11	6.17835	up
c91151.graph_c0	47	51	51	1069	2411	422	3.2	3.78	3.32	75.25	141.99	34.82	2.61521e-13	4.57127	up
c91163.graph_c0	105	135	97	199	423	244	3.08	5.2	2.78	5.61	11.24	7.09	0.00983919	1.5856	up
c91169.graph_c0	28	102	65	296	760	106	0.44	1.73	0.96	4.08	10.16	1.73	0.000245855	2.68015	up
c91175.graph_c1	1	32	20	214	553	43	0.08	2.35	1.35	11.94	30.88	2.84	0.000275144	3.74131	up
c91182.graph_c0	18	22	21	39	130	38	0.85	1.21	0.98	1.68	5.54	1.88	0.00862732	1.85985	up
c91196.graph_c0	0	1	2	1388	4267	590	0	0.08	0.15	68.14	209.83	36.62	2.16358e-29	9.61833	up
c91207.graph_c0	10	33	18	230	544	77	0.36	1.28	0.61	7.26	16.62	2.88	1.02082e-07	3.79621	up
c91234.graph_c0	69	105	56	180	901	113	1.33	2.01	0.76	2.27	14.85	1.69	0.00924618	2.23617	up
c91238.graph_c0	215	1248	1454	188	183	106	5.44	34.36	35.67	4.31	3.97	2.85	0.00956768	-1.91676	down
c91251.graph_c0	77	165	176	1627	6034	710	2.81	7.26	6.85	53.33	190.77	27.58	1.04612e-09	4.21815	up
c91263.graph_c0	0	7	4	3826	12099	1576	0	0.41	0.2	182.24	558.2	88.59	1.05963e-33	9.72151	up
c91371.graph_c0	77	1279	398	30	66	52	5.04	91.39	25.25	1.78	3.79	3.52	0.00607994	-2.61162	down
c91393.graph_c0	50	247	316	10	21	7	3.34	15.4	17.19	0.51	1.12	0.45	5.26878e-06	-3.30723	down
c91394.graph_c0	129	261	213	360	704	262	8.57	18.9	13.53	21.36	40.53	18.31	0.00198167	1.43007	up
c91402.graph_c0	3	1	8	64	484	56	0.22	0.08	0.49	3.81	29.04	4.16	4.44519e-07	4.93698	up
c91427.graph_c0	40	2121	2314	78	127	41	1.09	62.76	59.95	1.88	2.96	1.17	0.00466787	-3.10066	down
c91432.graph_c0	68	222	103	390	1070	145	3.37	11.45	4.33	17.75	49.03	6.97	0.00623665	2.12735	up
c91452.graph_c0	51	114	132	439	1002	231	2.39	5.85	5.9	18.29	40.43	11.37	1.46997e-06	2.6865	up
c91465.graph_c0	87	239	265	33	67	33	2.75	8.23	7.99	0.93	1.82	1.1	0.00239675	-1.66004	down
c91474.graph_c0	102	216	158	2296	7261	802	6.34	14.63	9.44	127.31	390.11	52.46	5.31842e-10	4.3061	up
c91500.graph_c0	1	1	0	140	199	50	0.08	0.08	0	6.26	8.2	2.44	3.24905e-13	6.63182	up
c91524.graph_c0	114	232	232	356	687	196	8.74	19.39	16.99	24.38	45.61	15.8	0.00923832	1.37039	up
c91536.graph_c0	86	156	101	23	33	23	4.19	8.28	4.69	1	1.39	1.18	0.00448798	-1.67182	down
c91611.graph_c0	24	203	172	11	29	12	1.8	16.63	12.42	0.74	1.9	0.95	0.00739955	-2.24218	down
c91654.graph_c0	109	775	1042	67	154	46	2.18	16.85	20.04	1.18	2.64	0.96	0.0072968	-2.2047	down
c91672.graph_c0	1292	2148	1770	2877	5521	2298	34.21	61.88	44.62	67.48	125.34	63.85	0.00457542	1.31089	up
c91688.graph_c0	0	1	3	939	2860	348	0	0.11	0.37	101.71	302.01	46.99	2.07562e-24	8.81937	up
c91699.graph_c0	367	1058	1165	102	136	144	17.92	45.99	45.92	4.79	5.05	7.22	0.000540602	-2.09584	down
c91717.graph_c0	43	81	46	172	291	98	1.85	3.8	1.89	6.58	10.78	4.43	0.000648182	1.93855	up
c91739.graph_c0	120	1392	1314	88	123	109	2.96	37.46	30.82	2.11	2.31	2.59	0.00999537	-2.26207	down
c91772.graph_c0	0	2	2	70	125	59	0	0.06	0.05	1.64	2.83	1.64	7.47902e-13	5.74118	up
c91788.graph_c1	22	42	33	70	310	43	3.46	7.23	5	10.11	43.05	7.14	0.008117	2.11985	up
c91792.graph_c0	2303	3678	3598	671	773	671	55.97	97.15	83.16	14.59	16.12	17.11	0.000646031	-1.69691	down
c91797.graph_c0	4	3889	5545	31	178	11	0.2	166.85	208.2	1.08	5.92	0.45	0.00648583	-3.74066	down
c91804.graph_c0	609	8633	10993	585	1072	431	10.7	157.45	166.22	8.56	15.37	7.75	0.00756329	-2.4629	down
c91812.graph_c0	3	14	12	329	941	96	0.14	0.72	0.54	13.83	38.32	4.77	9.86093e-12	5.31241	up
c91815.graph_c0	19	11	14	419	1437	202	0.24	0.15	0.17	4.73	15.69	2.71	6.42708e-11	5.05303	up
c91824.graph_c0	47	86	61	203	340	68	1.14	2.26	1.4	4.37	7.05	1.73	0.00686456	1.80825	up
c91829.graph_c0	2	11	8	10499	31438	3488	0.07	0.43	0.27	335.92	974.04	132.08	5.23248e-45	10.3125	up
c91845.graph_c0	0	9	11	79	121	24	0	0.36	0.39	2.59	3.85	0.93	0.000146247	3.52218	up
c91864.graph_c0	2	1295	1066	3	38	1	0.15	107.88	77.87	0.2	2.52	0.08	0.0039024	-3.98244	down
c91873.graph_c2	5	12	9	43	70	21	0.2	0.52	0.44	1.62	2.79	0.88	0.000164725	2.55832	up
c91876.graph_c0	14	37	28	220	710	83	0.73	2.11	1.4	10.24	32.04	4.56	9.06636e-07	3.618	up
c91892.graph_c0	54	6128	8177	12	7	3	0.7	129.81	151.65	0.16	0.1	0.06	2.49969e-10	-6.89393	down
c91917.graph_c0	2	28	37	124	158	64	0.04	0.67	0.78	2.43	3	1.49	0.00174791	2.67528	up
c91958.graph_c0	1	44	19	391	1468	154	0.03	1.56	0.59	11.3	41.08	5.27	3.4701e-06	4.62736	up
c91997.graph_c0	14	1376	1226	14	49	6	0.87	93.41	72.99	0.78	2.64	0.39	0.000689541	-3.95111	down
c92020.graph_c0	68	65	23	1	4	1	2.33	2.43	0.72	0.03	0.12	0.04	9.61176e-05	-3.97504	down
c92027.graph_c0	19	38	29	139	304	49	1.53	3.34	2.23	10.09	21.24	4.15	0.000170883	2.59028	up
c92028.graph_c0	89	62	23	5	13	4	3.83	2.91	0.94	0.19	0.48	0.18	0.008117	-2.64039	down
c92031.graph_c0	29	50	45	159	224	91	0.91	1.74	1.35	4.45	6.08	3.01	4.0291e-06	2.21105	up
c92089.graph_c0	570	1171	1070	4401	6919	2425	24.92	56.21	44.47	182.21	275.36	112.66	2.48204e-10	2.57391	up
c92090.graph_c0	19	2131	1608	16	0	2	1.38	168.29	111.35	1.04	0	0.15	0.000204815	-4.92071	down
c92095.graph_c0	107	55	20	7	2	2	3.19	1.88	0.55	0.18	0.06	0.06	0.00304168	-3.31904	down
c92101.graph_c0	41	139	89	310	1366	183	2.2	8.19	4.57	14.84	63.66	10.35	0.000253523	2.80918	up
c92106.graph_c0	2	35	45	83	368	72	0.1	1.98	2.19	3.76	16.18	3.9	0.00559467	2.73865	up
c92121.graph_c1	28	306	137	14	17	8	1.23	14.59	5.72	0.54	0.64	0.37	0.0011532	-2.76824	down
c92126.graph_c0	86	147	84	495	959	229	5.28	9.83	4.96	27.1	50.89	14.78	4.08783e-05	2.50873	up
c92139.graph_c0	135	515	657	68	35	49	8.55	35.53	39.74	3.84	1.92	3.26	0.00245345	-2.2948	down
c92139.graph_c1	256	1135	1357	99	111	50	16.72	81.09	86.23	5.78	6.35	3.5	1.48274e-05	-2.74487	down
c92141.graph_c0	36	83	152	4	15	4	1.55	3.09	6.37	0.12	0.44	0.14	0.000129681	-2.96352	down
c92152.graph_c0	1	6	11	1116	3023	483	0.03	0.18	0.29	25.95	68.52	13.42	1.17653e-24	7.59204	up
c92155.graph_c0	86	728	978	15	63	35	4.87	44.91	52.88	0.76	3.08	2.08	0.00044767	-3.10754	down
c92174.graph_c0	19	314	510	25	36	10	1.17	21.17	30.08	1.38	1.92	0.65	0.00886724	-2.67383	down
c92184.graph_c0	307	908	594	78	132	89	5.81	18.67	10.7	1.32	2.13	1.76	4.80993e-05	-2.06327	down
c92193.graph_c0	40	93	85	202	267	116	1.04	2.62	2.09	4.63	5.92	3.15	0.000134877	1.77667	up
c92208.graph_c0	258	857	314	48	131	58	19.16	64.68	21.22	3.05	7.79	4.29	0.00184845	-2.09839	down
c92210.graph_c0	987	2007	1334	3548	8680	2324	41.34	91.42	53.2	132.01	312.71	102.18	0.000465153	1.93605	up
c92247.graph_c0	68	240	192	484	820	217	4.55	17.3	12.06	28.89	47.33	15.23	0.00125867	1.91132	up
c92247.graph_c1	86	149	193	514	981	270	7.14	13.48	15.32	38.2	70.73	23.66	1.16388e-05	2.26915	up
c92250.graph_c0	77	36	20	0	0	1	5.16	2.56	1.29	0	0	0.07	4.6458e-05	-4.97805	down
c92254.graph_c0	3	9	0	33	134	24	0.14	0.44	0	1.33	5.23	1.14	0.000731609	3.57955	up
c92262.graph_c0	198	430	413	853	1849	626	5.63	13.3	11.2	21.48	45.09	18.68	1.53132e-05	1.96054	up
c92272.graph_c0	2	4	10	71	124	39	0.26	0.56	1.23	8.26	13.94	5.27	3.31139e-08	3.94376	up
c92293.graph_c1	49	1554	2094	34	51	46	6.11	190.65	225.11	3.52	5.15	5.57	0.000572615	-3.56176	down
c92301.graph_c1	28	99	119	10	4	2	3.22	12.43	13.13	1.04	0.4	0.24	0.000262923	-3.10631	down
c92308.graph_c0	12	30	7	138	618	49	0.31	0.86	0.17	3.21	13.9	1.35	8.67679e-05	3.677	up
c92367.graph_c0	58	112	79	216	549	100	2.54	5.33	3.3	8.4	20.65	4.59	0.00444228	1.90836	up
c92367.graph_c1	207	291	307	683	1629	326	2.63	4.02	3.71	7.66	17.7	4.34	0.00396875	1.82006	up
c92383.graph_c0	0	4	0	984	2699	351	0	0.21	0	40.59	105.86	16.97	2.92963e-21	8.64666	up
c92390.graph_c0	230	427	455	651	1214	429	9.01	18.42	17.23	23.14	41.77	17.81	0.00335825	1.3412	up
c92397.graph_c0	0	0	0	287	1057	126	0	0	0	9.24	33.07	4.82	3.1374e-17	8.75858	up
c92403.graph_c0	0	1	1	242	1853	189	0	0.07	0.06	12.04	91.1	11.07	2.45276e-17	8.27814	up
c92432.graph_c0	83	70	66	3	6	14	4.12	3.5	2.76	0.12	0.22	0.7	0.00912774	-2.53393	down
c92469.graph_c0	3	15	7	144	160	32	0.05	0.29	0.12	2.24	2.44	0.6	1.43195e-06	3.8051	up
c92470.graph_c0	76	56	56	436	1261	163	1.59	1.27	1.11	8.09	22.72	3.62	0.000187728	3.03533	up
c92484.graph_c0	0	55	55	643	1745	545	0	2.24	1.96	21.32	56.04	21.38	4.57002e-05	4.43154	up
c92489.graph_c0	1	20	23	114	367	44	0.04	0.78	0.79	3.62	11.3	1.65	0.000268745	3.49794	up
c92550.graph_c0	280	664	764	1087	2222	621	7.36	19.18	19.29	25.34	49.73	17.03	0.00624519	1.49452	up
c92553.graph_c0	39	1093	1246	23	34	35	1.05	34.47	32.6	0.55	0.79	0.99	0.000669486	-3.45816	down
c92553.graph_c1	9	515	595	22	10	8	0.6	37.58	38.02	1.31	0.62	0.56	0.00280492	-3.41994	down
c92580.graph_c0	37	35	40	129	568	80	0.5	0.51	0.51	1.52	6.5	1.12	0.0010904	2.62675	up
c92597.graph_c0	161	391	377	40	101	72	8.11	20.89	17.1	1.68	4.2	3.57	0.00876517	-1.59847	down
c92637.graph_c0	3	27	31	557	1591	217	0.09	0.94	1.06	14.27	39.7	6.58	1.0918e-10	5.12997	up
c92667.graph_c0	47	86	51	1074	2788	319	1.7	3.35	1.66	31.56	78.94	11.15	9.75246e-10	4.33094	up
c92701.graph_c0	28	82	83	531	1573	158	0.65	2.07	1.84	10.91	31.31	3.85	3.43459e-06	3.51553	up
c92702.graph_c0	103	228	289	588	1719	252	2.45	5.9	6.57	12.4	35.08	6.3	0.00241748	2.16113	up
c92717.graph_c0	47	266	265	1017	2859	369	1.21	7.7	6.72	23.8	64.48	10.72	0.000216075	2.97259	up
c92730.graph_c0	58	171	174	772	2127	395	3.49	11.21	10	41.43	110.6	25	3.2675e-07	3.16722	up
c92765.graph_c0	410	793	493	3627	10431	1366	13.7	27.39	13.52	119.65	332.79	53.2	7.52511e-06	3.13898	up
c92781.graph_c0	42	71	93	265	612	125	1.18	2.13	2.44	6.48	14.49	3.62	7.15591e-05	2.42374	up
c92830.graph_c0	0	22	11	1364	6134	348	0	2.17	0.95	110.46	481.2	33.04	5.12122e-11	6.78196	up
c92872.graph_c0	7	4857	6107	46	90	16	0.13	101.54	111.7	0.78	1.48	0.32	0.000674041	-4.33852	down
c92887.graph_c0	33	69	60	154	374	83	1.51	3.43	2.53	6.17	14.9	3.98	0.000516434	2.08946	up
c92932.graph_c0	22	131	135	286	816	139	0.86	5.55	5.01	9.88	27.34	5.68	0.00421376	2.29988	up
c92944.graph_c0	329	4052	5611	245	320	204	15.46	203.85	247.09	10.25	12.83	10.09	0.00171007	-2.78758	down
c92945.graph_c0	0	5	14	262	658	167	0	0.42	0.83	11.43	27.85	8.55	2.61693e-11	5.61153	up
c92947.graph_c3	210	1658	941	122	164	134	9.45	64.38	31.22	4.78	5.63	5.05	0.00915781	-1.9847	down
c92957.graph_c0	2	11	5	50	401	109	0.09	0.52	0.21	1.92	14.89	4.94	3.22432e-08	4.73117	up
c92977.graph_c1	260	435	365	88	142	81	9.46	17.42	12.84	2.88	4.52	3.1	0.00361816	-1.37709	down
c92992.graph_c0	27	52	55	123	203	55	1.05	1.91	2.07	4.24	6.79	2.11	0.00233402	1.75549	up
c93001.graph_c0	1	1	3	2443	7849	947	0.02	0.03	0.07	53.25	165.62	24.47	2.08394e-33	9.86214	up
c93004.graph_c0	193	239	213	613	818	299	6.06	8.17	6.4	17.07	22.06	9.86	0.00426857	1.61921	up
c93013.graph_c0	13	1128	1588	32	25	13	0.34	31.9	39.3	0.74	0.56	0.35	0.000867247	-3.82735	down
c93031.graph_c0	0	7	6	706	2960	332	0	0.73	0.55	60.49	245.91	33.43	2.00086e-18	7.52939	up
c93038.graph_c0	156	94	21	2	2	0	1.93	4.64	2.29	0.02	0.33	0	1.54247e-05	-4.90884	down
c93048.graph_c0	15	15	11	90	250	37	0.67	0.73	0.47	3.56	9.62	1.73	0.000135254	3.02654	up
c93057.graph_c0	437	384	409	1287	2983	628	6.71	6.41	5.98	17.47	39.21	10.12	0.00549861	1.97256	up
c93058.graph_c0	308	3485	4818	140	170	93	12.88	158.62	192.07	5.22	6.11	4.13	3.9092e-05	-3.47213	down
c93076.graph_c0	30	193	229	571	1475	237	1.51	10.56	10.98	25.57	63.89	12.51	0.00245364	2.50998	up
c93076.graph_c1	49	156	219	588	1469	228	1.58	5.48	6.73	16.82	40.69	7.72	0.000424438	2.57977	up
c93079.graph_c0	3	19	6	3137	9260	861	0.14	0.94	0.26	126.69	359.74	41.31	7.78788e-25	8.2024	up
c93084.graph_c0	3	88	78	9285	26169	3206	0.14	4.42	3.43	380.92	1039.85	155.43	1.4561e-15	7.1853	up
c93086.graph_c0	22	23	21	276	681	93	1.56	1.78	1.42	17.49	41.83	6.94	1.71047e-07	3.80036	up
c93086.graph_c1	32	47	22	274	700	89	2.02	3.23	1.32	15.44	38.13	5.9	3.95709e-05	3.2287	up
c93086.graph_c2	38	14	24	213	498	86	3.43	1.38	2.08	17.28	39.51	8.18	0.000523555	3.0374	up
c93094.graph_c0	5	23	12	30	99	28	0.28	1.39	0.64	1.48	4.75	1.63	0.00495094	2.17361	up
c93103.graph_c0	10	4261	4707	22	32	3	0.21	95.16	91.78	0.38	0.7	0.06	3.12826e-05	-5.16699	down
c93124.graph_c0	80	97	99	245	575	218	4.24	5.6	5.01	11.57	26.29	12.15	0.000118687	2.0798	up
c93143.graph_c1	26	166	167	7	15	18	0.94	6.31	5.55	0.23	0.45	0.66	0.00922385	-2.29273	down
c93151.graph_c0	3	9	18	55	62	19	0.07	0.23	1.61	2.71	1.26	0.96	0.00255769	2.42161	up
c93163.graph_c0	56	243	221	20	41	24	1.82	8.43	8.31	0.55	1.03	0.69	0.00204978	-2.00616	down
c93177.graph_c0	0	9	13	62	91	42	0	0.89	1.11	4.95	7.09	3.94	6.66002e-05	3.36336	up
c93178.graph_c0	25	339	370	22	23	19	0.86	12.67	12.14	0.67	0.68	0.69	0.00543091	-2.57645	down
c93210.graph_c0	357	466	540	824	1378	721	9.55	13.57	13.76	19.53	31.62	20.25	0.00312437	1.39229	up
c93217.graph_c0	104	3252	3082	82	60	48	3.75	150.21	119.58	3.86	2.53	2.23	0.000107307	-3.83314	down
c93221.graph_c0	27	20035	17455	15	1	0	1.06	856.46	653.3	0.52	0.03	0	1.05364e-05	-5.99999	down
c93248.graph_c0	50	92	52	477	1619	223	1.82	3.7	1.93	16.16	55.71	9.59	1.19769e-06	3.47198	up
c93253.graph_c0	2310	3716	3956	801	1301	642	43.14	71.63	69.47	13.08	19.72	13.58	0.000214578	-1.48561	down
c93255.graph_c0	0	6	15	69	210	28	0	0.28	0.61	2.6	7.67	1.25	0.000333484	3.68083	up
c93265.graph_c0	9	15	9	119	286	30	0.16	0.3	0.16	1.91	4.43	0.57	1.22916e-05	3.5438	up
c93302.graph_c0	10	24	17	388	1427	159	0.43	1.13	0.7	14.86	52.92	7.2	4.67696e-12	5.03554	up
c93324.graph_c0	27	239	238	10	33	10	2.62	22.54	25.6	1	2.44	1.21	0.00340684	-2.54377	down
c93326.graph_c2	67	135	189	267	465	156	9.8	21.6	26.61	35.45	59.92	24.09	0.00534654	1.4976	up
c93336.graph_c0	0	0	0	53	448	28	0	0	0	1.19	9.87	0.8	1.30119e-09	7.12383	up
c93338.graph_c1	91	321	444	31	60	23	2.1	8	9.67	0.63	1.18	0.55	0.000237924	-2.34107	down
c93338.graph_c2	568	1772	2119	141	325	151	17.06	59.96	60.55	3.92	8.28	4.65	2.12834e-05	-2.32096	down
c93383.graph_c4	960	1344	1158	2415	4376	1543	42.34	62.5	46.4	98.91	174.21	71.16	0.00422571	1.47587	up
c93400.graph_c1	194	185	248	414	994	363	5.51	5.72	6.71	10.41	24.21	10.82	0.00696698	1.63854	up
c93431.graph_c0	2	4	13	662	2183	197	0.04	0.09	0.27	12.76	40.68	4.5	1.81705e-15	6.7047	up
c93432.graph_c1	56	113	138	25	15	14	1.03	2.23	2.87	0.43	0.22	0.26	0.00400793	-1.91424	down
c93442.graph_c0	181	148	41	0	0	2	19.51	18.03	5.01	0	0	0.27	9.06636e-07	-5.55542	down
c93455.graph_c0	22	1502	2528	4	3	5	0.87	65.03	95.86	0.14	0.1	0.21	2.55733e-08	-6.10714	down
c93457.graph_c0	24	4561	5203	28	28	20	0.76	156.45	156.53	0.79	0.76	0.67	7.99737e-06	-5.09719	down
c93496.graph_c4	5	1347	1586	18	71	11	0.24	56.85	65.56	0.73	2.13	0.37	0.00570468	-3.51301	down
c93497.graph_c0	30	2024	2875	17	5	8	0.68	49.96	62.1	0.34	0.1	0.19	1.48657e-06	-5.34883	down
c93508.graph_c0	130	1250	1429	98	156	93	1.78	20.95	20.53	1.25	1.94	1.44	0.00762884	-2.23245	down
c93530.graph_c1	1	1	9	210	221	25	0.09	0.06	0.6	9.87	10.18	1.34	1.19286e-06	4.89608	up
c93536.graph_c0	266	15927	23849	458	1584	197	10.65	694.15	910.25	16.31	54.55	8.28	0.00846449	-3.11624	down
c93558.graph_c0	8	105	98	407	1623	230	0.21	2.93	2.39	9.27	35.73	6.22	0.000214467	3.40505	up
c93566.graph_c0	13	3	2	64	251	27	1.38	0.33	0.23	4.09	15.81	1.94	0.0025172	3.36121	up
c93569.graph_c1	148	246	117	28	34	30	3.78	6.85	2.84	0.63	0.74	0.8	0.00341743	-1.98809	down
c93637.graph_c0	75	803	441	25	47	25	1.83	21.35	10.26	0.54	0.98	0.64	0.000197024	-2.95368	down
c93638.graph_c0	1	65	114	564	1874	231	0.02	1.58	2.26	11.09	35.47	5.37	0.00152268	3.60081	up
c93656.graph_c0	40	11138	10437	10	4	3	1.22	370.66	304.02	0.27	0.1	0.1	1.42618e-10	-7.26774	down
c93663.graph_c0	8	7624	9634	28	23	2	0.11	118.36	130.82	0.35	0.28	0.03	1.49163e-05	-5.56655	down
c93664.graph_c0	0	5	4	87	176	21	0	0.34	0.25	2.86	5.75	0.73	3.87011e-07	4.6917	up
c93691.graph_c0	20	43	46	4	2	2	1.61	3.78	3.55	0.29	0.14	0.17	0.000296834	-3.02303	down
c93711.graph_c0	290	482	375	800	1453	521	6.14	10.77	6.85	14.73	26.14	11.31	0.00195218	1.51631	up
c93717.graph_c0	1	4	1	1366	4042	572	0.04	0.19	0.04	51.2	146.35	25.48	4.21267e-29	8.99325	up
c93724.graph_c0	34	38	60	95	204	60	2.03	2.47	3.41	5.05	10.5	3.76	0.00969051	1.6213	up
c93725.graph_c0	15	106	93	233	745	86	0.42	2.51	1.93	4.59	14.31	1.96	0.00645201	2.41926	up
c93747.graph_c0	10	69	79	254	773	110	0.49	2.84	3.49	8.76	25.31	4.72	0.000487199	2.93787	up
c93759.graph_c0	0	1	0	1777	6646	790	0	0.04	0	61.88	224.47	32.43	3.70721e-30	10.4965	up
c93790.graph_c0	7	87	113	311	741	91	0.32	4.38	4.98	12.78	29.5	4.42	0.00954617	2.56059	up
c93806.graph_c0	223	228	148	975	3046	463	9.79	10.45	6.21	43.8	159.27	27.61	0.000495703	2.72129	up
c93840.graph_c0	7	29	15	54	225	35	0.68	3.07	1.39	4.7	18.99	3.57	0.0011395	2.6613	up
c93843.graph_c1	62	135	164	380	691	136	2.53	6.01	6.39	13.8	24.3	5.84	0.00224508	1.9534	up
c93861.graph_c1	2	7	13	44	119	19	0.15	0.58	0.94	2.99	7.83	1.52	0.000311198	3.06688	up
c93902.graph_c0	48	146	85	17	18	13	1.13	3.74	1.91	0.35	0.36	0.32	0.00166105	-1.97393	down
c93911.graph_c0	19	75	87	171	517	80	0.79	3.38	3.43	6.28	18.4	3.48	0.00379164	2.24327	up
c93917.graph_c0	34	341	553	19	26	14	5.35	33.01	47.81	2.72	3.52	2.32	0.000619654	-3.05786	down
c93926.graph_c0	5	8	6	5839	23195	1716	0.34	0.59	0.39	353.01	1358.62	122.18	1.23179e-34	9.60821	up
c93964.graph_c0	101	24	26	3	4	3	1.8	0.46	0.44	0.05	0.06	0.06	0.00252455	-3.32976	down
c93994.graph_c0	267	453	536	1052	1984	704	12.98	23.98	24.85	45.49	83.1	35.94	3.17686e-05	1.84973	up
c93999.graph_c0	419	12086	11800	374	680	243	4.23	202.17	171.83	3.19	5.93	3.14	0.000985471	-3.23825	down
c94000.graph_c0	21	36	45	131	171	55	1.27	2.38	2.61	7.08	8.98	3.53	0.000310718	2.06835	up
c94004.graph_c0	21	51	60	95604	33246	35652	3.76	9.87	10.07	15584.4	5772.55	7633.01	6.18134e-55	10.1106	up
c94004.graph_c1	28	59	69	124976	50820	64908	1.09	2.49	2.55	4307.02	1696.08	2645.92	1.03748e-67	10.4976	up
c94029.graph_c0	115	459	556	70	41	33	15.09	65.52	69.48	8.35	4.92	4.52	0.00196465	-2.24267	down
c94032.graph_c0	25	49	229	6	6	7	0.54	1.15	5.35	0.13	0.11	0.16	0.00201602	-2.99765	down
c94040.graph_c0	8	8	15	229	1034	133	0.31	0.34	0.56	7.9	34.55	5.43	1.97906e-11	5.1293	up
c94043.graph_c0	18	2024	2848	35	131	20	0.25	31.09	38.19	0.45	1.61	0.3	0.00394489	-3.48798	down
c94050.graph_c2	0	6	4	85	121	23	0	0.15	0.09	1.7	2.32	0.54	5.23279e-07	4.41115	up
c94051.graph_c1	51	8132	9264	26	13	2	0.94	174.47	172.72	0.47	0.2	0.03	9.1426e-08	-6.2328	down
c94052.graph_c0	97	154	196	466	1129	180	5.63	9.75	10.87	24.12	56.64	10.99	0.00212127	2.08732	up
c94066.graph_c0	58	288	234	34	24	19	4.13	22.84	16.51	2.21	1.54	1.41	0.00197355	-2.19659	down
c94066.graph_c1	73	606	541	42	52	27	3.13	28.64	21.93	1.63	2.05	1.2	0.000732467	-2.57475	down
c94083.graph_c0	8	38	45	97	414	37	0.27	1.41	1.46	2.94	12.13	1.33	0.00510728	2.58183	up
c94085.graph_c0	12	27	19	75	159	32	0.44	0.88	0.5	2.33	4.79	1.19	0.000551075	2.33551	up
c94095.graph_c0	0	0	5	497	1805	230	0	0	0.49	51.68	190.82	29.08	1.72877e-15	7.68815	up
c94099.graph_c0	72	98	34	5	7	9	1.65	3.24	0.89	0.14	0.13	0.21	0.00272941	-2.66106	down
c94102.graph_c0	5	23	32	360	1521	235	0.15	0.77	0.94	9.88	40.45	7.65	2.97861e-11	5.00409	up
c94122.graph_c0	3	8	12	15752	50493	6453	0.11	0.33	0.43	524.89	1629.29	254.38	8.54142e-55	10.8818	up
c94138.graph_c0	259	216	209	899	1476	465	16.54	14.97	12.74	51.02	81.19	31.16	0.00172472	2.08597	up
c94146.graph_c0	5	18	11	165	507	104	0.1	0.41	0.22	3.07	9.09	2.29	1.12031e-11	4.50321	up
c94156.graph_c0	704	994	949	1758	4263	1038	19.43	29.86	24.94	42.97	100.89	30.06	0.00929826	1.55434	up
c94160.graph_c0	234	250	272	35	59	23	9.41	10.92	10.4	1.25	2.05	0.97	2.88365e-05	-2.36136	down
c94160.graph_c2	221	279	270	39	65	36	7.32	14.11	11.45	1.1	2.15	1.14	6.80001e-05	-2.08442	down
c94183.graph_c2	69	522	709	26	31	32	1.64	13.46	16.1	0.56	0.65	0.81	0.0003931	-2.93573	down
c94187.graph_c1	26	4548	5937	4	3	3	0.46	87.41	99.82	0.06	0.05	0.06	1.08468e-10	-7.17625	down
c94236.graph_c0	129	192	258	26	61	35	3.51	5.69	6.71	0.63	1.42	1	0.00124619	-1.81416	down
c94239.graph_c0	69	21	20	162	774	163	2.45	0.81	0.7	5.94	28.22	6.86	0.00705877	2.75363	up
c94259.graph_c0	26	97	143	459	1570	126	0.44	1.8	2.32	6.91	22.88	2.25	0.000740312	2.98157	up
c94298.graph_c0	18	1090	1240	7	4	18	0.64	41.5	39.68	0.2	0.13	0.77	0.000187573	-4.37639	down
c94300.graph_c0	12	26	20	132	555	56	0.26	0.61	0.41	2.52	10.25	1.27	1.08304e-05	3.51842	up
c94310.graph_c1	127	150	109	340	624	194	9.81	12.63	8.05	23.5	41.79	15.76	0.00710319	1.6981	up
c94319.graph_c0	167	1383	1215	119	167	110	4.03	36.68	27.89	2.54	3.46	2.79	0.00772244	-2.058	down
c94327.graph_c0	93	5015	6764	51	50	50	2.77	122.22	144.69	0.85	0.89	1.02	7.27066e-06	-4.70962	down
c94329.graph_c0	33	72	88	171	348	69	3.27	7.78	8.35	15.22	30.02	7.19	0.00561436	1.81631	up
c94337.graph_c1	166	415	783	37	80	32	7.57	19.78	33.48	1.56	3.31	1.56	3.13677e-05	-2.63231	down
c94366.graph_c1	166	526	528	1092	3823	448	6.28	29.93	22.5	35.42	115.94	15.71	0.0046941	2.22444	up
c94423.graph_c0	18	91	73	212	561	114	0.67	3.67	2.57	7.02	18.22	4.43	0.000430241	2.49553	up
c94436.graph_c0	76	143	115	211	442	136	4.66	9.54	6.73	11.53	23.4	8.76	0.00512106	1.48078	up
c94440.graph_c0	21	365	1271	6	17	16	0.83	17.49	53.23	0.22	0.57	0.66	0.000404812	-3.94382	down
c94445.graph_c0	4	6909	7551	49	206	19	0.22	410.55	393.15	2.38	9.69	1.09	0.00399115	-3.91759	down
c94464.graph_c0	829	3378	4456	462	804	317	24.19	107.09	123.66	11.93	20.1	9.69	0.00322051	-1.89033	down
c94469.graph_c0	40	78	133	193	256	123	2.05	4.35	6.5	8.8	11.35	6.62	0.00589775	1.56354	up
c94470.graph_c0	314	631	696	1114	1943	631	12.14	26.57	25.64	38.23	64.57	25.61	0.00204198	1.46862	up
c94496.graph_c0	22	75	55	4	12	6	0.51	1.89	1.21	0.08	0.24	0.15	0.00287716	-2.21212	down
c94497.graph_c0	29	4141	4814	7	33	5	1.15	166.78	169.77	0.24	1.03	0.2	4.57504e-07	-5.7386	down
c94500.graph_c1	52	142	136	19	19	16	2.28	6.76	5.67	0.74	0.72	0.74	0.000606977	-2.02485	down
c94500.graph_c2	44	268	272	25	18	18	3.76	17.99	15.8	1.76	1.32	1.9	0.00171191	-2.43968	down
c94534.graph_c0	23	1807	2974	14	25	63	0.47	40.49	58.3	0.26	0.44	1.36	0.00235651	-3.73593	down
c94543.graph_c0	48	410	807	39	78	23	2.18	20.26	34.9	1.57	3.08	1.1	0.00962741	-2.42021	down
c94549.graph_c0	25	1606	1577	30	9	21	0.36	25.44	21.84	0.39	0.11	0.32	0.000344655	-4.06668	down
c94563.graph_c1	46	79	86	265	323	124	2.23	4.18	3.99	11.45	13.51	6.34	4.05193e-05	2.04516	up
c94566.graph_c0	0	4	11	1933	4913	646	0	0.31	0.75	123.34	303.82	48.51	9.37549e-22	8.1807	up
c94568.graph_c0	1123	4077	3826	793	825	459	27.5	136.83	92.21	17.88	18.15	11.94	0.0058076	-1.55493	down
c94581.graph_c1	0	2	5	79	157	44	0	0.11	0.24	3.56	6.76	2.3	1.90642e-10	5.14646	up
c94595.graph_c0	25	187	66	3827	15891	1127	2.39	19.5	6.13	328.48	1322.14	113.46	1.94288e-11	5.78598	up
c94597.graph_c0	660	1319	1116	1627	3056	1113	11.97	25.55	17.52	23.9	42.45	21.64	0.00789451	1.20404	up
c94601.graph_c0	102	929	332	1	46	0	4.47	44.45	14.64	0.04	1.73	0	0.00628052	-3.61753	down
c94615.graph_c1	0	13	23	262	1168	112	0	0.31	0.48	5.07	21.9	2.57	3.29314e-06	4.87571	up
c94620.graph_c0	28	35	26	160	481	60	0.74	1.01	0.65	3.77	10.91	1.66	0.000273156	2.8408	up
c94628.graph_c0	39	7006	9165	11	7	5	1.49	219.74	291.83	0.35	0.2	0.22	5.69794e-10	-6.86801	down
c94643.graph_c0	26	87	31	175	620	91	0.7	2.54	0.79	4.16	14.28	2.56	0.00095819	2.63867	up
c94645.graph_c0	22	2142	3104	22	18	12	0.81	84.29	108.01	0.72	0.57	0.46	1.06662e-05	-4.90674	down
c94652.graph_c0	59	172	168	417	839	170	2.49	7.92	6.78	15.64	30.41	7.52	0.00100828	2.0692	up
c94667.graph_c0	0	3	7	5297	16769	2020	0	0.14	0.29	206.27	632.45	92.97	1.18772e-34	10.1265	up
c94677.graph_c0	28	1087	1711	28	29	25	5.16	219.26	304.17	4.72	4.74	4.87	0.000419566	-3.76138	down
c94677.graph_c1	101	3983	5527	112	108	70	2.93	125.6	152.55	2.88	2.69	2.13	0.00030379	-3.77208	down
c94685.graph_c0	40	122	112	327	965	124	1.32	4.38	3.36	9.56	27.27	4.15	0.000899582	2.46369	up
c94707.graph_c0	5	111	54	1794	499	576	0.12	4.39	2.17	86.53	16.05	32.03	1.61633e-05	4.21247	up
c94723.graph_c0	303	1286	1353	149	231	118	7.21	33.39	30.86	3.18	4.73	2.97	0.00083601	-1.97443	down
c94740.graph_c0	0	17	9	4967	13783	2063	0	0.54	0.25	128.3	344.81	63.12	1.47033e-25	8.83945	up
c94743.graph_c0	4	3	7	7351	20432	2771	0.54	0.44	0.91	899.56	2425.63	395.18	7.88458e-46	10.2225	up
c94748.graph_c0	65	91	87	275	570	160	2.54	3.87	3.69	9.54	19.15	6.56	5.04071e-05	2.20197	up
c94756.graph_c0	10	8	6	45	153	43	0.31	0.27	0.17	1.22	4.02	1.38	4.0794e-05	3.1882	up
c94764.graph_c0	300	504	641	33	48	56	10.85	19.81	22.07	1.06	1.49	2.13	3.55322e-06	-2.76762	down
c94768.graph_c1	19	73	48	0	7	3	1.61	4.6	2.65	0	0.36	0.28	0.00144357	-3.03536	down
c94816.graph_c0	41	87	107	1120	2938	404	1.17	2.73	2.98	28.38	73.68	12.46	7.41034e-11	4.22508	up
c94818.graph_c0	40	52	139	1	2	6	3.93	1.75	3.57	0.13	0.26	0.27	0.000195323	-3.59088	down
c94820.graph_c0	1	8	16	11586	32241	4346	0.03	0.27	0.48	323.9	872.71	143.89	1.42421e-39	10.1193	up
c94821.graph_c1	48	128	140	15	19	13	2.91	11.07	10.81	0.82	1	0.83	0.000187728	-2.18131	down
c94830.graph_c0	335	1297	631	105	74	93	8.22	33.69	14.67	2.19	1.45	2.24	0.000633285	-2.32616	down
c94831.graph_c0	14	22	29	333	1242	109	0.37	0.63	0.73	7.76	28.03	3.01	1.35987e-08	4.42628	up
c94853.graph_c2	208	409	464	643	1253	381	6.52	13.01	12.87	16.95	31.56	11.96	0.00750502	1.35839	up
c94855.graph_c0	55	257	62	9	11	10	5.55	28.28	6.01	0.82	0.97	1.06	0.000542068	-2.8505	down
c94860.graph_c0	20	1429	2222	33	30	21	0.72	55.61	75.73	1.05	0.92	0.79	0.000396989	-3.97413	down
c94870.graph_c0	79	296	470	23	34	20	3.85	15.89	21.87	1.01	1.44	1.04	4.32723e-05	-2.76462	down
c94871.graph_c1	15	11	14	76	218	43	0.65	0.49	0.77	3.02	8.97	2.25	9.8178e-05	2.94882	up
c94880.graph_c0	5	11	20	262	670	89	0.22	0.52	0.84	10.35	25.54	4.15	1.88773e-10	4.69778	up
c94897.graph_c0	4	7	11	39	213	27	0.11	0.21	0.29	0.95	5.06	0.78	6.84316e-05	3.46955	up
c94915.graph_c1	0	7	6	38	89	22	0	0.17	0.13	0.75	1.7	0.52	3.6347e-05	3.56143	up
c94928.graph_c0	196	54	22	4	2	8	6.27	2.16	1.01	0.18	0.05	0.3	0.00536877	-3.36441	down
c94936.graph_c0	213	601	439	689	1055	469	6.83	21.89	14.54	23.11	35.48	18.15	0.00980499	1.20622	up
c94966.graph_c0	14	81	52	209	720	66	0.63	3.99	2.24	8.4	28.05	3.13	0.00159451	2.77237	up
c94969.graph_c0	62	113	93	215	611	122	2.37	4.87	3.38	7.68	20.89	5.22	0.00250581	1.94124	up
c94982.graph_c0	27	102	110	480	1492	198	0.69	4.01	6.93	11.31	33.22	5.21	1.22406e-05	3.24006	up
c95001.graph_c0	71	198	236	463	1027	204	2.57	7.81	8.15	14.89	31.99	7.8	0.00250364	1.97398	up
c95011.graph_c0	12	218	196	1032	3444	438	0.49	13.3	10.47	42.17	141.59	21.44	0.000329777	3.47416	up
c95047.graph_c2	19	32	43	2	5	4	2.67	5.03	5.82	0.26	0.78	0.59	0.00262599	-2.47497	down
c95047.graph_c5	20	41	37	5	5	3	1.23	2.74	2.17	0.27	0.26	0.19	0.00227041	-2.33812	down
c95050.graph_c0	23	69	83	167	333	59	1.05	3.44	3.62	6.79	13.13	2.84	0.00833755	1.89693	up
c95057.graph_c0	131	112	132	495	1881	292	6.3	5.88	6.02	21.15	77.53	14.72	0.000520782	2.66818	up
c95065.graph_c0	221	696	247	30	45	17	30.7	105.7	32.99	3.78	5.5	2.49	7.00351e-07	-3.11726	down
c95066.graph_c0	7	2950	2934	34	60	8	0.27	124.12	108.11	1.17	1.99	0.32	0.000918118	-4.16951	down
c95070.graph_c0	150	3329	2956	124	242	93	3.64	90.97	70.95	2.69	5.27	2.64	0.00216864	-2.90658	down
c95076.graph_c0	350	1744	2117	118	273	89	8.27	45.02	47.66	2.49	5.55	2.22	0.000200082	-2.53762	down
c95087.graph_c1	413	1114	538	128	113	137	13.08	38.4	16.25	3.6	3.08	4.59	0.00627112	-1.82297	down
c95089.graph_c0	38	42	32	679	2355	269	0.85	1.02	0.68	13.48	45.27	6.33	1.29614e-09	4.53628	up
c95093.graph_c0	6	3678	4141	83	147	29	0.16	104.49	102.95	1.92	3.31	0.79	0.00921876	-3.4156	down
c95100.graph_c0	127	662	494	19	95	9	8.98	45.95	30.65	0.99	4.76	0.87	0.00120088	-2.83752	down
c95102.graph_c0	78	220	279	485	1339	204	2.34	7.56	8.36	13.33	36.38	6.65	0.00721603	1.98002	up
c95107.graph_c0	141	399	394	946	2167	430	4.19	12.69	11.59	24.96	52.54	13.26	0.000575775	2.13837	up
c95111.graph_c2	65	54	52	275	622	149	2.27	2.05	1.73	8.54	18.66	5.46	0.000232938	2.5567	up
c95116.graph_c1	38	1122	1724	24	64	13	0.75	24.11	32.43	0.42	1.08	0.27	0.000352693	-3.75086	down
c95118.graph_c1	1172	1598	1617	4821	9023	2819	17.73	26.21	23.21	64.37	116.58	44.56	2.20648e-05	2.10604	up
c95120.graph_c0	1990	1056	399	4	4	75	64.36	37.16	12.29	0.11	0.11	2.55	0.00329105	-3.79689	down
c95120.graph_c1	1208	493	129	1	5	43	46.13	20.81	5.12	0.03	0.2	1.72	0.00604035	-3.67505	down
c95122.graph_c0	3	256	622	1	22	1	0.06	11.25	24.55	0.02	0.38	0.02	0.00643225	-3.68305	down
c95157.graph_c1	26	84	72	298	743	90	0.76	2.62	1.96	7.57	18.29	2.73	0.000284975	2.71783	up
c95160.graph_c1	24	46	67	132	193	53	0.7	1.46	1.86	3.41	4.83	1.62	0.0056662	1.735	up
c95161.graph_c0	67	149	209	656	2485	305	3.05	10.19	12.38	27.44	100.37	14.74	5.67863e-05	3.01774	up
c95172.graph_c1	36	302	453	18	17	11	1.86	19.8	22.58	0.83	0.76	0.61	0.000225082	-3.17365	down
c95212.graph_c0	200	179	155	961	1256	573	2.86	2.78	2.1	12.12	15.31	8.57	6.1489e-05	2.47356	up
c95224.graph_c2	251	373	454	679	1380	433	4.96	8.57	8.66	12.01	23.76	8.85	0.00496349	1.44421	up
c95234.graph_c1	122	155	83	11	22	21	7.34	10.16	4.77	0.59	1.14	1.33	0.00356668	-2.24711	down
c95235.graph_c0	8	15	32	105	316	43	0.2	0.41	0.74	2.31	6.7	1.1	0.000121894	3.06973	up
c95240.graph_c0	15	29	28	141	377	44	0.29	0.61	0.51	2.4	6.21	0.89	9.55608e-05	2.94254	up
c95267.graph_c0	229	386	324	746	1428	502	8.9	16.32	12	25.76	47.73	20.48	0.000181234	1.75274	up
c95268.graph_c0	7	41	24	405	1530	218	0.25	1.37	0.7	11.07	40.45	7.05	1.09676e-10	4.79789	up
c95273.graph_c0	24	79	146	2	8	10	0.73	3.71	5.39	0.05	0.28	0.41	0.00362829	-2.71788	down
c95290.graph_c0	25	69	56	8	3	3	0.9	2.72	1.93	0.26	0.09	0.11	0.000867266	-2.69134	down
c95291.graph_c0	195	213	229	2524	6274	737	7.1	8.44	7.94	81.51	196.23	28.16	2.25773e-07	3.72345	up
c95304.graph_c0	62	162	135	11	8	16	1.91	4.57	4.06	0.25	0.16	0.61	0.000349106	-2.59652	down
c95306.graph_c0	247	911	693	85	185	56	5.61	27.34	19.09	1.96	3.96	1.27	0.000360509	-2.03731	down
c95320.graph_c0	13	25	41	4409	14432	2118	0.42	0.88	1.26	126.56	401.12	72	4.69675e-33	7.74025	up
c95334.graph_c0	24	150	152	19	18	4	2.85	19.46	17.31	2.04	1.87	0.5	0.00871442	-2.28694	down
c95334.graph_c1	74	363	284	39	48	23	4.67	23.32	15.41	2.22	2.38	1.62	0.000995783	-2.101	down
c95336.graph_c0	164	399	363	61	51	67	6.37	16.87	13.44	2.1	1.7	2.73	0.00613826	-1.73289	down
c95340.graph_c0	150	342	325	696	1381	369	5.9	14.65	12.19	24.32	46.75	15.25	0.00040144	1.84088	up
c95361.graph_c0	121	462	490	1150	2977	488	2.47	10.23	9.53	20.83	51.27	10.45	0.00144357	2.29336	up
c95363.graph_c0	2	9	8	7477	19998	2939	0.14	0.7	0.55	473.91	1236	219.67	6.9461e-49	10.0663	up
c95365.graph_c0	228	5125	7061	181	251	183	3.25	86.61	112.65	2.3	3.14	2.66	0.000958199	-3.23979	down
c95372.graph_c0	5	2	7	860	8482	540	0.2	0.09	0.27	31.31	298.91	23.23	1.52383e-17	7.96104	up
c95398.graph_c0	0	5	7	41	104	32	0	0.19	0.23	1.26	3.09	1.16	1.87213e-06	3.91596	up
c95402.graph_c0	2	2666	2441	38	77	7	0.08	117.66	95.41	1.38	2.72	0.3	0.00675266	-3.67823	down
c95405.graph_c0	102	1269	1679	76	135	58	1.85	25.02	29.6	1.22	2.86	1.51	0.00281722	-2.67151	down
c95436.graph_c0	4	63	44	2121	6615	728	0.12	1.97	1.21	54.06	171.41	23.3	1.32727e-12	6.04837	up
c95440.graph_c0	3	46	36	14591	42602	5500	0.04	0.67	0.46	172.96	488.79	77.42	4.32588e-29	8.88483	up
c95444.graph_c0	441	4116	4765	356	581	290	4.46	45.94	45.72	3.21	5.07	3.1	0.00828564	-2.1796	down
c95449.graph_c0	9	16	26	109	701	112	0.24	0.46	0.6	2.51	15.56	3.1	3.83775e-07	4.00501	up
c95465.graph_c0	68	88	120	11	21	14	5.76	7.76	9.68	0.83	1.47	1.29	0.000520131	-2.12609	down
c95465.graph_c1	77	133	156	14	44	13	4.63	8.71	8.96	0.75	2.28	0.82	0.00123274	-1.99022	down
c95465.graph_c2	109	217	275	29	70	26	3.51	7.62	8.46	0.83	1.93	0.89	0.000646449	-1.84919	down
c95479.graph_c0	0	3	1	36	173	20	0	0.11	0.03	1.04	4.84	0.68	5.90055e-07	5.11117	up
c95481.graph_c2	67	314	418	55	54	22	8.56	27.65	31.46	4.32	4.34	2.2	0.00931241	-1.96038	down
c95492.graph_c0	158	625	570	90	107	71	6.47	27.9	22.26	3.27	3.77	3.08	0.00282868	-1.73427	down
c95492.graph_c5	449	1552	1755	228	266	237	9.95	37.44	37.04	4.47	5.05	5.53	0.00505752	-1.71334	down
c95526.graph_c0	7	1451	1342	24	18	7	0.15	34.13	27.62	0.46	0.33	0.16	0.000505985	-4.16871	down
c95547.graph_c1	282	1203	1554	140	168	157	4.8	22.13	24.97	2.1	2.45	2.8	0.00429653	-1.98392	down
c95560.graph_c0	2	4	3	1212	5880	614	0.05	0.1	0.06	24.31	114.18	14.63	1.23525e-27	8.75169	up
c95589.graph_c0	1	9	41	471	1139	114	0.05	0.51	2.02	21.64	50.69	6.18	6.18244e-06	4.65977	up
c95597.graph_c0	135	226	210	396	870	213	2.5	4.75	3.85	6.82	14.7	4.35	0.00673135	1.55908	up
c95634.graph_c0	148	163	100	669	2088	318	2.66	3.17	1.7	10.58	31.94	5.96	0.000409772	2.73688	up
c95637.graph_c1	64	703	1893	58	50	52	1.33	16.41	37.61	0.85	0.81	1.07	0.00388354	-2.93959	down
c95640.graph_c3	1	61	87	326	946	143	0.03	1.81	2.26	7.89	22.19	4.1	0.00490647	3.13923	up
c95646.graph_c0	609	875	816	1985	4656	1047	18.03	27.07	20.83	44.86	104.04	28.92	0.00185539	1.85952	up
c95646.graph_c1	225	213	271	801	1845	384	16.42	16.56	18.26	50.44	112.59	28.46	0.00160552	2.11485	up
c95646.graph_c2	84	242	195	364	1079	189	1.81	5.69	4.03	7.02	20.1	4.32	0.00804943	1.82221	up
c95651.graph_c1	248	316	233	621	1117	394	3.98	5.51	3.56	8.81	15.34	6.63	0.00680068	1.58044	up
c95708.graph_c0	286	550	489	913	2408	634	8.6	18	14.01	24.34	62.17	20.02	0.0011395	1.77756	up
c95711.graph_c1	4	42	22	80	442	44	0.21	2.25	1.08	3.7	19.69	2.39	0.0021932	2.98011	up
c95713.graph_c0	78	102	66	240	708	133	4.65	7.06	4.04	12.87	36.81	8.51	0.0035005	2.11863	up
c95715.graph_c0	28	51	71	11	7	2	2.42	3.68	4.55	0.82	0.32	0.08	0.00415818	-2.31766	down
c95731.graph_c0	227	393	345	683	1358	407	10.06	19	15.07	27.13	52.47	20.2	0.0019165	1.57116	up
c95747.graph_c3	8	8	8	26	66	20	0.32	0.35	0.31	0.93	2.29	0.85	0.00227079	2.28634	up
c95755.graph_c0	145	93	47	4068	13847	1955	3.58	2.5	1.1	88.91	292.96	50.67	1.0545e-10	5.39948	up
c95765.graph_c0	38	2293	2662	84	127	35	0.97	68.01	68.79	2.02	2.93	0.97	0.00396445	-3.216	down
c95773.graph_c0	23	113	86	236	392	108	1.76	9.42	6.29	16.15	25.99	8.69	0.00185842	2.0506	up
c95774.graph_c0	0	0	0	494	2025	243	0	0	0	19.33	77.09	11.17	7.34283e-21	9.45129	up
c95776.graph_c1	468	400	85	16	36	39	27.29	24.28	4.4	0.73	1.58	2.2	0.00539738	-2.80514	down
c95778.graph_c1	753	665	959	86	224	77	49.26	21.28	38.1	4.56	18.51	8.53	0.000146236	-2.33031	down
c95781.graph_c1	523	1564	611	4663	14034	2155	24.55	79.93	27.35	194.61	567.31	106.25	4.49947e-05	2.97341	up
c95785.graph_c0	74	73	31	685	2085	255	3.27	3.52	1.31	26.96	79.41	11.88	1.30556e-05	3.69095	up
c95797.graph_c1	20	3453	4205	44	78	20	2.04	53.81	59.15	2.85	3.55	2.94	0.000326654	-4.22953	down
c95808.graph_c0	300	633	699	1412	3485	650	4.64	10.69	10.33	19.39	46.25	10.56	0.00204354	1.93806	up
c95826.graph_c1	83	543	228	24	39	29	2.33	19.42	7.44	0.63	0.9	0.92	0.000771836	-2.47484	down
c95828.graph_c0	0	5	19	786	1994	268	0	0.13	0.47	16.82	41.11	6.82	3.13329e-11	6.3336	up
c95830.graph_c0	0	0	0	225	216	133	0	0	0	10	9.29	7.13	3.3622e-16	8.27651	up
c95838.graph_c1	74	1098	1266	54	64	18	3.7	46.11	46.94	1.98	2.36	0.73	0.000447056	-3.24413	down
c95852.graph_c0	32	74	82	102	248	89	0.98	2.46	2.38	2.76	6.5	2.85	0.0058076	1.52755	up
c95871.graph_c0	20	2410	3940	9	2	0	0.97	137.18	194.37	0.47	0.12	0	1.32864e-06	-6.0562	down
c95874.graph_c0	3	784	645	6774	16635	2214	0.08	21.66	15.59	152.62	364.21	59.01	0.00246193	3.71649	up
c95879.graph_c0	22	134	126	360	1229	252	0.57	3.93	3.79	9.96	30.23	8.76	0.000146045	2.8725	up
c95883.graph_c0	335	371	365	962	2353	513	7.11	9.04	7.37	18.61	42.64	11.39	0.00426246	1.88232	up
c95910.graph_c0	19	56	63	379	1018	107	0.29	0.94	0.92	5.15	13.37	1.72	6.30113e-06	3.43485	up
c95918.graph_c0	0	2	20	2341	7693	870	0	0.08	0.68	73.79	234.79	32.45	1.18309e-13	7.59955	up
c95928.graph_c0	26	1012	1361	8	40	7	0.8	30.79	38.49	0.25	0.96	0.2	0.000102034	-4.22514	down
c95932.graph_c0	31	80	57	270	702	115	1.79	5.02	3.19	13.88	34.97	7.02	2.53417e-05	2.78756	up
c95934.graph_c0	232	311	253	616	941	534	6.47	8.57	6.78	12.01	16.6	11.26	0.00111236	1.65828	up
c95940.graph_c0	64	368	715	19	23	15	2.48	16.99	28.3	0.76	0.8	0.67	2.32269e-05	-3.42856	down
c95955.graph_c0	34	517	660	17	52	24	3.37	43.92	49.96	1.09	3.23	2.01	0.00353385	-2.80689	down
c95957.graph_c0	177	333	358	640	1353	417	4.37	10.24	9.21	15.02	29.15	11.5	0.000358818	1.73172	up
c95975.graph_c0	18	83	31	241	864	77	0.72	3.56	1.14	9.73	32.84	3.13	0.000432625	3.08703	up
c95978.graph_c0	96	140	155	22	35	28	3.78	6.4	6.12	0.82	1.21	1.22	0.00245345	-1.73817	down
c95989.graph_c0	6	7252	8648	39	113	20	0.09	114.09	119.01	0.5	1.4	0.3	0.000465153	-4.53723	down
c95995.graph_c0	33	1207	677	42	66	18	0.86	27.81	13.49	0.76	1.11	0.5	0.00429653	-2.95349	down
c95998.graph_c0	60	123	137	239	713	167	2.67	6.23	5.89	9.23	26.48	7.76	0.000977973	1.99085	up
c96016.graph_c0	21	627	447	4154	15838	1393	0.49	17.31	12.05	88.94	330.15	34.51	0.000120278	4.00892	up
c96018.graph_c0	83	195	133	494	610	390	2.89	7.35	4.41	15.17	18.16	14.2	3.74059e-07	2.24253	up
c96022.graph_c0	7	27	37	105	349	42	0.23	0.97	1.16	3.06	9.85	1.45	0.000653116	2.83987	up
c96038.graph_c0	101	177	276	20	19	22	8.52	7.73	10.81	0.97	0.91	1.18	4.75612e-05	-2.5425	down
c96064.graph_c0	22	14704	17065	11	14	0	0.45	324.04	329.37	0.2	0.24	0	7.74957e-07	-6.39392	down
c96066.graph_c0	323	1853	3846	218	406	135	5.92	43.34	81.22	3.56	6.44	2.6	0.00687499	-2.29674	down
c96071.graph_c0	4	96	48	226	846	93	0.11	2.85	1.22	5.58	20.72	2.77	0.00430799	2.94204	up
c96074.graph_c0	0	11	15	1627	5044	642	0	0.41	0.49	49.48	148.49	23.1	2.0114e-17	7.45218	up
c96079.graph_c1	37	3489	4081	73	122	54	0.57	74.22	76.94	1.1	1.95	1.22	0.00139149	-3.61992	down
c96102.graph_c0	68	181	175	259	619	173	2.37	6.88	5.82	8.02	18.56	6.35	0.00484475	1.59026	up
c96140.graph_c0	548	5304	6578	327	678	241	19.2	216.11	215.21	13.36	26.58	10.26	0.00201196	-2.57995	down
c96144.graph_c0	0	1	11	331	1060	68	0	0.01	0.13	3.77	11.67	0.92	6.45923e-08	5.87463	up
c96149.graph_c1	39	2084	1138	31	52	35	1.21	70.29	33.63	0.85	1.38	1.14	0.000669705	-3.55343	down
c96152.graph_c0	85	119	95	257	321	201	6.85	10.45	7.33	18.53	22.43	17.03	0.00126613	1.67625	up
c96164.graph_c2	21	293	210	12	18	6	0.36	9.9	6.09	0.57	0.96	0.16	0.000846364	-2.99992	down
c96167.graph_c0	0	3	10	2469	7878	1057	0	0.23	0.53	120.26	375.35	63.79	5.77196e-25	8.82848	up
c96179.graph_c0	476	8880	11292	451	906	296	5.02	99.06	110.08	4.15	8.37	3.38	0.00397286	-2.77707	down
c96192.graph_c0	0	1	0	38	221	27	0	0.04	0	1.61	8.34	1.34	1.16415e-08	6.27721	up
c96195.graph_c7	78	98	88	557	1655	255	2.36	3.22	2.53	14.94	42.95	8.09	4.45445e-06	3.14065	up
c96198.graph_c0	45	149	231	19	19	17	1.29	7.97	12.24	0.49	0.75	0.49	0.00163229	-2.24123	down
c96199.graph_c0	25	321	475	9	16	15	0.44	6.19	8.12	0.14	0.25	0.28	0.000605892	-3.27231	down
c96211.graph_c0	1	7	8	271	767	151	0.05	0.33	0.3	9.12	26.94	6.38	3.41811e-17	6.03176	up
c96215.graph_c0	138	3396	3889	124	139	104	5.52	214.59	211	4.34	4.58	4.2	0.000915367	-3.2372	down
c96216.graph_c0	139	311	280	368	785	332	1.61	4.2	3.21	4.05	7.8	4.07	0.00306109	1.35875	up
c96217.graph_c0	26	222	321	3	3	11	2.62	24.43	30.92	0.28	0.27	1.18	0.000393285	-3.65529	down
c96221.graph_c0	172	506	499	1120	2564	701	5.07	16.21	14.02	29.23	64.78	21.67	6.48816e-05	2.17312	up
c96228.graph_c1	675	2806	3736	390	633	345	6.44	29.29	33.18	3.71	4.78	3.54	0.00593999	-1.7899	down
c96229.graph_c0	186	1226	1174	53	161	116	3.51	22.83	18.44	0.83	2.41	2.17	0.00636609	-2.21163	down
c96236.graph_c1	46	1001	1213	37	55	29	3.75	88.99	95.13	2.7	3.89	2.49	0.000918118	-3.20104	down
c96236.graph_c2	57	1229	1545	53	71	17	2.84	61.52	73.53	2.3	2.65	0.85	0.000800567	-3.33461	down
c96243.graph_c1	421	687	991	4179	2365	2244	12.08	18.55	21.8	156.07	83.86	97.57	6.76451e-05	2.45036	up
c96245.graph_c0	21	1112	1693	20	27	12	0.24	15.61	22.11	0.22	0.27	0.16	0.000101717	-4.1969	down
c96250.graph_c0	77	1023	1153	72	115	50	3.18	41.92	38.69	2.35	3.97	1.76	0.00666307	-2.43868	down
c96268.graph_c0	491	726	853	3966	8031	2118	9.38	15.09	15.52	67.01	131.35	42.48	3.14159e-09	2.92411	up
c96271.graph_c0	27	62	45	192	505	52	0.52	1.3	0.88	3.42	8.67	1.1	0.00162373	2.48803	up
c96278.graph_c0	2	8	14	64	265	26	0.04	0.18	0.27	1.19	4.68	0.56	4.92584e-05	3.70096	up
c96280.graph_c1	34	197	151	13	26	15	0.78	4.89	3.28	0.26	0.51	0.36	0.00294523	-2.15879	down
c96296.graph_c0	225	436	376	581	1032	388	7.73	16.33	12.31	17.7	30.45	14.02	0.00549542	1.25005	up
c96297.graph_c0	75	255	114	5	19	17	2.57	8.4	2.84	0.23	1.31	0.45	0.00055048	-2.72351	down
c96299.graph_c2	139	761	344	61	63	66	8.73	52.76	21.18	3.41	3.39	4.33	0.00696698	-1.97256	down
c96299.graph_c3	37	438	289	18	15	21	5.52	43.68	20.76	2.44	1.97	2.84	0.00165253	-2.8074	down
c96301.graph_c0	4	3	4	4342	19428	974	0.2	0.16	0.19	194.53	842.99	51.52	3.25123e-28	9.57266	up
c96305.graph_c0	25	51	63	1	4	3	0.95	2.11	2.28	0.03	0.13	0.12	3.1294e-05	-3.38534	down
c96314.graph_c0	3	31	41	2526	9511	832	0.13	1.46	1.67	96.19	351.71	37.36	1.40378e-15	6.85418	up
c96319.graph_c0	72	328	310	995	2607	425	1.5	7.41	6.13	18.29	46.41	9.27	0.000232938	2.67239	up
c96356.graph_c0	211	598	555	1352	3104	735	3.75	11.53	9.47	21.11	47.82	14.1	0.000127001	2.17167	up
c96357.graph_c0	126	396	446	15	13	20	2.08	7.12	7	0.22	0.18	0.35	1.04417e-07	-3.50553	down
c96357.graph_c1	23	141	130	8	6	3	2.3	15.38	12.45	0.72	0.52	0.32	7.04873e-05	-3.25797	down
c96362.graph_c0	0	7	6	7338	20166	2257	0	1.14	0.86	995.72	2664.07	356.65	6.77623e-36	10.1595	up
c96366.graph_c0	71	1381	1599	103	106	53	1.64	38.47	36.28	2.13	2.08	1.3	0.00760352	-2.60584	down
c96380.graph_c0	9	36	64	160	931	86	0.26	1.14	1.77	4.12	23.19	2.62	0.000387856	3.29512	up
c96391.graph_c0	343	306	299	15	9	19	5.87	6.11	5.09	0.23	0.12	0.32	7.70686e-07	-3.75371	down
c96393.graph_c2	72	106	135	266	904	108	1.28	3.71	3.89	4.91	13.89	2.21	0.00944106	2.03186	up
c96400.graph_c0	20	64	32	5	10	4	0.76	2.82	1.16	0.17	0.38	0.19	0.00867324	-2.06498	down
c96405.graph_c2	42	209	302	17	9	25	5.26	28.74	36.45	1.92	0.99	3.3	0.00924902	-2.42002	down
c96425.graph_c0	235	423	598	84	72	85	8.55	16.69	20.66	2.7	2.27	3.24	0.00419208	-1.77304	down
c96429.graph_c0	65	173	80	457	1430	145	2.39	6.95	2.83	14.91	45.18	5.6	0.00120774	2.6359	up
c96442.graph_c0	36	4513	5572	91	176	24	0.4	54.6	58.97	0.89	1.67	0.28	0.00155912	-3.77649	down
c96445.graph_c2	0	2	2	28	158	25	0	0.05	0.04	0.56	3.07	0.59	4.34673e-07	5.06405	up
c96447.graph_c0	45	99	73	220	482	123	2.72	6.36	3.95	11.71	24.69	7.65	0.000135254	2.13011	up
c96452.graph_c0	135	266	211	435	728	280	5.45	11.7	8.12	15.6	25.29	11.88	0.000622124	1.53495	up
c96453.graph_c2	23	362	226	17	24	16	1.03	17.73	9.7	0.68	0.94	0.76	0.00572061	-2.5272	down
c96462.graph_c0	632	1813	2345	193	346	226	22.53	70.33	79.63	6.1	10.62	8.46	0.000171535	-2.06893	down
c96466.graph_c2	559	782	634	1430	2531	845	18.98	28.86	20.5	43.03	73.74	30.09	0.00654455	1.4767	up
c96485.graph_c0	20	22899	24808	157	283	7	0.97	1379.19	1169.88	6.94	13.4	0.39	0.000953369	-4.48783	down
c96486.graph_c0	29	364	351	23	5	10	1.65	23.71	24.28	1.33	0.29	0.79	0.00236888	-3.09865	down
c96491.graph_c0	4	5	15	5085	14255	1798	0.22	0.3	0.8	253.42	688.24	105.71	2.52204e-35	9.10477	up
c96497.graph_c0	64	164	200	394	742	153	1.53	4.26	4.55	8.33	15.19	3.84	0.00460028	1.8346	up
c96500.graph_c1	459	3685	4414	85	127	121	8.46	73.75	77.47	1.39	2.03	2.36	1.56371e-06	-3.70821	down
c96512.graph_c0	138	959	1056	55	207	57	2.86	20.19	22.77	1.01	3.69	1.24	0.00961688	-2.15404	down
c96518.graph_c0	197	382	385	521	1018	381	13.56	27.26	24.81	31.5	58.09	26.63	0.00380313	1.30114	up
c96524.graph_c0	15	2346	2846	21	6	8	0.51	89.13	94.75	0.66	0.19	0.3	1.56824e-05	-5.0935	down
c96529.graph_c0	1	0	1	84	218	23	0.03	0	0.03	2.33	5.85	0.75	2.62831e-09	6.04643	up
c96530.graph_c0	129	269	236	511	920	285	9.57	21.63	16.65	33.73	58.76	22.15	0.000389166	1.70975	up
c96536.graph_c0	0	0	0	37	126	36	0	0	0	2.12	7.01	2.36	2.18088e-09	6.77826	up
c96547.graph_c0	38	226	287	1919	5590	480	1.1	7.09	7.68	46.7	136.68	14.88	1.47657e-05	3.77824	up
c96548.graph_c0	29	1997	2587	62	133	29	0.42	30.8	35.2	0.8	1.66	0.44	0.00472739	-3.24053	down
c96566.graph_c0	6	16	7	251	2244	431	0.25	0.73	0.29	9.42	81.32	19.14	1.15418e-14	6.16913	up
c96573.graph_c0	4	51	56	194	583	51	0.1	1.37	1.32	4.24	12.34	1.32	0.00394811	2.88056	up
c96575.graph_c0	22	2862	3316	9	3	12	0.48	81.37	82.49	0.21	0.07	0.34	1.56802e-06	-5.58614	down
c96582.graph_c1	10	23	30	88	448	47	0.34	0.81	1	2.68	13.08	1.66	0.000231644	3.10261	up
c96607.graph_c0	0	0	1	76	138	41	0	0	0.03	2.12	3.73	1.35	2.10433e-11	6.61518	up
c96613.graph_c0	29	58	63	9	3	6	6.96	10.1	8.64	2.93	0.31	2	0.00398565	-2.34135	down
c96633.graph_c0	3	30	26	169	627	53	0.09	1.18	0.78	5.04	18.52	1.95	6.54867e-05	3.70696	up
c96635.graph_c0	564	16077	20064	763	1479	605	6.54	187.98	209.7	7.33	13.63	6.91	0.00795519	-2.73523	down
c96639.graph_c0	49	35	52	4	4	8	1.99	1.59	2.1	0.1	0.16	0.24	0.00695709	-2.45525	down
c96641.graph_c1	1050	3295	4099	218	436	138	19.91	68.3	74.38	4.15	7.11	2.62	7.81196e-08	-2.89905	down
c96643.graph_c0	242	794	1337	95	172	102	6.52	23.28	34.29	2.27	3.97	2.88	0.00185557	-2.0603	down
c96645.graph_c1	443	5918	8199	379	467	265	21.5	312.13	378.78	16.36	19.48	13.48	0.00194632	-2.79987	down
c96649.graph_c0	339	157	270	1133	2817	633	10.03	5.05	7.61	29.72	71.95	19.65	0.00318132	2.39603	up
c96665.graph_c0	896	4763	4365	248	204	507	17.31	100.64	80.34	4.22	3.38	10.29	0.00629763	-2.3901	down
c96686.graph_c0	393	189	49	9	0	13	12.23	6.42	1.43	0.24	0	0.41	0.00746135	-3.49951	down
c96703.graph_c0	2	10	1	7637	21657	2891	0.07	0.38	0.03	239.15	656.63	107.13	2.70117e-36	10.1789	up
c96717.graph_c0	94	86	86	17	21	16	3.2	3.21	2.79	0.51	0.61	0.57	0.0068202	-1.90584	down
c96723.graph_c0	185	206	199	598	1058	586	3.21	3.01	2.55	7.46	12.21	8.26	5.66957e-05	2.135	up
c96734.graph_c1	74	687	392	30	61	36	2.67	27.55	13.57	0.89	1.76	1.27	0.00208549	-2.4245	down
c96738.graph_c0	80	189	165	678	1811	348	3.5	8.99	6.88	26.34	68.15	16.94	1.67755e-06	2.83881	up
c96750.graph_c0	1	185	67	2981	10717	1255	0.06	11.13	3.53	146.6	510.59	72.82	4.289e-06	5.15088	up
c96761.graph_c0	828	2907	2724	253	375	334	11.99	45.75	37.51	3.23	4.65	5.07	0.000331334	-2.09592	down
c96762.graph_c0	204	765	626	95	163	94	5.32	22.06	15.02	2.09	4.02	2.47	0.00303574	-1.63149	down
c96768.graph_c0	116	337	293	562	920	306	3.17	10.01	8.84	13.59	21.82	8.77	0.0016078	1.60232	up
c96772.graph_c0	81	4646	5859	45	63	42	1.83	114.11	125.93	0.9	1.22	1	8.33258e-06	-4.64898	down
c96776.graph_c0	40	404	492	31	41	12	2.27	24.9	26.57	1.56	2	0.71	0.00234654	-2.68759	down
c96791.graph_c1	336	907	1046	206	213	147	21.91	64.41	64.65	11.99	12.01	10.08	0.00593999	-1.4633	down
c96796.graph_c0	252	314	279	826	2064	391	9.18	12.45	9.69	26.72	64.65	14.99	0.00308761	1.99115	up
c96817.graph_c0	25	309	563	21	12	12	5.37	20.79	32.43	4.06	1.96	3.6	0.0012817	-3.1891	down
c96835.graph_c0	149	211	129	1791	5284	710	1.94	2.97	1.6	20.48	58.49	9.65	7.62967e-08	3.81291	up
c96846.graph_c0	32	263	201	8	5	10	3.8	33.23	22.28	0.83	0.51	1.22	0.00012221	-3.35508	down
c96846.graph_c1	178	1550	1076	60	24	43	6.86	89.16	54.28	2	0.92	1.94	6.28203e-05	-3.39533	down
c96846.graph_c2	36	690	505	8	8	21	2.53	91.25	58.58	0.5	0.53	1.57	0.000370453	-3.6486	down
c96847.graph_c2	114	26	23	0	2	3	3.79	0.96	0.73	0	0.05	0.12	0.00134884	-3.92944	down
c96849.graph_c0	21	22	11	81	134	45	0.56	0.63	0.28	1.9	3.05	1.25	0.00180565	2.29653	up
c96888.graph_c0	44	298	303	23	24	19	1.54	11.24	9.95	0.7	0.7	0.7	0.00111081	-2.49449	down
c96895.graph_c0	34	42	44	274	636	117	5.04	8.89	6.46	37.43	88.22	17.96	1.28897e-06	3.09499	up
c96918.graph_c0	7	13	11	42	166	23	0.21	0.42	0.31	1.09	4.18	0.71	0.000488157	2.82907	up
c96951.graph_c0	39	262	150	1073	2582	537	1.22	8.89	4.45	29.65	69.11	17.57	1.6913e-06	3.38563	up
c96957.graph_c0	41	114	67	10	10	12	1.8	5.43	2.8	0.39	0.38	0.55	0.00204198	-2.15664	down
c96959.graph_c0	89	179	178	548	1478	254	3.83	8.38	7.31	20.93	54.7	11.47	0.000107278	2.46178	up
c96962.graph_c0	7	30	41	163	525	44	0.32	1.53	1.74	6.55	21.47	2.5	0.000349912	3.17481	up
c96968.graph_c0	26	46	40	113	177	66	1.14	2.2	1.68	4.42	6.71	3.05	0.000146454	1.93582	up
c96970.graph_c0	32	345	250	20	16	18	0.64	8.47	5.84	0.35	0.32	0.38	0.00282165	-2.59981	down
c96975.graph_c0	271	1397	1064	151	128	121	6.13	34.27	22.87	3.02	2.47	2.86	0.0024058	-2.04632	down
c96982.graph_c0	202	517	673	116	162	88	30.14	79.72	94.77	14.37	20.34	12.72	0.00686456	-1.41964	down
c97012.graph_c0	10	61	28	150	631	67	0.42	2.82	1.12	5.58	22.68	2.99	0.000466625	3.06413	up
c97019.graph_c0	329	1934	2004	227	293	193	4.01	25.64	23.28	2.44	3.06	2.47	0.00712903	-1.89213	down
c97025.graph_c1	35	346	319	20	45	13	2.52	27.22	22.01	1.29	2.8	0.98	0.00389192	-2.46161	down
c97028.graph_c0	106	210	230	844	2385	395	3.06	6.7	6.41	21.7	60.66	12.41	9.03437e-06	2.8132	up
c97036.graph_c0	72	216	217	651	1641	247	4.13	13.68	11.92	34.01	82.36	14.95	0.000363324	2.47346	up
c97044.graph_c0	577	558	174	10	24	10	42	47.46	11.74	0.9	1.65	0.78	7.46109e-08	-4.36584	down
c97057.graph_c0	221	384	409	77	125	56	10.33	19.54	18.23	3.24	5.03	2.75	0.000278243	-1.58567	down
c97066.graph_c0	143	1888	1932	105	98	148	10.37	146.42	128.82	7.1	5.48	11.85	0.00983919	-2.4569	down
c97069.graph_c0	45	228	75	14	12	16	1.42	7.85	2.26	0.39	0.33	0.53	0.0066554	-2.25136	down
c97074.graph_c0	61	79	55	272	826	110	0.97	1.36	0.83	3.81	11.19	1.83	0.00100322	2.52971	up
c97077.graph_c0	96	317	220	566	907	290	5.92	20.09	13	30.44	47.05	18.32	0.000808999	1.80855	up
c97079.graph_c0	0	14	9	40	89	40	0	0.39	0.22	0.92	1.98	1.09	0.000527968	3.08916	up
c97090.graph_c0	78	148	147	242	891	154	2.62	4.69	4.55	5.98	20.6	5.1	0.00739955	1.88083	up
c97096.graph_c1	31	8615	11611	14	31	5	0.61	144.05	168.52	0.19	0.44	0.11	4.53862e-08	-6.31948	down
c97103.graph_c0	670	2494	2419	148	203	340	9.31	43.15	35.88	1.85	2.43	5.02	0.00544624	-2.17504	down
c97105.graph_c0	4	2457	2828	45	23	5	0.09	113.56	104.65	2.07	1	0.12	0.00145179	-4.17025	down
c97110.graph_c0	3650	397	2817	135	299	208	128.47	14.75	94.35	4.1	8.9	7.58	0.0046941	-2.92187	down
c97115.graph_c0	50	92	86	236	988	127	2.05	4.04	3.3	8.44	34.23	5.37	0.000767814	2.53924	up
c97117.graph_c0	12	34	21	66	155	70	0.34	1.06	0.57	1.67	3.8	2.12	3.41409e-05	2.40227	up
c97119.graph_c0	597	708	793	1437	2838	1027	12.98	16.6	16.41	27.65	52.68	23.44	0.00377379	1.53095	up
c97123.graph_c0	329	4129	4436	153	305	139	7.92	107.83	101.83	3.24	6.29	3.5	0.00031754	-3.04764	down
c97128.graph_c0	481	3512	722	146	137	193	8.32	66.06	11.88	2.23	2.03	3.5	0.00796642	-2.38613	down
c97134.graph_c1	0	0	0	28	24	45	0	0	0	4.62	3.48	8	6.39407e-07	6.06145	up
c97135.graph_c0	156	1118	1252	119	135	83	2.78	21.67	21.13	1.9	2.08	1.55	0.00470181	-2.16287	down
c97137.graph_c1	122	238	277	40	33	49	9.14	18.47	17.91	2.84	2.05	4.22	0.00980499	-1.74118	down
c97137.graph_c4	188	342	407	42	43	58	14.51	27.24	28.57	2.95	3.17	4.64	0.000974586	-2.08023	down
c97150.graph_c0	1	20	6	2093	6476	798	0.03	0.65	0.17	55.65	166.7	25.15	1.165e-20	7.791	up
c97169.graph_c0	105	220	242	434	829	232	6.49	14.63	14.36	24.09	44.09	14.66	0.00143364	1.66848	up
c97169.graph_c1	169	350	313	549	1097	329	7.41	12.87	10.01	16.32	28.83	14.66	0.00232588	1.51424	up
c97178.graph_c0	183	94	64	538	1951	237	4.32	2.42	1.44	11.25	39.51	5.87	0.00993717	2.53148	up
c97179.graph_c0	65	206	246	2513	7609	978	1.97	6.48	7.05	66.06	190.91	28.38	1.87732e-10	4.39469	up
c97180.graph_c1	292	676	882	147	232	132	8.54	24.11	22.29	5.35	7.91	5.7	0.00642943	-1.36608	down
c97184.graph_c2	185	6186	7296	112	396	80	3.05	114.21	116.68	1.61	5.53	1.37	0.0007592	-3.52705	down
c97198.graph_c3	1	828	1162	8	28	9	0.02	26.05	30.04	0.67	1.19	0.88	0.00417707	-3.76602	down
[truncated: 346 more rows]

## Sheet: Table S5
#ID	T01_Count	T02_Count	T03_Count	T04_Count	T05_Count	T06_Count	T01_FPKM	T02_FPKM	T03_FPKM	T04_FPKM	T05_FPKM	T06_FPKM	FDR	log2FC	regulated	COG_class	COG_class_annotation	GO_annotation	KEGG_annotation	KOG_class	KOG_class_annotation	Pfam_annotation	Swissprot_annotation	TrEMBL_annotation	eggNOG_class	eggNOG_class_annotation	nr_annotation
c103635.graph_c0	559	4270	6014	419	693	288	5.92	50.39	60.14	3.92	6.39	3.29	0.00581274	-2.24137	down	--	--	Cellular Component: cellular_component (GO:0005575);; Cellular Component: intracellular (GO:0005622);; Cellular Component: obsolete cell (GO:0005623);; Cellular Component: nucleus (GO:0005634);; Cellular Component: organelle (GO:0043226);; Cellular Component: membrane-bounded organelle (GO:0043227);; Cellular Component: intracellular organelle (GO:0043229);; Cellular Component: intracellular memb…	--	[S]	Function unknown	Chromosome segregation during meiosis;; Domain of unknown function (DUF4210)	Protein FAM214A OS=Xenopus tropicalis OX=8364 GN=fam214a PE=2 SV=1	DUF4210 domain-containing protein OS=Seriola lalandi dorsalis OX=1841481 PE=3 SV=1	S	Function unknown	protein FAM214B-like [Seriola lalandi dorsalis]
c98994.graph_c1	91	232	178	522	1436	177	2.79	7.77	5.19	14.17	37.78	5.69	0.0035005	2.17362	up	[H]	Coenzyme transport and metabolism	Molecular Function: catalytic activity (GO:0003824);; Biological Process: biosynthetic process (GO:0009058);; Cellular Component: integral component of membrane (GO:0016021);; Molecular Function: pyridoxal phosphate binding (GO:0030170);;	K00654|2.7e-262|sdu:111221174|K00654 serine palmitoyltransferase [EC:2.3.1.50] | (RefSeq) sptlc1; serine palmitoyltransferase 1	[O]	Posttranslational modification, protein turnover, chaperones	Aminotransferase class I and II	--	Aminotran_1_2 domain-containing protein OS=Seriola dumerili OX=41447 PE=4 SV=1	O	Posttranslational modification, protein turnover, chaperones	serine palmitoyltransferase 1 [Seriola dumerili]
c106080.graph_c0	148	438	407	1488	4872	656	1.86	8.77	7.26	63.54	195.99	29.8	4.55e-05	2.88768	up	--	--	Biological Process: reproduction (GO:0000003);; Biological Process: cell fate specification (GO:0001708);; Biological Process: neuron migration (GO:0001764);; Biological Process: nematode larval development (GO:0002119);; Biological Process: larval development (GO:0002164);; Biological Process: developmental process involved in reproduction (GO:0003006);; Cellular Component: cellular_component (G…	K19928|1.7e-76|lcf:108880306|K19928 zona pellucida sperm-binding protein 3 | (RefSeq) zona pellucida sperm-binding protein 3-like	--	--	Zona pellucida-like domain	Zona pellucida sperm-binding protein 3 OS=Gallus gallus OX=9031 GN=ZP3 PE=1 SV=4	DUF4211 domain-containing protein OS=Seriola lalandi dorsalis OX=1841481 PE=4 SV=1	S	Function unknown	proline-rich protein 12-like isoform X1 [Seriola lalandi dorsalis]
c87981.graph_c0	280	764	865	1476158	691751	868334	9.6	28.41	28.16	44712.8	20336.6	31246.6	5.88e-75	10.6368	up	--	--	Biological Process: binding of sperm to zona pellucida (GO:0007339);; Biological Process: egg coat formation (GO:0035803);; Molecular Function: structural constituent of egg coat (GO:0035804);;	K19928|3.9e-199|sdu:111228595|K19928 zona pellucida sperm-binding protein 3 | (RefSeq) zona pellucida sperm-binding protein 3-like	--	--	Zona pellucida-like domain	Zona pellucida sperm-binding protein 3 OS=Gallus gallus OX=9031 GN=ZP3 PE=1 SV=4	Zona pellucida sperm-binding protein 3 OS=Seriola dumerili OX=41447 PE=3 SV=1	T	Signal transduction mechanisms	zona pellucida sperm-binding protein 3-like [Seriola dumerili]
c105961.graph_c0	72	77	80	309	899	102	1.44	1.58	1.45	5.32	14.42	2.23	0.002646	2.39887	up	--	--	--	--	--	--	--	--	Uncharacterized protein OS=Perca fluviatilis OX=8168 GN=PFLUV_G00101610 PE=4 SV=1	K	Transcription	uncharacterized protein LOC111661819 [Seriola lalandi dorsalis]
c100205.graph_c0	120	358	476	760	1555	421	1.8	5.84	6.79	10.07	19.94	6.62	0.00314147	1.8221	up	--	--	Molecular Function: RNA binding (GO:0003723);; Cellular Component: nucleolus (GO:0005730);;	K14544|0.0e+00|sdu:111229276|K14544 U3 small nucleolar RNA-associated protein 22 | (RefSeq) nol6; nucleolar protein 6	[S]	Function unknown	Nrap protein nucleotidyltransferase domain 4;; Nrap protein PAP/OAS1-like domain 5;; Nrap protein PAP/OAS-like domain;; Nrap protein domain 1;; Nrap protein domain 3;; Nrap protein domain 6	Nucleolar protein 6 OS=Xenopus tropicalis OX=8364 GN=nol6 PE=2 SV=1	Nucleolar protein 6 OS=Seriola lalandi dorsalis OX=1841481 PE=3 SV=1	J	Translation, ribosomal structure and biogenesis	nucleolar protein 6 [Seriola lalandi dorsalis]
c97215.graph_c0	25	411	742	1	7	0	1.4	26.04	39.47	0.05	0.36	0	6.73e-07	-5.52691	down	--	--	--	--	--	--	--	--	Uncharacterized protein OS=Perca fluviatilis OX=8168 GN=PFLUV_G00073890 PE=4 SV=1	--	--	PREDICTED: centrosomal protein of 152 kDa-like [Lates calcarifer]
c107758.graph_c0	30	91	163	12	21	3	3.05	10.08	15.87	1.08	1.83	0.32	0.00418172	-2.3965	down	--	--	Biological Process: regulation of transcription, DNA-templated (GO:0006355);; Cellular Component: H4/H2A histone acetyltransferase complex (GO:0043189);;	--	--	--	--	--	Uncharacterized protein OS=Maylandia zebra OX=106582 PE=3 SV=1	--	--	--
c79293.graph_c0	3	3	0	3912	12086	1605	0.2	0.31	0	240.25	744.42	116.62	7.28e-33	10.0004	up	[G]	Carbohydrate transport and metabolism	Molecular Function: channel activity (GO:0015267);; Cellular Component: integral component of membrane (GO:0016021);;	K09864|4.0e-137|sdu:111231217|K09864 aquaporin-1 | (RefSeq) aquaporin-1-like	[G]	Carbohydrate transport and metabolism	Major intrinsic protein	Aquaporin FA-CHIP OS=Pelophylax esculentus OX=8401 GN=AQPA PE=2 SV=1	Uncharacterized protein OS=Seriola lalandi dorsalis OX=1841481 PE=3 SV=1	G	Carbohydrate transport and metabolism	aquaporin-1-like [Seriola lalandi dorsalis]
c98382.graph_c1	46	222	275	1	1	0	1.68	15.25	15.26	0.06	0.05	0	5.76e-11	-6.29767	down	--	--	--	--	--	--	--	--	Uncharacterized protein OS=Larimichthys crocea OX=215358 GN=D5F01_LYC15291 PE=4 SV=1	--	--	hypothetical protein D5F01_LYC07852 [Larimichthys crocea]
c103942.graph_c0	340	1027	1389	122	191	97	4.88	16.6	19.01	1.61	2.47	1.56	5.55e-05	-2.19208	down	--	--	Biological Process: protein ubiquitination (GO:0016567);; Cellular Component: SCF ubiquitin ligase complex (GO:0019005);; Cellular Component: Cul4-RING E3 ubiquitin ligase complex (GO:0080008);;	K10263|0.0e+00|lcf:108874452|K10263 F-box and WD-40 domain protein 5 | (RefSeq) fbxw5; F-box/WD repeat-containing protein 5	--	--	WD domain, G-beta repeat;; F-box-like;; F-box domain	--	Uncharacterized protein OS=Lates calcarifer OX=8187 GN=fbxw5 PE=4 SV=1	S	Function unknown	PREDICTED: F-box/WD repeat-containing protein 5 [Lates calcarifer]
c103241.graph_c1	29	59	32	77	169	72	0.59	1.31	0.62	1.4	2.96	1.54	0.00555779	1.66125	up	--	--	Cellular Component: integral component of membrane (GO:0016021);; Biological Process: oxidation-reduction process (GO:0055114);;	K11318|6.2e-106|tng:GSTEN00007257G001|K11318 ataxin-7 | (RefSeq) unnamed protein product	--	--	Eukaryotic cytochrome b561	--	Cytochrome b561 domain-containing protein OS=Seriola dumerili OX=41447 PE=4 SV=1	C	Energy production and conversion	cytochrome b561 domain-containing protein 1 isoform X1 [Seriola dumerili]
c91717.graph_c0	43	81	46	172	291	98	1.85	3.8	1.89	6.58	10.78	4.43	0.000648182	1.93855	up	[I]	Lipid transport and metabolism	Molecular Function: transferase activity (GO:0016740);;	K00645|1.6e-179|sdu:111224921|K00645 [acyl-carrier-protein] S-malonyltransferase [EC:2.3.1.39] | (RefSeq) mcat; malonyl-CoA-acyl carrier protein transacylase, mitochondrial	[I]	Lipid transport and metabolism	Acyl transferase domain	--	[Acyl-carrier-protein] S-malonyltransferase OS=Seriola dumerili OX=41447 PE=4 SV=1	I	Lipid transport and metabolism	malonyl-CoA-acyl carrier protein transacylase, mitochondrial [Seriola dumerili]
c107471.graph_c1	274	2548	666	41	67	81	14.69	82.35	32.49	1.95	3.18	3.34	0.000253565	-3.19091	down	--	--	Cellular Component: membrane (GO:0016020);;	K18273|5.6e-110|lcm:106705642|K18273 alpha-tectorin | (RefSeq) alpha-tectorin-like	[WV]	--	MAM domain, meprin/A5/mu;; von Willebrand factor type D domain;; C8 domain;; TILa domain;; Trypsin Inhibitor like cysteine rich domain	Alpha-tectorin OS=Gallus gallus OX=9031 GN=TECTA PE=1 SV=1	Uncharacterized protein OS=Seriola lalandi dorsalis OX=1841481 PE=4 SV=1	--	--	zonadhesin-like isoform X2 [Seriola dumerili]
c98068.graph_c0	0	12	6	129	940	59	0	0.4	0.16	3.75	25.27	1.92	9.56e-07	5.21114	up	--	--	--	K08519|6.1e-102|sdu:111240329|K08519 syntaxin-binding protein 6 | (RefSeq) syntaxin-binding protein 6-like isoform X1	[U]	Intracellular trafficking, secretion, and vesicular transport	Exocyst complex component SEC3 N-terminal PIP2 binding PH	--	Sec3-PIP2_bind domain-containing protein OS=Lates calcarifer OX=8187 GN=LOC108901774 PE=4 SV=1	U	Intracellular trafficking, secretion, and vesicular transport	syntaxin-binding protein 6-like isoform X1 [Seriola dumerili]
c103368.graph_c0	44	335	419	21	46	19	0.54	4.32	5.54	0.21	1.38	0.23	0.00222243	-2.49108	down	--	--	Molecular Function: hydrolase activity (GO:0016787);; Biological Process: phosphatidylinositol dephosphorylation (GO:0046856);;	K15909|0.0e+00|sdu:111232670|K15909 phosphatidylinositol-3,4,5-trisphosphate 5-phosphatase 2 [EC:3.1.3.86] | (RefSeq) phosphatidylinositol 3,4,5-trisphosphate 5-phosphatase 2B-like isoform X1	[U]	Intracellular trafficking, secretion, and vesicular transport	SH2 domain;; Endonuclease/Exonuclease/phosphatase family;; SAM domain (Sterile alpha motif);; SAM domain (Sterile alpha motif)	Phosphatidylinositol 3,4,5-trisphosphate 5-phosphatase 2B OS=Danio rerio OX=7955 GN=inppl1b PE=2 SV=1	Phosphatidylinositol-3,4,5-trisphosphate 5-phosphatase OS=Seriola lalandi dorsalis OX=1841481 PE=3 SV=1	T	Signal transduction mechanisms	phosphatidylinositol 3,4,5-trisphosphate 5-phosphatase 2B-like [Seriola lalandi dorsalis]
c107577.graph_c0	197	253	283	510	757	455	2.14	3	2.93	4.89	7.02	5.19	0.00139658	1.53689	up	[EQ]	--	Molecular Function: hydrolase activity (GO:0016787);;	K01469|0.0e+00|lcf:108894453|K01469 5-oxoprolinase (ATP-hydrolysing) [EC:3.5.2.9] | (RefSeq) oplah; LOW QUALITY PROTEIN: 5-oxoprolinase	[E]	Amino acid transport and metabolism	Hydantoinase B/oxoprolinase;; Hydantoinase/oxoprolinase;; Hydantoinase/oxoprolinase N-terminal region	--	Uncharacterized protein OS=Seriola lalandi dorsalis OX=1841481 PE=3 SV=1	E	Amino acid transport and metabolism	5-oxoprolinase [Seriola lalandi dorsalis]
c99296.graph_c0	29	837	1128	27	74	10	0.85	28.72	33.15	0.81	1.96	0.31	0.00315991	-3.20255	down	[Q]	Secondary metabolites biosynthesis, transport and catabolism	Molecular Function: catalytic activity (GO:0003824);;	--	[R]	General function prediction only	AMP-binding enzyme	Disco-interacting protein 2 homolog B-A OS=Danio rerio OX=7955 GN=dip2ba PE=2 SV=1	DMAP_binding domain-containing protein OS=Lates calcarifer OX=8187 GN=DIP2C PE=3 SV=1	--	--	PREDICTED: disco-interacting protein 2 homolog C isoform X1 [Lates calcarifer]
c95057.graph_c0	131	112	132	495	1881	292	6.3	5.88	6.02	21.15	77.53	14.72	0.000520782	2.66818	up	--	--	Molecular Function: protein binding (GO:0005515);;	K10457|4.4e-38|bpec:110169122|K10457 kelch-like protein 20 | (RefSeq) kelch-like protein 20	--	--	Kelch motif;; Kelch motif;; Kelch motif;; Galactose oxidase, central domain;; Kelch motif;; Galactose oxidase, central domain	--	BTB domain-containing protein OS=Etheostoma spectabile OX=54343 GN=FQN60_003769 PE=4 SV=1	T	Signal transduction mechanisms	kelch-like protein 20 [Scophthalmus maximus]
c101750.graph_c0	76	181	175	405	1209	181	2.18	5.74	4.83	10.29	30.01	5.5	0.00188816	2.16742	up	--	--	Molecular Function: tRNA binding (GO:0000049);; Biological Process: tRNA wobble uridine modification (GO:0002098);; Cellular Component: cytoplasm (GO:0005737);; Molecular Function: nucleotidyltransferase activity (GO:0016779);; Biological Process: protein urmylation (GO:0032447);; Biological Process: tRNA thio-modification (GO:0034227);;	K14169|1.9e-237|sdu:111239213|K14169 cytoplasmic tRNA 2-thiolation protein 2 | (RefSeq) ctu2; cytoplasmic tRNA 2-thiolation protein 2	[S]	Function unknown	Cytoplasmic tRNA 2-thiolation protein 2	Cytoplasmic tRNA 2-thiolation protein 2 OS=Danio rerio OX=7955 GN=ctu2 PE=2 SV=2	Cytoplasmic tRNA 2-thiolation protein 2 OS=Seriola dumerili OX=41447 GN=CTU2 PE=3 SV=1	J	Translation, ribosomal structure and biogenesis	cytoplasmic tRNA 2-thiolation protein 2 [Seriola dumerili]
c98758.graph_c2	26	56	49	138	286	67	0.33	0.76	0.5	1.63	3.12	0.8	0.00035359	2.10596	up	--	--	Molecular Function: GTPase activity (GO:0003924);; Molecular Function: GTP binding (GO:0005525);;	K12491|0.0e+00|sdu:111230953|K12491 Arf-GAP with GTPase, ANK repeat and PH domain-containing protein 1/3/4/5/6/9/11 | (RefSeq) agap3; arf-GAP with GTPase, ANK repeat and PH domain-containing protein 3	[T]	Signal transduction mechanisms	Ras family;; PH domain;; Putative GTPase activating protein for Arf;; Ankyrin repeats (3 copies);; Ankyrin repeat;; Ankyrin repeats (many copies);; Ankyrin repeats (many copies);; Ankyrin repeat	Arf-GAP with GTPase, ANK repeat and PH domain-containing protein 1 OS=Xenopus laevis OX=8355 GN=agap1 PE=2 SV=1	AGAP3 (Fragment) OS=Poeciliopsis prolifica OX=188132 GN=AGAP3 PE=4 SV=1	T	Signal transduction mechanisms	PREDICTED: arf-GAP with GTPase, ANK repeat and PH domain-containing protein 3 isoform X2 [Stegastes partitus]
c106684.graph_c0	848	24472	34762	599	1538	407	4.55	379.18	483.28	2.86	7	2.28	0.000548815	-3.53332	down	--	--	Biological Process: reproduction (GO:0000003);; Cellular Component: nuclear chromosome (GO:0000228);; Biological Process: nuclear division (GO:0000280);; Biological Process: meiotic DNA repair synthesis (GO:0000711);; Biological Process: DNA synthesis involved in DNA repair (GO:0000731);; Cellular Component: condensed chromosome (GO:0000793);; Cellular Component: condensed nuclear chromosome (GO:…	K19533|1.7e-294|lcf:108873602|K19533 synaptonemal complex protein 1 | (RefSeq) LOW QUALITY PROTEIN: synaptonemal complex protein 1-like	[O]	Posttranslational modification, protein turnover, chaperones	Synaptonemal complex protein 1 (SCP-1);; Ubiquitin-conjugating enzyme	SUMO-conjugating enzyme UBC9 OS=Gallus gallus OX=9031 GN=UBE2I PE=1 SV=1	Uncharacterized protein OS=Perca fluviatilis OX=8168 GN=PFLUV_G00047680 PE=4 SV=1	S	Function unknown	synaptonemal complex protein 1-like [Seriola dumerili]
c89859.graph_c0	106	202	139	354	635	200	5.38	11.17	6.73	15.99	27.78	10.67	0.00176338	1.64769	up	[J]	Translation, ribosomal structure and biogenesis	Molecular Function: methyltransferase activity (GO:0008168);;	K14568|5.8e-133|sdu:111230097|K14568 rRNA small subunit pseudouridine methyltransferase Nep1 [EC:2.1.1.260] | (RefSeq) emg1; ribosomal RNA small subunit methyltransferase NEP1	[J]	Translation, ribosomal structure and biogenesis	EMG1/NEP1 methyltransferase	--	Uncharacterized protein OS=Seriola dumerili OX=41447 PE=3 SV=1	J	Translation, ribosomal structure and biogenesis	ribosomal RNA small subunit methyltransferase NEP1 [Perca flavescens]
c103303.graph_c2	120	526	480	976	1411	774	4.72	20.52	16.7	29.13	40.86	28.34	0.000666905	1.93562	up	--	--	Molecular Function: RNA binding (GO:0003723);;	K17265|1.7e-218|sdu:111232702|K17265 Ras GTPase-activating protein-binding protein 1 [EC:3.6.4.12 3.6.4.13] | (RefSeq) g3bp1; ras GTPase-activating protein-binding protein 1 isoform X1	[T]	Signal transduction mechanisms	Nuclear transport factor 2 (NTF2) domain;; RNA recognition motif. (a.k.a. RRM, RBD, or RNP domain)	Heterogeneous nuclear ribonucleoprotein A2 homolog 2 OS=Xenopus laevis OX=8355 PE=2 SV=1	Uncharacterized protein OS=Etheostoma spectabile OX=54343 GN=FQN60_009907 PE=4 SV=1	A	RNA processing and modification	hypothetical protein FQN60_009907 [Etheostoma spectabile]
c105639.graph_c0	20	661	557	11	21	13	0.54	16.88	12.55	0.35	0.37	0.39	0.000339456	-3.61143	down	--	--	Biological Process: regulation of apoptotic process (GO:0042981);;	K20913|5.0e-129|mdo:100030808|K20913 caspase recruitment domain-containing protein 14 | (RefSeq) CARD14; caspase recruitment domain family member 14	[F]	Nucleotide transport and metabolism	Guanylate kinase	--	Uncharacterized protein OS=Seriola lalandi dorsalis OX=1841481 PE=4 SV=1	F	Nucleotide transport and metabolism	caspase recruitment domain-containing protein 14 isoform X1 [Seriola dumerili]
c100909.graph_c0	2	33	13	1013	2470	291	0.04	0.9	0.27	23.27	58.74	8.32	1.84e-12	5.96508	up	--	--	Biological Process: cell morphogenesis (GO:0000902);; Biological Process: cell morphogenesis involved in differentiation (GO:0000904);; Biological Process: regulation of cell growth (GO:0001558);; Molecular Function: molecular_function (GO:0003674);; Molecular Function: binding (GO:0005488);; Molecular Function: protein binding (GO:0005515);; Cellular Component: cellular_component (GO:0005575);; …	K20493|0.0e+00|sdu:111223807|K20493 leucine-rich repeat-containing protein 16 | (RefSeq) capping protein, Arp2/3 and myosin-I linker protein 3-like	[N]	Cell motility	CARMIL C-terminus;; Leucine Rich repeat	--	Uncharacterized protein OS=Seriola dumerili OX=41447 PE=4 SV=1	N	Cell motility	capping protein, Arp2/3 and myosin-I linker protein 3-like isoform X1 [Seriola lalandi dorsalis]
c97180.graph_c1	292	676	882	147	232	132	8.54	24.11	22.29	5.35	7.91	5.7	0.00642943	-1.36608	down	--	--	Biological Process: reproduction (GO:0000003);; Molecular Function: DNA-binding transcription factor activity, RNA polymerase II-specific (GO:0000981);; Biological Process: system process (GO:0003008);; Molecular Function: molecular_function (GO:0003674);; Molecular Function: DNA-binding transcription factor activity (GO:0003700);; Cellular Component: cellular_component (GO:0005575);; Cellular Co…	K09409|0.0e+00|lcf:108887388|K09409 forkhead box protein P2/4 | (RefSeq) foxp2; forkhead box protein P2 isoform X1	[K]	Transcription	FOXP coiled-coil domain;; Forkhead domain	Forkhead box protein P2 OS=Xenopus laevis OX=8355 GN=foxp2 PE=2 SV=1	Fork-head domain-containing protein OS=Echeneis naucrates OX=173247 GN=foxp2 PE=4 SV=1	K	Transcription	forkhead box protein P2 isoform X1 [Seriola lalandi dorsalis]
c79224.graph_c1	1	72	101	724	1985	261	0.02	1.41	1.71	11.46	30.42	4.92	0.000558779	3.81758	up	--	--	Biological Process: lipid transport (GO:0006869);;	K20463|0.0e+00|sdu:111236264|K20463 oxysterol-binding protein-related protein 3/6/7 | (RefSeq) oxysterol-binding protein-related protein 7-like isoform X1	[I]	Lipid transport and metabolism	Oxysterol-binding protein;; Pleckstrin homology domain;; PH domain	Oxysterol-binding protein-related protein 9 OS=Xenopus tropicalis OX=8364 GN=osbpl9 PE=2 SV=1	Oxysterol-binding protein OS=Seriola dumerili OX=41447 PE=3 SV=1	T	Signal transduction mechanisms	oxysterol-binding protein-related protein 7-like isoform X1 [Seriola dumerili]
c103151.graph_c0	80	256	354	555	975	265	4.15	10.16	13.65	16.47	25.98	9.03	0.00930385	1.70165	up	--	--	Molecular Function: RNA binding (GO:0003723);; Molecular Function: ribonuclease P activity (GO:0004526);; Cellular Component: nucleolus (GO:0005730);; Biological Process: tRNA processing (GO:0008033);; Cellular Component: ribonuclease P complex (GO:0030677);;	K03538|3.6e-97|lcf:108880512|K03538 ribonuclease P protein subunit POP4 [EC:3.1.26.5] | (RefSeq) pop4; ribonuclease P protein subunit p29 isoform X1	[A]	RNA processing and modification	Domain of unknown function UPF0086	--	POP4 domain-containing protein OS=Lates calcarifer OX=8187 GN=pop4 PE=4 SV=1	A	RNA processing and modification	PREDICTED: ribonuclease P protein subunit p29 isoform X1 [Lates calcarifer]
c99546.graph_c0	58	123	89	188	432	100	3.94	5.68	3	9.06	19.37	6.8	0.00846449	1.61047	up	--	--	Cellular Component: cellular_component (GO:0005575);; Cellular Component: intracellular (GO:0005622);; Cellular Component: obsolete cell (GO:0005623);; Cellular Component: nucleus (GO:0005634);; Cellular Component: cytoplasm (GO:0005737);; Cellular Component: cytosol (GO:0005829);; Biological Process: regulation of mitotic cell cycle (GO:0007346);; Biological Process: biological_process (GO:00081…	K01068|3.5e-32|pki:111861013|K01068 acyl-coenzyme A thioesterase 1/2/4 [EC:3.1.2.2] | (RefSeq) cell death regulator Aven-like isoform X1	--	--	--	--	Uncharacterized protein OS=Seriola lalandi dorsalis OX=1841481 PE=4 SV=1	S	Function unknown	cell death regulator Aven [Seriola dumerili]
c91824.graph_c0	47	86	61	203	340	68	1.14	2.26	1.4	4.37	7.05	1.73	0.00686456	1.80825	up	--	--	Cellular Component: cellular_component (GO:0005575);; Cellular Component: intracellular (GO:0005622);; Cellular Component: obsolete cell (GO:0005623);; Cellular Component: nucleus (GO:0005634);; Biological Process: regulation of transcription, DNA-templated (GO:0006355);; Biological Process: multicellular organism development (GO:0007275);; Biological Process: open tracheal system development (GO…	K22870|6.2e-240|sdu:111225161|K22870 zinc finger protein 423 | (RefSeq) znf423; zinc finger protein 423	[R]	General function prediction only	C2H2-type zinc finger;; Zinc finger, C2H2 type;; Zinc-finger double domain;; C2H2-type zinc finger;; Drought induced 19 protein (Di19), zinc-binding	Zinc finger protein 423 OS=Danio rerio OX=7955 GN=znf423 PE=2 SV=1	Uncharacterized protein OS=Seriola lalandi dorsalis OX=1841481 GN=ZNF423 PE=4 SV=1	K	Transcription	zinc finger protein 423 [Echeneis naucrates]
c100465.graph_c2	139	1326	1579	86	165	73	8.3	86.34	90.05	4.58	8.51	4.58	0.00281722	-2.47518	down	--	--	Molecular Function: actin binding (GO:0003779);; Cellular Component: cytoskeleton (GO:0005856);;	K05762|9.1e-82|lcf:108892900|K05762 radixin | (RefSeq) radixin-like	[R]	General function prediction only	Ezrin/radixin/moesin family	Radixin OS=Gallus gallus OX=9031 GN=RDX PE=2 SV=1	Radixin OS=Gasterosteus aculeatus OX=69293 GN=RDX PE=4 SV=1	S	Function unknown	radixin-like isoform X2 [Echeneis naucrates]
c96429.graph_c0	65	173	80	457	1430	145	2.39	6.95	2.83	14.91	45.18	5.6	0.00120773	2.6359	up	--	--	Molecular Function: iron ion binding (GO:0005506);; Molecular Function: oxidoreductase activity, acting on paired donors, with incorporation or reduction of molecular oxygen (GO:0016705);; Molecular Function: L-ascorbic acid binding (GO:0031418);;	K09592|5.4e-94|ocu:100354210|K09592 hypoxia-inducible factor prolyl hydroxylase [EC:1.14.11.29] | (RefSeq) EGLN3; egl-9 family hypoxia inducible factor 3	[T]	Signal transduction mechanisms	2OG-Fe(II) oxygenase superfamily;; 2OG-Fe(II) oxygenase superfamily;; 2OG-Fe(II) oxygenase superfamily	--	Fe2OG dioxygenase domain-containing protein OS=Seriola dumerili OX=41447 PE=4 SV=1	T	Signal transduction mechanisms	egl nine homolog 3 [Seriola dumerili]
c93994.graph_c0	267	453	536	1052	1984	704	12.98	23.98	24.85	45.49	83.1	35.94	3.18e-05	1.84973	up	--	--	Biological Process: pseudouridine synthesis (GO:0001522);; Molecular Function: RNA binding (GO:0003723);; Cellular Component: nucleolus (GO:0005730);; Biological Process: rRNA processing (GO:0006364);;	K11128|2.2e-66|sdu:111232379|K11128 H/ACA ribonucleoprotein complex subunit 1 | (RefSeq) gar1; H/ACA ribonucleoprotein complex subunit 1	[J]	Translation, ribosomal structure and biogenesis	Gar1/Naf1 RNA binding region	H/ACA ribonucleoprotein complex subunit 1 OS=Danio rerio OX=7955 GN=gar1 PE=2 SV=1	H/ACA ribonucleoprotein complex subunit OS=Acanthochromis polyacanthus OX=80966 PE=3 SV=1	J	Translation, ribosomal structure and biogenesis	H/ACA ribonucleoprotein complex subunit 1 [Acanthochromis polyacanthus]
c106862.graph_c0	74	576	863	70	80	37	5.53	48.29	63.77	4.7	5.18	2.88	0.00818278	-2.25218	down	--	--	Molecular Function: metal ion binding (GO:0046872);;	K04679|9.5e-48|sdu:111217815|K04679 MAD, mothers against decapentaplegic interacting protein | (RefSeq) zinc finger FYVE domain-containing protein 16-like isoform X1	[V]	Defense mechanisms	--	--	FYVE-type domain-containing protein OS=Seriola dumerili OX=41447 PE=4 SV=1	V	Defense mechanisms	zinc finger FYVE domain-containing protein 16-like isoform X2 [Seriola dumerili]
c104329.graph_c0	18	18	39	142	587	25	0.26	0.34	0.59	2.28	7.57	0.43	0.00261056	2.99284	up	[T]	Signal transduction mechanisms	Molecular Function: voltage-gated potassium channel activity (GO:0005249);; Cellular Component: voltage-gated potassium channel complex (GO:0008076);; Biological Process: regulation of ion transmembrane transport (GO:0034765);; Biological Process: protein homooligomerization (GO:0051260);;	K04901|6.7e-292|sdu:111233171|K04901 potassium voltage-gated channel subfamily G member 2 | (RefSeq) potassium voltage-gated channel subfamily G member 2-like	[P]	Inorganic ion transport and metabolism	Ion transport protein;; BTB/POZ domain;; Ion channel	Potassium voltage-gated channel subfamily G member 2 OS=Gallus gallus OX=9031 GN=KCNG2 PE=2 SV=1	Uncharacterized protein OS=Seriola dumerili OX=41447 PE=4 SV=1	P	Inorganic ion transport and metabolism	potassium voltage-gated channel subfamily G member 2-like [Seriola dumerili]
c106252.graph_c1	311	1189	1055	94	163	81	14.86	62.47	48.3	4.02	6.76	4.04	6.23e-06	-2.35934	down	--	--	Biological Process: regulation of Rho guanyl-nucleotide exchange factor activity (GO:2001106);;	K06530|1.6e-64|sdu:111237318|K06530 CD109 antigen | (RefSeq) CD109 antigen-like	[O]	Posttranslational modification, protein turnover, chaperones	A-macroglobulin receptor binding domain	Cell cycle progression protein 1 OS=Gallus gallus OX=9031 GN=CCPG1 PE=2 SV=1	Uncharacterized protein OS=Seriola dumerili OX=41447 PE=4 SV=1	S	Function unknown	cell cycle progression protein 1 isoform X4 [Seriola dumerili]
c104033.graph_c0	6	42	91	31702	107528	11586	0.13	1.2	2.28	677.72	2323.63	307.28	7.14e-29	9.22736	up	--	--	--	--	--	--	Zona pellucida-like domain	--	Uncharacterized protein OS=Larimichthys crocea OX=215358 GN=D5F01_LYC22693 PE=4 SV=1	S	Function unknown	uncharacterized protein LOC111665736 [Seriola lalandi dorsalis]
c86737.graph_c0	5	15	20	1503	4225	569	0.1	0.32	0.38	26.3	71.54	11.82	1.07e-24	7.01729	up	--	--	Molecular Function: ubiquitin-protein transferase activity (GO:0004842);;	K22371|0.0e+00|lcf:108879587|K22371 G2/M phase-specific E3 ubiquitin-protein ligase [EC:2.3.2.26] | (RefSeq) uncharacterized protein LOC108879587	--	--	HECT-domain (ubiquitin-transferase)	--	HECT domain-containing protein OS=Seriola dumerili OX=41447 PE=4 SV=1	K	Transcription	uncharacterized protein LOC111671705 [Seriola lalandi dorsalis]
c107466.graph_c1	191	861	825	120	178	104	4.81	22.81	17.19	2.67	2.94	2.56	0.00879901	-1.6243	down	--	--	Cellular Component: integral component of membrane (GO:0016021);;	K05131|3.8e-130|sdu:111228083|K05131 interferon receptor 2 | (RefSeq) uncharacterized protein LOC111228083 isoform X1	[R]	General function prediction only	Tissue factor;; Interferon-alpha/beta receptor, fibronectin type III	--	Uncharacterized protein OS=Seriola lalandi dorsalis OX=1841481 PE=4 SV=1	S	Function unknown	uncharacterized protein LOC111663409 [Seriola lalandi dorsalis]
c101952.graph_c0	201	232	249	704	1255	363	3.97	4.98	4.68	12.29	21.21	7.52	0.000796039	1.90682	up	--	--	Cellular Component: integral component of membrane (GO:0016021);;	K09171|2.4e-12|amex:103025737|K09171 nuclear factor I/X | (RefSeq) nuclear factor 1 X-type isoform X1	[S]	Function unknown	Protein of unknown function (DUF3808);; Tetratricopeptide repeat;; Tetratricopeptide repeat;; Tetratricopeptide repeat;; Tetratricopeptide repeat;; Tetratricopeptide repeat;; Growth arrest and DNA-damage-inducible proteins-interacting protein 1	Tetratricopeptide repeat protein 39A OS=Danio rerio OX=7955 GN=ttc39a PE=2 SV=1	Uncharacterized protein OS=Seriola dumerili OX=41447 PE=3 SV=1	S	Function unknown	tetratricopeptide repeat protein 39A-like isoform X3 [Seriola dumerili]
c104989.graph_c0	698	1117	829	108	142	106	12.7	20.65	13.44	1.94	2.07	1.73	6.5e-07	-2.43565	down	--	--	Biological Process: glomerular filtration (GO:0003094);; Molecular Function: calcium ion binding (GO:0005509);;	K19951|0.0e+00|sdu:111234363|K19951 TBC1 domain family member 8/9 | (RefSeq) tbc1d8b; TBC1 domain family member 8B isoform X1	[R]	General function prediction only	Rab-GTPase-TBC domain;; GRAM domain	TBC1 domain family member 8B OS=Danio rerio OX=7955 GN=tbc1d8b PE=1 SV=1	Uncharacterized protein OS=Seriola dumerili OX=41447 PE=4 SV=1	S	Function unknown	TBC1 domain family member 8B isoform X2 [Seriola dumerili]
c106931.graph_c0	323	659	675	27	83	78	7.11	11.39	9.61	0.5	1.51	2.15	0.000265752	-2.50868	down	--	--	Cellular Component: plasma membrane (GO:0005886);; Biological Process: cell adhesion (GO:0007155);; Biological Process: axon guidance (GO:0007411);; Cellular Component: integral component of membrane (GO:0016021);;	K06535|4.1e-18|otw:112252231|K06535 basigin | (RefSeq) basigin-like isoform X1	--	--	Immunoglobulin domain;; Immunoglobulin domain;; Immunoglobulin I-set domain;; Immunoglobulin domain;; Immunoglobulin V-set domain	Basigin OS=Gallus gallus OX=9031 GN=BSG PE=1 SV=2	Uncharacterized protein OS=Seriola dumerili OX=41447 PE=4 SV=1	T	Signal transduction mechanisms	embigin [Seriola dumerili]
c101894.graph_c1	0	116	133	964	2717	291	0	2.93	2.94	19.68	53.67	7.06	0.00669607	3.4847	up	--	--	Biological Process: ovarian follicle development (GO:0001541);; Biological Process: oocyte maturation (GO:0001556);; Cellular Component: extracellular space (GO:0005615);; Molecular Function: growth factor activity (GO:0008083);; Biological Process: granulosa cell development (GO:0060016);; Biological Process: negative regulation of oocyte development (GO:0060283);;	K05498|4.5e-180|sdu:111233456|K05498 bone morphogenetic protein 15 | (RefSeq) bmp15; bone morphogenetic protein 15	[T]	Signal transduction mechanisms	Transforming growth factor beta like domain	Bone morphogenetic protein 7 OS=Xenopus laevis OX=8355 GN=bmp7 PE=1 SV=1	TGF_BETA_2 domain-containing protein OS=Seriola dumerili OX=41447 PE=3 SV=1	T	Signal transduction mechanisms	bone morphogenetic protein 15 [Seriola lalandi dorsalis]
c105541.graph_c0	51	3122	4783	13	13	4	0.6	45.54	54.72	0.15	0.45	0.05	5.08e-09	-6.14274	down	--	--	Molecular Function: RNA polymerase II cis-regulatory region sequence-specific DNA binding (GO:0000978);; Molecular Function: DNA-binding transcription activator activity, RNA polymerase II-specific (GO:0001228);; Biological Process: epithelial to mesenchymal transition (GO:0001837);;	K21404|0.0e+00|lcf:108883556|K21404 AT-hook-containing transcription factor | (RefSeq) AT-hook-containing transcription factor-like	--	--	--	--	Uncharacterized protein OS=Seriola dumerili OX=41447 PE=4 SV=1	S	Function unknown	PREDICTED: AT-hook-containing transcription factor-like [Lates calcarifer]
c101821.graph_c1	40	5402	6535	76	69	94	0.8	62.88	65.3	0.62	0.65	0.91	0.000727483	-3.966	down	--	--	Molecular Function: microtubule motor activity (GO:0003777);; Molecular Function: ATP binding (GO:0005524);; Biological Process: microtubule-based movement (GO:0007018);; Cellular Component: dynein complex (GO:0030286);;	K10408|0.0e+00|sdu:111231310|K10408 dynein heavy chain, axonemal | (RefSeq) dnah2; dynein heavy chain 2, axonemal	[Z]	Cytoskeleton	Dynein heavy chain C-terminal domain;; ATP-binding dynein motor region;; Dynein heavy chain AAA lid domain;; Microtubule-binding stalk of dynein motor;; Dynein heavy chain region D6 P-loop domain;; Myosin tail	--	Dynein, axonemal, heavy chain 2 OS=Lates calcarifer OX=8187 PE=3 SV=1	Z	Cytoskeleton	dynein heavy chain 2, axonemal [Seriola dumerili]
c104294.graph_c0	72	173	100	30	21	16	1.27	3.77	1.34	0.38	0.25	0.24	0.00580759	-1.82006	down	--	--	Molecular Function: molecular_function (GO:0003674);; Molecular Function: GTPase activator activity (GO:0005096);; Cellular Component: cellular_component (GO:0005575);; Cellular Component: intracellular (GO:0005622);; Cellular Component: obsolete cell (GO:0005623);; Cellular Component: nucleus (GO:0005634);; Cellular Component: nucleoplasm (GO:0005654);; Cellular Component: cytoplasm (GO:0005737)…	K20653|0.0e+00|sdu:111227013|K20653 GEM interacting protein | (RefSeq) gmip; GEM-interacting protein isoform X1	[T]	Signal transduction mechanisms	RhoGAP domain	Rho GTPase-activating protein 29 OS=Danio rerio OX=7955 GN=arhgap29 PE=2 SV=1	Uncharacterized protein OS=Echeneis naucrates OX=173247 GN=gmip PE=4 SV=1	T	Signal transduction mechanisms	GEM-interacting protein [Seriola lalandi dorsalis]
c92702.graph_c0	103	228	289	588	1719	252	2.45	5.9	6.57	12.4	35.08	6.3	0.00241748	2.16113	up	--	--	Biological Process: formation of primary germ layer (GO:0001704);; Biological Process: mesoderm formation (GO:0001707);; Biological Process: cell fate specification (GO:0001708);; Biological Process: mesodermal cell fate commitment (GO:0001710);; Cellular Component: cellular_component (GO:0005575);; Cellular Component: obsolete cell (GO:0005623);; Cellular Component: plasma membrane (GO:0005886);…	K23096|1.5e-241|lco:104920653|K23096 repulsive guidance molecule A | (RefSeq) RGM domain family member B	--	--	Repulsive guidance molecule (RGM) N-terminus;; Repulsive guidance molecule (RGM) C-terminus	Repulsive guidance molecule A OS=Gallus gallus OX=9031 GN=RGMA PE=1 SV=1	Uncharacterized protein OS=Mastacembelus armatus OX=205130 PE=3 SV=1	S	Function unknown	RGM domain family, member D [Epinephelus lanceolatus]
c97393.graph_c0	84	1166	989	41	53	42	2.9	46.48	33.65	1.27	1.49	1.68	0.000346774	-3.07927	down	--	--	Biological Process: reproduction (GO:0000003);; Biological Process: microtubule cytoskeleton organization (GO:0000226);; Biological Process: epithelial cell development (GO:0002064);; Biological Process: columnar/cuboidal epithelial cell differentiation (GO:0002065);; Biological Process: columnar/cuboidal epithelial cell development (GO:0002066);; Biological Process: developmental process involve…	K23334|3.6e-238|sdu:111225179|K23334 Ran-binding protein 9/10 | (RefSeq) ranbp10; ran-binding protein 10 isoform X1	[R]	General function prediction only	CTLH/CRA C-terminal to LisH motif domain;; SPRY domain;; LisH	Ran-binding protein 10 OS=Danio rerio OX=7955 GN=ranbp10 PE=3 SV=1	Uncharacterized protein OS=Seriola dumerili OX=41447 PE=3 SV=1	S	Function unknown	ran-binding protein 10 isoform X1 [Seriola dumerili]
c91452.graph_c0	51	114	132	439	1002	231	2.39	5.85	5.9	18.29	40.43	11.37	1.47e-06	2.6865	up	[J]	Translation, ribosomal structure and biogenesis	Cellular Component: nuclear exosome (RNase complex) (GO:0000176);; Cellular Component: cytoplasmic exosome (RNase complex) (GO:0000177);; Cellular Component: exosome (RNase complex) (GO:0000178);; Biological Process: nuclear-transcribed mRNA catabolic process, deadenylation-dependent decay (GO:0000288);; Biological Process: nuclear-transcribed mRNA catabolic process, exonucleolytic (GO:0000291);;…	K12587|2.7e-144|sdu:111225229|K12587 exosome complex component MTR3 | (RefSeq) exosc6; exosome complex component MTR3	[J]	Translation, ribosomal structure and biogenesis	3' exoribonuclease family, domain 1	Exosome complex component MTR3 OS=Danio rerio OX=7955 GN=exosc6 PE=2 SV=2	RNase_PH domain-containing protein OS=Echeneis naucrates OX=173247 GN=exosc6 PE=4 SV=1	J	Translation, ribosomal structure and biogenesis	exosome complex component MTR3 [Anarrhichthys ocellatus]
c103891.graph_c0	2	28	38	98	417	44	0.03	0.48	0.57	1.36	5.6	0.72	0.00323725	2.97571	up	[IQ]	--	Molecular Function: catalytic activity (GO:0003824);;	K08749|0.0e+00|sdu:111221152|K08749 solute carrier family 27 (fatty acid transporter), member 6 | (RefSeq) very long-chain acyl-CoA synthetase-like	[I]	Lipid transport and metabolism	AMP-binding enzyme;; AMP-binding enzyme C-terminal domain	--	Uncharacterized protein OS=Seriola dumerili OX=41447 PE=3 SV=1	I	Lipid transport and metabolism	very long-chain acyl-CoA synthetase-like [Seriola dumerili]
c107906.graph_c1	185	2192	2533	138	266	149	2.56	37.33	34.89	1.13	2.42	1.44	0.00823593	-2.33546	down	--	--	Biological Process: reproduction (GO:0000003);; Biological Process: microtubule cytoskeleton organization (GO:0000226);; Molecular Function: 1-phosphatidylinositol-3-phosphate 5-kinase activity (GO:0000285);; Biological Process: ameboidal-type cell migration (GO:0001667);; Cellular Component: ruffle (GO:0001726);; Biological Process: regulation of protein phosphorylation (GO:0001932);; Biological…	K00889|7.2e-301|sdu:111223078|K00889 1-phosphatidylinositol-4-phosphate 5-kinase [EC:2.7.1.68] | (RefSeq) phosphatidylinositol 4-phosphate 5-kinase type-1 alpha-like	[T]	Signal transduction mechanisms	Phosphatidylinositol-4-phosphate 5-Kinase	Phosphatidylinositol 4-phosphate 5-kinase type-1 beta OS=Gallus gallus OX=9031 GN=PIP5K1B PE=2 SV=1	Uncharacterized protein OS=Seriola dumerili OX=41447 PE=3 SV=1	T	Signal transduction mechanisms	phosphatidylinositol 4-phosphate 5-kinase type-1 alpha-like [Seriola dumerili]
c88527.graph_c0	36	63	59	1483	4889	650	1.55	2.95	2.42	56.61	180.74	29.33	2.56e-16	5.29251	up	--	--	Molecular Function: motor activity (GO:0003774);; Cellular Component: nucleus (GO:0005634);; Cellular Component: microtubule (GO:0005874);; Biological Process: microtubule-based process (GO:0007017);; Cellular Component: dynein complex (GO:0030286);; Cellular Component: P granule (GO:0043186);;	K10418|5.8e-44|kmr:108236914|K10418 dynein light chain LC8-type | (RefSeq) dynein light chain 2, cytoplasmic-like	[Z]	Cytoskeleton	Dynein light chain type 1	--	Dynein light chain OS=Amphiprion ocellaris OX=80972 PE=3 SV=1	Z	Cytoskeleton	hypothetical protein PFLUV_G00191920 [Perca fluviatilis]
c89453.graph_c0	202	277	507	63	94	40	7.19	10.7	17.13	1.98	2.88	1.49	0.000594852	-1.89649	down	--	--	Molecular Function: GTPase regulator activity (GO:0030695);;	K15839|2.0e-06|oro:101382753|K15839 G-protein signaling modulator 1 | (RefSeq) GPSM1; G-protein-signaling modulator 1 isoform X1	--	--	GoLoco motif	--	Uncharacterized protein OS=Perca fluviatilis OX=8168 GN=PFLUV_G00077850 PE=4 SV=1	S	Function unknown	G-protein-signaling modulator 1-like [Mastacembelus armatus]
c98688.graph_c0	28	738	600	3	1	12	1.17	31.64	22.49	0.11	0.04	0.53	0.000146077	-4.40978	down	--	--	--	--	--	--	--	--	--	--	--	PREDICTED: uncharacterized protein LOC109517647 [Hippocampus comes]
c96776.graph_c0	40	404	492	31	41	12	2.27	24.9	26.57	1.56	2	0.71	0.00234654	-2.68759	down	--	--	Molecular Function: molecular_function (GO:0003674);; Molecular Function: structural molecule activity (GO:0005198);; Molecular Function: binding (GO:0005488);; Molecular Function: protein binding (GO:0005515);; Cellular Component: cellular_component (GO:0005575);; Cellular Component: intracellular (GO:0005622);; Cellular Component: obsolete cell (GO:0005623);; Cellular Component: nucleus (GO:000…	K16527|4.5e-100|sdu:111218601|K16527 A-kinase anchor protein 11 | (RefSeq) akap11; A-kinase anchor protein 11 isoform X1	--	--	--	--	Uncharacterized protein OS=Seriola lalandi dorsalis OX=1841481 PE=4 SV=1	S	Function unknown	A-kinase anchor protein 11 [Seriola lalandi dorsalis]
c102909.graph_c2	177	802	583	86	62	35	4.34	21.51	13.22	1.65	1.43	0.98	0.000258675	-2.42288	down	[G]	Carbohydrate transport and metabolism	Cellular Component: integral component of membrane (GO:0016021);; Molecular Function: transmembrane transporter activity (GO:0022857);;	K08183|6.3e-166|xco:114135422|K08183 MFS transporter, MCT family, solute carrier family 16 (monocarboxylic acid transporters), member 6 | (RefSeq) monocarboxylate transporter 13-like	[G]	Carbohydrate transport and metabolism	Major Facilitator Superfamily	Monocarboxylate transporter 3 OS=Gallus gallus OX=9031 GN=SLC16A3 PE=2 SV=2	MFS domain-containing protein OS=Seriola dumerili OX=41447 PE=4 SV=1	G	Carbohydrate transport and metabolism	monocarboxylate transporter 2-like [Seriola dumerili]
c100658.graph_c0	459	377	433	1326	1663	752	16.63	14.86	14.95	42.64	51.76	28.6	0.00818278	1.69601	up	--	--	Cellular Component: mitochondrial matrix (GO:0005759);;	K15414|9.2e-150|sdu:111222334|K15414 complement component 1 Q subcomponent-binding protein, mitochondrial | (RefSeq) c1qbp; complement component 1 Q subcomponent-binding protein, mitochondrial	[V]	Defense mechanisms	Mitochondrial glycoprotein	--	Complement component 1 Q subcomponent-binding protein, mitochondrial OS=Seriola lalandi dorsalis OX=1841481 PE=3 SV=1	V	Defense mechanisms	complement component 1 Q subcomponent-binding protein, mitochondrial [Seriola dumerili]
c93336.graph_c0	0	0	0	53	448	28	0	0	0	1.19	9.87	0.8	1.3e-09	7.12383	up	--	--	Biological Process: signal transduction (GO:0007165);;	K20642|3.0e-308|sdu:111217004|K20642 Rho GTPase-activating protein 22/24/25 | (RefSeq) rho GTPase-activating protein 24-like	[T]	Signal transduction mechanisms	--	Unconventional myosin-IXAb OS=Danio rerio OX=7955 GN=myo9ab PE=3 SV=3	Rho-GAP domain-containing protein OS=Lates calcarifer OX=8187 PE=4 SV=1	T	Signal transduction mechanisms	rho GTPase-activating protein 24-like [Seriola lalandi dorsalis]
c97363.graph_c2	304	668	771	1671	3180	948	4.91	11.99	11.98	24.34	44.87	16.37	3.96e-05	2.01643	up	[R]	General function prediction only	Molecular Function: ATP binding (GO:0005524);; Molecular Function: ATPase activity (GO:0016887);;	K06158|0.0e+00|sdu:111216833|K06158 ATP-binding cassette, subfamily F, member 3 | (RefSeq) abcf3; ATP-binding cassette sub-family F member 3	[EJ]	--	ABC transporter;; ABC transporter;; AAA domain, putative AbiEii toxin, Type IV TA system;; RecF/RecN/SMC N terminal domain;; AAA domain;; ATPase family associated with various cellular activities (AAA)	Cystic fibrosis transmembrane conductance regulator OS=Xenopus laevis OX=8355 GN=cftr PE=2 SV=1	Uncharacterized protein OS=Lates calcarifer OX=8187 GN=LOC108902916 PE=4 SV=1	--	--	ATP-binding cassette sub-family F member 3 [Seriola dumerili]
c104733.graph_c0	9	12531	11786	24	216	15	0.15	175.02	146.41	0.27	6.26	0.38	0.00076569	-4.51173	down	--	--	Biological Process: cilium or flagellum-dependent cell motility (GO:0001539);; Biological Process: cilium movement (GO:0003341);; Molecular Function: molecular_function (GO:0003674);; Molecular Function: motor activity (GO:0003774);; Molecular Function: microtubule motor activity (GO:0003777);; Molecular Function: catalytic activity (GO:0003824);; Molecular Function: binding (GO:0005488);; Molecu…	K10408|2.3e-166|salp:111968159|K10408 dynein heavy chain, axonemal | (RefSeq) LOW QUALITY PROTEIN: dynein heavy chain 17, axonemal-like	[Z]	Cytoskeleton	Dynein heavy chain, N-terminal region 1	--	DHC_N1 domain-containing protein OS=Perca flavescens OX=8167 GN=EPR50_G00133070 PE=4 SV=1	Z	Cytoskeleton	PREDICTED: dynein heavy chain 17, axonemal-like isoform X1 [Lates calcarifer]
c97534.graph_c0	6	8	6	55	111	25	0.38	0.56	0.37	3.13	6.13	1.68	6.85e-06	3.24998	up	[J]	Translation, ribosomal structure and biogenesis	Biological Process: rRNA modification (GO:0000154);; Biological Process: rRNA 2'-O-methylation (GO:0000451);; Biological Process: enzyme-directed rRNA 2'-O-methylation (GO:0000453);; Biological Process: RNA methylation (GO:0001510);; Molecular Function: molecular_function (GO:0003674);; Molecular Function: RNA binding (GO:0003723);; Molecular Function: catalytic activity (GO:0003824);; Cellular C…	K15507|3.5e-27|lco:104933432|K15507 21S rRNA (GM2251-2'-O)-methyltransferase [EC:2.1.1.-] | (RefSeq) mrm1; rRNA methyltransferase 1, mitochondrial	[A]	RNA processing and modification	SpoU rRNA Methylase family	--	rRNA methyltransferase 1, mitochondrial OS=Larimichthys crocea OX=215358 GN=D5F01_LYC17238 PE=4 SV=1	A	RNA processing and modification	rRNA methyltransferase 1, mitochondrial [Larimichthys crocea]
c104571.graph_c0	504	683	715	143	202	132	9.92	16.36	16.59	2.38	3.67	2.76	0.000995783	-1.59493	down	--	--	Molecular Function: G protein-coupled receptor activity (GO:0004930);; Cellular Component: integral component of membrane (GO:0016021);;	K04309|0.0e+00|sdu:111238373|K04309 leucine-rich repeat-containing G protein-coupled receptor 4 | (RefSeq) lgr4; leucine-rich repeat-containing G-protein coupled receptor 4 isoform X1	[T]	Signal transduction mechanisms	Leucine rich repeat;; BspA type Leucine rich repeat region (6 copies);; Leucine Rich repeats (2 copies);; Leucine Rich Repeat;; Leucine-rich repeat	Leucine-rich repeat-containing G-protein coupled receptor 4 OS=Danio rerio OX=7955 GN=lgr4 PE=2 SV=1	G_PROTEIN_RECEP_F1_2 domain-containing protein OS=Seriola lalandi dorsalis OX=1841481 PE=4 SV=1	T	Signal transduction mechanisms	leucine-rich repeat-containing G-protein coupled receptor 4 isoform X1 [Seriola lalandi dorsalis]
c103487.graph_c0	2	42	47	7247	19745	2765	0.01	0.33	0.36	53.81	141.36	23.82	2.8e-20	7.76316	up	--	--	Molecular Function: calcium ion binding (GO:0005509);; Molecular Function: protein binding (GO:0005515);;	K06233|0.0e+00|hcq:109508079|K06233 low density lipoprotein-related protein 2 | (RefSeq) low-density lipoprotein receptor-related protein 2-like isoform X1	[T]	Signal transduction mechanisms	Low-density lipoprotein receptor domain class A;; Coagulation Factor Xa inhibitory site;; Low-density lipoprotein receptor repeat class B;; Calcium-binding EGF domain;; Complement Clr-like EGF-like	Low-density lipoprotein receptor-related protein 8 OS=Gallus gallus OX=9031 GN=LRP8 PE=1 SV=1	Uncharacterized protein OS=Perca fluviatilis OX=8168 GN=PFLUV_G00200010 PE=4 SV=1	T	Signal transduction mechanisms	low-density lipoprotein receptor-related protein 2-like [Seriola lalandi dorsalis]
c89186.graph_c0	389	393	574	139	120	73	13.1	14.42	18.41	4.15	3.47	2.58	0.00840011	-1.62558	down	--	--	Biological Process: negative regulation of transcription by RNA polymerase II (GO:0000122);; Cellular Component: cellular_component (GO:0005575);; Cellular Component: intracellular (GO:0005622);; Cellular Component: obsolete cell (GO:0005623);; Cellular Component: nucleus (GO:0005634);; Cellular Component: cytoplasm (GO:0005737);; Biological Process: regulation of transcription, DNA-templated (GO…	--	[U]	Intracellular trafficking, secretion, and vesicular transport	MSP (Major sperm protein) domain	--	Motile sperm domain-containing protein 1 OS=Anabas testudineus OX=64144 PE=4 SV=1	U	Intracellular trafficking, secretion, and vesicular transport	motile sperm domain-containing protein 1 [Seriola dumerili]
c103678.graph_c0	14	9742	8529	55	57	25	0.46	194.33	161.02	1.21	1.08	0.89	5.42e-05	-4.95819	down	--	--	Biological Process: cilium movement (GO:0003341);; Cellular Component: cellular_component (GO:0005575);; Cellular Component: intracellular (GO:0005622);; Cellular Component: obsolete cell (GO:0005623);; Cellular Component: cytoplasm (GO:0005737);; Cellular Component: cytoskeleton (GO:0005856);; Cellular Component: cilium (GO:0005929);; Cellular Component: axoneme (GO:0005930);; Biological Process…	--	--	--	Domain of unknown function (DUF4821);; Pyridine nucleotide-disulphide oxidoreductase	--	DUF4821 domain-containing protein OS=Lates calcarifer OX=8187 GN=CFAP61 PE=4 SV=1	S	Function unknown	cilia- and flagella-associated protein 61 [Seriola dumerili]
c89625.graph_c0	101	121	141	339	581	209	3.27	4.27	4.35	9.74	16.17	7.14	0.000379432	1.8395	up	--	--	Cellular Component: integral component of membrane (GO:0016021);;	K15285|6.8e-170|sdu:111225041|K15285 solute carrier family 35, member E3 | (RefSeq) slc35e3; solute carrier family 35 member E3	[GE]	--	Triose-phosphate Transporter family;; EamA-like transporter family	Solute carrier family 35 member E3 OS=Danio rerio OX=7955 GN=slc35e3 PE=2 SV=1	TPT domain-containing protein OS=Seriola dumerili OX=41447 PE=4 SV=1	--	--	solute carrier family 35 member E3 [Seriola dumerili]
c95361.graph_c0	121	462	490	1150	2977	488	2.47	10.23	9.53	20.83	51.27	10.45	0.00144357	2.29336	up	[J]	Translation, ribosomal structure and biogenesis	Molecular Function: nucleotide binding (GO:0000166);; Cellular Component: nuclear exosome (RNase complex) (GO:0000176);; Molecular Function: nucleic acid binding (GO:0003676);; Biological Process: RNA processing (GO:0006396);; Molecular Function: 3'-5' exonuclease activity (GO:0008408);;	K12591|0.0e+00|lco:104919432|K12591 exosome complex exonuclease RRP6 [EC:3.1.13.-] | (RefSeq) exosc10; exosome component 10	[J]	Translation, ribosomal structure and biogenesis	3'-5' exonuclease;; PMC2NT (NUC016) domain;; HRDC domain	--	Exosome component 10 OS=Collichthys lucidus OX=240159 GN=D9C73_011538 PE=4 SV=1	J	Translation, ribosomal structure and biogenesis	exosome component 10 [Larimichthys crocea]
c106872.graph_c0	59	1270	1857	81	134	51	0.82	18.07	29.91	1.07	1.64	1.24	0.00872988	-2.66269	down	--	--	Biological Process: transition metal ion transport (GO:0000041);; Molecular Function: DNA-binding transcription factor activity, RNA polymerase II-specific (GO:0000981);; Molecular Function: molecular_function (GO:0003674);; Molecular Function: chromatin binding (GO:0003682);; Molecular Function: DNA-binding transcription factor activity (GO:0003700);; Molecular Function: transcription coregulato…	K05186|5.0e-17|hai:109374352|K05186 gamma-aminobutyric acid receptor subunit gamma | (RefSeq) GABRG3; gamma-aminobutyric acid type A receptor gamma3 subunit	--	--	COMPASS (Complex proteins associated with Set1p) component shg1	Biorientation of chromosomes in cell division protein 1 OS=Xenopus laevis OX=8355 GN=bod1 PE=2 SV=1	Uncharacterized protein OS=Scophthalmus maximus OX=52904 GN=SMAX5B_009308 PE=4 SV=1	P	Inorganic ion transport and metabolism	PREDICTED: biorientation of chromosomes in cell division protein 1-like 1 [Lates calcarifer]
c94083.graph_c0	8	38	45	97	414	37	0.27	1.41	1.46	2.94	12.13	1.33	0.00510728	2.58183	up	[F]	Nucleotide transport and metabolism	Molecular Function: magnesium ion binding (GO:0000287);; Molecular Function: molecular_function (GO:0003674);; Molecular Function: binding (GO:0005488);; Molecular Function: protein binding (GO:0005515);; Biological Process: nucleoside metabolic process (GO:0009116);; Molecular Function: identical protein binding (GO:0042802);; Molecular Function: protein homodimerization activity (GO:0042803);; …	K24196|1.6e-123|lco:104918289|K24196 phosphoribosyltransferase domain-containing protein 1 | (RefSeq) hypoxanthine-guanine phosphoribosyltransferase	[F]	Nucleotide transport and metabolism	Phosphoribosyl transferase domain	Hypoxanthine-guanine phosphoribosyltransferase OS=Gallus gallus OX=9031 GN=HPRT1 PE=2 SV=1	Phosphoribosyltransferase domain-containing protein 1 OS=Larimichthys crocea OX=215358 GN=D5F01_LYC10489 PE=4 SV=1	F	Nucleotide transport and metabolism	hypoxanthine-guanine phosphoribosyltransferase [Larimichthys crocea]
c101952.graph_c1	3	2	1	87	307	32	0.15	0.11	0.05	3.97	13.59	1.73	8.29e-09	5.34147	up	--	--	--	K02741|1.6e-18|cmy:102942434|K02741 20S proteasome subunit beta 9 [EC:3.4.25.1] | (RefSeq) proteasome subunit beta type-9-like	[S]	Function unknown	Protein of unknown function (DUF3808)	Tetratricopeptide repeat protein 39A OS=Danio rerio OX=7955 GN=ttc39a PE=2 SV=1	Uncharacterized protein OS=Seriola dumerili OX=41447 PE=3 SV=1	S	Function unknown	tetratricopeptide repeat protein 39A-like isoform X1 [Seriola lalandi dorsalis]
c95100.graph_c0	127	662	494	19	95	9	8.98	45.95	30.65	0.99	4.76	0.87	0.00120089	-2.83752	down	--	--	Biological Process: pronephric glomerulus morphogenesis (GO:0035775);; Biological Process: embryonic viscerocranium morphogenesis (GO:0048703);; Biological Process: nephron tubule morphogenesis (GO:0072078);;	--	--	--	PLAC8 family	--	Uncharacterized protein OS=Seriola dumerili OX=41447 PE=3 SV=1	S	Function unknown	placenta-specific gene 8 protein-like [Seriola dumerili]
c97025.graph_c1	35	346	319	20	45	13	2.52	27.22	22.01	1.29	2.8	0.98	0.00389193	-2.46161	down	--	--	Molecular Function: MAP kinase activity (GO:0004707);; Molecular Function: ATP binding (GO:0005524);; Biological Process: gastrulation (GO:0007369);;	K04371|1.0e-73|lco:104932685|K04371 mitogen-activated protein kinase 1/3 [EC:2.7.11.24] | (RefSeq) mapk1; mitogen-activated protein kinase 1	[T]	Signal transduction mechanisms	Protein kinase domain;; Protein tyrosine and serine/threonine kinase	Mitogen-activated protein kinase 1 OS=Xenopus laevis OX=8355 GN=mapk1 PE=1 SV=3	Mitogen-activated protein kinase OS=Takifugu rubripes OX=31033 GN=mapk1 PE=3 SV=2	T	Signal transduction mechanisms	mitogen-activated protein kinase 1 [Perca flavescens]
c105339.graph_c0	104	171	133	299	732	223	2.52	4.7	3.17	6.97	15.97	4.56	0.00101447	1.8027	up	--	--	Cellular Component: extracellular region (GO:0005576);;	K06843|0.0e+00|lcf:108897074|K06843 netrin 1 | (RefSeq) netrin-1-like isoform X1	[T]	Signal transduction mechanisms	Laminin N-terminal (Domain VI);; Laminin EGF domain;; UNC-6/NTR/C345C module;; TLR4 regulator and MIR-interacting MSAP	Netrin-1 OS=Gallus gallus OX=9031 GN=NTN1 PE=1 SV=1	Uncharacterized protein OS=Seriola dumerili OX=41447 PE=4 SV=1	T	Signal transduction mechanisms	netrin-1-like [Seriola lalandi dorsalis]
c98350.graph_c0	83	301	95	28	22	24	2.16	8.57	2.36	0.65	0.49	0.66	0.00948265	-2.01096	down	[G]	Carbohydrate transport and metabolism	Molecular Function: glucuronosyltransferase activity (GO:0015020);; Cellular Component: integral component of membrane (GO:0016021);;	K00699|5.7e-227|tng:GSTEN00023394G001|K00699 glucuronosyltransferase [EC:2.4.1.17] | (RefSeq) unnamed protein product	[GC]	--	UDP-glucoronosyl and UDP-glucosyl transferase;; Glycosyltransferase family 28 C-terminal domain	UDP-glucuronosyltransferase (Fragment) OS=Pleuronectes platessa OX=8262 GN=ugt3 PE=2 SV=1	UDP glucuronosyltransferase 5 family, polypeptide E1 OS=Seriola lalandi dorsalis OX=1841481 PE=3 SV=1	G	Carbohydrate transport and metabolism	UDP-glucuronosyltransferase 2A2-like [Epinephelus lanceolatus]
c107774.graph_c1	166	372	315	728	1758	479	1.31	5.18	2.46	5.2	12.43	4.03	9.56e-05	2.02712	up	--	--	Biological Process: phosphatidylinositol biosynthetic process (GO:0006661);; Cellular Component: PAS complex (GO:0070772);;	K15305|0.0e+00|ggo:101133869|K15305 vacuole morphology and inheritance protein 14 | (RefSeq) VAC14; protein VAC14 homolog isoform X1	[S]	Function unknown	Vacuolar protein 14 C-terminal Fig4p binding;; Vacuolar 14 Fab1-binding region;; HEAT repeat;; HEAT-like repeat;; Zinc finger, C2H2 type;; Zinc-finger double domain;; C2H2-type zinc finger;; Zinc-finger of C2H2 type;; Zinc-finger double domain;; Zinc finger, C2H2 type;; C2H2-type zinc finger;; LYAR-type C2HC zinc finger	Protein VAC14 homolog OS=Danio rerio OX=7955 GN=vac14 PE=2 SV=1	Protein VAC14 homolog OS=Seriola dumerili OX=41447 PE=3 SV=1	S	Function unknown	protein VAC14 homolog [Seriola dumerili]
c96445.graph_c2	0	2	2	28	158	25	0	0.05	0.04	0.56	3.07	0.59	4.35e-07	5.06405	up	--	--	Molecular Function: protein dimerization activity (GO:0046983);;	K09080|3.4e-159|mze:101472195|K09080 neurogenic differentiation factor 6 | (RefSeq) neurogenic differentiation factor 6-B-like	[K]	Transcription	Neuronal helix-loop-helix transcription factor;; Helix-loop-helix DNA-binding domain	Neurogenic differentiation factor 6-B OS=Danio rerio OX=7955 GN=neurod6b PE=1 SV=3	BHLH domain-containing protein OS=Perca flavescens OX=8167 GN=EPR50_G00126910 PE=4 SV=1	K	Transcription	LOW QUALITY PROTEIN: neurogenic differentiation factor 6-B-like [Echeneis naucrates]
c101978.graph_c2	39	3980	3853	31	55	33	1.05	116.38	98.61	0.74	1.27	0.93	4.09e-05	-4.50139	down	--	--	--	K20045|1.1e-41|lcf:108896863|K20045 intersectin | (RefSeq) LOW QUALITY PROTEIN: intersectin-2-like	[R]	General function prediction only	C2 domain	Intersectin-1 OS=Xenopus laevis OX=8355 GN=itsn1 PE=1 SV=2	Uncharacterized protein OS=Seriola lalandi dorsalis OX=1841481 PE=3 SV=1	S	Function unknown	protein FAM228B isoform X4 [Seriola lalandi dorsalis]
c107388.graph_c1	125	1571	1894	26	54	76	3.35	41.1	41.33	0.6	1.25	2.15	0.000505985	-3.34112	down	--	--	Cellular Component: integral component of nuclear inner membrane (GO:0005639);; Cellular Component: meiotic nuclear membrane microtubule tethering complex (GO:0034993);;	K19347|7.7e-117|sdu:111216676|K19347 SUN domain-containing protein 1/2 | (RefSeq) sun2; SUN domain-containing protein 2	[D]	Cell cycle control, cell division, chromosome partitioning	Sad1 / UNC-like C-terminal	--	SUN domain-containing protein OS=Seriola dumerili OX=41447 PE=4 SV=1	D	Cell cycle control, cell division, chromosome partitioning	SUN domain-containing protein 2 [Seriola dumerili]
c107317.graph_c0	22	192	130	9	7	5	2.91	10.48	6.88	0.63	0.47	0.74	0.000216075	-3.12676	down	--	--	Molecular Function: GTP binding (GO:0005525);;	K12800|7.4e-60|xma:102228242|K12800 NACHT, LRR and PYD domains-containing protein 3 | (RefSeq) NACHT, LRR and PYD domains-containing protein 12-like	--	--	--	--	AIG1-type G domain-containing protein OS=Seriola dumerili OX=41447 PE=3 SV=1	S	Function unknown	uncharacterized protein LOC111240211 [Seriola dumerili]
c96491.graph_c0	4	5	15	5085	14255	1798	0.22	0.3	0.8	253.42	688.24	105.71	2.52e-35	9.10477	up	--	--	--	--	--	--	--	--	Uncharacterized protein OS=Scophthalmus maximus OX=52904 GN=F2P81_022910 PE=4 SV=1	--	--	C2 calcium-dependent domain-containing protein 4C-like [Seriola dumerili]
c100451.graph_c2	24	83	101	8	19	3	2.44	9.45	10.51	0.73	1.78	0.32	0.00448583	-2.25933	down	--	--	Molecular Function: actin binding (GO:0003779);; Biological Process: actin filament organization (GO:0007015);;	--	[Z]	Cytoskeleton	--	Drebrin OS=Gallus gallus OX=9031 GN=DBN1 PE=2 SV=4	ADF-H domain-containing protein OS=Mastacembelus armatus OX=205130 PE=4 SV=1	Z	Cytoskeleton	drebrin isoform X1 [Mastacembelus armatus]
c97128.graph_c0	481	3512	722	146	137	193	8.32	66.06	11.88	2.23	2.03	3.5	0.00796642	-2.38613	down	[Q]	Secondary metabolites biosynthesis, transport and catabolism	Molecular Function: peroxidase activity (GO:0004601);; Cellular Component: cytoplasm (GO:0005737);; Biological Process: inflammatory response (GO:0006954);; Biological Process: response to oxidative stress (GO:0006979);; Biological Process: response to bacterium (GO:0009617);; Biological Process: regulation of hydrogen peroxide metabolic process (GO:0010310);; Molecular Function: heme binding (GO…	K10789|0.0e+00|sasa:100380666|K10789 myeloperoxidase [EC:1.11.2.2] | (RefSeq) perm; eosinophil peroxidase	[R]	General function prediction only	Animal haem peroxidase	Peroxidasin OS=Xenopus tropicalis OX=8364 GN=pxdn PE=2 SV=1	Uncharacterized protein OS=Seriola lalandi dorsalis OX=1841481 PE=4 SV=1	S	Function unknown	eosinophil peroxidase-like [Seriola lalandi dorsalis]
c88331.graph_c0	1	8	20	83	157	25	0.15	1.29	2.82	11.09	20.43	3.88	0.000620754	3.21146	up	--	--	--	K09228|2.3e-25|lcf:108880684|K09228 KRAB domain-containing zinc finger protein | (RefSeq) gastrula zinc finger protein XlCGF57.1-like	--	--	--	--	Uncharacterized protein OS=Lates calcarifer OX=8187 GN=LOC108880684 PE=4 SV=1	S	Function unknown	gastrula zinc finger protein XlCGF57.1-like [Seriola dumerili]
c107168.graph_c2	895	14452	15988	743	1332	800	19.84	225.4	211.6	12.07	17.46	15.91	0.00595699	-2.55149	down	--	--	Molecular Function: ubiquitin-protein transferase activity (GO:0004842);; Cellular Component: integral component of membrane (GO:0016021);; Molecular Function: metal ion binding (GO:0046872);;	K11972|0.0e+00|sdu:111223178|K11972 E3 ubiquitin-protein ligase RNF19A [EC:2.3.2.31] | (RefSeq) E3 ubiquitin-protein ligase RNF19A-like	[O]	Posttranslational modification, protein turnover, chaperones	T-box;; IBR domain, a half RING-finger domain	E3 ubiquitin-protein ligase RNF19B OS=Xenopus laevis OX=8355 GN=rnf19b PE=2 SV=2	RBR-type E3 ubiquitin transferase OS=Seriola dumerili OX=41447 PE=4 SV=1	O	Posttranslational modification, protein turnover, chaperones	E3 ubiquitin-protein ligase RNF19A-like [Seriola dumerili]
c105291.graph_c1	0	2	1	233	302	89	0	0.34	0.15	32.46	40.83	14.4	3.91e-17	7.05699	up	--	--	--	--	--	--	--	--	Uncharacterized protein OS=Seriola lalandi dorsalis OX=1841481 PE=4 SV=1	--	--	kisspeptin-2 [Seriola lalandi]
c92174.graph_c0	19	314	510	25	36	10	1.17	21.17	30.08	1.38	1.92	0.65	0.00886724	-2.67383	down	--	--	Biological Process: microtubule cytoskeleton organization (GO:0000226);; Cellular Component: pericentriolar material (GO:0000242);; Biological Process: skeletal system development (GO:0001501);; Biological Process: microtubule bundle formation (GO:0001578);; Biological Process: cilium movement (GO:0003341);; Molecular Function: molecular_function (GO:0003674);; Molecular Function: binding (GO:000…	K22869|2.1e-14|sdu:111237807|K22869 WD repeat-containing protein 60 | (RefSeq) wdr60; WD repeat-containing protein 60	--	--	--	--	Uncharacterized protein OS=Perca fluviatilis OX=8168 GN=PFLUV_G00256900 PE=4 SV=1	Z	Cytoskeleton	WD repeat-containing protein 60 isoform X1 [Sander lucioperca]
c99563.graph_c0	1	217	340	2794	8076	948	0.03	6.93	9.49	72.69	204.51	29.4	0.00161427	3.86716	up	--	--	Cellular Component: nucleus (GO:0005634);; Biological Process: regulation of transcription, DNA-templated (GO:0006355);; Molecular Function: sequence-specific DNA binding (GO:0043565);;	K10164|9.5e-16|apla:101795050|K10164 homeobox protein Nanog | (RefSeq) homeobox protein NANOG isoform X1	[R]	General function prediction only	Homeodomain;; Homeodomain leucine-zipper encoding, Homez	Homeobox protein NANOG OS=Gallus gallus OX=9031 GN=NANOG PE=1 SV=2	Homeobox domain-containing protein OS=Lates calcarifer OX=8187 GN=LOC108899944 PE=4 SV=1	K	Transcription	PREDICTED: muscle-specific homeobox protein tinman-like [Lates calcarifer]
c102877.graph_c0	21	96	109	6	2	2	1.41	6.55	7.21	0.34	0.12	0.14	7.04e-05	-3.51652	down	--	--	Molecular Function: carbohydrate binding (GO:0030246);;	K10061|1.6e-40|sdu:111234101|K10061 C-type lectin superfamily 4 member G | (RefSeq) early activation antigen CD69-like	--	--	Lectin C-type domain	--	C-type lectin domain-containing protein OS=Seriola dumerili OX=41447 PE=4 SV=1	S	Function unknown	C-type lectin domain family 10 member A-like [Seriola dumerili]
c102932.graph_c0	40	93	92	140	461	100	1.08	2.59	2.2	4.09	9.92	3.38	0.00557907	1.8186	up	[T]	Signal transduction mechanisms	Molecular Function: molecular_function (GO:0003674);; Molecular Function: catalytic activity (GO:0003824);; Cellular Component: cellular_component (GO:0005575);; Cellular Component: intracellular (GO:0005622);; Cellular Component: obsolete cell (GO:0005623);; Cellular Component: cytoplasm (GO:0005737);; Molecular Function: hydrolase activity (GO:0016787);; Cellular Component: obsolete intracellul…	K13706|8.5e-142|sdu:111222909|K13706 abhydrolase domain-containing protein 14 | (RefSeq) abhd14a; protein ABHD14A	--	--	alpha/beta hydrolase fold;; Serine aminopeptidase, S33;; Alpha/beta hydrolase family	Protein ABHD14A OS=Danio rerio OX=7955 GN=abhd14a PE=2 SV=1	AB hydrolase-1 domain-containing protein OS=Lates calcarifer OX=8187 GN=abhd14a PE=4 SV=1	S	Function unknown	protein ABHD14A [Epinephelus lanceolatus]
c94707.graph_c0	5	111	54	1794	499	576	0.12	4.39	2.17	86.53	16.05	32.03	1.62e-05	4.21247	up	--	--	Molecular Function: GTPase activator activity (GO:0005096);; Molecular Function: metal ion binding (GO:0046872);; Molecular Function: phosphatidylinositol bisphosphate binding (GO:1902936);;	K12491|5.0e-19|dwi:6642423|K12491 Arf-GAP with GTPase, ANK repeat and PH domain-containing protein 1/3/4/5/6/9/11 | (RefSeq) centaurin-gamma-1A isoform X1	[T]	Signal transduction mechanisms	Putative GTPase activating protein for Arf;; PH domain	--	Uncharacterized protein OS=Seriola dumerili OX=41447 GN=ADAP1 PE=4 SV=1	T	Signal transduction mechanisms	arf-GAP with dual PH domain-containing protein 1-like [Seriola dumerili]
c101530.graph_c0	1082	551	550	46	50	55	32.17	17.32	13.26	1.18	1.25	1.74	3.5e-05	-3.35322	down	--	--	Molecular Function: ATPase activator activity (GO:0001671);; Biological Process: regulation of heart rate (GO:0002027);; Biological Process: heart morphogenesis (GO:0003007);; Biological Process: system process (GO:0003008);; Biological Process: muscle system process (GO:0003012);; Biological Process: circulatory system process (GO:0003013);; Biological Process: heart process (GO:0003015);; Biolo…	K12568|5.5e-206|mmu:17868|K12568 myosin-binding protein C, cardiac-type | (RefSeq) Mybpc3; myosin binding protein C, cardiac	--	--	Immunoglobulin I-set domain;; Immunoglobulin domain;; Immunoglobulin domain;; Immunoglobulin domain;; Immunoglobulin V-set domain;; Immunoglobulin C1-set domain;; Tri-helix bundle domain;; CD80-like C2-set immunoglobulin domain;; Fibronectin type III domain;; Immunoglobulin I-set domain	Myosin-binding protein C, cardiac-type OS=Gallus gallus OX=9031 GN=MYBPC3 PE=1 SV=3	Myosin binding protein C, cardiac OS=Echeneis naucrates OX=173247 PE=4 SV=1	T	Signal transduction mechanisms	myosin-binding protein C, cardiac-type isoform X1 [Seriola dumerili]
c85362.graph_c0	24	47	37	1258	2754	454	3.37	7.21	4.99	160.01	339.9	67.23	5.75e-19	5.3007	up	--	--	Molecular Function: calcium ion binding (GO:0005509);;	K10159|2.2e-31|xma:102230797|K10159 toll-like receptor 2 | (RefSeq) toll-like receptor 2 type-2 isoform X1	--	--	S-100/ICaBP type calcium binding domain;; EF hand	Protein S100-A1 OS=Misgurnus fossilis OX=7984 GN=s100a1 PE=1 SV=1	Protein S100 OS=Echeneis naucrates OX=173247 GN=LOC115044513 PE=3 SV=1	S	Function unknown	protein S100-A1-like [Echeneis naucrates]
c94534.graph_c0	23	1807	2974	14	25	63	0.47	40.49	58.3	0.26	0.44	1.36	0.00235651	-3.73593	down	--	--	Molecular Function: motor activity (GO:0003774);; Molecular Function: ATP binding (GO:0005524);; Cellular Component: myosin complex (GO:0016459);; Molecular Function: actin filament binding (GO:0051015);;	K10352|6.3e-42|salp:112070866|K10352 myosin heavy chain 9/10/11/14 | (RefSeq) myosin-9-like	[Z]	Cytoskeleton	Myosin tail	Myosin-11 OS=Gallus gallus OX=9031 GN=MYH11 PE=1 SV=4	Myosin, heavy chain 14, non-muscle OS=Lates calcarifer OX=8187 PE=3 SV=1	Z	Cytoskeleton	Myosin-10 Cellular myosin heavy chain, type B Myosin heavy chain 10 [Channa argus]
c102187.graph_c1	43	116	123	2	2	1	3.08	18.7	14.28	0.47	0.08	0.05	9.64e-10	-4.85605	down	--	--	--	--	--	--	--	--	--	--	--	uncharacterized protein LOC116682627 [Etheostoma spectabile]
c103459.graph_c4	149	336	446	51	131	26	4.36	10.71	12.46	1.32	3.29	0.8	0.0073175	-1.77895	down	--	--	Cellular Component: nucleus (GO:0005634);; Molecular Function: zinc ion binding (GO:0008270);;	K11457|5.1e-203|sdu:111233574|K11457 polyhomeotic-like protein 2 | (RefSeq) polyhomeotic-like protein 2 isoform X1	--	--	--	Polyhomeotic-like protein 2 OS=Danio rerio OX=7955 GN=phc2 PE=2 SV=1	Uncharacterized protein OS=Seriola lalandi dorsalis OX=1841481 PE=4 SV=1	S	Function unknown	polyhomeotic-like protein 2 isoform X1 [Seriola lalandi dorsalis]
c103298.graph_c2	14	35	41	77	188	39	0.89	2.42	2.49	4.36	10.36	2.6	0.00394949	1.95601	up	--	--	Molecular Function: zinc ion binding (GO:0008270);;	K12003|5.4e-108|sdu:111218482|K12003 tripartite motif-containing protein 13 [EC:2.3.2.27] | (RefSeq) trim13; E3 ubiquitin-protein ligase TRIM13 isoform X1	[O]	Posttranslational modification, protein turnover, chaperones	--	Tripartite motif-containing 13 OS=Danio rerio OX=7955 GN=trim13 PE=2 SV=1	Uncharacterized protein OS=Seriola dumerili OX=41447 PE=4 SV=1	O	Posttranslational modification, protein turnover, chaperones	E3 ubiquitin-protein ligase TRIM13 isoform X1 [Seriola dumerili]
c87016.graph_c0	19	47	34	141	430	69	2.8	7.58	4.83	18.87	55.42	10.71	7.78e-05	2.74108	up	--	--	Biological Process: maturation of SSU-rRNA from tricistronic rRNA transcript (SSU-rRNA, 5.8S rRNA, LSU-rRNA) (GO:0000462);; Cellular Component: cellular_component (GO:0005575);; Cellular Component: intracellular (GO:0005622);; Cellular Component: obsolete cell (GO:0005623);; Cellular Component: nucleus (GO:0005634);; Biological Process: nucleobase-containing compound metabolic process (GO:0006139…	K14800|1.9e-47|sdu:111235461|K14800 pre-rRNA-processing protein TSR2 | (RefSeq) tsr2; pre-rRNA-processing protein TSR2 homolog	[S]	Function unknown	Pre-rRNA-processing protein TSR2	Pre-rRNA-processing protein TSR2 homolog OS=Danio rerio OX=7955 GN=tsr2 PE=2 SV=1	Pre-rRNA-processing protein TSR2 homolog OS=Seriola lalandi dorsalis OX=1841481 PE=3 SV=1	S	Function unknown	pre-rRNA-processing protein TSR2 homolog [Seriola lalandi dorsalis]
c89152.graph_c0	136	266	290	548	1175	225	5.12	10.91	10.41	18.32	38.05	8.9	0.00809384	1.67963	up	[M]	Cell wall/membrane/envelope biogenesis	Biological Process: maturation of LSU-rRNA from tricistronic rRNA transcript (SSU-rRNA, 5.8S rRNA, LSU-rRNA) (GO:0000463);; Biological Process: maturation of 5.8S rRNA from tricistronic rRNA transcript (SSU-rRNA, 5.8S rRNA, LSU-rRNA) (GO:0000466);; Cellular Component: nucleoplasm (GO:0005654);; Cellular Component: nucleolus (GO:0005730);; Cellular Component: preribosome, large subunit precursor (…	K14863|1.1e-235|sdu:111222723|K14863 ribosome biogenesis protein | (RefSeq) wdr12; ribosome biogenesis protein WDR12	[Z]	Cytoskeleton	WD domain, G-beta repeat;; NLE (NUC135) domain	Ribosome biogenesis protein wdr12 OS=Danio rerio OX=7955 GN=wdr12 PE=2 SV=1	Ribosome biogenesis protein WDR12 OS=Seriola dumerili OX=41447 GN=WDR12 PE=3 SV=1	Z	Cytoskeleton	ribosome biogenesis protein WDR12 [Seriola dumerili]
c98013.graph_c0	5	2	16	63	112	42	0.13	0.06	0.4	1.46	2.5	1.15	0.000113221	3.2495	up	--	--	Molecular Function: phosphatidylinositol binding (GO:0035091);;	K17934|7.4e-203|sdu:111220155|K17934 NADPH oxidase organizer 1 | (RefSeq) NADPH oxidase organizer 1-like	--	--	SH3 domain;; Variant SH3 domain;; PX domain;; Variant SH3 domain	SH3 and PX domain-containing protein 2A OS=Danio rerio OX=7955 GN=sh3pxd2a PE=3 SV=2	Uncharacterized protein OS=Seriola dumerili OX=41447 PE=4 SV=1	T	Signal transduction mechanisms	NADPH oxidase organizer 1-like [Seriola dumerili]
c107758.graph_c1	87	154	190	332	584	141	3.89	7.46	8.01	13.08	22.22	6.55	0.00992181	1.52862	up	[J]	Translation, ribosomal structure and biogenesis	Molecular Function: RNA binding (GO:0003723);; Biological Process: digestive tract morphogenesis (GO:0048546);;	K14787|5.8e-214|lcf:108878215|K14787 multiple RNA-binding domain-containing protein 1 | (RefSeq) rbm19; probable RNA-binding protein 19	[R]	General function prediction only	RNA recognition motif. (a.k.a. RRM, RBD, or RNP domain);; Occluded RNA-recognition motif	Polyadenylate-binding protein 2-A OS=Xenopus laevis OX=8355 GN=pabpn1-a PE=2 SV=1	Uncharacterized protein OS=Seriola dumerili OX=41447 PE=4 SV=1	A	RNA processing and modification	probable RNA-binding protein 19 [Seriola lalandi dorsalis]
c97103.graph_c0	670	2494	2419	148	203	340	9.31	43.15	35.88	1.85	2.43	5.02	0.00544624	-2.17504	down	--	--	--	K22449|7.5e-233|sdu:111233105|K22449 tubulin-specific chaperone cofactor E-like protein | (RefSeq) tubulin-specific chaperone cofactor E-like protein	[S]	Function unknown	Leucine-rich repeat;; Leucine Rich repeats (2 copies)	--	Uncharacterized protein OS=Seriola lalandi dorsalis OX=1841481 PE=4 SV=1	S	Function unknown	tubulin-specific chaperone cofactor E-like protein [Seriola lalandi dorsalis]
c88096.graph_c0	6	860	643	6	37	13	0.11	17.59	11.5	0.1	0.6	0.26	0.00483114	-3.42853	down	[E]	Amino acid transport and metabolism	Biological Process: oligopeptide transport (GO:0006857);; Cellular Component: integral component of membrane (GO:0016021);; Molecular Function: transmembrane transporter activity (GO:0022857);;	K14206|0.0e+00|sdu:111222762|K14206 solute carrier family 15 (oligopeptide transporter), member 1 | (RefSeq) solute carrier family 15 member 1-like	[E]	Amino acid transport and metabolism	POT family	Solute carrier family 15 member 2 OS=Danio rerio OX=7955 GN=slc15a2 PE=1 SV=1	Uncharacterized protein OS=Seriola lalandi dorsalis OX=1841481 PE=3 SV=1	E	Amino acid transport and metabolism	solute carrier family 15 member 1-like [Seriola lalandi dorsalis]
c104027.graph_c0	158	294	288	1365	2461	532	6.95	10.36	12.12	39.55	89.56	18.11	8.28e-07	2.71874	up	[J]	Translation, ribosomal structure and biogenesis	Molecular Function: structural constituent of ribosome (GO:0003735);; Biological Process: translation (GO:0006412);; Cellular Component: small ribosomal subunit (GO:0015935);;	K02967|1.9e-140|sdu:111220811|K02967 small subunit ribosomal protein S2 | (RefSeq) mrps2; 28S ribosomal protein S2, mitochondrial	[J]	Translation, ribosomal structure and biogenesis	Ribosomal protein S2	--	Uncharacterized protein OS=Seriola dumerili OX=41447 PE=3 SV=1	J	Translation, ribosomal structure and biogenesis	28S ribosomal protein S2, mitochondrial [Echeneis naucrates]
c94095.graph_c0	0	0	5	497	1805	230	0	0	0.49	51.68	190.82	29.08	1.73e-15	7.68815	up	--	--	--	--	--	--	--	--	--	--	--	uncharacterized protein CG5098-like [Seriola lalandi dorsalis]
c99079.graph_c1	21	119	156	6	12	4	1.38	5.66	9.07	0.37	0.65	0.29	0.000265708	-2.99894	down	--	--	Cellular Component: integral component of membrane (GO:0016021);;	K17279|8.0e-84|sdu:111231827|K17279 receptor expression-enhancing protein 5/6 | (RefSeq) receptor expression-enhancing protein 6-like isoform X1	[U]	Intracellular trafficking, secretion, and vesicular transport	--	Receptor expression-enhancing protein 6 OS=Danio rerio OX=7955 GN=reep6 PE=2 SV=1	Receptor expression-enhancing protein OS=Seriola lalandi dorsalis OX=1841481 PE=3 SV=1	U	Intracellular trafficking, secretion, and vesicular transport	receptor expression-enhancing protein 6-like isoform X3 [Seriola lalandi dorsalis]
c100587.graph_c0	32	6271	6090	22	5	12	0.41	115.73	94.6	0.28	0.07	0.18	5.8e-07	-5.83042	down	--	--	Molecular Function: metal ion binding (GO:0046872);;	--	--	--	Ankyrin repeats (3 copies);; MORN repeat;; Ankyrin repeat;; Ankyrin repeat;; Ankyrin repeats (many copies);; MYND finger	--	Uncharacterized protein OS=Seriola dumerili OX=41447 PE=4 SV=1	S	Function unknown	ankyrin repeat and MYND domain-containing protein 1 [Seriola lalandi dorsalis]
c95481.graph_c2	67	314	418	55	54	22	8.56	27.65	31.46	4.32	4.34	2.2	0.00931241	-1.96038	down	--	--	Molecular Function: signaling receptor binding (GO:0005102);; Cellular Component: extracellular region (GO:0005576);; Biological Process: Notch signaling pathway (GO:0007219);; Biological Process: fibroblast growth factor receptor signaling pathway (GO:0008543);; Biological Process: Wnt signaling pathway (GO:0016055);; Biological Process: hematopoietic stem cell differentiation (GO:0060218);; Bio…	K01558|3.7e-169|lcf:108892099|K01558 wingless-type MMTV integration site family, member 16 | (RefSeq) wnt16; protein Wnt-16	[T]	Signal transduction mechanisms	wnt family	Protein Wnt-7b OS=Gallus gallus OX=9031 GN=WNT7B PE=2 SV=1	Protein Wnt OS=Lates calcarifer OX=8187 GN=wnt16 PE=3 SV=1	T	Signal transduction mechanisms	PREDICTED: protein Wnt-16 [Lates calcarifer]
c95731.graph_c0	227	393	345	683	1358	407	10.06	19	15.07	27.13	52.47	20.2	0.0019165	1.57116	up	[L]	Replication, recombination and repair	Molecular Function: molecular_function (GO:0003674);; Molecular Function: nucleic acid binding (GO:0003676);; Molecular Function: RNA helicase activity (GO:0003724);; Molecular Function: catalytic activity (GO:0003824);; Molecular Function: RNA helicase activity (GO:0004004);; Molecular Function: helicase activity (GO:0004386);; Molecular Function: ATP binding (GO:0005524);; Cellular Component: c…	K14777|5.3e-159|xco:114160188|K14777 ATP-dependent RNA helicase DDX47/RRP3 [EC:3.6.4.13] | (RefSeq) ddx47; probable ATP-dependent RNA helicase DDX47	[A]	RNA processing and modification	Helicase conserved C-terminal domain;; DEAD/DEAH box helicase;; ERCC3/RAD25/XPB C-terminal helicase;; DEAD/DEAH box helicase	Probable ATP-dependent RNA helicase DDX10 OS=Gallus gallus OX=9031 GN=DDX10 PE=2 SV=1	RNA helicase OS=Myripristis murdjan OX=586833 GN=ddx47 PE=3 SV=1	A	RNA processing and modification	probable ATP-dependent RNA helicase DDX47 [Myripristis murdjan]
c99194.graph_c2	263	1079	1310	130	216	115	37.6	166.58	177.84	16.62	26.8	17.12	0.00192349	-1.92518	down	--	--	Molecular Function: translation repressor activity, mRNA regulatory element binding (GO:0000900);; Biological Process: negative regulation of translational initiation (GO:0045947);;	--	--	--	Ataxin-2 C-terminal region	Polyadenylate-binding protein-interacting protein 2 OS=Gallus gallus OX=9031 GN=PAIP2 PE=2 SV=1	PAM2 domain-containing protein OS=Amphiprion ocellaris OX=80972 PE=3 SV=1	S	Function unknown	polyadenylate-binding protein-interacting protein 2 [Acanthochromis polyacanthus]
c103112.graph_c0	342	164	84	5	8	20	8.39	4.57	1.96	0.12	0.21	0.82	0.00171007	-3.35335	down	--	--	Molecular Function: actin binding (GO:0003779);; Biological Process: actin cytoskeleton organization (GO:0030036);; Cellular Component: cell junction (GO:0030054);;	--	--	--	Xin repeat	Xin actin-binding repeat-containing protein 1 OS=Danio rerio OX=7955 GN=xirp1 PE=1 SV=1	Uncharacterized protein OS=Seriola dumerili OX=41447 PE=3 SV=1	Z	Cytoskeleton	xin actin-binding repeat-containing protein 1-like [Seriola dumerili]
c100138.graph_c0	279	573	528	1400	2418	948	16.21	36.22	35.24	59.09	133.2	53.41	7.28e-08	2.09847	up	[J]	Translation, ribosomal structure and biogenesis	Biological Process: determination of left/right symmetry (GO:0007368);; Biological Process: Kupffer's vesicle development (GO:0070121);;	K14829|2.4e-116|sdu:111236196|K14829 pre-rRNA-processing protein IPI3 | (RefSeq) wdr18; WD repeat-containing protein 18	[R]	General function prediction only	Ribosomal protein L7/L12 C-terminal domain;; Ribosomal protein L7/L12 dimerisation domain;; Alternative WD40 repeat motif;; WD domain, G-beta repeat;; Anaphase-promoting complex subunit 4 WD40 domain	WD repeat-containing protein 18 OS=Danio rerio OX=7955 GN=wdr18 PE=2 SV=1	WD repeat-containing protein 18 OS=Seriola dumerili OX=41447 PE=3 SV=1	S	Function unknown	WD repeat-containing protein 18 [Seriola dumerili]
c89512.graph_c1	284	4483	5690	237	492	104	3	76.26	78.32	2.82	5.46	1.12	0.00315991	-2.83506	down	--	--	Biological Process: system process (GO:0003008);; Molecular Function: molecular_function (GO:0003674);; Molecular Function: catalytic activity (GO:0003824);; Molecular Function: ubiquitin-protein transferase activity (GO:0004842);; Molecular Function: binding (GO:0005488);; Cellular Component: cellular_component (GO:0005575);; Cellular Component: intracellular (GO:0005622);; Cellular Component: o…	K19041|2.4e-258|lcf:108882822|K19041 E3 ubiquitin-protein ligase RNF38/44 [EC:2.3.2.27] | (RefSeq) rnf44; RING finger protein 44 isoform X1	[O]	Posttranslational modification, protein turnover, chaperones	Ring finger domain;; RING-H2 zinc finger domain;; Zinc finger, C3HC4 type (RING finger);; Zinc finger, C3HC4 type (RING finger);; RING-like zinc finger;; Zinc finger, C3HC4 type (RING finger)	RING finger protein 44 OS=Danio rerio OX=7955 GN=rnf44 PE=2 SV=1	RING-type domain-containing protein OS=Lates calcarifer OX=8187 GN=rnf44 PE=4 SV=1	O	Posttranslational modification, protein turnover, chaperones	PREDICTED: RING finger protein 44 isoform X1 [Lates calcarifer]
c91958.graph_c0	1	44	19	391	1468	154	0.03	1.56	0.59	11.3	41.08	5.27	3.47e-06	4.62736	up	--	--	Cellular Component: connexin complex (GO:0005922);; Biological Process: cell communication (GO:0007154);; Cellular Component: integral component of membrane (GO:0016021);;	K07616|1.5e-206|sdu:111233693|K07616 gap junction gamma-1 protein | (RefSeq) gap junction gamma-1 protein-like	--	--	Connexin	Gap junction gamma-1 protein OS=Danio rerio OX=7955 GN=gjc1 PE=2 SV=1	Gap junction protein OS=Seriola lalandi dorsalis OX=1841481 PE=3 SV=1	S	Function unknown	gap junction gamma-1 protein-like [Seriola dumerili]
c94319.graph_c0	167	1383	1215	119	167	110	4.03	36.68	27.89	2.54	3.46	2.79	0.00772244	-2.058	down	--	--	Cellular Component: nucleus (GO:0005634);; Cellular Component: cytoplasm (GO:0005737);; Biological Process: cellular response to cadmium ion (GO:0071276);; Biological Process: cellular response to zinc ion (GO:0071294);;	K23317|1.4e-269|sdu:111235748|K23317 metal regulatory transcription factor 1 | (RefSeq) mtf1; metal regulatory transcription factor 1	[R]	General function prediction only	Zinc finger, C2H2 type;; Zinc-finger double domain;; C2H2-type zinc finger;; C2H2-type zinc ribbon	--	Uncharacterized protein OS=Seriola lalandi dorsalis OX=1841481 PE=4 SV=1	K	Transcription	metal regulatory transcription factor 1 [Seriola lalandi dorsalis]
c101219.graph_c0	0	3	7	4894	18686	1804	0	0.08	0.16	104.95	387.97	45.87	2.62e-31	10.0203	up	--	--	--	--	--	--	--	--	Carbonic anhydrase OS=Scophthalmus maximus OX=52904 GN=F2P81_001081 PE=3 SV=1	--	--	histone-lysine N-methyltransferase SETD1B-like [Seriola dumerili]
c82464.graph_c0	79	372	414	35	60	30	3.64	18.64	18.17	1.43	2.38	1.45	0.000993352	-2.16732	down	--	--	Cellular Component: integral component of membrane (GO:0016021);;	K12160|3.0e-26|aml:100465329|K12160 small ubiquitin-related modifier | (RefSeq) PTTG1IP; pituitary tumor-transforming gene 1 protein-interacting protein	--	--	--	--	PSI domain-containing protein OS=Seriola lalandi dorsalis OX=1841481 PE=4 SV=1	S	Function unknown	pituitary tumor-transforming gene 1 protein-interacting protein-like [Seriola lalandi dorsalis]
c107570.graph_c2	1	4418	5312	31	19	0	0.01	36.33	37.13	0.19	0.18	0	0.00346059	-4.30922	down	--	--	Molecular Function: voltage-gated calcium channel activity (GO:0005245);; Cellular Component: voltage-gated calcium channel complex (GO:0005891);; Biological Process: regulation of ion transmembrane transport (GO:0034765);;	K04849|0.0e+00|sdu:111227530|K04849 voltage-dependent calcium channel N type alpha-1B | (RefSeq) voltage-dependent N-type calcium channel subunit alpha-1B-like	[PT]	--	Ion transport protein;; Voltage-dependent L-type calcium channel, IQ-associated;; Voltage gated calcium channel IQ domain;; Polycystin cation channel	Probable voltage-dependent N-type calcium channel subunit alpha-1B OS=Diplobatis ommata OX=1870830 PE=2 SV=1	Voltage-dependent N-type calcium channel subunit alpha OS=Seriola lalandi dorsalis OX=1841481 PE=3 SV=1	--	--	voltage-dependent N-type calcium channel subunit alpha-1B-like [Seriola dumerili]
c73101.graph_c1	27	42	32	206	528	111	2.04	3.45	2.31	13.9	34.52	8.81	4.6e-07	3.10097	up	--	--	Molecular Function: RNA binding (GO:0003723);;	K23308|9.1e-96|sdu:111222753|K23308 nuclear fragile X mental retardation-interacting protein 1 | (RefSeq) nufip1; nuclear fragile X mental retardation-interacting protein 1	--	--	Nuclear fragile X mental retardation-interacting protein 1 (NUFIP1);; Zinc-finger double-stranded RNA-binding	--	C2H2-type domain-containing protein OS=Seriola dumerili OX=41447 PE=4 SV=1	S	Function unknown	nuclear fragile X mental retardation-interacting protein 1 [Seriola dumerili]
c102193.graph_c1	348	986	1240	204	240	163	4.74	14.6	16.01	2.46	2.78	2.31	0.00579001	-1.51889	down	--	--	Cellular Component: nucleus (GO:0005634);; Biological Process: brain development (GO:0007420);; Biological Process: regulation of neuron apoptotic process (GO:0043523);; Biological Process: positive regulation of transcription, DNA-templated (GO:0045893);; Molecular Function: metal ion binding (GO:0046872);; Biological Process: embryonic viscerocranium morphogenesis (GO:0048703);; Biological Proc…	K19415|0.0e+00|mze:101478139|K19415 [histone H3]-dimethyl-L-lysine9 demethylase [EC:1.14.11.65 1.14.11.-] | (RefSeq) phf8; histone lysine demethylase PHF8	[B]	Chromatin structure and dynamics	Jumonji helical domain;; JmjC domain, hydroxylase;; Cupin-like domain	Histone lysine demethylase PHF8 OS=Danio rerio OX=7955 GN=phf8 PE=1 SV=1	Uncharacterized protein OS=Neolamprologus brichardi OX=32507 PE=3 SV=1	K	Transcription	histone lysine demethylase PHF8 [Scophthalmus maximus]
c104427.graph_c0	16	17	28	148	91	37	0.29	0.33	0.48	2.33	1.39	0.69	0.00237259	2.36055	up	--	--	Molecular Function: transferase activity, transferring glycosyl groups (GO:0016757);;	K18207|0.0e+00|lcf:108876318|K18207 protein O-mannose beta-1,4-N-acetylglucosaminyltransferase [EC:2.4.1.312] | (RefSeq) pomgnt2; protein O-linked-mannose beta-1,4-N-acetylglucosaminyltransferase 2	[S]	Function unknown	Protein of unknown function (DUF563)	Protein O-linked-mannose beta-1,4-N-acetylglucosaminyltransferase 2 OS=Takifugu rubripes OX=31033 GN=pomgnt2 PE=2 SV=1	Extracellular O-linked N-acetylglucosamine transferase-like OS=Larimichthys crocea OX=215358 GN=EH28_12024 PE=3 SV=1	S	Function unknown	PREDICTED: protein O-linked-mannose beta-1,4-N-acetylglucosaminyltransferase 2 [Lates calcarifer]
c87866.graph_c0	11	203	227	1005	3922	397	0.89	17.83	17.49	72.46	274.07	33.64	0.000655553	3.45967	up	--	--	Cellular Component: fibrillar center (GO:0001650);; Molecular Function: molecular_function (GO:0003674);; Molecular Function: binding (GO:0005488);; Cellular Component: cellular_component (GO:0005575);; Cellular Component: intracellular (GO:0005622);; Cellular Component: obsolete cell (GO:0005623);; Cellular Component: nucleus (GO:0005634);; Cellular Component: nucleoplasm (GO:0005654);; Cellular…	--	--	--	Replication protein A interacting C-terminal;; Replication protein A interacting N-terminal;; Replication protein A interacting middle	RPA-interacting protein A OS=Xenopus laevis OX=8355 GN=rpain-a PE=1 SV=1	Uncharacterized protein OS=Seriola dumerili OX=41447 PE=4 SV=1	S	Function unknown	RPA-interacting protein [Seriola dumerili]
c97259.graph_c0	718	9222	8217	192	749	82	10.39	136.61	105.04	2.46	25	1.5	0.00037468	-3.37605	down	[O]	Posttranslational modification, protein turnover, chaperones	Molecular Function: calcium-dependent cysteine-type endopeptidase activity (GO:0004198);;	K08574|2.8e-289|sdu:111216896|K08574 calpain-5 [EC:3.4.22.-] | (RefSeq) capn5; calpain-5 isoform X1	[OT]	--	Calpain family cysteine protease;; Calpain large subunit, domain III;; C2 domain	Calpain-1 catalytic subunit OS=Gallus gallus OX=9031 PE=1 SV=2	Uncharacterized protein OS=Seriola dumerili OX=41447 PE=3 SV=1	--	--	calpain-5 isoform X1 [Seriola dumerili]
c103335.graph_c0	88	2129	82	31	19	27	1.68	48.55	1.52	0.52	0.31	0.59	0.00380958	-3.40925	down	--	--	Cellular Component: integral component of membrane (GO:0016021);;	K06771|3.8e-38|sfm:108919126|K06771 myelin associated glycoprotein | (RefSeq) myelin-associated glycoprotein-like	--	--	Immunoglobulin domain;; Immunoglobulin V-set domain;; CD80-like C2-set immunoglobulin domain	--	Uncharacterized protein OS=Stegastes partitus OX=144197 PE=4 SV=1	P	Inorganic ion transport and metabolism	uncharacterized protein LOC111234017 [Seriola dumerili]
c100562.graph_c0	65	145	135	287	521	129	1.89	4.59	3.74	7.4	12.95	3.92	0.00280711	1.69119	up	--	--	Molecular Function: glycolipid mannosyltransferase activity (GO:0004376);; Cellular Component: endoplasmic reticulum membrane (GO:0005789);; Biological Process: GPI anchor biosynthetic process (GO:0006506);; Cellular Component: integral component of membrane (GO:0016021);; Molecular Function: alpha-1,4-mannosyltransferase activity (GO:0051751);;	K05284|1.2e-202|lcf:108898257|K05284 GPI mannosyltransferase 1 subunit M [EC:2.4.1.-] | (RefSeq) pigm; GPI mannosyltransferase 1	[G]	Carbohydrate transport and metabolism	Mannosyltransferase (PIG-M);; GPI transamidase subunit PIG-U	GPI mannosyltransferase 1 OS=Gallus gallus OX=9031 GN=PIGM PE=2 SV=2	GPI mannosyltransferase 1 OS=Seriola lalandi dorsalis OX=1841481 PE=3 SV=1	G	Carbohydrate transport and metabolism	GPI mannosyltransferase 1 isoform X2 [Seriola lalandi dorsalis]
c105170.graph_c1	1	49	62	1624	4623	369	0.02	1.47	1.05	29.31	72.85	9.08	3.32e-07	5.29539	up	--	--	Cellular Component: integral component of membrane (GO:0016021);;	K02156|1.7e-71|tng:GSTEN00031045G001|K02156 aubergine | (RefSeq) unnamed protein product	[O]	Posttranslational modification, protein turnover, chaperones	Ring finger domain;; RING-type zinc-finger;; Zinc finger, C3HC4 type (RING finger)	--	RING-type domain-containing protein OS=Seriola dumerili OX=41447 PE=4 SV=1	O	Posttranslational modification, protein turnover, chaperones	PREDICTED: soluble scavenger receptor cysteine-rich domain-containing protein SSC5D-like [Lates calcarifer]
c87996.graph_c0	83	36	27	241	254	439	3.63	1.71	1.13	9.36	9.61	20.18	0.00830381	2.59551	up	--	--	Biological Process: sprouting angiogenesis (GO:0002040);; Biological Process: establishment of endothelial blood-brain barrier (GO:0014045);; Cellular Component: integral component of membrane (GO:0016021);; Biological Process: posterior lateral line neuromast deposition (GO:0048922);;	K05155|4.0e-194|sdu:111239093|K05155 tumor necrosis factor receptor superfamily member 19 | (RefSeq) tumor necrosis factor receptor superfamily member 19-like isoform X1	--	--	TNFR/NGFR cysteine-rich region	--	Uncharacterized protein OS=Seriola dumerili OX=41447 PE=4 SV=1	T	Signal transduction mechanisms	tumor necrosis factor receptor superfamily member 19-like isoform X1 [Seriola dumerili]
c103087.graph_c2	22	25	38	220	599	106	0.43	0.54	0.73	3.84	10.12	2.19	2.6e-07	3.41199	up	--	--	Molecular Function: G protein-coupled receptor activity (GO:0004930);; Biological Process: visual perception (GO:0007601);; Cellular Component: integral component of membrane (GO:0016021);;	K04256|4.4e-70|lcf:108885111|K04256 c-opsin | (RefSeq) pinopsin-like	--	--	--	Blue-sensitive opsin OS=Astyanax fasciatus OX=223369 GN=B23 PE=2 SV=1	Tmtops protein OS=Dicentrarchus labrax OX=13489 GN=TMTOPS PE=3 SV=1	S	Function unknown	Tmtops protein [Dicentrarchus labrax]
c90231.graph_c1	85	796	418	12	15	16	6.68	69.82	32.37	0.87	1.07	1.28	6.03e-07	-3.90809	down	--	--	Molecular Function: transcription regulatory region sequence-specific DNA binding (GO:0000976);; Molecular Function: regulatory region nucleic acid binding (GO:0001067);; Molecular Function: cis-regulatory region sequence-specific DNA binding (GO:0001158);; Molecular Function: molecular_function (GO:0003674);; Molecular Function: nucleic acid binding (GO:0003676);; Molecular Function: DNA binding…	--	--	--	--	Zinc finger protein 704 OS=Danio rerio OX=7955 GN=znf704 PE=3 SV=2	C2H2-type domain-containing protein OS=Seriola dumerili OX=41447 PE=4 SV=1	S	Function unknown	SLC2A4 regulator-like isoform X1 [Seriola lalandi dorsalis]
c105279.graph_c2	41	254	367	17	23	21	2.68	12.74	15.4	0.66	0.89	0.98	0.00150937	-2.59027	down	--	--	Cellular Component: histone deacetylase complex (GO:0000118);; Molecular Function: NAD-dependent histone deacetylase activity (H3-K14 specific) (GO:0032041);; Molecular Function: metal ion binding (GO:0046872);;	K11408|1.8e-154|sdu:111221781|K11408 histone deacetylase 7 [EC:3.5.1.98] | (RefSeq) histone deacetylase 7-like isoform X1	[B]	Chromatin structure and dynamics	--	--	Histone deacetylase OS=Seriola dumerili OX=41447 PE=3 SV=1	B	Chromatin structure and dynamics	histone deacetylase 7-like isoform X1 [Seriola dumerili]
c99796.graph_c0	911	8622	9936	529	670	472	27.99	235.21	240.62	16.51	20.08	15	0.000854889	-2.69072	down	[I]	Lipid transport and metabolism	Molecular Function: catalytic activity (GO:0003824);;	K12663|1.6e-159|sdu:111216972|K12663 Delta3,5-Delta2,4-dienoyl-CoA isomerase [EC:5.3.3.21] | (RefSeq) ech1; delta(3,5)-Delta(2,4)-dienoyl-CoA isomerase, mitochondrial isoform X1	[I]	Lipid transport and metabolism	Sperm tail;; Enoyl-CoA hydratase/isomerase;; Enoyl-CoA hydratase/isomerase	Dynein regulatory complex subunit 2 OS=Danio rerio OX=7955 GN=ccdc65 PE=2 SV=2	Uncharacterized protein OS=Seriola dumerili OX=41447 PE=4 SV=1	I	Lipid transport and metabolism	delta(3,5)-Delta(2,4)-dienoyl-CoA isomerase, mitochondrial isoform X1 [Seriola dumerili]
c105910.graph_c1	115	2465	2986	158	245	75	1.91	43.9	46.66	2.34	3.44	1.3	0.00769399	-2.65827	down	--	--	Biological Process: regulation of immune system process (GO:0002682);; Biological Process: negative regulation of immune system process (GO:0002683);; Biological Process: regulation of leukocyte activation (GO:0002694);; Biological Process: negative regulation of leukocyte activation (GO:0002695);; Cellular Component: cellular_component (GO:0005575);; Cellular Component: intracellular (GO:0005622…	K12471|1.6e-39|nfu:107395398|K12471 epsin | (RefSeq) epn3; epsin-3	--	--	LysM domain;; Domain of unknown function (DUF758)	Tumor necrosis factor, alpha-induced protein 8-like protein 2 B OS=Danio rerio OX=7955 GN=tnfaip8l2b PE=2 SV=1	LysM domain-containing protein OS=Seriola lalandi dorsalis OX=1841481 PE=4 SV=1	S	Function unknown	lysM and putative peptidoglycan-binding domain-containing protein 1 [Seriola lalandi dorsalis]
c97044.graph_c0	577	558	174	10	24	10	42	47.46	11.74	0.9	1.65	0.78	7.46e-08	-4.36584	down	--	--	Biological Process: cardioblast migration to the midline involved in heart rudiment formation (GO:0003319);; Biological Process: autophagy (GO:0006914);; Biological Process: left/right pattern formation (GO:0060972);; Biological Process: determination of heart left/right asymmetry (GO:0061371);; Biological Process: Kupffer's vesicle development (GO:0070121);; Biological Process: determination of …	K09546|2.8e-74|lcf:108882601|K09546 heat shock protein beta-7 | (RefSeq) hspb7; heat shock protein beta-7	[O]	Posttranslational modification, protein turnover, chaperones	Hsp20/alpha crystallin family	Heat shock protein beta-1 OS=Gallus gallus OX=9031 GN=HSPB1 PE=2 SV=1	SHSP domain-containing protein OS=Acanthochromis polyacanthus OX=80966 PE=3 SV=1	O	Posttranslational modification, protein turnover, chaperones	heat shock protein beta-7 isoform X2 [Echeneis naucrates]
c101070.graph_c0	1	10	10	62	100	62	0.03	0.27	0.24	1.37	2.13	1.62	7.07e-08	3.68899	up	--	--	Cellular Component: integral component of membrane (GO:0016021);;	--	--	--	Uncharacterised protein family UPF0560	Protein FAM171A2 OS=Xenopus laevis OX=8355 GN=fam171a2 PE=2 SV=1	Uncharacterized protein OS=Seriola lalandi dorsalis OX=1841481 PE=3 SV=1	S	Function unknown	protein FAM171B-like isoform X1 [Seriola lalandi dorsalis]
c100443.graph_c0	26	543	643	33	40	20	2.72	61.93	64.41	3.1	3.65	2.2	0.00559135	-2.74224	down	--	--	Biological Process: mitotic cell cycle (GO:0000278);; Biological Process: mitotic cytokinesis (GO:0000281);; Biological Process: cytokinesis (GO:0000910);; Biological Process: regulation of neurotransmitter levels (GO:0001505);; Cellular Component: cellular_component (GO:0005575);; Cellular Component: obsolete cell (GO:0005623);; Cellular Component: plasma membrane (GO:0005886);; Biological Proce…	K21842|1.5e-122|sdu:111238501|K21842 protein EFR3 | (RefSeq) efr3b; protein EFR3 homolog B isoform X1	[R]	General function prediction only	--	Protein EFR3 homolog B OS=Danio rerio OX=7955 GN=efr3b PE=3 SV=2	Uncharacterized protein OS=Lates calcarifer OX=8187 PE=4 SV=1	S	Function unknown	protein EFR3 homolog B isoform X2 [Seriola lalandi dorsalis]
c99206.graph_c0	7	67	109	1317	8150	697	0.24	2.4	3.56	41.22	243.8	25.51	1.74e-08	5.31268	up	--	--	--	K15208|1.5e-127|sdu:111232594|K15208 snRNA-activating protein complex subunit 1 | (RefSeq) snRNA-activating protein complex subunit 1-like	[A]	RNA processing and modification	Small nuclear RNA activating complex (SNAPc), subunit SNAP43	--	Uncharacterized protein OS=Seriola lalandi dorsalis OX=1841481 PE=4 SV=1	A	RNA processing and modification	snRNA-activating protein complex subunit 1-like [Seriola lalandi dorsalis]
c98052.graph_c3	178	4527	4938	227	384	159	3.01	143.49	141.36	3.35	5.45	3	0.00654322	-2.71648	down	--	--	Molecular Function: DNA binding (GO:0003677);; Cellular Component: nucleus (GO:0005634);; Molecular Function: metal ion binding (GO:0046872);;	K11446|1.3e-278|sdu:111224734|K11446 [histone H3]-trimethyl-L-lysine4 demethylase [EC:1.14.11.67] | (RefSeq) kdm5a; lysine-specific demethylase 5A isoform X1	[R]	General function prediction only	ARID/BRIGHT DNA binding domain;; jmjN domain;; PHD-finger	Lysine-specific demethylase 5B OS=Gallus gallus OX=9031 GN=KDM5B PE=2 SV=1	[Histone H3]-trimethyl-L-lysine(4) demethylase OS=Seriola dumerili OX=41447 PE=3 SV=1	K	Transcription	lysine-specific demethylase 5A isoform X2 [Seriola dumerili]
c90111.graph_c0	59	3383	4004	114	217	56	9.35	609.17	621.79	15.58	31.09	8.41	0.00428827	-3.17816	down	--	--	--	K19041|7.4e-20|sdu:111233753|K19041 E3 ubiquitin-protein ligase RNF38/44 [EC:2.3.2.27] | (RefSeq) E3 ubiquitin-protein ligase MBR2-like	--	--	--	--	RING-type domain-containing protein OS=Stegastes partitus OX=144197 PE=4 SV=1	O	Posttranslational modification, protein turnover, chaperones	uncharacterized protein DDB_G0271670-like [Seriola lalandi dorsalis]
c98572.graph_c1	18	1788	1963	28	48	13	0.36	40.16	38.12	0.48	0.85	0.28	0.000367956	-4.03136	down	--	--	Cellular Component: cytoplasm (GO:0005737);; Cellular Component: microtubule organizing center (GO:0005815);; Biological Process: determination of left/right symmetry (GO:0007368);; Biological Process: gastrulation (GO:0007369);; Biological Process: melanosome transport (GO:0032402);; Cellular Component: BBSome (GO:0034464);; Biological Process: intracellular transport (GO:0046907);; Biological P…	K16747|0.0e+00|lcf:108901889|K16747 Bardet-Biedl syndrome 2 protein | (RefSeq) bbs2; Bardet-Biedl syndrome 2 protein isoform X1	--	--	Ciliary BBSome complex subunit 2, C-terminal;; Ciliary BBSome complex subunit 2, middle region;; Ciliary BBSome complex subunit 2, N-terminal;; FG-GAP repeat	Bardet-Biedl syndrome 2 protein homolog OS=Danio rerio OX=7955 GN=bbs2 PE=2 SV=1	Bardet-Biedl syndrome 2 protein homolog OS=Lates calcarifer OX=8187 GN=bbs2 PE=4 SV=1	Z	Cytoskeleton	PREDICTED: Bardet-Biedl syndrome 2 protein isoform X1 [Lates calcarifer]
c105935.graph_c0	26	11	8	142	961	71	1.8	0.83	0.53	8.76	57.44	5.16	0.000257468	3.82285	up	--	--	--	--	--	--	FAM180 family	--	Uncharacterized protein OS=Seriola dumerili OX=41447 PE=4 SV=1	S	Function unknown	protein FAM180A [Seriola dumerili]
c105817.graph_c1	9	365	300	12	25	5	0.45	14.11	7.84	0.37	0.57	0.4	0.00603701	-3.00464	down	[R]	General function prediction only	Molecular Function: symporter activity (GO:0015293);; Cellular Component: integral component of membrane (GO:0016021);;	K05041|1.2e-226|sdu:111235447|K05041 solute carrier family 6 (neurotransmitter transporter, creatine) member 8 | (RefSeq) sodium- and chloride-dependent creatine transporter 1-like	[T]	Signal transduction mechanisms	Sodium:neurotransmitter symporter family;; Cadherin domain;; Cadherin cytoplasmic C-terminal	Creatine transporter OS=Torpedo marmorata OX=7788 PE=2 SV=1	Transporter OS=Seriola dumerili OX=41447 PE=3 SV=1	T	Signal transduction mechanisms	sodium- and chloride-dependent creatine transporter 1-like [Seriola dumerili]
c92020.graph_c0	68	65	23	1	4	1	2.33	2.43	0.72	0.03	0.12	0.04	9.61e-05	-3.97504	down	--	--	Biological Process: skeletal muscle cell differentiation (GO:0035914);; Biological Process: sarcomere organization (GO:0045214);; Biological Process: skeletal muscle fiber development (GO:0048741);;	K10473|3.6e-304|sdu:111218297|K10473 kelch repeat and BTB domain-containing protein 5/10 | (RefSeq) klhl41; kelch-like protein 41	[TR]	--	Kelch motif;; BTB/POZ domain;; BTB And C-terminal Kelch;; Kelch motif;; Galactose oxidase, central domain;; Kelch motif;; Galactose oxidase, central domain;; Kelch motif	Kelch-like protein 41a OS=Danio rerio OX=7955 GN=klhl41a PE=2 SV=1	BTB domain-containing protein OS=Lates calcarifer OX=8187 GN=klhl41 PE=4 SV=1	T	Signal transduction mechanisms	kelch-like protein 41 [Seriola dumerili]
c106775.graph_c0	281	1269	1364	129	215	72	4.1	20.09	18.89	1.66	2.68	1.1	0.000395991	-2.2431	down	--	--	Molecular Function: molecular_function (GO:0003674);; Molecular Function: nucleic acid binding (GO:0003676);; Molecular Function: DNA binding (GO:0003677);; Molecular Function: catalytic activity (GO:0003824);; Molecular Function: ubiquitin-protein transferase activity (GO:0004842);; Molecular Function: binding (GO:0005488);; Biological Process: regulation of transcription, DNA-templated (GO:0006…	--	[O]	Posttranslational modification, protein turnover, chaperones	Zinc finger, C3HC4 type (RING finger);; Ring finger domain;; Zinc finger, C3HC4 type (RING finger);; Zinc finger, C3HC4 type (RING finger)	RING finger protein 141 OS=Danio rerio OX=7955 GN=rnf141 PE=2 SV=2	RING finger protein 141 OS=Seriola lalandi dorsalis OX=1841481 PE=4 SV=1	O	Posttranslational modification, protein turnover, chaperones	RING finger protein 141 isoform X1 [Seriola dumerili]
c102672.graph_c0	0	0	0	265	663	84	0	0	0	5.9	14.44	2.25	7.64e-16	8.42854	up	--	--	--	K02184|0.0e+00|sdu:111235377|K02184 formin 2 | (RefSeq) formin-2-like	--	--	--	--	FH2 domain-containing protein OS=Seriola dumerili OX=41447 PE=4 SV=1	--	--	formin-2-like [Seriola dumerili]
c98281.graph_c0	0	16	23	230	536	72	0	0.67	0.75	7.01	14.57	2.17	3.82e-05	4.19288	up	[O]	Posttranslational modification, protein turnover, chaperones	Molecular Function: serine-type endopeptidase activity (GO:0004252);;	K09640|7.1e-168|lcf:108892196|K09640 transmembrane protease serine 9 [EC:3.4.21.-] | (RefSeq) transmembrane protease serine 9-like isoform X1	[E]	Amino acid transport and metabolism	Trypsin;; Domain of unknown function (DUF1986);; Trypsin;; Domain of unknown function (DUF1986)	Acrosin OS=Meleagris gallopavo OX=9103 GN=ACR PE=1 SV=1	Uncharacterized protein OS=Seriola dumerili OX=41447 PE=4 SV=1	E	Amino acid transport and metabolism	transmembrane protease serine 9-like [Seriola lalandi dorsalis]
c106776.graph_c1	58	131	158	301	816	147	1.97	4.83	5.1	9.07	23.77	5.27	0.00225683	2.02999	up	[J]	Translation, ribosomal structure and biogenesis	Biological Process: tRNA processing (GO:0008033);;	K00784|2.8e-253|sdu:111217532|K00784 ribonuclease Z [EC:3.1.26.11] | (RefSeq) elac2; zinc phosphodiesterase ELAC protein 2	[R]	General function prediction only	Beta-lactamase superfamily domain;; Metallo-beta-lactamase superfamily	--	ElaC homolog protein 2 OS=Seriola lalandi dorsalis OX=1841481 PE=3 SV=1	S	Function unknown	zinc phosphodiesterase ELAC protein 2 isoform X2 [Seriola lalandi dorsalis]
c92262.graph_c0	198	430	413	853	1849	626	5.63	13.3	11.2	21.48	45.09	18.68	1.53e-05	1.96054	up	--	--	--	K13675|9.8e-16|nai:NECAME_11940|K13675 UDP-glucose:O-linked fucose beta-1,3-glucosyltransferase [EC:2.4.1.-] | (RefSeq) Rab5-interacting protein	[U]	Intracellular trafficking, secretion, and vesicular transport	Rab5-interacting protein (Rab5ip)	--	Uncharacterized protein OS=Sparus aurata OX=8175 GN=rab5if PE=4 SV=1	U	Intracellular trafficking, secretion, and vesicular transport	uncharacterized protein RAB5IF [Hippoglossus stenolepis]
c102657.graph_c0	33	9	14	89	262	70	0.69	0.2	0.28	1.64	4.68	1.53	0.00837309	2.53299	up	[T]	Signal transduction mechanisms	Cellular Component: integral component of membrane (GO:0016021);; Molecular Function: superoxide-generating NADPH oxidase activity (GO:0016175);; Biological Process: superoxide anion generation (GO:0042554);;	K08008|0.0e+00|sdu:111232354|K08008 NADPH oxidase 1 | (RefSeq) nox1; NADPH oxidase 1	[PQ]	--	Ferric reductase NAD binding domain;; Ferric reductase like transmembrane component;; FAD-binding domain	--	FAD-binding FR-type domain-containing protein OS=Seriola lalandi dorsalis OX=1841481 PE=4 SV=1	--	--	NADPH oxidase 1 [Seriola dumerili]
c98178.graph_c0	52	130	135	23	32	23	3.19	8.7	7.92	1.26	1.7	1.48	0.00855608	-1.49735	down	--	--	Cellular Component: nucleosome (GO:0000786);; Molecular Function: DNA binding (GO:0003677);; Molecular Function: guanyl-nucleotide exchange factor activity (GO:0005085);; Biological Process: small GTPase mediated signal transduction (GO:0007264);; Molecular Function: protein heterodimerization activity (GO:0046982);; Biological Process: pronephros development (GO:0048793);;	K03099|4.7e-200|sdu:111225570|K03099 son of sevenless | (RefSeq) sos2; son of sevenless homolog 2	[T]	Signal transduction mechanisms	RasGEF N-terminal motif;; PH domain;; RasGEF domain	--	Uncharacterized protein OS=Seriola dumerili OX=41447 PE=4 SV=1	T	Signal transduction mechanisms	son of sevenless homolog 2 [Seriola lalandi dorsalis]
c105014.graph_c4	210	3363	4298	260	342	170	4.71	65.6	73.4	4.26	5.43	3.71	0.00904685	-2.47165	down	--	--	Cellular Component: centrosome (GO:0005813);; Biological Process: microtubule anchoring at centrosome (GO:0034454);; Biological Process: cilium assembly (GO:0060271);; Biological Process: protein localization to centrosome (GO:0071539);;	K16537|6.4e-264|sdu:111216722|K16537 pericentriolar material 1 protein | (RefSeq) pcm1; pericentriolar material 1 protein	--	--	--	Pericentriolar material 1 protein OS=Xenopus laevis OX=8355 GN=pcm1 PE=1 SV=1	PCM1_C domain-containing protein OS=Seriola dumerili OX=41447 PE=4 SV=1	S	Function unknown	pericentriolar material 1 protein [Seriola dumerili]
c105367.graph_c0	31	271	425	16	39	13	0.39	4.07	5.64	0.23	0.47	0.32	0.00310551	-2.6504	down	[T]	Signal transduction mechanisms	Molecular Function: phosphoprotein phosphatase activity (GO:0004721);; Molecular Function: iron ion binding (GO:0005506);; Molecular Function: calcium ion binding (GO:0005509);; Molecular Function: manganese ion binding (GO:0030145);; Biological Process: detection of stimulus involved in sensory perception (GO:0050906);;	K13807|0.0e+00|sdu:111236447|K13807 serine/threonine-protein phosphatase with EF-hands [EC:3.1.3.16] | (RefSeq) serine/threonine-protein phosphatase with EF-hands 2-like	[T]	Signal transduction mechanisms	Calcineurin-like phosphoesterase;; EF hand;; EF-hand domain pair;; EF-hand domain;; EF hand;; EF-hand domain pair;; PPP5 TPR repeat region	Serine/threonine-protein phosphatase PP1-beta catalytic subunit OS=Gallus gallus OX=9031 GN=PPP1CB PE=1 SV=3	Serine/threonine-protein phosphatase with EF-hands OS=Seriola lalandi dorsalis OX=1841481 PE=3 SV=1	T	Signal transduction mechanisms	serine/threonine-protein phosphatase with EF-hands 2-like [Seriola lalandi dorsalis]
c94066.graph_c0	58	288	234	34	24	19	4.13	22.84	16.51	2.21	1.54	1.41	0.00197355	-2.19659	down	--	--	Molecular Function: nucleic acid binding (GO:0003676);; Molecular Function: zinc ion binding (GO:0008270);;	--	--	--	--	--	DBF4-type domain-containing protein OS=Scophthalmus maximus OX=52904 GN=SMAX5B_002119 PE=4 SV=1	S	Function unknown	DBF4-type zinc finger-containing protein 2 isoform X2 [Seriola lalandi dorsalis]
c98717.graph_c0	110	1681	2243	28	67	42	1.52	26.11	28.16	0.68	0.82	0.73	2.95e-05	-3.80921	down	--	--	Cellular Component: acrosomal vesicle (GO:0001669);; Cellular Component: cellular_component (GO:0005575);; Cellular Component: intracellular (GO:0005622);; Cellular Component: obsolete cell (GO:0005623);; Cellular Component: nucleus (GO:0005634);; Cellular Component: cytoplasm (GO:0005737);; Cellular Component: cilium (GO:0005929);; Biological Process: cell communication (GO:0007154);; Biological…	--	[T]	Signal transduction mechanisms	T-complex protein 11	--	Uncharacterized protein OS=Seriola dumerili OX=41447 PE=3 SV=1	T	Signal transduction mechanisms	T-complex protein 11-like protein 1 [Seriola dumerili]
c106740.graph_c0	29	195	71	6	6	8	2.44	14.55	4.92	0.28	0.45	0.46	0.000568172	-2.9599	down	--	--	--	K06727|3.0e-158|sdu:111239944|K06727 Fc receptor-like protein | (RefSeq) Fc receptor-like protein 5	--	--	Immunoglobulin domain;; Immunoglobulin domain;; Immunoglobulin V-set domain;; Immunoglobulin domain;; Immunoglobulin I-set domain	--	Uncharacterized protein OS=Sparus aurata OX=8175 PE=4 SV=1	T	Signal transduction mechanisms	Fc receptor-like protein 5 [Seriola dumerili]
c107889.graph_c0	177	356	250	548	1118	367	1.9	4.15	2.55	5.18	10.23	4.12	0.00124214	1.62567	up	[J]	Translation, ribosomal structure and biogenesis	Molecular Function: RNA helicase activity (GO:0003724);; Molecular Function: translation initiation factor activity (GO:0003743);; Molecular Function: ATP binding (GO:0005524);; Cellular Component: cytoplasm (GO:0005737);; Biological Process: positive regulation of translational initiation (GO:0045948);;	K18995|0.0e+00|lcf:108890994|K18995 ATP-dependent RNA helicase DHX29 [EC:3.6.4.13] | (RefSeq) ATP-dependent RNA helicase Dhx29-like	[A]	RNA processing and modification	Helicase associated domain (HA2);; Helicase conserved C-terminal domain;; Oligonucleotide/oligosaccharide-binding (OB)-fold;; DEAD/DEAH box helicase	ATP-dependent RNA helicase dhx29 OS=Xenopus laevis OX=8355 GN=dhx29 PE=2 SV=1	ATP-dependent RNA helicase DHX29 OS=Lates calcarifer OX=8187 GN=LOC108890994 PE=3 SV=1	A	RNA processing and modification	PREDICTED: ATP-dependent RNA helicase Dhx29-like [Lates calcarifer]
c106846.graph_c0	204	449	521	1157	2211	533	4.18	10	10.15	20.96	38.77	11.45	0.000391695	1.97768	up	--	--	Cellular Component: nucleolus (GO:0005730);; Cellular Component: cytoplasm (GO:0005737);; Biological Process: rRNA processing (GO:0006364);; Cellular Component: small-subunit processome (GO:0032040);;	K14554|0.0e+00|sdu:111238824|K14554 U3 small nucleolar RNA-associated protein 21 | (RefSeq) wdr36; WD repeat-containing protein 36	[R]	General function prediction only	Utp21 specific WD40 associated putative domain;; WD domain, G-beta repeat;; Anaphase-promoting complex subunit 4 WD40 domain	--	WD_REPEATS_REGION domain-containing protein OS=Anabas testudineus OX=64144 PE=4 SV=1	S	Function unknown	WD repeat-containing protein 36 [Seriola dumerili]
c88011.graph_c0	1	10405	1869	9	35	1	0.02	235.49	37.26	0.17	0.61	0.02	0.000460903	-4.92684	down	--	--	Molecular Function: transposase activity (GO:0004803);; Biological Process: transposition, DNA-mediated (GO:0006313);;	K23209|1.3e-98|hst:105180859|K23209 DNA transposase THAP9 [EC:2.7.7.-] | (RefSeq) uncharacterized protein LOC105180859 isoform X1	--	--	Transposase protein	--	Transposable element P transposase OS=Anabarilius grahami OX=495550 GN=DPX16_18172 PE=4 SV=1	S	Function unknown	uncharacterized protein LOC117529457 isoform X2 [Thalassophryne amazonica]
c95118.graph_c1	1172	1598	1617	4821	9023	2819	17.73	26.21	23.21	64.37	116.58	44.56	2.21e-05	2.10604	up	[L]	Replication, recombination and repair	Molecular Function: DNA binding (GO:0003677);; Molecular Function: DNA topoisomerase type I (single strand cut, ATP-independent) activity (GO:0003917);; Cellular Component: chromosome (GO:0005694);; Biological Process: DNA topological change (GO:0006265);;	K03163|4.2e-302|sdu:111221915|K03163 DNA topoisomerase I [EC:5.6.2.1] | (RefSeq) DNA topoisomerase 1-like isoform X1	[L]	Replication, recombination and repair	Eukaryotic DNA topoisomerase I, catalytic core;; Eukaryotic DNA topoisomerase I, DNA binding fragment;; C-terminal topoisomerase domain	DNA topoisomerase 1 OS=Xenopus laevis OX=8355 GN=top1 PE=2 SV=1	DNA topoisomerase I OS=Dicentrarchus labrax OX=13489 GN=TOP1 PE=3 SV=1	L	Replication, recombination and repair	DNA topoisomerase 1 [Dicentrarchus labrax]
c100614.graph_c0	56	193	270	409	1649	205	1.19	4.46	5.46	7.69	30.05	4.57	0.00825403	2.2155	up	--	--	Cellular Component: nucleolus (GO:0005730);; Biological Process: protein desumoylation (GO:0016926);; Molecular Function: ubiquitin-like protein-specific protease activity (GO:0019783);;	K08594|7.8e-231|sdu:111229010|K08594 sentrin-specific protease 5 [EC:3.4.22.68] | (RefSeq) sentrin-specific protease 5-like	[O]	Posttranslational modification, protein turnover, chaperones	Ulp1 protease family, C-terminal catalytic domain	--	ULP_PROTEASE domain-containing protein OS=Seriola dumerili OX=41447 PE=3 SV=1	O	Posttranslational modification, protein turnover, chaperones	sentrin-specific protease 5-like isoform X1 [Seriola lalandi dorsalis]
c102225.graph_c0	106	219	209	438	964	295	1.67	4.28	3.63	7.19	15.43	5.18	7.63e-05	1.92384	up	[G]	Carbohydrate transport and metabolism	--	K15719|6.1e-223|ngi:103744007|K15719 protein O-GlcNAcase / histone acetyltransferase [EC:3.2.1.169 2.3.1.48] | (RefSeq) Mgea5; meningioma expressed antigen 5 (hyaluronidase)	[O]	Posttranslational modification, protein turnover, chaperones	beta-N-acetylglucosaminidase	--	Uncharacterized protein OS=Seriola lalandi dorsalis OX=1841481 PE=4 SV=1	O	Posttranslational modification, protein turnover, chaperones	protein O-GlcNAcase-like [Seriola lalandi dorsalis]
c94146.graph_c0	5	18	11	165	507	104	0.1	0.41	0.22	3.07	9.09	2.29	1.12e-11	4.50321	up	--	--	--	K02874|4.1e-09|bmy:Bm1_29670|K02874 large subunit ribosomal protein L14 | (RefSeq) Ribosomal protein L14p/L23e containing protein	--	--	Family of unknown function (DUF5522)	--	Uncharacterized protein OS=Lates calcarifer OX=8187 GN=cunh1orf53 PE=4 SV=1	S	Function unknown	PREDICTED: uncharacterized protein C1orf53 homolog isoform X1 [Lates calcarifer]
c104000.graph_c0	211	560	231	905	2768	923	5.3	20.88	7.08	21.26	62.09	24.83	0.000187082	2.3794	up	--	--	Molecular Function: calcium-dependent cysteine-type endopeptidase activity (GO:0004198);; Molecular Function: calcium ion binding (GO:0005509);; Biological Process: regulation of cytoskeleton organization (GO:0051493);;	K03853|0.0e+00|sdu:111220638|K03853 calpain-2 [EC:3.4.22.53] | (RefSeq) calpain-2 catalytic subunit-like	[OT]	--	Calpain family cysteine protease;; Calpain large subunit, domain III;; EF hand;; EF-hand domain	Calpain-2 catalytic subunit OS=Gallus gallus OX=9031 GN=CAPN2 PE=2 SV=3	Calcium-activated neutral proteinase 2 OS=Seriola lalandi dorsalis OX=1841481 GN=CAPN2 PE=3 SV=1	--	--	calpain-2 catalytic subunit-like [Seriola lalandi dorsalis]
c106776.graph_c0	58	63	113	195	569	100	2.77	3.3	5.2	8.63	24.26	5.35	0.00804024	1.9377	up	--	--	Biological Process: tRNA processing (GO:0008033);;	K00784|1.6e-157|sdu:111217532|K00784 ribonuclease Z [EC:3.1.26.11] | (RefSeq) elac2; zinc phosphodiesterase ELAC protein 2	[R]	General function prediction only	tRNase Z endonuclease	--	ElaC homolog protein 2 OS=Lates calcarifer OX=8187 GN=ELAC2 PE=3 SV=1	S	Function unknown	zinc phosphodiesterase ELAC protein 2 [Seriola dumerili]
c88271.graph_c0	281	675	679	1776	3520	845	9.12	23.87	21	51.16	98.13	28.8	7.45e-05	2.1508	up	--	--	Molecular Function: RNA binding (GO:0003723);;	--	--	--	Nuclear fragile X mental retardation-interacting protein 2	--	Uncharacterized protein OS=Seriola dumerili OX=41447 PE=4 SV=1	S	Function unknown	uncharacterized protein LOC111224707 [Seriola dumerili]
c100492.graph_c0	18	34	34	82	209	37	0.85	1.79	1.6	3.54	8.71	1.84	0.00304169	2.05106	up	--	--	Molecular Function: protein kinase activity (GO:0004672);; Molecular Function: ATP binding (GO:0005524);; Cellular Component: integral component of membrane (GO:0016021);;	K05127|7.8e-152|sdu:111220714|K05127 PTK7 protein tyrosine kinase 7 [EC:2.7.10.1] | (RefSeq) ptk7; inactive tyrosine-protein kinase 7 isoform X1	[RP]	--	Immunoglobulin domain;; Immunoglobulin I-set domain;; Immunoglobulin domain;; Immunoglobulin domain;; Immunoglobulin C1-set domain;; Immunoglobulin V-set domain;; CD80-like C2-set immunoglobulin domain	Inactive tyrosine-protein kinase 7 OS=Gallus gallus OX=9031 GN=PTK7 PE=2 SV=1	Uncharacterized protein OS=Seriola dumerili OX=41447 GN=PTK7 PE=3 SV=1	T	Signal transduction mechanisms	inactive tyrosine-protein kinase 7 isoform X1 [Seriola lalandi dorsalis]
c105209.graph_c0	77	701	772	20	58	19	1.71	16.93	16.32	0.39	1.1	0.44	8.45e-05	-3.22435	down	--	--	Molecular Function: histone acetyltransferase activity (GO:0004402);; Cellular Component: nucleus (GO:0005634);; Biological Process: regulation of transcription, DNA-templated (GO:0006355);; Molecular Function: zinc ion binding (GO:0008270);;	K11307|2.3e-70|lcf:108898595|K11307 histone acetyltransferase MYST2 [EC:2.3.1.48] | (RefSeq) histone acetyltransferase KAT7-like isoform X1	[B]	Chromatin structure and dynamics	MOZ/SAS family	--	Histone acetyltransferase OS=Lates calcarifer OX=8187 GN=LOC108898595 PE=3 SV=1	B	Chromatin structure and dynamics	histone acetyltransferase KAT7-like isoform X1 [Betta splendens]
c88133.graph_c0	3	15	4	26	65	19	0.36	1.94	0.45	2.91	7.26	2.37	0.00381471	2.46408	up	--	--	Biological Process: brain development (GO:0007420);; Biological Process: heart development (GO:0007507);;	K16198|6.2e-99|lcf:108893914|K16198 14-3-3 protein gamma/eta | (RefSeq) 14-3-3 protein gamma-1	[O]	Posttranslational modification, protein turnover, chaperones	14-3-3 protein	14-3-3 protein gamma-1 OS=Danio rerio OX=7955 GN=ywhag1 PE=2 SV=1	14_3_3 domain-containing protein OS=Oryzias latipes OX=8090 PE=3 SV=1	O	Posttranslational modification, protein turnover, chaperones	14-3-3 protein gamma-1 [Fundulus heteroclitus]
c89260.graph_c0	1750	9706	12438	761	564	1095	51.75	313.53	351.74	20.01	14.32	34.07	0.00614836	-2.34596	down	[T]	Signal transduction mechanisms	Cellular Component: integral component of membrane (GO:0016021);;	K13704|1.3e-101|lcf:108886274|K13704 abhydrolase domain-containing protein 12 [EC:3.1.1.23] | (RefSeq) monoacylglycerol lipase ABHD12-like	[R]	General function prediction only	alpha/beta hydrolase fold;; Serine aminopeptidase, S33;; Alpha/beta hydrolase family	Lysophosphatidylserine lipase ABHD12 OS=Xenopus tropicalis OX=8364 GN=abhd12 PE=2 SV=1	AB hydrolase-1 domain-containing protein OS=Lates calcarifer OX=8187 GN=LOC108886274 PE=4 SV=1	S	Function unknown	PREDICTED: monoacylglycerol lipase ABHD12-like [Lates calcarifer]
c99874.graph_c0	33	487	763	15	51	14	0.87	12.13	16.17	0.29	0.96	0.32	0.00152002	-3.11688	down	--	--	--	K05401|2.8e-55|mna:107535753|K05401 toll-like receptor 3 | (RefSeq) TLR3; toll-like receptor 3 isoform X1	--	--	Protein of unknown function (DUF3719)	Protein FAM149B1 OS=Danio rerio OX=7955 GN=fam149b1 PE=2 SV=1	DUF3719 domain-containing protein OS=Seriola dumerili OX=41447 PE=3 SV=1	S	Function unknown	protein FAM149B1-like isoform X2 [Seriola dumerili]
c107274.graph_c0	70	198	280	552	1631	251	1.6	4.71	5.91	10.74	31.31	5.78	0.0018664	2.29424	up	--	--	Molecular Function: mannosyltransferase activity (GO:0000030);; Cellular Component: integral component of membrane (GO:0016021);;	K03842|1.5e-247|sdu:111217543|K03842 beta-1,4-mannosyltransferase [EC:2.4.1.142] | (RefSeq) alg1; chitobiosyldiphosphodolichol beta-mannosyltransferase	[O]	Posttranslational modification, protein turnover, chaperones	Glycosyl transferases group 1;; Glycosyl transferases group 1;; Family of unknown function;; Lysine methyltransferase	--	Glycos_transf_1 domain-containing protein OS=Seriola dumerili OX=41447 PE=4 SV=1	O	Posttranslational modification, protein turnover, chaperones	chitobiosyldiphosphodolichol beta-mannosyltransferase [Seriola lalandi dorsalis]
c92781.graph_c0	42	71	93	265	612	125	1.18	2.13	2.44	6.48	14.49	3.62	7.16e-05	2.42374	up	--	--	Cellular Component: Golgi membrane (GO:0000139);; Biological Process: morphogenesis of an epithelium (GO:0002009);; Biological Process: instar larval or pupal development (GO:0002165);; Cellular Component: cellular_component (GO:0005575);; Cellular Component: intracellular (GO:0005622);; Cellular Component: obsolete cell (GO:0005623);; Cellular Component: cytoplasm (GO:0005737);; Cellular Compone…	--	[U]	Intracellular trafficking, secretion, and vesicular transport	GRASP55/65 PDZ-like domain;; PDZ domain;; PDZ domain	--	GRASP55_65 domain-containing protein OS=Seriola dumerili OX=41447 PE=3 SV=1	U	Intracellular trafficking, secretion, and vesicular transport	Golgi reassembly-stacking protein 1-like [Seriola dumerili]
c104886.graph_c0	231	87	55	5	18	6	18.44	9.71	5.83	0.43	1.26	0.42	0.00101622	-3.31976	down	--	--	--	K06733|3.2e-13|amex:111189531|K06733 SLAM family member 7 | (RefSeq) SLAM family member 9-like	--	--	--	--	Uncharacterized protein OS=Larimichthys crocea OX=215358 GN=D5F01_LYC10164 PE=4 SV=1	S	Function unknown	natural killer cell receptor 2B4-like [Seriola dumerili]
c100176.graph_c0	159	236	214	526	1286	235	8.05	12.91	10.26	23.56	56.61	12.38	0.00558118	1.8353	up	--	--	Biological Process: ribosome biogenesis (GO:0042254);;	K02864|3.2e-118|sdu:111220137|K02864 large subunit ribosomal protein L10 | (RefSeq) mrpl10; 39S ribosomal protein L10, mitochondrial	[J]	Translation, ribosomal structure and biogenesis	Ribosomal protein L10	39S ribosomal protein L10, mitochondrial OS=Danio rerio OX=7955 GN=mrpl10 PE=2 SV=1	Uncharacterized protein OS=Seriola lalandi dorsalis OX=1841481 PE=3 SV=1	J	Translation, ribosomal structure and biogenesis	39S ribosomal protein L10, mitochondrial [Seriola dumerili]
c95363.graph_c0	2	9	8	7477	19998	2939	0.14	0.7	0.55	473.91	1236	219.67	6.95e-49	10.0663	up	--	--	Cellular Component: nucleosome (GO:0000786);; Molecular Function: DNA binding (GO:0003677);; Cellular Component: nucleus (GO:0005634);; Biological Process: nucleosome assembly (GO:0006334);; Cellular Component: host cell nucleus (GO:0042025);;	K11275|9.5e-11|crg:105340504|K11275 histone H1/5 | (RefSeq) sperm-specific protein PHI-2B/PHI-3-like	[B]	Chromatin structure and dynamics	linker histone H1 and H5 family	Protein B4 OS=Xenopus laevis OX=8355 GN=b4 PE=1 SV=1	H15 domain-containing protein OS=Seriola dumerili OX=41447 PE=3 SV=1	B	Chromatin structure and dynamics	protein B4 [Hippoglossus hippoglossus]
c94138.graph_c0	259	216	209	899	1476	465	16.54	14.97	12.74	51.02	81.19	31.16	0.00172472	2.08597	up	--	--	Cellular Component: nucleus (GO:0005634);; Biological Process: ribosome biogenesis (GO:0042254);;	K14852|3.4e-155|sdu:111220920|K14852 regulator of ribosome biosynthesis | (RefSeq) rrs1; ribosome biogenesis regulatory protein homolog	[J]	Translation, ribosomal structure and biogenesis	Ribosome biogenesis regulatory protein (RRS1)	--	Ribosome biogenesis regulatory protein OS=Lates calcarifer OX=8187 GN=rrs1 PE=3 SV=1	J	Translation, ribosomal structure and biogenesis	ribosome biogenesis regulatory protein homolog [Seriola lalandi dorsalis]
c103864.graph_c0	795	1941	2161	3817003	1565876	2435571	7.93	21.05	20.5	33607.2	13344.8	25476.9	2.29e-69	10.5991	up	--	--	Molecular Function: lipid transporter activity (GO:0005319);;	--	--	--	Lipoprotein amino terminal region;; Domain of unknown function (DUF1943);; Domain of unknown function (DUF1944);; von Willebrand factor type D domain	Vitellogenin OS=Oncorhynchus mykiss OX=8022 GN=vtg1 PE=1 SV=1	Phosvitin OS=Seriola dumerili OX=41447 PE=4 SV=1	I	Lipid transport and metabolism	LOW QUALITY PROTEIN: vitellogenin-2-like [Seriola dumerili]
c93747.graph_c0	10	69	79	254	773	110	0.49	2.84	3.49	8.76	25.31	4.72	0.000487199	2.93787	up	--	--	Cellular Component: integral component of membrane (GO:0016021);;	K20030|2.2e-31|acyg:106033835|K20030 palmitoyltransferase ZDHHC5/8 [EC:2.3.1.225] | (RefSeq) palmitoyltransferase ZDHHC5-like	[O]	Posttranslational modification, protein turnover, chaperones	Thioredoxin	Thioredoxin-related transmembrane protein 2-B OS=Danio rerio OX=7955 GN=tmx2b PE=2 SV=1	Thioredoxin domain-containing protein OS=Seriola dumerili OX=41447 PE=4 SV=1	O	Posttranslational modification, protein turnover, chaperones	thioredoxin-related transmembrane protein 2 [Seriola dumerili]
c95066.graph_c0	7	2950	2934	34	60	8	0.27	124.12	108.11	1.17	1.99	0.32	0.000918118	-4.16951	down	--	--	Molecular Function: protein binding (GO:0005515);; Cellular Component: cellular_component (GO:0005575);; Cellular Component: obsolete cell (GO:0005623);; Cellular Component: plasma membrane (GO:0005886);; Biological Process: cell communication (GO:0007154);; Biological Process: signal transduction (GO:0007165);; Biological Process: biological_process (GO:0008150);; Biological Process: cellular pr…	K14837|2.1e-10|adf:107327593|K14837 nucleolar protein 12 | (RefSeq) nucleolar protein 12-like	--	--	Leucine rich repeat;; Leucine Rich repeats (2 copies);; Leucine Rich Repeat	--	Uncharacterized protein OS=Perca flavescens OX=8167 GN=EPR50_G00174180 PE=4 SV=1	K	Transcription	PREDICTED: LOW QUALITY PROTEIN: leucine-rich repeat-containing protein 27 [Lates calcarifer]
c94051.graph_c1	51	8132	9264	26	13	2	0.94	174.47	172.72	0.47	0.2	0.03	9.14e-08	-6.2328	down	--	--	Molecular Function: RNA binding (GO:0003723);; Molecular Function: methyltransferase activity (GO:0008168);; Biological Process: methylation (GO:0032259);;	K15264|5.4e-25|acs:100552807|K15264 25S rRNA (cytosine2278-C5)-methyltransferase [EC:2.1.1.311] | (RefSeq) nsun5; NOP2/Sun RNA methyltransferase family member 5	--	--	--	--	SAM_MT_RSMB_NOP domain-containing protein OS=Seriola dumerili OX=41447 PE=3 SV=1	D	Cell cycle control, cell division, chromosome partitioning	putative methyltransferase NSUN7 isoform X1 [Seriola dumerili]
c86614.graph_c0	36	81	48	373	1160	120	1.41	3.46	1.8	13.18	39.68	5.02	2.64e-05	3.23334	up	--	--	Molecular Function: motor activity (GO:0003774);; Molecular Function: ATP binding (GO:0005524);; Cellular Component: myosin complex (GO:0016459);; Molecular Function: actin filament binding (GO:0051015);;	K10352|1.4e-253|sdu:111236322|K10352 myosin heavy chain 9/10/11/14 | (RefSeq) myosin-9-like	[Z]	Cytoskeleton	Myosin head (motor domain);; Myosin N-terminal SH3-like domain	Myosin-9 OS=Gallus gallus OX=9031 GN=MYH9 PE=2 SV=1	Uncharacterized protein OS=Seriola dumerili OX=41447 PE=3 SV=1	Z	Cytoskeleton	myosin-9-like isoform X1 [Seriola lalandi dorsalis]
c104875.graph_c0	10	81	94	540	2198	276	0.19	1.69	1.73	9.3	37.08	6.4	4.33e-06	3.94805	up	--	--	Cellular Component: integral component of membrane (GO:0016021);;	K04714|2.8e-208|sdu:111233129|K04714 shingomyelin synthase [EC:2.7.8.27] | (RefSeq) phosphatidylcholine:ceramide cholinephosphotransferase 2-like	[S]	Function unknown	PAP2 superfamily C-terminal	Phosphatidylcholine:ceramide cholinephosphotransferase 1 OS=Gallus gallus OX=9031 GN=SGMS1 PE=2 SV=2	PAP2_C domain-containing protein OS=Seriola dumerili OX=41447 PE=3 SV=1	S	Function unknown	phosphatidylcholine:ceramide cholinephosphotransferase 2-like [Seriola dumerili]
c96380.graph_c0	9	36	64	160	931	86	0.26	1.14	1.77	4.12	23.19	2.62	0.000387856	3.29512	up	--	--	Molecular Function: ubiquitin-protein transferase activity (GO:0004842);; Molecular Function: zinc ion binding (GO:0008270);;	K12009|1.6e-175|lco:104928802|K12009 tripartite motif-containing protein 27 [EC:2.3.2.27] | (RefSeq) E3 ubiquitin-protein ligase TRIM38	[O]	Posttranslational modification, protein turnover, chaperones	SPRY domain;; SPRY-associated domain;; RING-type zinc-finger;; Zinc finger, C3HC4 type (RING finger);; B-box zinc finger;; zinc finger of C3HC4-type, RING;; Zinc finger, C3HC4 type (RING finger);; Zinc finger, C3HC4 type (RING finger)	Zinc-binding protein A33 OS=Pleurodeles waltl OX=8319 PE=1 SV=2	Uncharacterized protein OS=Seriola dumerili OX=41447 PE=4 SV=1	O	Posttranslational modification, protein turnover, chaperones	E3 ubiquitin-protein ligase TRIM39-like [Seriola dumerili]
c82605.graph_c0	32	31	33	7	3	1	3.58	3.78	3.54	0.7	0.29	0.12	0.00743711	-2.5455	down	[G]	Carbohydrate transport and metabolism	Molecular Function: 6-phosphofructokinase activity (GO:0003872);; Molecular Function: ATP binding (GO:0005524);; Cellular Component: cytoplasm (GO:0005737);; Biological Process: fructose 6-phosphate metabolic process (GO:0006002);; Molecular Function: metal ion binding (GO:0046872);;	K00850|2.2e-86|sdu:111233862|K00850 6-phosphofructokinase 1 [EC:2.7.1.11] | (RefSeq) ATP-dependent 6-phosphofructokinase, platelet type-like isoform X1	[G]	Carbohydrate transport and metabolism	Phosphofructokinase	--	ATP-dependent 6-phosphofructokinase OS=Seriola dumerili OX=41447 PE=3 SV=1	G	Carbohydrate transport and metabolism	ATP-dependent 6-phosphofructokinase, platelet type-like isoform X2 [Seriola lalandi dorsalis]
c90691.graph_c1	52	267	251	8	17	11	1.6	8.95	7.37	0.22	0.45	0.35	3.35e-06	-3.23556	down	--	--	Molecular Function: actin binding (GO:0003779);; Biological Process: chordate embryonic development (GO:0043009);;	K10314|7.9e-68|bacu:103002192|K10314 F-box protein 39 | (RefSeq) FBXO39; F-box protein 39	[R]	General function prediction only	Calponin homology (CH) domain	Cytospin-A OS=Xenopus tropicalis OX=8364 GN=specc1l PE=2 SV=1	Calponin-homology (CH) domain-containing protein OS=Seriola lalandi dorsalis OX=1841481 PE=4 SV=1	Z	Cytoskeleton	smoothelin-like protein 2 [Seriola lalandi dorsalis]
c96573.graph_c0	4	51	56	194	583	51	0.1	1.37	1.32	4.24	12.34	1.32	0.00394811	2.88056	up	--	--	Biological Process: keratinocyte development (GO:0003334);;	K23346|2.1e-203|sdu:111227803|K23346 keratinocyte differentiation factor 1 | (RefSeq) kdf1; keratinocyte differentiation factor 1	--	--	Domain of unknown function (DUF4656)	--	Uncharacterized protein OS=Seriola lalandi dorsalis OX=1841481 PE=4 SV=1	S	Function unknown	keratinocyte differentiation factor 1-like [Seriola lalandi dorsalis]
c105172.graph_c0	58	484	299	30	34	30	1.68	14.99	9.62	0.87	0.93	0.87	0.00262276	-2.35028	down	--	--	Cellular Component: cytoplasm (GO:0005737);; Molecular Function: superoxide-generating NADPH oxidase activity (GO:0016175);; Molecular Function: phosphatidylinositol binding (GO:0035091);; Biological Process: respiratory burst (GO:0045730);; Biological Process: defense response to fungus (GO:0050832);;	K08011|6.1e-210|sdu:111221330|K08011 neutrophil cytosolic factor 1 | (RefSeq) ncf1; neutrophil cytosol factor 1	[C]	Energy production and conversion	SH3 domain;; Variant SH3 domain;; SH3 terminal domain of 2nd SH3 on Neutrophil cytosol factor 1;; Variant SH3 domain;; NADPH oxidase subunit p47Phox, C terminal domain;; PX domain	SH3 and PX domain-containing protein 2A OS=Danio rerio OX=7955 GN=sh3pxd2a PE=3 SV=2	Uncharacterized protein OS=Seriola dumerili OX=41447 PE=4 SV=1	T	Signal transduction mechanisms	neutrophil cytosol factor 1 isoform X1 [Seriola lalandi dorsalis]
c92932.graph_c0	22	131	135	286	816	139	0.86	5.55	5.01	9.88	27.34	5.68	0.00421376	2.29988	up	--	--	Cellular Component: ubiquitin ligase complex (GO:0000151);; Cellular Component: DNA-directed RNA polymerase complex (GO:0000428);; Molecular Function: molecular_function (GO:0003674);; Molecular Function: transcription coregulator activity (GO:0003712);; Molecular Function: binding (GO:0005488);; Molecular Function: protein binding (GO:0005515);; Cellular Component: cellular_component (GO:0005575…	K15135|1.8e-115|sdu:111235785|K15135 mediator of RNA polymerase II transcription subunit 18 | (RefSeq) med18; mediator of RNA polymerase II transcription subunit 18	[S]	Function unknown	Med18 protein	Mediator of RNA polymerase II transcription subunit 18 OS=Danio rerio OX=7955 GN=med18 PE=2 SV=1	Mediator of RNA polymerase II transcription subunit 18 OS=Echeneis naucrates OX=173247 GN=med18 PE=3 SV=1	K	Transcription	mediator of RNA polymerase II transcription subunit 18 isoform X1 [Hippoglossus hippoglossus]
c99217.graph_c0	14	29	32	266	396	22	0.48	1.52	1.6	9.04	12.98	0.88	0.000918118	3.07897	up	--	--	Cellular Component: integral component of membrane (GO:0016021);;	K05146|1.4e-93|sdu:111235018|K05146 tumor necrosis factor receptor superfamily member 9 | (RefSeq) tumor necrosis factor receptor superfamily member 9-like	--	--	TNFR/NGFR cysteine-rich region	--	TNFR-Cys domain-containing protein OS=Seriola dumerili OX=41447 PE=4 SV=1	T	Signal transduction mechanisms	tumor necrosis factor receptor superfamily member 9-like [Seriola dumerili]
c95047.graph_c2	19	32	43	2	5	4	2.67	5.03	5.82	0.26	0.78	0.59	0.00262599	-2.47497	down	--	--	Molecular Function: DNA-binding transcription factor activity, RNA polymerase II-specific (GO:0000981);; Molecular Function: molecular_function (GO:0003674);; Molecular Function: nucleic acid binding (GO:0003676);; Molecular Function: DNA binding (GO:0003677);; Molecular Function: DNA-binding transcription factor activity (GO:0003700);; Molecular Function: binding (GO:0005488);; Cellular Componen…	--	--	--	Zinc-finger double domain;; Zinc finger, C2H2 type;; C2H2-type zinc finger;; Zinc-finger double-stranded RNA-binding;; Zinc-finger of C2H2 type	--	Chromosome undetermined SCAF10684, whole genome shotgun sequence OS=Tetraodon nigroviridis OX=99883 GN=GSTENG00008910001 PE=4 SV=1	S	Function unknown	unnamed protein product [Tetraodon nigroviridis]
c92095.graph_c0	107	55	20	7	2	2	3.19	1.88	0.55	0.18	0.06	0.06	0.00304169	-3.31904	down	--	--	Biological Process: system process (GO:0003008);; Biological Process: muscle system process (GO:0003012);; Molecular Function: molecular_function (GO:0003674);; Molecular Function: actin binding (GO:0003779);; Molecular Function: structural molecule activity (GO:0005198);; Molecular Function: binding (GO:0005488);; Molecular Function: protein binding (GO:0005515);; Cellular Component: cellular_co…	K12558|5.6e-141|eee:113589170|K12558 myosin-binding protein C, fast-type | (RefSeq) myosin-binding protein C, fast-type-like	--	--	Immunoglobulin I-set domain;; Fibronectin type III domain;; Immunoglobulin domain;; Immunoglobulin domain;; Immunoglobulin domain;; Immunoglobulin V-set domain;; CD80-like C2-set immunoglobulin domain	Myosin-binding protein H OS=Gallus gallus OX=9031 GN=MYBPH PE=1 SV=1	Myosin binding protein Ha OS=Lates calcarifer OX=8187 PE=4 SV=1	T	Signal transduction mechanisms	myosin-binding protein H-like [Seriola dumerili]
c98836.graph_c0	1	23	40	3312	9386	1176	0.05	0.81	1.11	105.33	291.29	47.64	1.37e-15	7.12321	up	--	--	Cellular Component: stress fiber (GO:0001725);; Molecular Function: molecular_function (GO:0003674);; Molecular Function: actin binding (GO:0003779);; Molecular Function: signaling receptor binding (GO:0005102);; Molecular Function: binding (GO:0005488);; Molecular Function: protein binding (GO:0005515);; Cellular Component: cellular_component (GO:0005575);; Cellular Component: intracellular (GO:…	K17551|1.9e-230|sdu:111228920|K17551 neurabin | (RefSeq) neurabin-2-like	[T]	Signal transduction mechanisms	SAM domain (Sterile alpha motif);; SAM domain (Sterile alpha motif)	--	Uncharacterized protein OS=Seriola dumerili OX=41447 PE=4 SV=1	T	Signal transduction mechanisms	neurabin-1-like isoform X3 [Seriola lalandi dorsalis]
c92121.graph_c1	28	306	137	14	17	8	1.23	14.59	5.72	0.54	0.64	0.37	0.0011532	-2.76824	down	--	--	--	K24173|2.4e-90|tru:101076904|K24173 MPN domain-containing protein | (RefSeq) mpnd; MPN domain-containing protein	[O]	Posttranslational modification, protein turnover, chaperones	--	MPN domain-containing protein OS=Danio rerio OX=7955 GN=mpnd PE=2 SV=1	MPN domain-containing protein OS=Echeneis naucrates OX=173247 GN=mpnd PE=4 SV=1	O	Posttranslational modification, protein turnover, chaperones	MPN domain-containing protein [Echeneis naucrates]
c105668.graph_c0	130	441	364	800	1860	468	1.57	7.62	5.24	8.61	18.89	5.84	0.000603265	2.014	up	[S]	Function unknown	Biological Process: isoprenoid biosynthetic process (GO:0008299);;	K12504|4.4e-224|sdu:111224334|K12504 decaprenyl-diphosphate synthase subunit 1 [EC:2.5.1.91] | (RefSeq) pdss1; decaprenyl-diphosphate synthase subunit 1 isoform X1	[H]	Coenzyme transport and metabolism	Uncharacterized ACR, YdiU/UPF0061 family;; Polyprenyl synthetase;; Uncharacterized ACR, YdiU/UPF0061 family	Protein adenylyltransferase SelO-1, mitochondrial OS=Danio rerio OX=7955 GN=selenoo1 PE=3 SV=2	Selenoprotein O OS=Sparus aurata OX=8175 GN=LOC115570212 PE=3 SV=1	S	Function unknown	PREDICTED: LOW QUALITY PROTEIN: uncharacterized protein LOC108899996 [Lates calcarifer]
c106564.graph_c2	8	8	10	39	130	33	0.16	0.17	0.18	0.67	2.16	0.67	6.06e-05	2.93992	up	--	--	Biological Process: organelle organization (GO:0006996);; Biological Process: multicellular organism development (GO:0007275);; Biological Process: determination of left/right symmetry (GO:0007368);; Biological Process: pattern specification process (GO:0007389);; Biological Process: sensory organ development (GO:0007423);; Biological Process: heart development (GO:0007507);; Biological Process: …	--	[S]	Function unknown	Protein of unknown function (DUF3808);; Cohesin loading factor	Tetratricopeptide repeat protein 39C OS=Danio rerio OX=7955 GN=ttc39c PE=2 SV=1	Uncharacterized protein OS=Seriola dumerili OX=41447 PE=3 SV=1	S	Function unknown	tetratricopeptide repeat protein 39C-like, partial [Seriola lalandi dorsalis]
c99662.graph_c0	0	0	6	153	46	48	0	0	0.22	4.81	7.83	1.93	1.96e-05	4.84608	up	--	--	Molecular Function: protein binding (GO:0005515);; Molecular Function: zinc ion binding (GO:0008270);;	K12006|1.1e-33|els:105018650|K12006 tripartite motif-containing protein 16 | (RefSeq) tripartite motif-containing protein 16-like isoform X1	[O]	Posttranslational modification, protein turnover, chaperones	zinc finger of C3HC4-type, RING;; RING-type zinc-finger;; Zinc finger, C3HC4 type (RING finger);; Zinc finger, C3HC4 type (RING finger);; Zinc finger, C3HC4 type (RING finger)	Stonustoxin subunit alpha OS=Synanceia horrida OX=13279 PE=1 SV=3	Uncharacterized protein OS=Lates calcarifer OX=8187 GN=LOC108890940 PE=4 SV=1	O	Posttranslational modification, protein turnover, chaperones	tripartite motif-containing protein 47-like [Seriola lalandi dorsalis]
c91006.graph_c0	10	57	15	119	490	43	0.52	2.7	0.62	3.82	17.12	1.64	0.00245345	2.89102	up	[G]	Carbohydrate transport and metabolism	Cellular Component: cellular_component (GO:0005575);; Cellular Component: membrane (GO:0016020);; Cellular Component: integral component of membrane (GO:0016021);; Molecular Function: transmembrane transporter activity (GO:0022857);; Cellular Component: intrinsic component of membrane (GO:0031224);; Cellular Component: obsolete membrane part (GO:0044425);; Biological Process: transmembrane transp…	K08202|4.8e-29|salp:111950340|K08202 MFS transporter, OCT family, solute carrier family 22 (organic cation transporter), member 4/5 | (RefSeq) solute carrier family 22 member 5	[R]	General function prediction only	Major Facilitator Superfamily;; Sugar (and other) transporter	Putative transporter SVOPL OS=Danio rerio OX=7955 GN=svopl PE=2 SV=1	Putative transporter SVOPL SVOP-like protein OS=Channa argus OX=215402 GN=EXN66_Car021081 PE=4 SV=1	S	Function unknown	putative transporter SVOPL isoform X1 [Seriola dumerili]
c100546.graph_c0	46	165	171	18	12	10	1.87	7.14	7.98	0.58	0.59	0.37	0.000197024	-2.55241	down	--	--	--	--	--	--	Lectin C-type domain	--	C-type lectin domain-containing protein OS=Seriola dumerili OX=41447 PE=4 SV=1	--	--	uncharacterized protein LOC111239724 isoform X2 [Seriola dumerili]
c96393.graph_c2	72	106	135	266	904	108	1.28	3.71	3.89	4.91	13.89	2.21	0.00944106	2.03186	up	--	--	Molecular Function: actin binding (GO:0003779);; Molecular Function: protein phosphatase inhibitor activity (GO:0004864);; Molecular Function: protein phosphatase 1 binding (GO:0008157);;	K17585|1.3e-187|lcf:108889905|K17585 phosphatase and actin regulator 4 | (RefSeq) phactr4; phosphatase and actin regulator 4 isoform X1	[R]	General function prediction only	RPEL repeat	Phosphatase and actin regulator 4B OS=Danio rerio OX=7955 GN=phactr4b PE=1 SV=2	Phosphatase and actin regulator OS=Lates calcarifer OX=8187 PE=3 SV=1	S	Function unknown	PREDICTED: phosphatase and actin regulator 4 isoform X6 [Lates calcarifer]
c103496.graph_c0	20	462	457	18	20	19	1.21	15.59	12.14	0.74	0.68	0.94	0.0031611	-2.94544	down	--	--	Biological Process: exocytosis (GO:0006887);; Cellular Component: integral component of membrane (GO:0016021);;	K19328|2.6e-275|sdu:111225826|K19328 synaptotagmin-14/16 | (RefSeq) syt16; synaptotagmin-16	[TU]	--	C2 domain	Synaptotagmin-B OS=Diplobatis ommata OX=1870830 GN=P65-B PE=1 SV=1	Uncharacterized protein OS=Seriola lalandi dorsalis OX=1841481 GN=SYT16 PE=4 SV=1	--	--	synaptotagmin-16 isoform X2 [Seriola lalandi dorsalis]
c100526.graph_c2	25	10171	14063	20	7	15	0.24	103.66	124.69	0.15	0.06	0.15	1.56e-07	-6.265	down	--	--	Biological Process: microtubule cytoskeleton organization (GO:0000226);; Biological Process: microtubule bundle formation (GO:0001578);; Biological Process: cilium movement (GO:0003341);; Biological Process: regulation of cilium movement (GO:0003352);; Biological Process: regulation of cilium beat frequency (GO:0003356);; Cellular Component: cellular_component (GO:0005575);; Cellular Component: i…	K24125|0.0e+00|sdu:111228246|K24125 armadillo repeat-containing protein 4 | (RefSeq) armc4; armadillo repeat-containing protein 4	[S]	Function unknown	Armadillo/beta-catenin-like repeat;; HEAT repeats;; HEAT-like repeat;; Armadillo-like;; V-ATPase subunit H	--	Uncharacterized protein OS=Seriola dumerili OX=41447 PE=4 SV=1	S	Function unknown	armadillo repeat-containing protein 4 isoform X1 [Echeneis naucrates]
c95444.graph_c0	441	4116	4765	356	581	290	4.46	45.94	45.72	3.21	5.07	3.1	0.00828564	-2.1796	down	--	--	Biological Process: reproduction (GO:0000003);; Biological Process: mitotic sister chromatid segregation (GO:0000070);; Biological Process: negative regulation of transcription by RNA polymerase II (GO:0000122);; Biological Process: mitotic cell cycle (GO:0000278);; Biological Process: nuclear division (GO:0000280);; Cellular Component: DNA-directed RNA polymerase complex (GO:0000428);; Cellular …	K06672|0.0e+00|sdu:111230922|K06672 cohesin loading factor subunit SCC2 | (RefSeq) nipbl; nipped-B-like protein	[BDL]	--	HEAT repeat associated with sister chromatid cohesion	Nipped-B-like protein B OS=Danio rerio OX=7955 GN=nipblb PE=2 SV=1	Nipped-B-like protein Delangin SCC2-like protein OS=Larimichthys crocea OX=215358 GN=D5F01_LYC09466 PE=4 SV=1	K	Transcription	PREDICTED: nipped-B-like protein A isoform X4 [Stegastes partitus]
c105010.graph_c0	4	415	583	11	32	4	0.08	8.81	11.41	0.2	0.56	0.09	0.00900013	-3.22369	down	--	--	--	--	--	--	--	--	Uncharacterized protein OS=Seriola dumerili OX=41447 PE=4 SV=1	S	Function unknown	coiled-coil domain-containing protein 191 [Seriola dumerili]
c101287.graph_c0	1	2231	1614	25	28	8	0.02	36.3	27.67	0.34	0.42	0.24	0.00255769	-4.01447	down	--	--	--	K17493|9.5e-71|ccar:109056850|K17493 calmodulin-regulated spectrin-associated protein | (RefSeq) calmodulin-regulated spectrin-associated protein 2-like	--	--	Fibronectin type III domain;; Purple acid Phosphatase, N-terminal domain;; Interferon-alpha/beta receptor, fibronectin type III	--	Uncharacterized protein OS=Seriola lalandi dorsalis OX=1841481 PE=4 SV=1	W	Extracellular structures	PREDICTED: mucin-5B-like isoform X2 [Lates calcarifer]
c88993.graph_c1	23	273	73	10	19	5	0.89	4.97	1.11	0.27	0.25	0.14	0.00519978	-2.6491	down	[X]	Mobilome: prophages, transposons	Molecular Function: nucleic acid binding (GO:0003676);; Biological Process: DNA integration (GO:0015074);;	K06065|2.2e-220|xma:102225078|K06065 nuclear receptor co-repressor 2 | (RefSeq) uncharacterized protein LOC102225078	--	--	RNase H-like domain found in reverse transcriptase;; Reverse transcriptase (RNA-dependent DNA polymerase);; RNase H-like domain found in reverse transcriptase;; Integrase zinc binding domain;; Integrase core domain;; PNMA;; Zinc knuckle	--	Uncharacterized protein OS=Pygocentrus nattereri OX=42514 PE=3 SV=1	L	Replication, recombination and repair	uncharacterized protein LOC114911105 [Scleropages formosus]
c100331.graph_c0	1	18	16	2609	8641	861	0.02	0.38	0.29	44.31	142.03	17.35	1.02e-20	7.78375	up	--	--	Biological Process: deadenylation-dependent decapping of nuclear-transcribed mRNA (GO:0000290);;	K12617|0.0e+00|lcf:108890427|K12617 DNA topoisomerase 2-associated protein PAT1 | (RefSeq) patl2; LOW QUALITY PROTEIN: protein PAT1 homolog 2	--	--	Topoisomerase II-associated protein PAT1	Protein PAT1 homolog 2 OS=Xenopus laevis OX=8355 GN=patl2 PE=1 SV=1	PAT1 domain-containing protein OS=Seriola dumerili OX=41447 PE=3 SV=1	S	Function unknown	protein PAT1 homolog 2 isoform X2 [Seriola lalandi dorsalis]
c99420.graph_c0	292	116	40	1	5	4	9.74	4.21	1.27	0.03	0.14	0.14	2.54e-05	-4.57526	down	[R]	General function prediction only	Molecular Function: calcium:sodium antiporter activity (GO:0005432);; Biological Process: cellular calcium ion homeostasis (GO:0006874);; Biological Process: cell communication (GO:0007154);; Biological Process: regulation of heart contraction (GO:0008016);; Cellular Component: integral component of membrane (GO:0016021);; Biological Process: sarcomere organization (GO:0045214);;	K05849|0.0e+00|sdu:111237558|K05849 solute carrier family 8 (sodium/calcium exchanger) | (RefSeq) sodium/calcium exchanger 1-like isoform X1	[PT]	--	Calx-beta domain;; C-terminal extension of sodium/calcium exchanger domain;; Sodium/calcium exchanger protein	Adhesion G-protein coupled receptor V1 OS=Danio rerio OX=7955 GN=adgrv1 PE=2 SV=1	Uncharacterized protein OS=Amphiprion ocellaris OX=80972 PE=3 SV=1	--	--	sodium/calcium exchanger 1-like isoform X1 [Seriola dumerili]
c103303.graph_c1	0	107	160	1626	5332	567	0	5.18	7.08	37.63	115.32	15.42	0.00122981	4.07902	up	--	--	Biological Process: dorsal/ventral pattern formation (GO:0009953);; Biological Process: positive regulation of canonical Wnt signaling pathway (GO:0090263);; Biological Process: positive regulation of Wnt signaling pathway involved in dorsal/ventral axis specification (GO:2000055);;	K18744|0.0e+00|lcf:108897513|K18744 caprin-2 | (RefSeq) caprin2; caprin-2 isoform X1	--	--	Caprin-1 dimerization domain;; Cytoplasmic activation/proliferation-associated protein-1 C term;; C1q domain	Caprin-2 OS=Danio rerio OX=7955 GN=caprin2 PE=1 SV=1	C1q domain-containing protein OS=Lates calcarifer OX=8187 GN=caprin2 PE=3 SV=1	S	Function unknown	PREDICTED: caprin-2 isoform X1 [Lates calcarifer]
c94239.graph_c0	69	21	20	162	774	163	2.45	0.81	0.7	5.94	28.22	6.86	0.00705877	2.75363	up	--	--	Molecular Function: motor activity (GO:0003774);; Molecular Function: actin binding (GO:0003779);; Molecular Function: ATP binding (GO:0005524);; Cellular Component: myosin complex (GO:0016459);; Biological Process: cranial skeletal system development (GO:1904888);;	K10356|1.8e-225|sdu:111234171|K10356 myosin I | (RefSeq) unconventional myosin-Ih-like	[Z]	Cytoskeleton	Unconventional myosin tail, actin- and lipid-binding;; Myosin head (motor domain)	Unconventional myosin-Ic OS=Lithobates catesbeianus OX=8400 GN=Myo1c PE=2 SV=1	Uncharacterized protein OS=Seriola lalandi dorsalis OX=1841481 PE=3 SV=1	Z	Cytoskeleton	unconventional myosin-Ih-like [Seriola dumerili]
c98575.graph_c0	3	28	44	367	1362	130	0.04	0.44	0.59	4.59	16.51	1.93	1.63e-06	4.3992	up	--	--	Biological Process: lipid transport (GO:0006869);;	K20174|0.0e+00|sdu:111238976|K20174 oxysterol-binding protein-related protein 1/2 | (RefSeq) oxysterol-binding protein-related protein 1-like	[T]	Signal transduction mechanisms	Oxysterol-binding protein;; Ankyrin repeats (many copies);; Ankyrin repeat;; Ankyrin repeats (3 copies);; Ankyrin repeats (many copies);; Ankyrin repeat	Oxysterol-binding protein-related protein 9 OS=Xenopus tropicalis OX=8364 GN=osbpl9 PE=2 SV=1	Oxysterol-binding protein OS=Seriola dumerili OX=41447 PE=3 SV=1	T	Signal transduction mechanisms	oxysterol-binding protein-related protein 1-like [Seriola dumerili]
c95776.graph_c1	468	400	85	16	36	39	27.29	24.28	4.4	0.73	1.58	2.2	0.00539738	-2.80514	down	--	--	Biological Process: heart morphogenesis (GO:0003007);; Biological Process: JNK cascade (GO:0007254);; Biological Process: Wnt signaling pathway (GO:0016055);; Biological Process: neuron projection regeneration (GO:0031102);; Biological Process: cell migration involved in gastrulation (GO:0042074);; Molecular Function: metal ion binding (GO:0046872);; Biological Process: convergent extension invol…	K09377|8.0e-114|sdu:111218954|K09377 cysteine and glycine-rich protein | (RefSeq) cysteine and glycine-rich protein 1-like	[TZ]	--	LIM domain	Cysteine and glycine-rich protein 1 OS=Gallus gallus OX=9031 GN=CSRP1 PE=1 SV=2	Uncharacterized protein OS=Seriola dumerili OX=41447 PE=4 SV=1	--	--	cysteine and glycine-rich protein 1-like [Seriola dumerili]
c105459.graph_c0	294	1751	4300	32	20	7	4.47	28.98	62.23	0.43	0.26	0.11	2.93e-10	-5.48586	down	--	--	Biological Process: telomere maintenance (GO:0000723);; Molecular Function: DNA helicase activity (GO:0003678);; Molecular Function: ATP binding (GO:0005524);; Biological Process: DNA repair (GO:0006281);; Biological Process: DNA recombination (GO:0006310);;	K15255|2.7e-141|mze:112433706|K15255 ATP-dependent DNA helicase PIF1 [EC:3.6.4.12] | (RefSeq) uncharacterized protein LOC112433706	[D]	Cell cycle control, cell division, chromosome partitioning	Helitron helicase-like domain at N-terminus	--	ATP-dependent DNA helicase OS=Gasterosteus aculeatus OX=69293 PE=3 SV=1	L	Replication, recombination and repair	uncharacterized protein LOC109202971 [Oreochromis niloticus]
c94497.graph_c0	29	4141	4814	7	33	5	1.15	166.78	169.77	0.24	1.03	0.2	4.58e-07	-5.7386	down	--	--	--	--	--	--	RIB43A	--	Uncharacterized protein OS=Seriola dumerili OX=41447 PE=3 SV=1	S	Function unknown	RIB43A-like with coiled-coils protein 1 [Seriola dumerili]
c95940.graph_c0	64	368	715	19	23	15	2.48	16.99	28.3	0.76	0.8	0.67	2.32e-05	-3.42856	down	--	--	Cellular Component: chromosome, centromeric region (GO:0000775);; Cellular Component: kinetochore (GO:0000776);; Molecular Function: molecular_function (GO:0003674);; Molecular Function: actin binding (GO:0003779);; Molecular Function: binding (GO:0005488);; Molecular Function: protein binding (GO:0005515);; Cellular Component: cellular_component (GO:0005575);; Cellular Component: intracellular (…	K10421|1.5e-158|sdu:111217848|K10421 CAP-Gly domain-containing linker protein 1 | (RefSeq) CAP-Gly domain-containing linker protein 1-like isoform X1	[ZR]	--	CAP-Gly domain	CAP-Gly domain-containing linker protein 1 OS=Gallus gallus OX=9031 GN=CLIP1 PE=2 SV=1	Uncharacterized protein OS=Lates calcarifer OX=8187 GN=LOC108897383 PE=4 SV=1	D	Cell cycle control, cell division, chromosome partitioning	CAP-Gly domain-containing linker protein 1-like isoform X1 [Seriola dumerili]
c103109.graph_c1	413	1537	1396	2691	7219	1110	16.59	66.18	53.27	53.96	140.12	26.39	0.00945947	1.9137	up	--	--	Molecular Function: mRNA binding (GO:0003729);;	K18710|6.2e-145|sdu:111239506|K18710 histone RNA hairpin-binding protein | (RefSeq) oocyte-specific histone RNA stem-loop-binding protein 2-like	[R]	General function prediction only	Histone RNA hairpin-binding protein RNA-binding domain;; Zinc-finger double-stranded RNA-binding;; Zinc-finger of C2H2 type;; U1 zinc finger	Oocyte-specific histone RNA stem-loop-binding protein 2 OS=Xenopus laevis OX=8355 GN=slbp2 PE=2 SV=1	SLBP_RNA_bind domain-containing protein OS=Seriola dumerili OX=41447 PE=3 SV=1	A	RNA processing and modification	oocyte-specific histone RNA stem-loop-binding protein 2-like [Seriola lalandi dorsalis]
c107712.graph_c3	37	249	444	26	35	16	2.49	18.26	28.54	1.56	2.04	1.13	0.00404201	-2.46698	down	--	--	Cellular Component: integral component of membrane (GO:0016021);;	K17795|1.1e-89|lcf:108882182|K17795 mitochondrial import inner membrane translocase subunit TIM17 | (RefSeq) timm17b; mitochondrial import inner membrane translocase subunit Tim17-B isoform X1	[U]	Intracellular trafficking, secretion, and vesicular transport	Tim17/Tim22/Tim23/Pmp24 family	--	Uncharacterized protein OS=Lates calcarifer OX=8187 GN=timm17b PE=4 SV=1	U	Intracellular trafficking, secretion, and vesicular transport	PREDICTED: mitochondrial import inner membrane translocase subunit Tim17-B isoform X1 [Lates calcarifer]
c98273.graph_c0	0	4	4	4749	13471	1944	0	0.08	0.07	74.34	204.1	36.11	8.17e-41	10.357	up	--	--	Molecular Function: DNA-binding transcription factor activity (GO:0003700);; Cellular Component: nucleus (GO:0005634);; Molecular Function: sequence-specific DNA binding (GO:0043565);;	K09367|3.2e-247|sdu:111238932|K09367 POU domain transcription factor, class 5 | (RefSeq) POU domain, class 5, transcription factor 1-like	[K]	Transcription	Pou domain - N-terminal to homeobox domain;; Homeodomain	POU domain, class 5, transcription factor 1 OS=Danio rerio OX=7955 GN=pou5f1 PE=2 SV=1	POU domain protein OS=Seriola dumerili OX=41447 PE=3 SV=1	K	Transcription	POU domain, class 5, transcription factor 1-like [Seriola dumerili]
c107887.graph_c0	4	37	36	100	413	41	0.11	1.14	0.97	2.5	10	1.22	0.00294869	2.83193	up	--	--	Molecular Function: protein dimerization activity (GO:0046983);;	--	--	--	hAT family C-terminal dimerisation region	--	Dimer_Tnp_hAT domain-containing protein OS=Lates calcarifer OX=8187 GN=LOC108889446 PE=4 SV=1	L	Replication, recombination and repair	zinc finger BED domain-containing protein 4-like [Seriola dumerili]
c88269.graph_c0	1	1	0	1260	4477	628	0.09	0.1	0	104.23	359.04	60.94	9.67e-29	9.75823	up	[M]	Cell wall/membrane/envelope biogenesis	Biological Process: lipid transport (GO:0006869);; Biological Process: aging (GO:0007568);; Molecular Function: lipid binding (GO:0008289);;	K03098|5.0e-95|lcf:108884155|K03098 apolipoprotein D and lipocalin family protein | (RefSeq) apolipoprotein D-like	[M]	Cell wall/membrane/envelope biogenesis	Lipocalin-like domain;; Lipocalin / cytosolic fatty-acid binding protein family	--	Apolipoprotein D OS=Seriola dumerili OX=41447 PE=3 SV=1	M	Cell wall/membrane/envelope biogenesis	PREDICTED: apolipoprotein D-like [Lates calcarifer]
c82658.graph_c0	237	203	172	1808	3333	727	8.11	7.56	5.61	54.86	97.95	26.11	5.03e-06	3.14828	up	[R]	General function prediction only	Biological Process: response to hypoxia (GO:0001666);; Molecular Function: molecular_function (GO:0003674);; Molecular Function: binding (GO:0005488);; Molecular Function: protein binding (GO:0005515);; Cellular Component: cellular_component (GO:0005575);; Cellular Component: intracellular (GO:0005622);; Cellular Component: obsolete cell (GO:0005623);; Cellular Component: cytoplasm (GO:0005737);;…	K23325|1.7e-234|lcf:108894029|K23325 transducin beta-like protein 2 | (RefSeq) tbl2; transducin beta-like protein 2	[R]	General function prediction only	WD domain, G-beta repeat;; Anaphase-promoting complex subunit 4 WD40 domain;; Eukaryotic translation initiation factor eIF2A	--	WD_REPEATS_REGION domain-containing protein OS=Lates calcarifer OX=8187 GN=tbl2 PE=4 SV=1	S	Function unknown	PREDICTED: transducin beta-like protein 2 [Lates calcarifer]
c98996.graph_c1	67	3810	4765	88	267	51	0.96	59.27	64.84	1.11	3.27	0.77	0.00306456	-3.33333	down	--	--	--	K10350|0.0e+00|sdu:111228900|K10350 Zyg-11 protein homolog | (RefSeq) protein zyg-11 homolog	[R]	General function prediction only	--	Protein zyg-11 homolog OS=Danio rerio OX=7955 GN=zyg11 PE=2 SV=1	Uncharacterized protein OS=Seriola dumerili OX=41447 PE=4 SV=1	S	Function unknown	protein zyg-11 homolog [Seriola dumerili]
c98706.graph_c1	175	406	421	1161	2843	565	3.97	9.04	9.38	21.02	49.79	14.52	6.98e-05	2.36571	up	[J]	Translation, ribosomal structure and biogenesis	Molecular Function: RNA binding (GO:0003723);; Molecular Function: tRNA (cytosine-5-)-methyltransferase activity (GO:0016428);;	K15335|0.0e+00|sdu:111233168|K15335 tRNA (cytosine34-C5)-methyltransferase [EC:2.1.1.203] | (RefSeq) nsun2; tRNA (cytosine(34)-C(5))-methyltransferase	[J]	Translation, ribosomal structure and biogenesis	16S rRNA methyltransferase RsmB/F	RNA cytosine-C(5)-methyltransferase NSUN2 OS=Xenopus tropicalis OX=8364 GN=nsun2 PE=2 SV=1	NOL1/NOP2/Sun domain family member 2 OS=Seriola dumerili OX=41447 PE=3 SV=1	J	Translation, ribosomal structure and biogenesis	tRNA (cytosine(34)-C(5))-methyltransferase [Seriola dumerili]
c101170.graph_c3	96	2313	2268	60	86	49	2.86	75.39	63.61	1.56	2.16	1.51	0.000195323	-3.51564	down	--	--	Cellular Component: ubiquitin ligase complex (GO:0000151);; Molecular Function: protein binding (GO:0005515);; Cellular Component: cellular_component (GO:0005575);; Cellular Component: intracellular (GO:0005622);; Cellular Component: obsolete cell (GO:0005623);; Cellular Component: nucleus (GO:0005634);; Cellular Component: nucleoplasm (GO:0005654);; Biological Process: cellular protein modificat…	K11802|1.1e-219|lcf:108876615|K11802 DDB1- and CUL4-associated factor 10 | (RefSeq) dcaf10; LOW QUALITY PROTEIN: DDB1- and CUL4-associated factor 10	[R]	General function prediction only	--	DDB1- and CUL4-associated factor 10 OS=Danio rerio OX=7955 GN=dcaf10 PE=2 SV=2	DDB1- and CUL4-associated factor 10 OS=Echeneis naucrates OX=173247 PE=3 SV=1	K	Transcription	PREDICTED: LOW QUALITY PROTEIN: DDB1- and CUL4-associated factor 10 [Lates calcarifer]
c91036.graph_c0	53	119	103	254	585	129	5.06	12.39	9.41	21.76	48.58	12.96	0.000638738	2.01089	up	--	--	Biological Process: maturation of SSU-rRNA from tricistronic rRNA transcript (SSU-rRNA, 5.8S rRNA, LSU-rRNA) (GO:0000462);; Cellular Component: cellular_component (GO:0005575);; Cellular Component: intracellular (GO:0005622);; Cellular Component: obsolete cell (GO:0005623);; Cellular Component: nucleus (GO:0005634);; Cellular Component: nucleoplasm (GO:0005654);; Cellular Component: nucleolus (GO…	K14767|3.2e-70|sdu:111224028|K14767 U3 small nucleolar RNA-associated protein 3 | (RefSeq) utp3; something about silencing protein 10	--	--	--	--	Sas10 domain-containing protein OS=Seriola dumerili OX=41447 PE=3 SV=1	B	Chromatin structure and dynamics	something about silencing protein 10 [Seriola dumerili]
c103604.graph_c0	142	228	319	48	69	47	3.53	6.17	7.55	1.06	1.47	1.23	0.00199789	-1.60037	down	--	--	Cellular Component: extracellular region (GO:0005576);;	K22020|1.3e-263|mze:101484881|K22020 mucin-19 | (RefSeq) mucin-19	[WV]	--	von Willebrand factor type D domain;; C8 domain	Mucin-5B OS=Gallus gallus OX=9031 GN=MUC5B PE=1 SV=1	Putative mucin-19-like isoform 3 OS=Scophthalmus maximus OX=52904 GN=SMAX5B_005481 PE=4 SV=1	--	--	mucin-5B-like [Seriola lalandi dorsalis]
c105014.graph_c2	282	7637	9972	428	815	186	4.96	135.83	154.96	6.47	11.64	3.52	0.00906096	-2.74472	down	--	--	Cellular Component: centrosome (GO:0005813);; Biological Process: microtubule anchoring at centrosome (GO:0034454);; Biological Process: cilium assembly (GO:0060271);; Biological Process: protein localization to centrosome (GO:0071539);;	K16537|0.0e+00|sdu:111216722|K16537 pericentriolar material 1 protein | (RefSeq) pcm1; pericentriolar material 1 protein	--	--	Pericentriolar material 1 C terminus	Pericentriolar material 1 protein OS=Gallus gallus OX=9031 GN=PCM1 PE=2 SV=1	PCM1_C domain-containing protein OS=Seriola lalandi dorsalis OX=1841481 PE=4 SV=1	S	Function unknown	pericentriolar material 1 protein isoform X3 [Seriola lalandi dorsalis]
c91135.graph_c0	123	68	67	352	729	213	14.01	8.51	7.42	36.11	72.57	25.63	0.00685805	2.18559	up	--	--	Cellular Component: cellular_component (GO:0005575);; Cellular Component: intracellular (GO:0005622);; Cellular Component: obsolete cell (GO:0005623);; Cellular Component: cytoplasm (GO:0005737);; Cellular Component: mitochondrion (GO:0005739);; Biological Process: organelle organization (GO:0006996);; Biological Process: mitochondrion organization (GO:0007005);; Biological Process: biological_pr…	K18178|2.2e-38|sdu:111218148|K18178 cytochrome c oxidase assembly factor 5 | (RefSeq) cytochrome c oxidase assembly factor 5	[O]	Posttranslational modification, protein turnover, chaperones	Cytochrome c oxidase assembly protein PET191	Cytochrome c oxidase assembly factor 5 OS=Danio rerio OX=7955 GN=coa5 PE=3 SV=1	Cytochrome c oxidase assembly factor 5 OS=Echeneis naucrates OX=173247 GN=LOC115061828 PE=3 SV=1	O	Posttranslational modification, protein turnover, chaperones	cytochrome c oxidase assembly factor 5 [Echeneis naucrates]
c104860.graph_c0	93	4197	4124	97	201	76	5.88	119.34	108.4	4.78	7.84	4.67	0.00116341	-3.39417	down	[C]	Energy production and conversion	Molecular Function: symporter activity (GO:0015293);; Cellular Component: integral component of membrane (GO:0016021);;	K05613|1.1e-223|mze:101484334|K05613 solute carrier family 1 (glial high affinity glutamate transporter), member 2 | (RefSeq) excitatory amino acid transporter 2	[E]	Amino acid transport and metabolism	Sodium:dicarboxylate symporter family	Excitatory amino acid transporter 1 OS=Ambystoma tigrinum OX=8305 GN=SLC1A3 PE=1 SV=1	Amino acid transporter OS=Stegastes partitus OX=144197 PE=3 SV=1	E	Amino acid transport and metabolism	PREDICTED: excitatory amino acid transporter 2-like [Stegastes partitus]
c92139.graph_c0	135	515	657	68	35	49	8.55	35.53	39.74	3.84	1.92	3.26	0.00245345	-2.2948	down	[C]	Energy production and conversion	Biological Process: cellular aldehyde metabolic process (GO:0006081);; Molecular Function: oxidoreductase activity, acting on the aldehyde or oxo group of donors, NAD or NADP as acceptor (GO:0016620);;	K00128|2.6e-102|sdu:111226283|K00128 aldehyde dehydrogenase (NAD+) [EC:1.2.1.3] | (RefSeq) fatty aldehyde dehydrogenase-like	[C]	Energy production and conversion	Aldehyde dehydrogenase family	4-trimethylaminobutyraldehyde dehydrogenase B OS=Danio rerio OX=7955 GN=aldh9a1b PE=2 SV=2	Aldehyde dehydrogenase OS=Seriola dumerili OX=41447 PE=3 SV=1	C	Energy production and conversion	fatty aldehyde dehydrogenase-like [Seriola dumerili]
c85356.graph_c0	1	20	10	175	392	73	0.02	0.52	0.21	8.13	17.13	3.38	1.35e-07	4.34473	up	--	--	Cellular Component: integral component of membrane (GO:0016021);; Biological Process: myelination (GO:0042552);;	K17271|4.0e-131|sdu:111226590|K17271 myelin proteolipid protein | (RefSeq) myelin proteolipid protein-like	[X]	--	Myelin proteolipid protein (PLP or lipophilin)	Myelin proteolipid protein OS=Oncorhynchus mykiss OX=8022 GN=plp PE=2 SV=1	Uncharacterized protein OS=Seriola lalandi dorsalis OX=1841481 PE=3 SV=1	S	Function unknown	myelin proteolipid protein-like [Seriola lalandi dorsalis]
c80620.graph_c0	167	221	286	1114	3919	421	14.73	21.26	24.14	88.14	300.37	39.11	0.000137492	2.91128	up	--	--	Cellular Component: nucleus (GO:0005634);; Cellular Component: cytoplasm (GO:0005737);; Biological Process: apoptotic process (GO:0006915);; Molecular Function: metal ion binding (GO:0046872);;	K22744|2.1e-64|sdu:111225882|K22744 apoptosis regulatory protein Siva | (RefSeq) siva1; apoptosis regulatory protein Siva	--	--	Cd27 binding protein (Siva)	--	Apoptosis regulatory protein Siva OS=Seriola dumerili OX=41447 PE=4 SV=1	S	Function unknown	apoptosis regulatory protein Siva [Seriola dumerili]
c101784.graph_c0	7	52	68	191	793	137	0.14	1.11	1.27	3.29	13.36	2.8	0.000191319	3.19447	up	[G]	Carbohydrate transport and metabolism	Cellular Component: integral component of membrane (GO:0016021);; Molecular Function: transmembrane transporter activity (GO:0022857);;	K08171|2.5e-246|sdu:111222224|K08171 MFS transporter, OPA family, solute carrier family 37 (glycerol-6-phosphate transporter), member 4 | (RefSeq) glucose-6-phosphate exchanger SLC37A4-like	[G]	Carbohydrate transport and metabolism	Major Facilitator Superfamily;; POT family	--	MFS domain-containing protein OS=Seriola lalandi dorsalis OX=1841481 PE=3 SV=1	G	Carbohydrate transport and metabolism	glucose-6-phosphate exchanger SLC37A4-like [Seriola dumerili]
c97777.graph_c0	422	343	231	1426	3395	687	8.62	7.32	4.43	29.23	70.45	16.94	0.00345322	2.31541	up	--	--	Cellular Component: Golgi membrane (GO:0000139);; Molecular Function: G protein-coupled receptor binding (GO:0001664);; Biological Process: formation of primary germ layer (GO:0001704);; Biological Process: mesoderm formation (GO:0001707);; Biological Process: intramembranous ossification (GO:0001957);; Biological Process: endochondral ossification (GO:0001958);; Biological Process: peptide secre…	--	--	--	Wnt-binding factor required for Wnt secretion;; Wnt-binding factor required for Wnt secretion	Protein wntless homolog OS=Gallus gallus OX=9031 GN=WLS PE=2 SV=1	Uncharacterized protein OS=Seriola lalandi dorsalis OX=1841481 PE=3 SV=1	U	Intracellular trafficking, secretion, and vesicular transport	protein wntless homolog isoform X1 [Seriola lalandi dorsalis]
c106120.graph_c0	1	1	7	104	379	43	0.02	0.01	0.09	1.26	4.91	0.77	1.56e-08	5.29001	up	--	--	Cellular Component: integral component of membrane (GO:0016021);;	K17599|0.0e+00|sdu:111238958|K17599 transmembrane protein 132 | (RefSeq) transmembrane protein 132D-like	[S]	Function unknown	Transmembrane protein family 132;; Mature oligodendrocyte transmembrane protein, TMEM132D, C-term	Transmembrane protein 132E OS=Danio rerio OX=7955 GN=tmem132e PE=2 SV=1	Uncharacterized protein OS=Seriola dumerili OX=41447 PE=3 SV=1	S	Function unknown	transmembrane protein 132D-like [Seriola dumerili]
c99791.graph_c2	25	629	67	8	29	6	4.2	116.25	10.86	1.22	4.33	1.06	0.0067414	-3.05728	down	[O]	Posttranslational modification, protein turnover, chaperones	Molecular Function: serine-type endopeptidase activity (GO:0004252);;	K01312|1.1e-34|sdu:111234066|K01312 trypsin [EC:3.4.21.4] | (RefSeq) trypsin-3-like	[E]	Amino acid transport and metabolism	Trypsin	Trypsin OS=Xenopus laevis OX=8355 PE=2 SV=1	Peptidase S1 domain-containing protein OS=Seriola dumerili OX=41447 PE=4 SV=1	E	Amino acid transport and metabolism	trypsin-3-like [Seriola lalandi dorsalis]
c90698.graph_c0	14	33	29	51	189	37	0.36	0.93	0.71	1.16	4.18	1	0.00652104	1.98922	up	[J]	Translation, ribosomal structure and biogenesis	Biological Process: somitogenesis (GO:0001756);; Biological Process: heart looping (GO:0001947);; Biological Process: atrial cardiac muscle tissue development (GO:0003228);; Biological Process: ventricular cardiac muscle tissue development (GO:0003229);; Molecular Function: RNA binding (GO:0003723);; Biological Process: mRNA processing (GO:0006397);; Biological Process: skeletal muscle tissue dev…	K12741|4.2e-12|cin:100184318|K12741 heterogeneous nuclear ribonucleoprotein A1/A3 | (RefSeq) heterogeneous nuclear ribonucleoprotein A1 isoform X1	[R]	General function prediction only	RNA recognition motif. (a.k.a. RRM, RBD, or RNP domain)	RNA-binding protein 24 OS=Danio rerio OX=7955 GN=rbm24 PE=2 SV=1	RRM domain-containing protein OS=Seriola dumerili OX=41447 PE=4 SV=1	A	RNA processing and modification	RNA-binding protein 24-like [Seriola dumerili]
c106285.graph_c0	28	4150	4588	30	28	3	0.58	94.22	91.15	0.55	0.5	0.07	9.6e-06	-5.21824	down	--	--	Molecular Function: microtubule motor activity (GO:0003777);; Molecular Function: calcium ion binding (GO:0005509);; Molecular Function: ATP binding (GO:0005524);; Biological Process: microtubule-based movement (GO:0007018);; Cellular Component: dynein complex (GO:0030286);; Biological Process: determination of liver left/right asymmetry (GO:0071910);;	K10408|0.0e+00|sdu:111218817|K10408 dynein heavy chain, axonemal | (RefSeq) dnah7; dynein heavy chain 7, axonemal	[Z]	Cytoskeleton	Dynein heavy chain C-terminal domain;; Dynein heavy chain AAA lid domain;; Dynein heavy chain region D6 P-loop domain;; ATP-binding dynein motor region	--	EF-hand domain-containing protein OS=Seriola dumerili OX=41447 PE=3 SV=1	Z	Cytoskeleton	dynein heavy chain 7, axonemal [Seriola dumerili]
c93383.graph_c4	960	1344	1158	2415	4376	1543	42.34	62.5	46.4	98.91	174.21	71.16	0.00422571	1.47587	up	[O]	Posttranslational modification, protein turnover, chaperones	Biological Process: reproduction (GO:0000003);; Biological Process: regulation of oxidative phosphorylation (GO:0002082);; Biological Process: developmental process involved in reproduction (GO:0003006);; Biological Process: system process (GO:0003008);; Cellular Component: cellular_component (GO:0005575);; Cellular Component: intracellular (GO:0005622);; Cellular Component: obsolete cell (GO:000…	K17081|1.3e-156|sdu:111238450|K17081 prohibitin 2 | (RefSeq) prohibitin-2-like	[O]	Posttranslational modification, protein turnover, chaperones	SPFH domain / Band 7 family	Prohibitin-2 OS=Xenopus tropicalis OX=8364 GN=phb2 PE=2 SV=1	Prohibitin OS=Echeneis naucrates OX=173247 GN=LOC115042030 PE=3 SV=1	O	Posttranslational modification, protein turnover, chaperones	prohibitin-2-like [Echeneis naucrates]
c106620.graph_c2	13	2355	3173	3	27	3	0.63	105.45	123.98	0.17	1.13	0.2	8.01e-06	-5.39754	down	--	--	Molecular Function: ARF guanyl-nucleotide exchange factor activity (GO:0005086);; Molecular Function: phospholipid binding (GO:0005543);; Biological Process: regulation of ARF protein signal transduction (GO:0032012);;	K12494|6.6e-78|sdu:111240034|K12494 PH and SEC7 domain-containing protein | (RefSeq) PH and SEC7 domain-containing protein 4-like	--	--	--	--	Uncharacterized protein OS=Seriola dumerili OX=41447 PE=4 SV=1	T	Signal transduction mechanisms	PH and SEC7 domain-containing protein 3-like [Seriola lalandi dorsalis]
c89466.graph_c0	470	8349	10596	247	386	173	13.47	260.24	289.07	6.27	9.49	5.2	7.77e-05	-3.59042	down	--	--	Cellular Component: ubiquitin ligase complex (GO:0000151);; Biological Process: instar larval or pupal development (GO:0002165);; Cellular Component: cellular_component (GO:0005575);; Cellular Component: intracellular (GO:0005622);; Cellular Component: obsolete cell (GO:0005623);; Cellular Component: cytoplasm (GO:0005737);; Cellular Component: centrosome (GO:0005813);; Cellular Component: microt…	K11803|5.3e-288|sdu:111221946|K11803 DDB1- and CUL4-associated factor 12 | (RefSeq) dcaf12; DDB1- and CUL4-associated factor 12	--	--	--	DDB1- and CUL4-associated factor 12 OS=Danio rerio OX=7955 GN=dcaf12 PE=2 SV=1	WD_REPEATS_REGION domain-containing protein OS=Echeneis naucrates OX=173247 GN=dcaf12 PE=4 SV=1	S	Function unknown	DDB1- and CUL4-associated factor 12 [Echeneis naucrates]
c89869.graph_c0	3	10	17	1084	3563	436	0.13	0.47	0.71	41.98	133.62	19.96	3.43e-21	7.00916	up	--	--	Molecular Function: molecular_function (GO:0003674);; Molecular Function: binding (GO:0005488);; Molecular Function: protein binding (GO:0005515);; Cellular Component: cellular_component (GO:0005575);; Cellular Component: extracellular region (GO:0005576);; Cellular Component: intracellular (GO:0005622);; Cellular Component: obsolete cell (GO:0005623);; Cellular Component: nucleus (GO:0005634);; …	K17284|1.1e-114|lcf:108896494|K17284 perilipin-2 | (RefSeq) perilipin-2-like	--	--	Perilipin family	--	Uncharacterized protein OS=Lates calcarifer OX=8187 GN=LOC108896494 PE=3 SV=1	S	Function unknown	perilipin-2-like isoform X1 [Seriola lalandi dorsalis]
c98139.graph_c1	310	714	648	1001	1850	748	6.38	15.57	11.46	20.44	44.58	18.29	0.00059833	1.44812	up	--	--	Cellular Component: integral component of membrane (GO:0016021);; Biological Process: positive regulation of protein dephosphorylation (GO:0035307);; Cellular Component: Nem1-Spo7 phosphatase complex (GO:0071595);;	--	--	--	Transmembrane protein 188	Nuclear envelope phosphatase-regulatory subunit 1 OS=Danio rerio OX=7955 GN=cnep1r1 PE=2 SV=1	Nuclear envelope phosphatase-regulatory subunit 1 OS=Etheostoma spectabile OX=54343 GN=FQN60_011407 PE=3 SV=1	S	Function unknown	hypothetical protein FQN60_011407 [Etheostoma spectabile]
c90843.graph_c1	7	9	16	65	323	39	0.25	0.36	0.55	2.09	10.07	1.49	2.55e-05	3.53077	up	--	--	--	--	--	--	--	--	RRM domain-containing protein OS=Scophthalmus maximus OX=52904 GN=F2P81_023502 PE=3 SV=1	--	--	hypothetical protein F2P81_023502 [Scophthalmus maximus]
c89365.graph_c0	1721	837	247	28	130	74	93.11	49.2	12.54	1.13	5.94	4.08	0.002648	-3.14956	down	--	--	Cellular Component: troponin complex (GO:0005861);;	K10371|3.4e-92|sdu:111224684|K10371 troponin I, slow skeletal muscle | (RefSeq) troponin I, slow skeletal muscle-like	[Z]	Cytoskeleton	Troponin	Troponin I, cardiac muscle OS=Coturnix japonica OX=93934 GN=TNNI3 PE=2 SV=2	Uncharacterized protein OS=Seriola dumerili OX=41447 PE=4 SV=1	Z	Cytoskeleton	troponin I, slow skeletal muscle-like isoform X1 [Labrus bergylta]
c100343.graph_c0	103	49	96	8	20	13	10.29	5.74	9.77	0.77	1.87	1.59	0.00980499	-2.21909	down	--	--	Molecular Function: ATP binding (GO:0005524);;	K22614|1.2e-16|sdu:111231876|K22614 NLR family CARD domain-containing protein 3 | (RefSeq) protein NLRC3-like	--	--	Leucine Rich Repeat;; Leucine Rich repeat	--	Uncharacterized protein OS=Seriola dumerili OX=41447 PE=4 SV=1	S	Function unknown	protein NLRC3-like [Seriola dumerili]
c96405.graph_c2	42	209	302	17	9	25	5.26	28.74	36.45	1.92	0.99	3.3	0.00924902	-2.42002	down	--	--	Molecular Function: molecular_function (GO:0003674);; Molecular Function: GTPase activator activity (GO:0005096);; Cellular Component: cellular_component (GO:0005575);; Cellular Component: intracellular (GO:0005622);; Cellular Component: obsolete cell (GO:0005623);; Cellular Component: cytoplasm (GO:0005737);; Cellular Component: cytosol (GO:0005829);; Molecular Function: enzyme activator activit…	--	--	--	--	--	Rho-GAP domain-containing protein OS=Echeneis naucrates OX=173247 GN=fam13b PE=3 SV=1	T	Signal transduction mechanisms	protein FAM13B isoform X1 [Echeneis naucrates]
c88394.graph_c0	20	238	254	16	13	9	1.29	16.81	15.71	0.92	0.73	0.61	0.00206238	-2.8098	down	[J]	Translation, ribosomal structure and biogenesis	Molecular Function: translation elongation factor activity (GO:0003746);; Molecular Function: GTPase activity (GO:0003924);; Molecular Function: GTP binding (GO:0005525);;	K03231|6.7e-79|lcf:108884517|K03231 elongation factor 1-alpha | (RefSeq) elongation factor 1-alpha 1	[J]	Translation, ribosomal structure and biogenesis	Elongation factor Tu C-terminal domain	Elongation factor 1-alpha 1 OS=Gallus gallus OX=9031 GN=EEF1A PE=2 SV=1	Elongation factor 1-alpha OS=Lates calcarifer OX=8187 PE=3 SV=1	J	Translation, ribosomal structure and biogenesis	elongation factor 1-alpha 1 [Larimichthys crocea]
c93001.graph_c0	1	1	3	2443	7849	947	0.02	0.03	0.07	53.25	165.62	24.47	2.08e-33	9.86214	up	[E]	Amino acid transport and metabolism	Cellular Component: integral component of membrane (GO:0016021);; Molecular Function: transmembrane transporter activity (GO:0022857);;	K13864|1.3e-301|sdu:111220764|K13864 solute carrier family 7 (cationic amino acid transporter), member 2 | (RefSeq) cationic amino acid transporter 2-like	[E]	Amino acid transport and metabolism	Amino acid permease;; Amino acid permease;; C-terminus of AA_permease	Cationic amino acid transporter 2 OS=Danio rerio OX=7955 GN=slc7a2 PE=2 SV=1	AA_permease_C domain-containing protein OS=Seriola dumerili OX=41447 PE=4 SV=1	E	Amino acid transport and metabolism	cationic amino acid transporter 2-like [Seriola dumerili]
c100866.graph_c0	69	5511	5992	169	331	112	2.87	231.5	220.13	5.8	11.02	4.49	0.00655048	-3.10362	down	[U]	Intracellular trafficking, secretion, and vesicular transport	Molecular Function: cysteine-type peptidase activity (GO:0008234);;	K08597|3.4e-125|lcf:108887850|K08597 sentrin-specific protease 8 [EC:3.4.22.68] | (RefSeq) senp8; sentrin-specific protease 8	[R]	General function prediction only	Ulp1 protease family, C-terminal catalytic domain	--	ULP_PROTEASE domain-containing protein OS=Lates calcarifer OX=8187 GN=senp8 PE=3 SV=1	S	Function unknown	PREDICTED: sentrin-specific protease 8 [Lates calcarifer]
c107411.graph_c1	402	1077	967	179	340	157	11.83	26.09	19.76	4.52	7.75	5.22	0.00206238	-1.40955	down	--	--	Cellular Component: cytoplasm (GO:0005737);; Molecular Function: zinc ion binding (GO:0008270);;	K10366|1.0e-39|nve:5512847|K10366 dystrophin | (RefSeq) dystrophin isoform X1	[Z]	Cytoskeleton	EF hand;; EF-hand;; Zinc finger, ZZ type	Dystrophin OS=Gallus gallus OX=9031 GN=DMD PE=2 SV=1	Dystrobrevin OS=Seriola dumerili OX=41447 PE=3 SV=1	Z	Cytoskeleton	dystrobrevin beta-like isoform X3 [Seriola lalandi dorsalis]
c105779.graph_c0	732	1773	3054	276	466	264	5.31	13.99	21.16	1.78	2.92	2.01	0.000995783	-1.91222	down	[DZ]	--	Biological Process: cell morphogenesis (GO:0000902);; Biological Process: cell morphogenesis involved in differentiation (GO:0000904);; Biological Process: behavioral fear response (GO:0001662);; Biological Process: in utero embryonic development (GO:0001701);; Cellular Component: ruffle (GO:0001726);; Biological Process: receptor recycling (GO:0001881);; Biological Process: regulation of protein…	K04575|0.0e+00|sdu:111232646|K04575 amyotrophic lateral sclerosis 2 protein | (RefSeq) als2; alsin	[R]	General function prediction only	Regulator of chromosome condensation (RCC1) repeat;; MORN repeat;; Regulator of chromosome condensation (RCC1) repeat;; Vacuolar sorting protein 9 (VPS9) domain	Protein RCC2 homolog OS=Xenopus laevis OX=8355 GN=rcc2 PE=2 SV=1	VPS9 domain-containing protein OS=Seriola dumerili OX=41447 PE=4 SV=1	T	Signal transduction mechanisms	alsin isoform X2 [Seriola lalandi dorsalis]
c101149.graph_c1	13	526	621	16	29	14	0.81	33.29	34.99	0.82	1.49	0.8	0.002973	-3.17895	down	--	--	Molecular Function: protein kinase activity (GO:0004672);; Molecular Function: ATP binding (GO:0005524);;	K08831|1.9e-85|sdu:111229577|K08831 serine/threonine-protein kinase SRPK2 [EC:2.7.11.1] | (RefSeq) srpk2; SRSF protein kinase 2	[T]	Signal transduction mechanisms	Protein kinase domain	Dual specificity tyrosine-phosphorylation-regulated kinase 2 OS=Gallus gallus OX=9031 GN=DYRK2 PE=2 SV=1	Protein kinase domain-containing protein OS=Stegastes partitus OX=144197 PE=4 SV=1	T	Signal transduction mechanisms	SRSF protein kinase 2 [Seriola dumerili]
c94723.graph_c0	303	1286	1353	149	231	118	7.21	33.39	30.86	3.18	4.73	2.97	0.00083601	-1.97443	down	--	--	Biological Process: determination of dorsal identity (GO:0048263);; Biological Process: positive regulation of canonical Wnt signaling pathway (GO:0090263);;	K23338|5.0e-124|sdu:111217355|K23338 glucose-induced degradation protein 8 | (RefSeq) glucose-induced degradation protein 8 homolog	[Z]	Cytoskeleton	CTLH/CRA C-terminal to LisH motif domain;; LisH	Glucose-induced degradation protein 8-B homolog OS=Danio rerio OX=7955 GN=gid8b PE=2 SV=2	Uncharacterized protein OS=Lates calcarifer OX=8187 PE=4 SV=1	Z	Cytoskeleton	hypothetical protein EPR50_G00075170 [Perca flavescens]
c90801.graph_c0	119	222	178	417	732	367	4.85	9.86	6.94	15.13	25.71	15.73	1.01e-05	1.86405	up	--	--	Molecular Function: protein disulfide oxidoreductase activity (GO:0015035);; Biological Process: protein import into mitochondrial intermembrane space (GO:0045041);;	K17782|5.0e-78|sdu:111221843|K17782 mitochondrial intermembrane space import and assembly protein 40 | (RefSeq) mitochondrial intermembrane space import and assembly protein 40-like	[S]	Function unknown	CHCH domain	Mitochondrial intermembrane space import and assembly protein 40-A OS=Xenopus laevis OX=8355 GN=chchd4-a PE=2 SV=1	CHCH domain-containing protein OS=Seriola lalandi dorsalis OX=1841481 PE=4 SV=1	S	Function unknown	mitochondrial intermembrane space import and assembly protein 40-like [Seriola lalandi dorsalis]
c101335.graph_c0	25	2778	3596	26	26	6	0.56	77.88	91.79	0.58	0.61	0.15	8.76e-06	-5.0382	down	[G]	Carbohydrate transport and metabolism	Cellular Component: phosphopyruvate hydratase complex (GO:0000015);; Molecular Function: magnesium ion binding (GO:0000287);; Molecular Function: phosphopyruvate hydratase activity (GO:0004634);; Biological Process: glycolytic process (GO:0006096);;	K01689|8.8e-129|sdu:111236422|K01689 enolase [EC:4.2.1.11] | (RefSeq) eno4; enolase 4	[G]	Carbohydrate transport and metabolism	Enolase, N-terminal domain;; Enolase, C-terminal TIM barrel domain	Enolase 4 OS=Danio rerio OX=7955 GN=eno4 PE=2 SV=1	2-phospho-D-glycerate hydro-lyase OS=Seriola dumerili OX=41447 PE=3 SV=1	G	Carbohydrate transport and metabolism	enolase 4 [Seriola dumerili]
c107408.graph_c0	0	6	6	245	927	108	0	0.07	0.06	2.37	8.69	1.24	1.18e-12	6.21299	up	--	--	Cellular Component: extracellular region (GO:0005576);; Biological Process: lipid transport (GO:0006869);; Molecular Function: lipid binding (GO:0008289);; Biological Process: lipoprotein metabolic process (GO:0042157);;	K14480|5.0e-69|sasa:106600370|K14480 apolipoprotein L | (RefSeq) uncharacterized LOC106600370	--	--	Apolipoprotein L	--	Uncharacterized protein OS=Seriola lalandi dorsalis OX=1841481 PE=3 SV=1	S	Function unknown	uncharacterized protein LOC111661687 isoform X1 [Seriola lalandi dorsalis]
c99364.graph_c0	26	527	894	21	17	16	2.27	9.16	13.9	1.33	0.7	1.12	0.000522996	-3.52003	down	--	--	Cellular Component: extracellular region (GO:0005576);; Biological Process: sensory perception of sound (GO:0007605);; Biological Process: L-arabinose metabolic process (GO:0046373);; Molecular Function: alpha-L-arabinofuranosidase activity (GO:0046556);;	K03900|4.3e-47|cjo:107318080|K03900 von Willebrand factor | (RefSeq) VWF; von Willebrand factor	[WV]	--	von Willebrand factor type D domain	--	Uncharacterized protein OS=Perca flavescens OX=8167 GN=EPR50_G00089420 PE=4 SV=1	--	--	otogelin-like protein [Seriola lalandi dorsalis]
c106629.graph_c0	3	2880	4245	20	23	7	0.04	53.43	69.61	0.27	0.32	0.11	0.000113816	-4.91471	down	--	--	--	K19721|2.0e-181|sdu:111216533|K19721 collagen type V/XI/XXIV/XXVII, alpha | (RefSeq) col5a3; collagen alpha-3(V) chain	[W]	Extracellular structures	Collagen triple helix repeat (20 copies)	Collagen alpha-1(XXVII) chain A OS=Danio rerio OX=7955 GN=col27a1a PE=2 SV=1	Fibrillar collagen NC1 domain-containing protein OS=Perca fluviatilis OX=8168 GN=PFLUV_G00004460 PE=4 SV=1	W	Extracellular structures	collagen alpha-3(V) chain [Seriola dumerili]
c95372.graph_c0	5	2	7	860	8482	540	0.2	0.09	0.27	31.31	298.91	23.23	1.52e-17	7.96104	up	--	--	Molecular Function: molecular_function (GO:0003674);; Molecular Function: GTPase activator activity (GO:0005096);; Biological Process: cell communication (GO:0007154);; Biological Process: establishment or maintenance of cell polarity (GO:0007163);; Biological Process: signal transduction (GO:0007165);; Biological Process: small GTPase mediated signal transduction (GO:0007264);; Molecular Functio…	--	[T]	Signal transduction mechanisms	Armadillo/beta-catenin-like repeat	Rap1 GTPase-GDP dissociation stimulator 1-A OS=Xenopus laevis OX=8355 GN=rap1gds1-a PE=1 SV=1	Rap1 GTPase-GDP dissociation stimulator 1 OS=Channa argus OX=215402 GN=EXN66_Car019904 PE=4 SV=1	S	Function unknown	rap1 GTPase-GDP dissociation stimulator 1-like isoform X1 [Seriola dumerili]
c96686.graph_c0	393	189	49	9	0	13	12.23	6.42	1.43	0.24	0	0.41	0.00746135	-3.49951	down	--	--	Molecular Function: molecular_function (GO:0003674);; Molecular Function: actin binding (GO:0003779);; Molecular Function: binding (GO:0005488);; Molecular Function: protein binding (GO:0005515);; Cellular Component: cellular_component (GO:0005575);; Cellular Component: intracellular (GO:0005622);; Cellular Component: obsolete cell (GO:0005623);; Cellular Component: cytoplasm (GO:0005737);; Cellu…	--	--	--	Calcineurin-binding protein (Calsarcin)	--	Uncharacterized protein OS=Seriola dumerili OX=41447 PE=3 SV=1	S	Function unknown	myozenin-2-like isoform X1 [Seriola dumerili]
c92667.graph_c0	47	86	51	1074	2788	319	1.7	3.35	1.66	31.56	78.94	11.15	9.75e-10	4.33094	up	--	--	Molecular Function: nucleic acid binding (GO:0003676);;	K05707|1.3e-76|lco:104939346|K05707 snail 1 | (RefSeq) protein snail homolog Sna	[K]	Transcription	Zinc finger, C2H2 type;; Zinc-finger double domain;; C2H2-type zinc finger;; Zinc-finger double-stranded RNA-binding;; Zinc-finger of C2H2 type;; C2H2-type zinc finger	--	Uncharacterized protein OS=Echeneis naucrates OX=173247 GN=LOC115043609 PE=4 SV=1	K	Transcription	protein snail homolog Sna-like [Echeneis naucrates]
c92027.graph_c0	19	38	29	139	304	49	1.53	3.34	2.23	10.09	21.24	4.15	0.000170883	2.59028	up	[VI]	--	Molecular Function: glutathione peroxidase activity (GO:0004602);; Biological Process: response to oxidative stress (GO:0006979);; Cellular Component: integral component of membrane (GO:0016021);;	K00432|3.0e-109|sdu:111236508|K00432 glutathione peroxidase [EC:1.11.1.9] | (RefSeq) gpx8; probable glutathione peroxidase 8	[O]	Posttranslational modification, protein turnover, chaperones	Glutathione peroxidase	Probable glutathione peroxidase 8 OS=Tetraodon nigroviridis OX=99883 GN=gpx8 PE=3 SV=1	Glutathione peroxidase OS=Seriola dumerili OX=41447 PE=3 SV=1	O	Posttranslational modification, protein turnover, chaperones	hypothetical protein PFLUV_G00073350 [Perca fluviatilis]
c99485.graph_c0	18	5670	8329	24	25	15	0.53	181.77	233.73	0.63	0.63	0.46	2.14e-06	-5.55986	down	--	--	Biological Process: reproduction (GO:0000003);; Biological Process: microtubule cytoskeleton organization (GO:0000226);; Biological Process: microtubule bundle formation (GO:0001578);; Biological Process: system process (GO:0003008);; Biological Process: cilium movement (GO:0003341);; Molecular Function: molecular_function (GO:0003674);; Molecular Function: motor activity (GO:0003774);; Molecular…	K11143|1.0e-299|lcf:108889913|K11143 dynein intermediate chain 2, axonemal | (RefSeq) dnai2; dynein intermediate chain 2, axonemal	[Z]	Cytoskeleton	--	--	WD_REPEATS_REGION domain-containing protein OS=Lates calcarifer OX=8187 GN=dnai2 PE=4 SV=1	Z	Cytoskeleton	dynein intermediate chain 2, axonemal [Seriola lalandi dorsalis]
c92089.graph_c0	570	1171	1070	4401	6919	2425	24.92	56.21	44.47	182.21	275.36	112.66	2.48e-10	2.57391	up	[E]	Amino acid transport and metabolism	Biological Process: pseudouridine synthesis (GO:0001522);; Molecular Function: RNA binding (GO:0003723);; Biological Process: rRNA processing (GO:0006364);; Molecular Function: pseudouridine synthase activity (GO:0009982);; Biological Process: definitive hemopoiesis (GO:0060216);;	K11131|2.3e-237|sdu:111236099|K11131 H/ACA ribonucleoprotein complex subunit 4 [EC:5.4.99.-] | (RefSeq) dkc1; H/ACA ribonucleoprotein complex subunit 4	[J]	Translation, ribosomal structure and biogenesis	DKCLD (NUC011) domain;; TruB family pseudouridylate synthase (N terminal domain);; tRNA pseudouridylate synthase B C-terminal domain;; PUA domain	H/ACA ribonucleoprotein complex subunit DKC1 OS=Gallus gallus OX=9031 GN=DKC1 PE=2 SV=1	PUA domain-containing protein OS=Seriola dumerili OX=41447 PE=3 SV=1	J	Translation, ribosomal structure and biogenesis	H/ACA ribonucleoprotein complex subunit 4 [Seriola dumerili]
c101078.graph_c0	21	1391	1443	31	51	17	0.69	47.21	44.09	0.87	1.37	0.56	0.000937432	-3.62653	down	[T]	Signal transduction mechanisms	Molecular Function: protein serine/threonine kinase activity (GO:0004674);; Molecular Function: ATP binding (GO:0005524);; Biological Process: cilium assembly (GO:0060271);;	K08817|8.0e-198|sdu:111235442|K08817 cell cycle related kinase [EC:2.7.11.22] | (RefSeq) cdk20; cyclin-dependent kinase 20	[DKL]	--	Protein kinase domain;; Protein tyrosine and serine/threonine kinase	Cyclin-dependent kinase 20 OS=Danio rerio OX=7955 GN=cdk20 PE=2 SV=1	Protein kinase domain-containing protein OS=Seriola dumerili OX=41447 PE=3 SV=1	T	Signal transduction mechanisms	cyclin-dependent kinase 20 [Seriola dumerili]
c96846.graph_c1	178	1550	1076	60	24	43	6.86	89.16	54.28	2	0.92	1.94	6.28e-05	-3.39533	down	--	--	Biological Process: negative regulation of transcription by RNA polymerase II (GO:0000122);; Molecular Function: translation repressor activity, mRNA regulatory element binding (GO:0000900);; Biological Process: response to acid chemical (GO:0001101);; Biological Process: urogenital system development (GO:0001655);; Biological Process: kidney development (GO:0001822);; Biological Process: system …	K02602|6.2e-120|csem:103387485|K02602 cytoplasmic polyadenylation element-binding protein | (RefSeq) cpeb3; cytoplasmic polyadenylation element-binding protein 3 isoform X1	[J]	Translation, ribosomal structure and biogenesis	RNA recognition motif;; RNA recognition motif. (a.k.a. RRM, RBD, or RNP domain)	Cytoplasmic polyadenylation element-binding protein 3 OS=Xenopus tropicalis OX=8364 GN=cpeb3 PE=2 SV=1	Cytoplasmic polyadenylation element binding protein 3 OS=Sparus aurata OX=8175 PE=4 SV=1	A	RNA processing and modification	cytoplasmic polyadenylation element-binding protein 3-like [Salarias fasciatus]
c102370.graph_c0	38	46	69	107	346	111	1.23	1.9	2.31	3.32	10.6	3.87	0.0012954	2.03097	up	--	--	Molecular Function: molecular_function (GO:0003674);; Molecular Function: catalytic activity (GO:0003824);; Cellular Component: cellular_component (GO:0005575);; Cellular Component: intracellular (GO:0005622);; Cellular Component: obsolete cell (GO:0005623);; Cellular Component: cytoplasm (GO:0005737);; Cellular Component: mitochondrion (GO:0005739);; Cellular Component: mitochondrial matrix (GO:…	K18201|6.9e-182|sdu:111221554|K18201 hydroxylysine kinase [EC:2.7.1.81] | (RefSeq) hydroxylysine kinase-like	--	--	Phosphotransferase enzyme family	Hydroxylysine kinase OS=Danio rerio OX=7955 GN=hykk PE=2 SV=1	APH domain-containing protein OS=Seriola dumerili OX=41447 GN=HYKK PE=4 SV=1	S	Function unknown	hydroxylysine kinase-like [Seriola dumerili]
c97779.graph_c1	48	108	73	13	17	4	2.1	15.35	8.4	0.69	1.27	0.22	0.000603274	-2.29265	down	--	--	--	K13708|4.7e-19|ccar:109101282|K13708 dedicator of cytokinesis protein 1 | (RefSeq) dedicator of cytokinesis protein 1-like	--	--	--	--	uncharacterized protein LOC106528851 OS=Austrofundulus limnaeus OX=52670 GN=LOC106528851 PE=4 SV=1	--	--	hypothetical protein cypCar_00027690, partial [Cyprinus carpio]
c94743.graph_c0	4	3	7	7351	20432	2771	0.54	0.44	0.91	899.56	2425.63	395.18	7.88e-46	10.2225	up	--	--	--	--	--	--	Protein of unknown function (DUF1373)	--	Uncharacterized protein OS=Echeneis naucrates OX=173247 PE=4 SV=1	--	--	keratin, type I cytoskeletal 9-like [Seriola lalandi dorsalis]
c86867.graph_c1	160	147	117	480	948	234	7.58	7.58	5.29	20.23	38.69	11.65	0.00603701	1.96193	up	--	--	Biological Process: regulation of cell growth (GO:0001558);; Molecular Function: actin binding (GO:0003779);; Molecular Function: structural molecule activity (GO:0005198);; Cellular Component: cytoskeleton (GO:0005856);; Cellular Component: plasma membrane (GO:0005886);; Cellular Component: cell-cell junction (GO:0005911);; Biological Process: cortical actin cytoskeleton organization (GO:0030866…	K10507|6.0e-19|dre:562507|K10507 zinc finger and BTB domain-containing protein 33 | (RefSeq) zbtb33; transcriptional regulator Kaiso	[R]	General function prediction only	BTB/POZ domain;; Zinc-finger double domain;; Zinc finger, C2H2 type;; Zinc-finger double-stranded RNA-binding;; C2H2-type zinc finger;; Zinc-finger of C2H2 type	Zinc finger and BTB domain-containing protein 14 OS=Gallus gallus OX=9031 GN=ZBTB14 PE=2 SV=1	Band 4.1-like protein 3 OS=Larimichthys crocea OX=215358 GN=EH28_07631 PE=4 SV=1	S	Function unknown	hypothetical protein PFLUV_G00133480 [Perca fluviatilis]
c103415.graph_c0	5	41	65	217	509	51	0.14	1.21	1.68	5.23	11.85	1.45	0.00322138	2.83965	up	--	--	Molecular Function: guanyl-nucleotide exchange factor activity (GO:0005085);; Biological Process: small GTPase mediated signal transduction (GO:0007264);;	K08732|1.1e-25|fca:101090558|K08732 ral guanine nucleotide dissociation stimulator | (RefSeq) RALGDS; ral guanine nucleotide dissociation stimulator isoform X2	[T]	Signal transduction mechanisms	Ras association (RalGDS/AF-6) domain	Ral guanine nucleotide dissociation stimulator-like 1 OS=Danio rerio OX=7955 GN=rgl1 PE=2 SV=1	Uncharacterized protein OS=Seriola dumerili OX=41447 PE=4 SV=1	T	Signal transduction mechanisms	ral guanine nucleotide dissociation stimulator-like 1 isoform X2 [Seriola lalandi dorsalis]
c93124.graph_c0	80	97	99	245	575	218	4.24	5.6	5.01	11.57	26.29	12.15	0.000118687	2.0798	up	[H]	Coenzyme transport and metabolism	Molecular Function: pyridoxamine-phosphate oxidase activity (GO:0004733);; Biological Process: pyridoxine biosynthetic process (GO:0008615);; Molecular Function: FMN binding (GO:0010181);;	K00275|1.4e-152|sdu:111220047|K00275 pyridoxamine 5'-phosphate oxidase [EC:1.4.3.5] | (RefSeq) pnpo; pyridoxine-5'-phosphate oxidase	[H]	Coenzyme transport and metabolism	Pyridoxamine 5'-phosphate oxidase;; Pyridoxine 5'-phosphate oxidase C-terminal dimerisation region;; Pyridoxamine 5'-phosphate oxidase	--	Pyridoxal 5'-phosphate synthase OS=Seriola dumerili OX=41447 PE=3 SV=1	H	Coenzyme transport and metabolism	pyridoxine-5'-phosphate oxidase [Seriola dumerili]
c90315.graph_c0	79	685	856	36	71	11	2.1	19.82	21.68	0.85	1.62	0.31	0.000603232	-3.0356	down	--	--	Cellular Component: ubiquitin ligase complex (GO:0000151);; Molecular Function: molecular_function (GO:0003674);; Molecular Function: catalytic activity (GO:0003824);; Molecular Function: ubiquitin-protein transferase activity (GO:0004842);; Cellular Component: cellular_component (GO:0005575);; Cellular Component: intracellular (GO:0005622);; Cellular Component: obsolete cell (GO:0005623);; Cellu…	K10305|1.7e-204|sdu:111239178|K10305 F-box protein 25/32 | (RefSeq) fbxo25; F-box only protein 25 isoform X1	[E]	Amino acid transport and metabolism	--	--	Uncharacterized protein OS=Seriola lalandi dorsalis OX=1841481 PE=4 SV=1	E	Amino acid transport and metabolism	F-box only protein 25 isoform X2 [Seriola dumerili]
c97969.graph_c0	13	12	6	59	93	42	0.41	0.41	0.18	1.62	2.48	1.39	0.000279785	2.67773	up	[G]	Carbohydrate transport and metabolism	Molecular Function: catalytic activity (GO:0003824);;	K14634|2.4e-80|sdu:111225217|K14634 fructose-2,6-bisphosphatase [EC:3.1.3.46] | (RefSeq) probable fructose-2,6-bisphosphatase TIGAR A	[G]	Carbohydrate transport and metabolism	Histidine phosphatase superfamily (branch 1);; Histidine phosphatase superfamily (branch 1)	Probable fructose-2,6-bisphosphatase TIGAR A OS=Danio rerio OX=7955 GN=tigara PE=2 SV=1	Uncharacterized protein OS=Seriola dumerili OX=41447 PE=4 SV=1	G	Carbohydrate transport and metabolism	probable fructose-2,6-bisphosphatase TIGAR A [Seriola dumerili]
c95883.graph_c0	335	371	365	962	2353	513	7.11	9.04	7.37	18.61	42.64	11.39	0.00426247	1.88232	up	--	--	Cellular Component: nucleus (GO:0005634);; Biological Process: regulation of response to reactive oxygen species (GO:1901031);;	K20394|3.9e-299|sdu:111223488|K20394 sestrin 2 | (RefSeq) sestrin-2-like isoform X1	[S]	Function unknown	PA26 p53-induced protein (sestrin)	Sestrin-1 OS=Xenopus laevis OX=8355 GN=sesn1 PE=2 SV=1	Uncharacterized protein OS=Seriola dumerili OX=41447 PE=3 SV=1	S	Function unknown	sestrin-2-like isoform X1 [Seriola dumerili]
c106679.graph_c5	75	212	162	275	665	215	9.02	27.86	18.71	29.86	70.05	27.27	0.00201449	1.65882	up	--	--	Molecular Function: molecular_function (GO:0003674);; Molecular Function: binding (GO:0005488);; Molecular Function: protein binding (GO:0005515);; Cellular Component: cellular_component (GO:0005575);; Cellular Component: intracellular (GO:0005622);; Cellular Component: obsolete cell (GO:0005623);; Cellular Component: cytoplasm (GO:0005737);; Cellular Component: endoplasmic reticulum (GO:0005783)…	K17975|4.4e-33|sdu:111225421|K17975 kinectin | (RefSeq) ktn1; kinectin isoform X1	--	--	Ribosome receptor lysine/proline rich region	Kinectin OS=Gallus gallus OX=9031 GN=KTN1 PE=1 SV=1	MutS protein-like protein 4 OS=Larimichthys crocea OX=215358 GN=D5F01_LYC11586 PE=4 SV=1	S	Function unknown	kinectin isoform X1 [Epinephelus lanceolatus]
c107968.graph_c0	629	3376	4232	167	168	259	4.32	25.12	31.57	1.01	0.99	2.15	0.000297127	-2.85175	down	--	--	Molecular Function: serine-type endopeptidase inhibitor activity (GO:0004867);;	K06238|0.0e+00|sdu:111233703|K06238 collagen type VI alpha | (RefSeq) collagen alpha-6(VI) chain-like	[W]	Extracellular structures	von Willebrand factor type A domain;; von Willebrand factor type A domain;; Collagen triple helix repeat (20 copies);; von Willebrand factor type A domain;; VWA domain containing CoxE-like protein;; Integrin beta chain VWA domain	Collagen alpha-3(VI) chain OS=Gallus gallus OX=9031 GN=COL6A3 PE=2 SV=2	Uncharacterized protein OS=Mastacembelus armatus OX=205130 GN=COL6A6 PE=4 SV=1	W	Extracellular structures	collagen alpha-6(VI) chain-like [Seriola dumerili]
c100080.graph_c0	128	338	234	32	45	19	2.97	8.52	5.16	0.66	0.89	0.46	1.44e-06	-2.39205	down	--	--	Molecular Function: metalloendopeptidase activity (GO:0004222);; Molecular Function: zinc ion binding (GO:0008270);; Cellular Component: membrane (GO:0016020);;	K01395|0.0e+00|sdu:111238062|K01395 meprin A [EC:3.4.24.18] | (RefSeq) meprin A subunit alpha-like	[O]	Posttranslational modification, protein turnover, chaperones	Astacin (Peptidase family M12A);; MAM domain, meprin/A5/mu	Low choriolytic enzyme OS=Oryzias latipes OX=8090 GN=lce PE=1 SV=1	Metalloendopeptidase OS=Seriola lalandi dorsalis OX=1841481 PE=4 SV=1	O	Posttranslational modification, protein turnover, chaperones	meprin A subunit alpha-like [Seriola dumerili]
c92830.graph_c0	0	22	11	1364	6134	348	0	2.17	0.95	110.46	481.2	33.04	5.12e-11	6.78196	up	--	--	Cellular Component: lipid droplet (GO:0005811);; Biological Process: apoptotic process (GO:0006915);; Biological Process: lipid storage (GO:0019915);;	K01092|1.7e-34|oor:101277209|K01092 myo-inositol-1(or 4)-monophosphatase [EC:3.1.3.25] | (RefSeq) inositol monophosphatase 2 isoform X1	--	--	CIDE-N domain	--	CIDE-N domain-containing protein OS=Seriola lalandi dorsalis OX=1841481 PE=4 SV=1	S	Function unknown	cell death activator CIDE-A-like [Seriola dumerili]
c104775.graph_c1	186	664	1026	101	116	78	5.18	16.98	22.55	2.15	2.33	2.07	0.00231409	-2.01246	down	--	--	Cellular Component: membrane (GO:0016020);; Biological Process: actin cytoskeleton organization (GO:0030036);; Molecular Function: actin filament binding (GO:0051015);;	K13887|7.7e-256|sdu:111224689|K13887 coronin-2 | (RefSeq) coro2b; coronin-2B isoform X1	[Z]	Cytoskeleton	Domain of unknown function (DUF1899);; Type of WD40 repeat;; WD domain, G-beta repeat;; Anaphase-promoting complex subunit 4 WD40 domain	Coronin-2B OS=Xenopus laevis OX=8355 GN=coro2b PE=2 SV=1	Coronin OS=Amphiprion ocellaris OX=80972 PE=3 SV=1	Z	Cytoskeleton	coronin-2B isoform X1 [Amphiprion ocellaris]
c102392.graph_c4	5	18	13	35	61	23	0.92	3.63	2.31	5.89	9.98	4.48	0.00252455	2.01999	up	--	--	Molecular Function: iron ion binding (GO:0005506);; Molecular Function: 2-oxoglutarate-dependent dioxygenase activity (GO:0016706);; Molecular Function: L-ascorbic acid binding (GO:0031418);;	K24029|1.1e-68|lcf:108877858|K24029 prolyl 3-hydroxylase /prolyl 3,4-dihydroxylase [EC:1.14.11.-] | (RefSeq) ogfod1; prolyl 3-hydroxylase OGFOD1	[B]	Chromatin structure and dynamics	Oxoglutarate and iron-dependent oxygenase degradation C-term	Prolyl 3-hydroxylase OGFOD1 OS=Xenopus laevis OX=8355 GN=ogfod1 PE=2 SV=1	2-oxoglutarate and iron-dependent oxygenase domain-containing protein 1 OS=Lates calcarifer OX=8187 GN=ogfod1 PE=3 SV=1	B	Chromatin structure and dynamics	PREDICTED: prolyl 3-hydroxylase OGFOD1 [Lates calcarifer]
c80233.graph_c0	4	1240	1714	11	26	1	0.16	55.38	67.04	0.4	0.92	0.04	0.000633285	-4.4193	down	--	--	--	--	--	--	--	--	Uncharacterized protein OS=Perca flavescens OX=8167 GN=EPR50_G00110000 PE=4 SV=1	--	--	hypothetical protein HST_G00071950 [Hippoglossus stenolepis]
c99779.graph_c2	0	4	10	200	391	46	0	0.07	0.14	2.83	4.98	0.63	4.28e-08	5.13849	up	--	--	Molecular Function: molecular_function (GO:0003674);; Molecular Function: binding (GO:0005488);; Molecular Function: protein binding (GO:0005515);; Biological Process: biological_process (GO:0008150);; Molecular Function: potassium channel regulator activity (GO:0015459);; Molecular Function: channel regulator activity (GO:0016247);; Biological Process: biological regulation (GO:0065007);; Biolog…	K15682|0.0e+00|lcf:108888545|K15682 ligand of Numb protein X 3/4 [EC:2.3.2.27] | (RefSeq) PDZ domain-containing RING finger protein 4-like isoform X1	[S]	Function unknown	PDZ domain;; PDZ domain	E3 ubiquitin-protein ligase PDZRN3-B OS=Danio rerio OX=7955 GN=pdzrn3b PE=1 SV=1	PDZ domain-containing protein OS=Anabas testudineus OX=64144 GN=PDZRN4 PE=4 SV=1	S	Function unknown	PREDICTED: PDZ domain-containing RING finger protein 4-like isoform X1 [Lates calcarifer]
c103104.graph_c2	7	7817	8825	24	27	0	0.18	199.6	198.95	0.52	0.57	0	0.000264895	-5.07551	down	[F]	Nucleotide transport and metabolism	Cellular Component: cytoplasm (GO:0005737);; Biological Process: axon guidance (GO:0007411);; Molecular Function: microtubule binding (GO:0008017);; Molecular Function: hydrolase activity, acting on carbon-nitrogen (but not peptide) bonds (GO:0016810);;	K07529|8.3e-267|uah:113270914|K07529 dihydropyrimidinase-like 5 | (RefSeq) DPYSL5; dihydropyrimidinase-related protein 5	[F]	Nucleotide transport and metabolism	Amidohydrolase family;; Amidohydrolase family	Dihydropyrimidinase-related protein 2 OS=Gallus gallus OX=9031 GN=DPYSL2 PE=2 SV=1	Amidohydro-rel domain-containing protein OS=Seriola dumerili OX=41447 PE=3 SV=1	F	Nucleotide transport and metabolism	dihydropyrimidinase-related protein 5-like [Seriola lalandi dorsalis]
c103114.graph_c0	208	1109	1398	132	148	87	4.58	28	29.04	2.46	2.89	2.08	0.00190192	-2.18956	down	--	--	Molecular Function: calcium ion binding (GO:0005509);;	K12804|1.7e-111|ola:101156493|K12804 proline-serine-threonine phosphatase interacting protein 1 | (RefSeq) proline-serine-threonine phosphatase-interacting protein 1	[TU]	--	EF-hand domain pair;; EF hand;; EF-hand domain;; EF-hand domain pair;; EF hand;; Fes/CIP4, and EFC/F-BAR homology domain	Reticulocalbin-2 OS=Crotalus adamanteus OX=8729 PE=1 SV=1	Uncharacterized protein OS=Seriola dumerili OX=41447 PE=4 SV=1	T	Signal transduction mechanisms	reticulocalbin-2 [Seriola dumerili]
c102776.graph_c2	626	1268	1348	298	304	267	10.23	28.42	25.68	4.22	4.38	4.55	0.00733856	-1.37165	down	--	--	Cellular Component: cytoskeleton (GO:0005856);; Molecular Function: cytoskeletal protein binding (GO:0008092);;	K05763|2.4e-12|ovi:T265_01853|K05763 moesin | (RefSeq) hypothetical protein	[R]	General function prediction only	Cytohesin Ubiquitin Protein Inducing Domain	--	FERM domain-containing protein 4B isoform 2 OS=Scophthalmus maximus OX=52904 GN=SMAX5B_014355 PE=4 SV=1	S	Function unknown	FERM domain-containing protein 4B isoform X4 [Seriola dumerili]
c97646.graph_c0	40	226	256	807	1049	331	0.66	4.02	4	11.72	14.78	5.71	0.000739677	2.40828	up	--	--	Molecular Function: zinc ion binding (GO:0008270);;	K12028|1.0e-222|sdu:111239805|K12028 tripartite motif-containing protein 59 | (RefSeq) trim59; tripartite motif-containing protein 59	[O]	Posttranslational modification, protein turnover, chaperones	B-box zinc finger;; RING-type zinc-finger;; Zinc finger, C3HC4 type (RING finger);; Zinc finger, C3HC4 type (RING finger);; Zinc finger, C3HC4 type (RING finger);; zinc-RING finger domain;; Ring finger domain	Tripartite motif-containing protein 59 OS=Gallus gallus OX=9031 GN=TRIM59 PE=2 SV=1	Uncharacterized protein OS=Seriola dumerili OX=41447 PE=4 SV=1	O	Posttranslational modification, protein turnover, chaperones	tripartite motif-containing protein 59 [Seriola dumerili]
c44992.graph_c0	67	327	447	835	2897	297	3.73	19.86	23.72	41.36	139.05	17.35	0.00924618	2.34021	up	--	--	Molecular Function: transcription coregulator activity (GO:0003712);; Biological Process: regulation of transcription by RNA polymerase II (GO:0006357);; Cellular Component: mediator complex (GO:0016592);;	K15148|8.9e-136|sdu:111226676|K15148 mediator of RNA polymerase II transcription subunit 7 | (RefSeq) med7; mediator of RNA polymerase II transcription subunit 7	[K]	Transcription	MED7 protein	Mediator of RNA polymerase II transcription subunit 7 OS=Danio rerio OX=7955 GN=med7 PE=2 SV=1	Mediator of RNA polymerase II transcription subunit 7 OS=Collichthys lucidus OX=240159 GN=D9C73_006677 PE=3 SV=1	K	Transcription	mediator of RNA polymerase II transcription subunit 7 [Seriola dumerili]
c93210.graph_c0	357	466	540	824	1378	721	9.55	13.57	13.76	19.53	31.62	20.25	0.00312437	1.39229	up	[R]	General function prediction only	Molecular Function: zinc ion binding (GO:0008270);;	K06874|6.3e-239|sdu:111233629|K06874 zinc finger protein | (RefSeq) zpr1; zinc finger protein ZPR1	[R]	General function prediction only	ZPR1 zinc-finger domain	--	ZPR1 zinc finger OS=Neolamprologus brichardi OX=32507 PE=3 SV=1	S	Function unknown	zinc finger protein ZPR1 [Seriola dumerili]
c96548.graph_c0	29	1997	2587	62	133	29	0.42	30.8	35.2	0.8	1.66	0.44	0.00472739	-3.24053	down	--	--	Biological Process: tissue homeostasis (GO:0001894);; Biological Process: retina homeostasis (GO:0001895);; Molecular Function: molecular_function (GO:0003674);; Molecular Function: binding (GO:0005488);; Cellular Component: cellular_component (GO:0005575);; Cellular Component: intracellular (GO:0005622);; Cellular Component: obsolete cell (GO:0005623);; Cellular Component: cytoplasm (GO:0005737)…	--	--	--	Ciliary protein causing Leber congenital amaurosis disease	--	Lebercilin domain-containing protein OS=Seriola dumerili OX=41447 PE=3 SV=1	S	Function unknown	lebercilin isoform X1 [Seriola dumerili]
c101512.graph_c0	16	26	47	119	346	103	1.88	2.21	1.62	12.58	35.97	8.68	4.86e-06	2.8368	up	--	--	Molecular Function: nucleic acid binding (GO:0003676);; Biological Process: DNA integration (GO:0015074);;	K21396|5.4e-38|tnl:113504667|K21396 ATP-binding cassette, subfamily G (WHITE), eye pigment precursor transporter | (RefSeq) protein white-like	[R]	General function prediction only	Reverse transcriptase (RNA-dependent DNA polymerase);; THAP domain	--	CCHC-type zinc finger, nucleic acid binding protein a (Fragment) OS=Nothobranchius pienaari OX=704102 GN=CNBPA PE=4 SV=1	L	Replication, recombination and repair	uncharacterized protein LOC102082235 isoform X1 [Oreochromis niloticus]
c96280.graph_c1	34	197	151	13	26	15	0.78	4.89	3.28	0.26	0.51	0.36	0.00294523	-2.15879	down	--	--	Cellular Component: Golgi membrane (GO:0000139);; Molecular Function: molecular_function (GO:0003674);; Molecular Function: GTPase activator activity (GO:0005096);; Molecular Function: binding (GO:0005488);; Molecular Function: protein binding (GO:0005515);; Cellular Component: cellular_component (GO:0005575);; Cellular Component: intracellular (GO:0005622);; Cellular Component: obsolete cell (GO…	K20133|0.0e+00|sdu:111224989|K20133 USP6 N-terminal-like protein | (RefSeq) usp6nl; USP6 N-terminal-like protein isoform X1	[R]	General function prediction only	Rab-GTPase-TBC domain	Rab GTPase-activating protein 1-like OS=Gallus gallus OX=9031 GN=RABGAP1L PE=2 SV=1	Rab-GAP TBC domain-containing protein OS=Lates calcarifer OX=8187 GN=usp6nl PE=4 SV=1	S	Function unknown	USP6 N-terminal-like protein isoform X3 [Seriola lalandi dorsalis]
c99292.graph_c0	132	487	410	1338	2307	830	3.59	14.36	10.62	32.24	53.76	23.68	1.16e-06	2.46718	up	--	--	Cellular Component: nucleolus (GO:0005730);; Biological Process: rRNA processing (GO:0006364);; Biological Process: positive regulation of angiogenesis (GO:0045766);;	K14549|2.0e-259|sdu:111236502|K14549 U3 small nucleolar RNA-associated protein 15 | (RefSeq) utp15; U3 small nucleolar RNA-associated protein 15 homolog	[S]	Function unknown	UTP15 C terminal;; WD domain, G-beta repeat;; Anaphase-promoting complex subunit 4 WD40 domain	U3 small nucleolar RNA-associated protein 15 homolog OS=Xenopus laevis OX=8355 GN=utp15 PE=2 SV=1	U3 small nucleolar RNA-associated protein 15 homolog OS=Seriola dumerili OX=41447 PE=4 SV=1	D	Cell cycle control, cell division, chromosome partitioning	U3 small nucleolar RNA-associated protein 15 homolog [Seriola dumerili]
c93711.graph_c0	290	482	375	800	1453	521	6.14	10.77	6.85	14.73	26.14	11.31	0.00195218	1.51631	up	--	--	Molecular Function: molecular_function (GO:0003674);; Molecular Function: transcription coregulator activity (GO:0003712);; Molecular Function: transcription coactivator activity (GO:0003713);; Cellular Component: cellular_component (GO:0005575);; Cellular Component: intracellular (GO:0005622);; Cellular Component: obsolete cell (GO:0005623);; Cellular Component: nucleus (GO:0005634);; Biological…	K15623|7.0e-119|mcc:709897|K15623 protein SSXT | (RefSeq) SS18; protein SSXT	[K]	Transcription	SSXT protein (N-terminal region)	Calcium-responsive transactivator OS=Xenopus laevis OX=8355 GN=ss18l1 PE=2 SV=1	Calcium-responsive transactivator ss18-like protein 1 OS=Larimichthys crocea OX=215358 GN=D5F01_LYC10474 PE=4 SV=1	K	Transcription	protein SSXT isoform X1 [Echeneis naucrates]
c97150.graph_c0	1	20	6	2093	6476	798	0.03	0.65	0.17	55.65	166.7	25.15	1.16e-20	7.791	up	--	--	Molecular Function: carbohydrate transmembrane transporter activity (GO:0015144);; Cellular Component: integral component of membrane (GO:0016021);;	--	--	--	Transmembrane family, TMEM144 of transporters;; Sugar transport protein	--	Uncharacterized protein OS=Seriola dumerili OX=41447 PE=3 SV=1	S	Function unknown	transmembrane protein 144 [Seriola lalandi dorsalis]
c97947.graph_c1	1268	1985	1966	2923	4349	2283	30.61	53.6	46.9	64.58	94.38	58.58	0.00448798	1.20088	up	[J]	Translation, ribosomal structure and biogenesis	Molecular Function: GTPase activity (GO:0003924);; Molecular Function: GTP binding (GO:0005525);;	K03267|0.0e+00|sdu:111236263|K03267 peptide chain release factor subunit 3 | (RefSeq) eukaryotic peptide chain release factor GTP-binding subunit ERF3A isoform X1	[J]	Translation, ribosomal structure and biogenesis	Elongation factor Tu GTP binding domain;; Elongation factor Tu C-terminal domain;; Ataxin-2 C-terminal region	Elongation factor 1-alpha OS=Oryzias latipes OX=8090 GN=eef1a PE=2 SV=1	Tr-type G domain-containing protein OS=Seriola dumerili OX=41447 PE=4 SV=1	J	Translation, ribosomal structure and biogenesis	eukaryotic peptide chain release factor GTP-binding subunit ERF3A isoform X1 [Seriola lalandi dorsalis]
[truncated: 1,871 more rows]

## Sheet: Table S6
#GO_classify1	GO_classify2	All	DE	ratio
#Total_gene		23633	1903	0.080523
molecular function	binding	13049	1030	0.0789333
biological process	cellular process	12682	974	0.0768018
biological process	single-organism process	10517	808	0.076828
cellular component	cell part	10262	789	0.0768856
cellular component	cell	10263	789	0.0768781
[truncated: 55 more rows]

## Sheet: Table S8
#KEGG_n	713	KEGG_N	10672
[truncated: 226 more rows]
